# Supplementary material for: Squaramide-catalysed asymmetric cascade reactions of 2,3-dioxopyrrolidines with 3-chlorooxindoles
Source: Royal Society of Chemistry journal article supplement (doi:10.1039/c9ob02663k), 2020-01-01

# Squaramide–catalysed asymmetric cascade reactions of 2,3-dioxopyrrolidines with 3-chlorooxindoles

Jiang-Bo Wen and Da-Ming Du\*

*School of Chemistry and Chemical Engineering, Beijing Institute of Technology,  
Beijing 100081, People's Republic of China*  
[dudm@bit.edu.cn](mailto:dudm@bit.edu.cn)

## *Supporting Information*

### **Contents**

1. General information and starting materials.....S1
2. General procedure for the synthesis of compound **3**.....S2
3. Copies of  $^1\text{H}$ ,  $^{13}\text{C}$  and  $^{19}\text{F}$  NMR spectra of new products.....S3
4. Copies of HPLC chromatograms of products.....S66

## 1. General information and starting materials

**General information.** All solvents commercially and available chemicals were used without further purification. The column chromatography was performed with silica gel (200–300 mesh) using mixtures of petroleum ether and ethyl acetate. Melting points were determined with a XT-4 melting-point apparatus without corrected.  $^1\text{H}$  NMR spectra were measured with Bruker Ascend 400 MHz spectrometer, and chemical shifts were reported in  $\delta$  (ppm) units relative to tetramethylsilane (TMS) as the internal standard.  $^{13}\text{C}$  NMR spectra were measured at 100 MHz with Bruker Ascend 400 MHz spectrometer and chemical shifts are reported in  $\delta$  (ppm) units relative to tetramethylsilane and referenced to the solvent peak ( $\text{CDCl}_3$ ,  $\delta(\text{C}) = 77.00$  ppm, acetone- $d_6$   $\delta(\text{C}) = 30.83$  ppm, DMSO- $d_6$   $\delta(\text{C}) = 39.43$  ppm).  $^{19}\text{F}$  NMR spectra were measured at 376 MHz with Bruker Ascend 400 MHz spectrometer. Proton coupling patterns are described as singlet (s), doublet (d), triplet (t), quartet (q), multiplet (m), and broad (br). High-resolution mass spectra were obtained with an Agilent 6520 Accurate-Mass-Q-TOF MS system equipped with an electrospray ionization (ESI) source. The enantiomeric excesses were determined by chiral HPLC analysis using an Agilent 1200 LC instrument with Daicel Chiralpak IA, IB, IC or AD-H columns. Optical rotations were measured with Krüss P8000 polarimeter at the indicated concentration with the units of grams per 100 mL at 20 °C using sodium D light.

**Starting materials.** **1a–1t** were prepared according to the literature.<sup>[1]</sup>

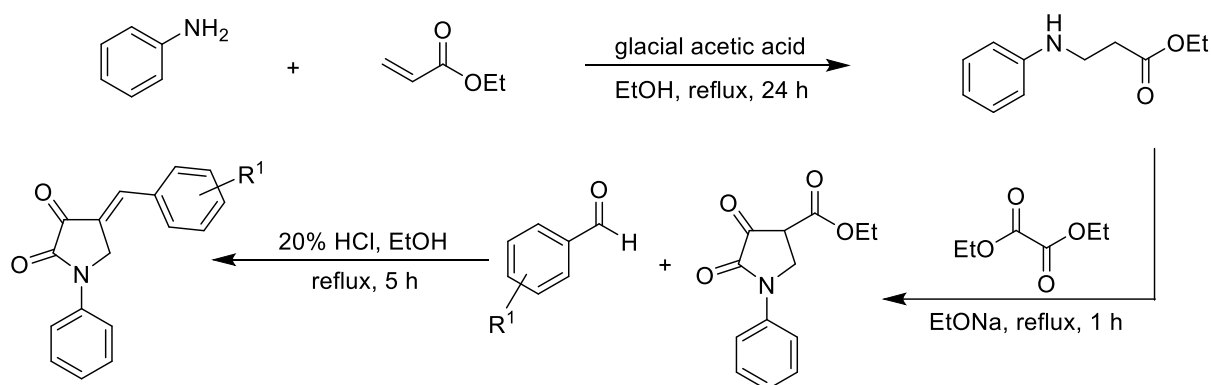

**2a–2i** were prepared according to the literature.<sup>[2]</sup> The squaramide organocatalysts were prepared by following the reported procedures.<sup>[3]</sup>

## 2. General procedure for the synthesis of compound 3

To a dried small bottle were added 2,3-dioxopyrrolidines **1** (0.1mmol), 3-chlorooxindoles **2** (0.12 mmol), squaramide catalyst **C1** (5 mol%) and  $\text{NH}_4\text{HCO}_3$ (0.1 mmol) in 1.0 mL of AcOEt at 0°C. The reaction mixture was stirred for 2 h and the progress of the reaction was monitored by TLC analysis (Petroleum ether/ ethyl acetate = 1:1). After the completion of the reaction, the crude product mixture was purified by flash column chromatography on silica (petroleum ether/ethyl acetate = 4:1) to afford the pure product **3**. The racemic standard of **3** was prepared using achiral catalyst **C16**.<sup>[4]</sup>

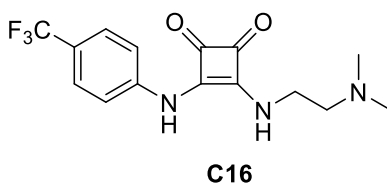

## References

- [1] X. Chen, L. Zhu, L. Fang, S. Yan and J. Lin, *RSC Adv.* **2014**, 4, 9926.
- [2] a) J. Guillaumel, P. Demerseman, J.-M. Clavel, R. Royer, *J. Heterocycl. Chem.* **1980**, 17, 1531-1536. b) A. Noole, A. V. Malkov, T. Kanger, *Synthesis* **2013**, 45, 2520-2524. c) A. Noole, M. Ošek, T. Pehk, M. Öeren, I. Järving, M. R. J. Elsegood, A. V. Malkov, M. Lopp, T. Kanger, *Adv. Synth. Catal.* **2013**, 355, 829-835. d) S. Paladhi, S. Y. Park, J. W. Yang, C. E. Song, *Org. Lett.* **2017**, 19, 5336-5339.
- [3] a) Y. Zhu, J. P. Malerich, V. H. Rawal, *Angew. Chem., Int. Ed.* **2010**, 49, 153–156; *Angew. Chem.* 2010, 122, 157–160. b) W. Yang, D. M. Du, *Org. Lett.* **2010**, 12, 5450–5453. c) W. Yang, D. M. Du, *Adv. Synth. Catal.* **2011**, 353, 1241–1246.
- [4] S. Sopeña, E. Martín, E. -C. Escuder and A. -W. Kleij, *ACS Catal.* **2017**, 7, 3532.

### 3. Copies of $^1\text{H}$ , $^{13}\text{C}$ and $^{19}\text{F}$ NMR spectra of new products

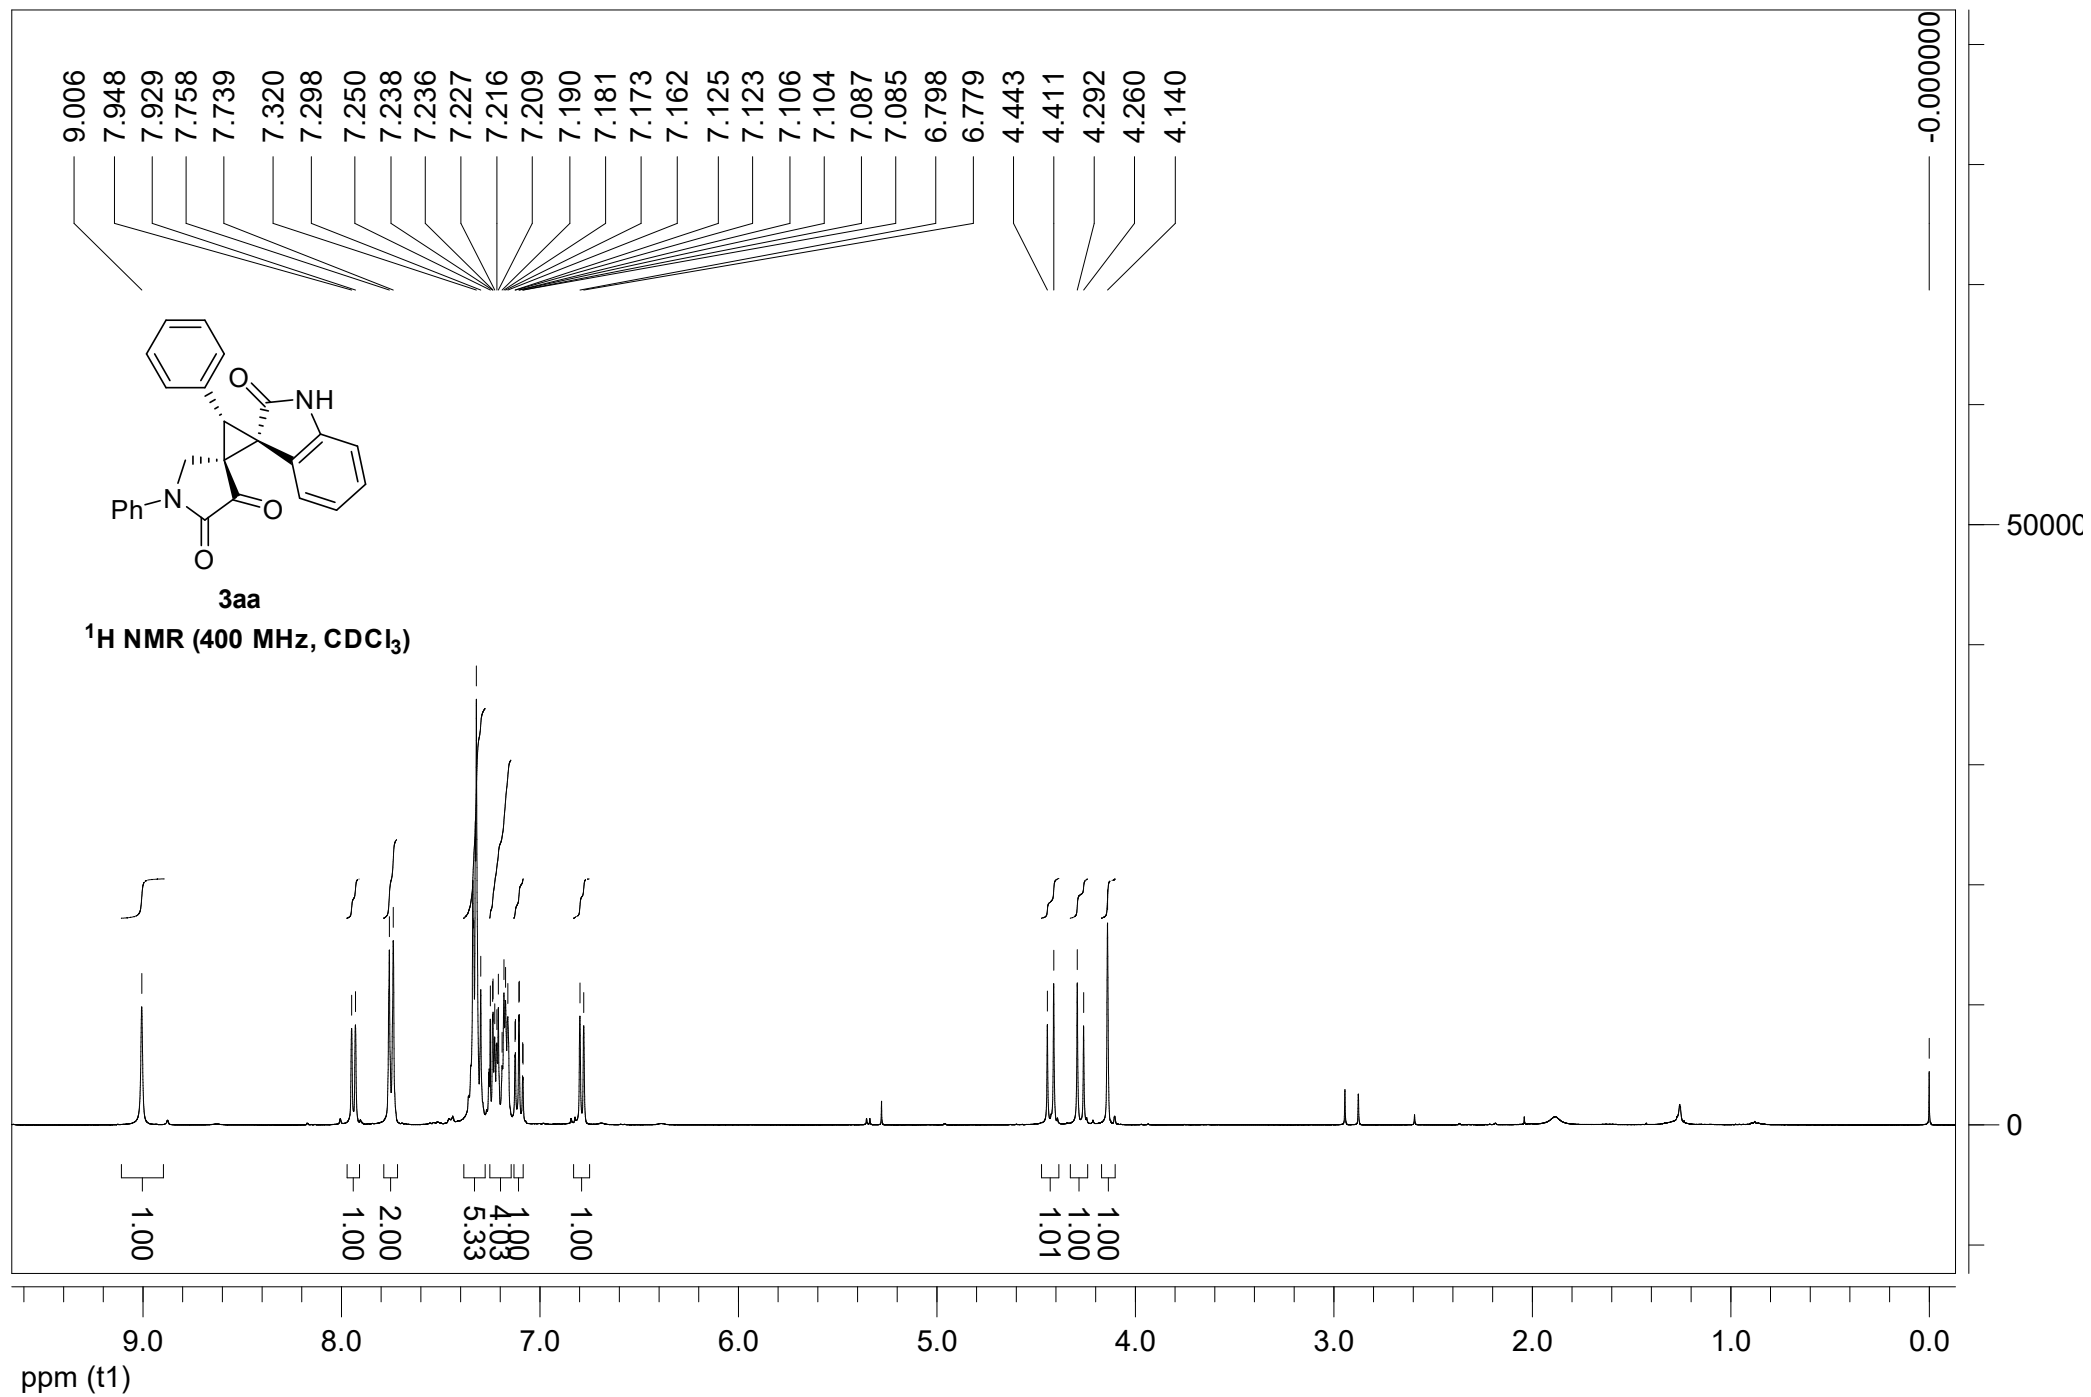

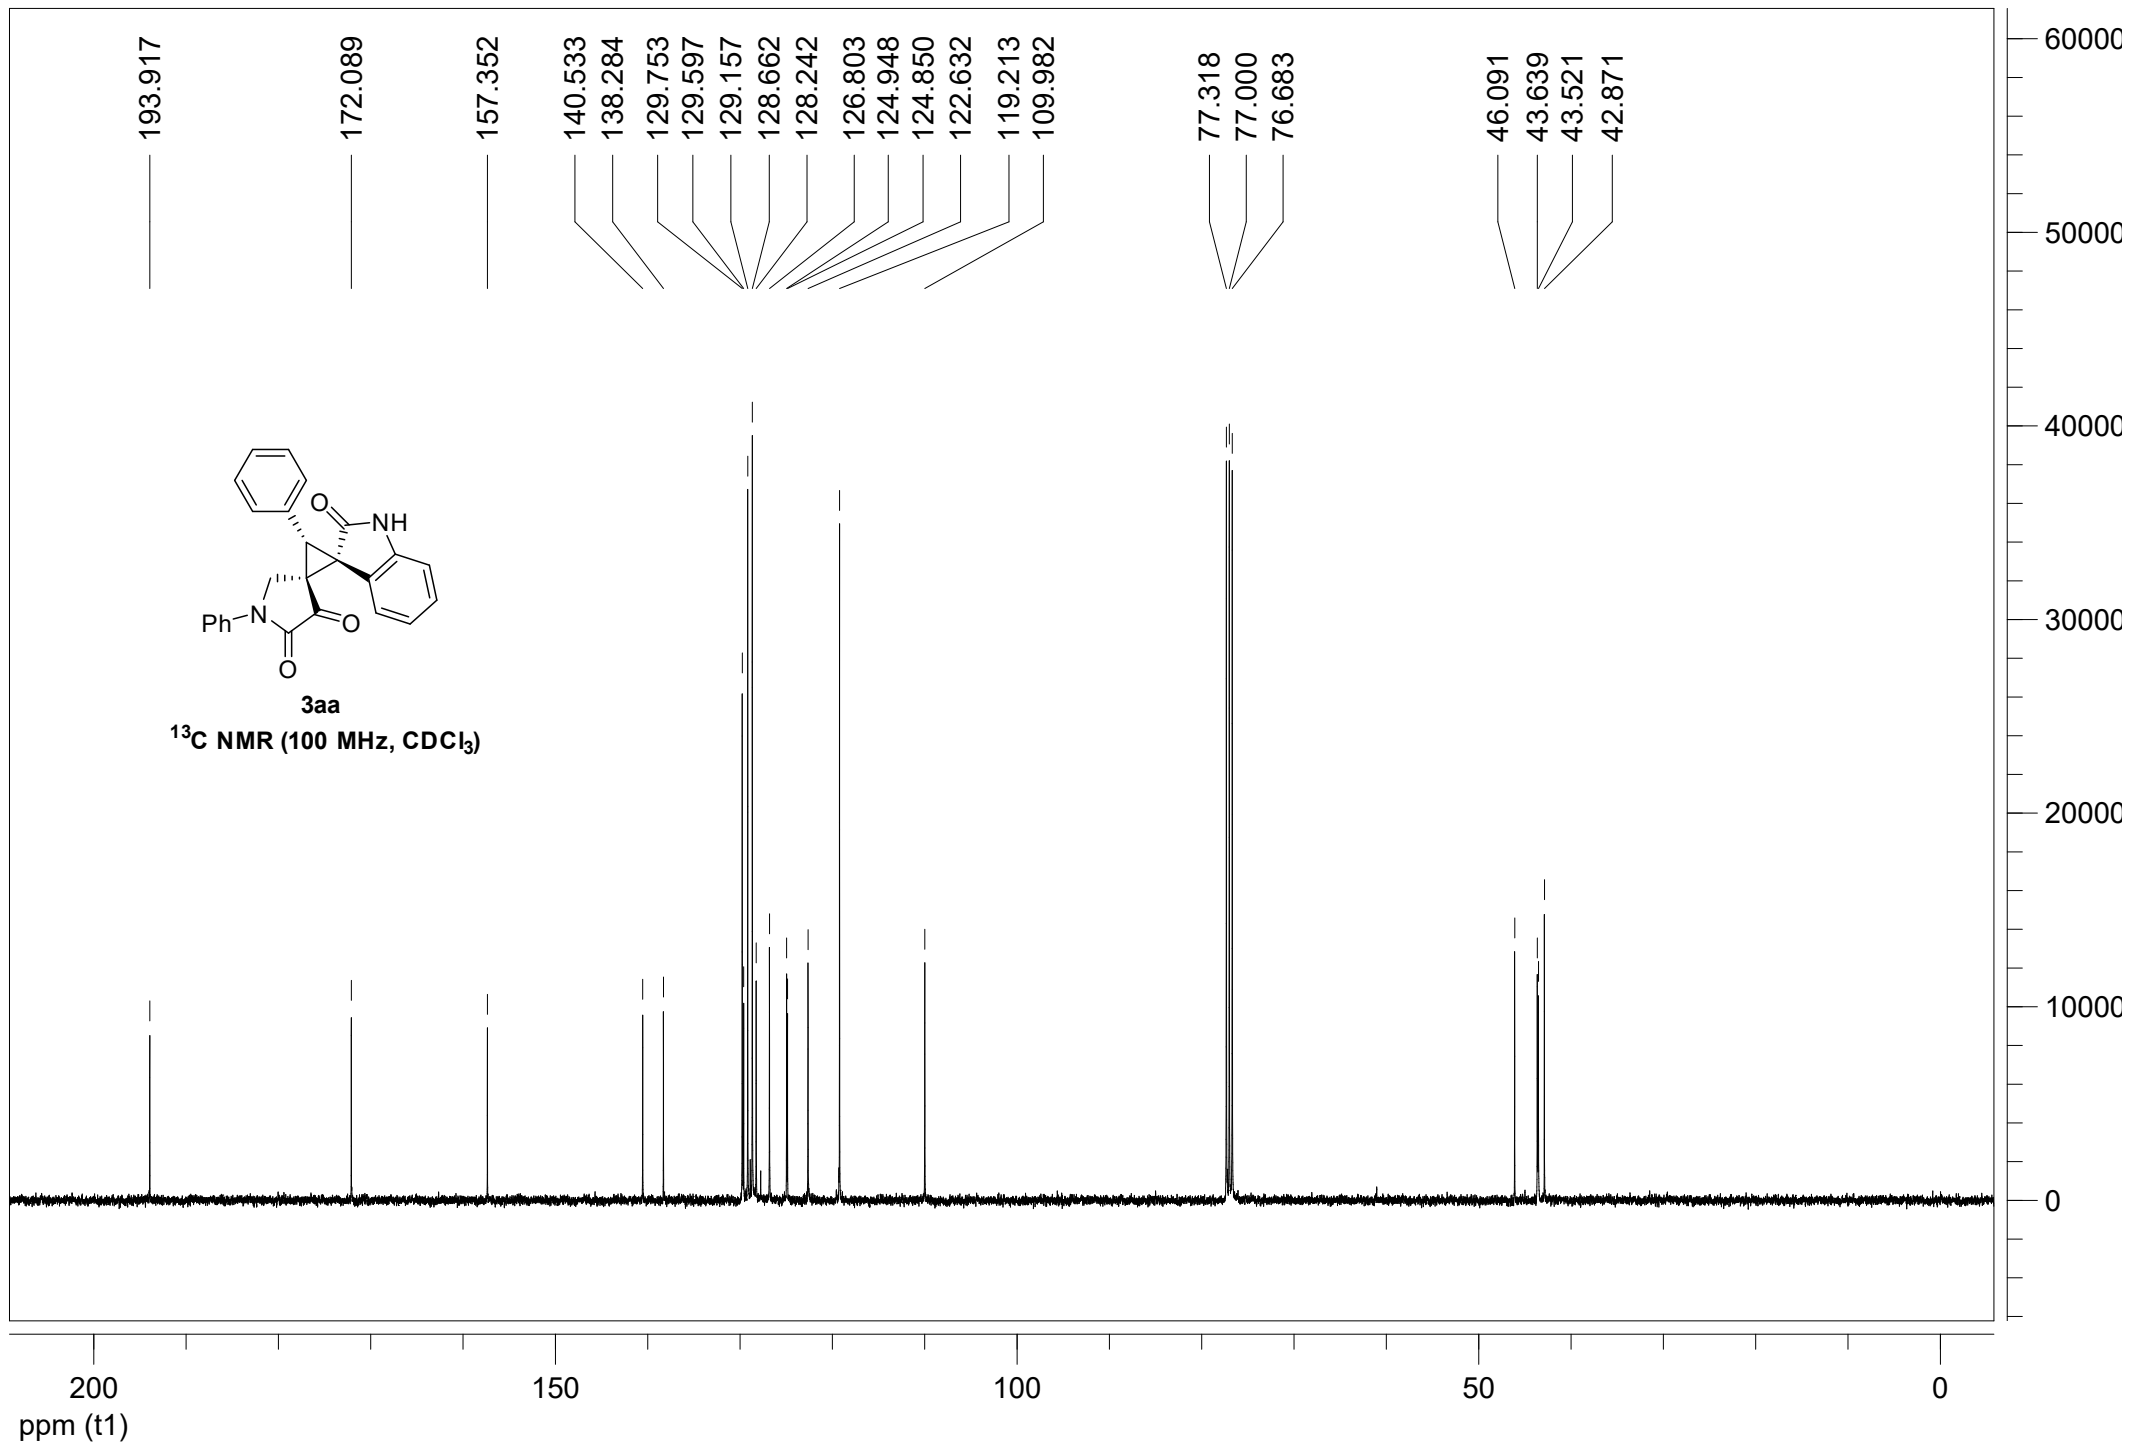

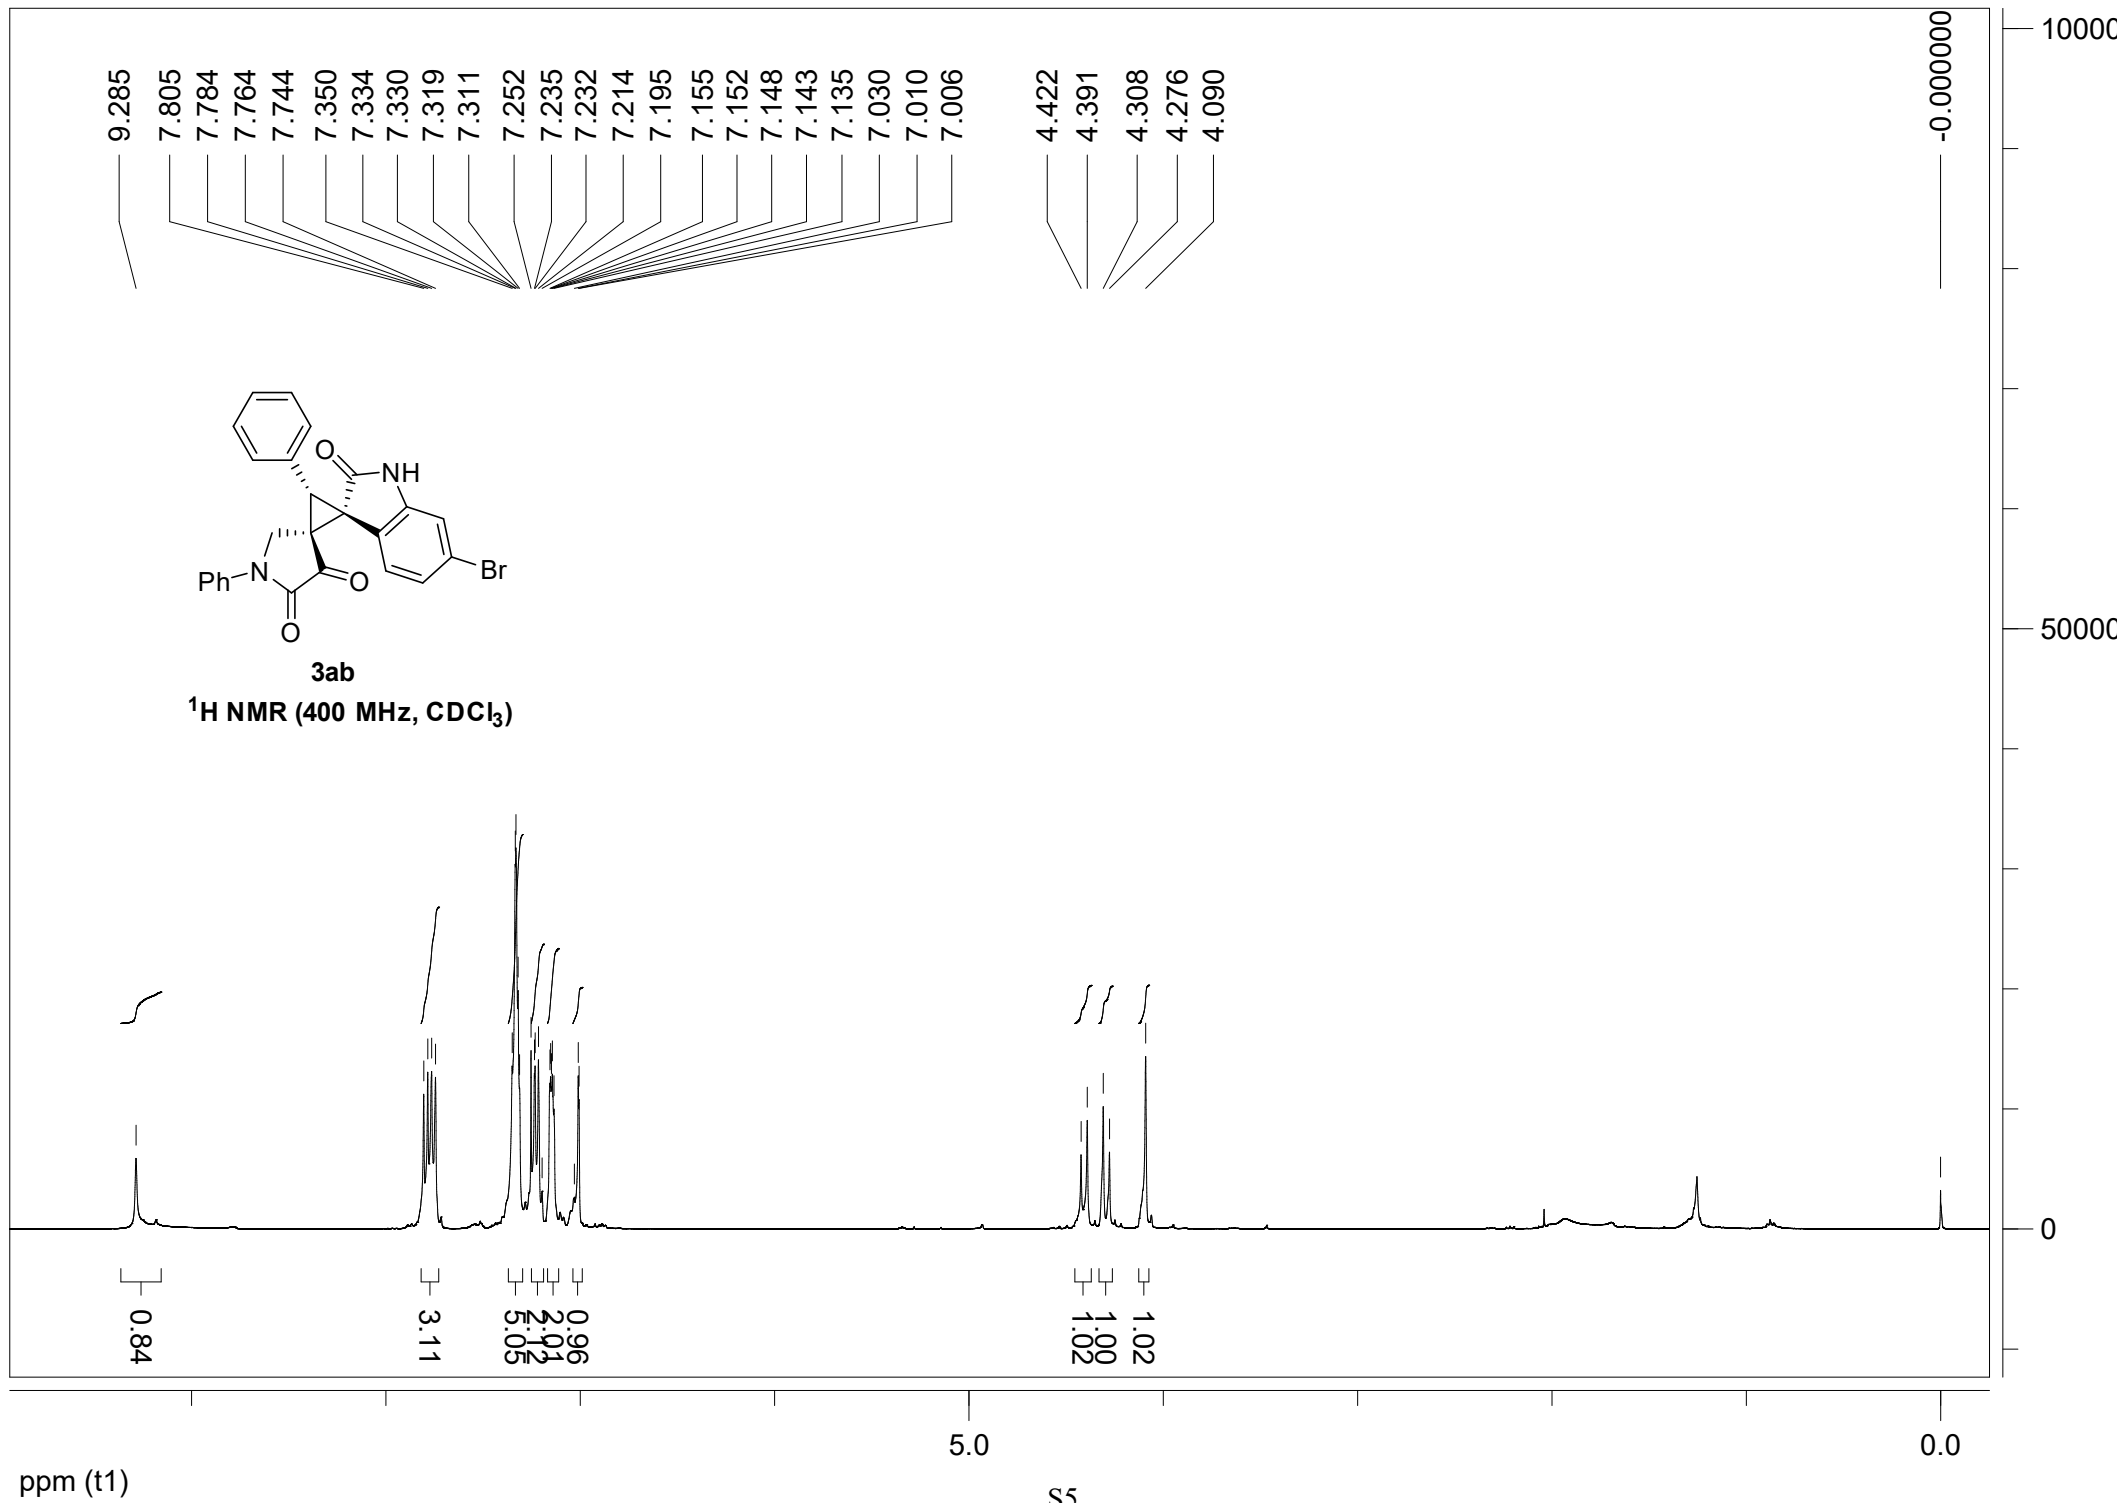

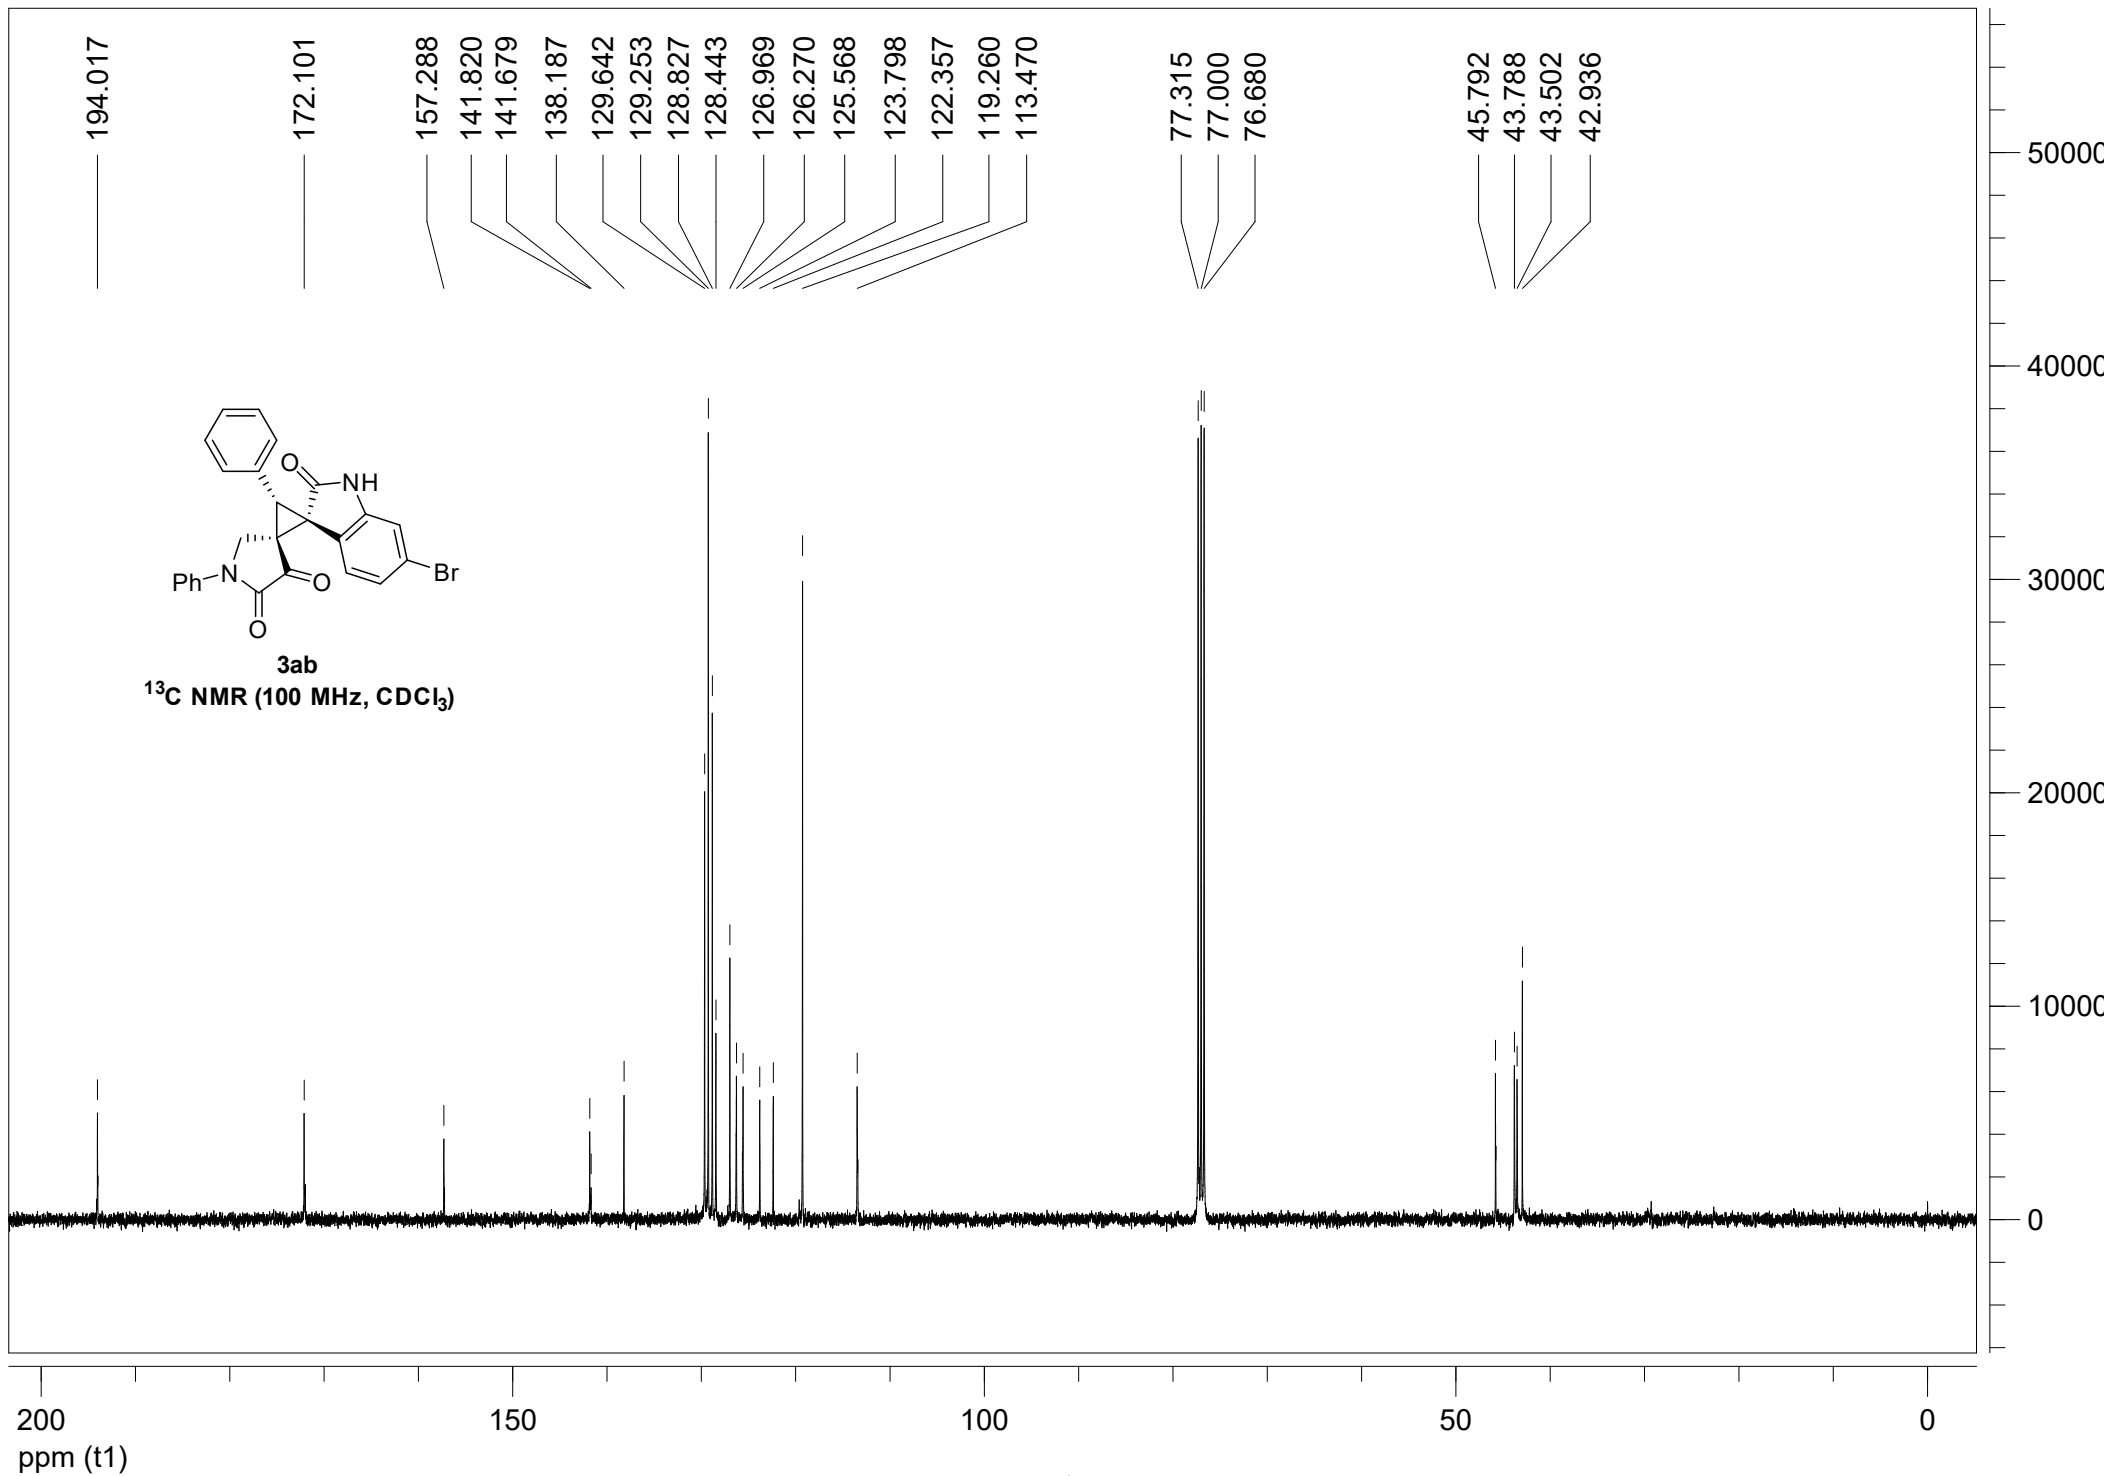

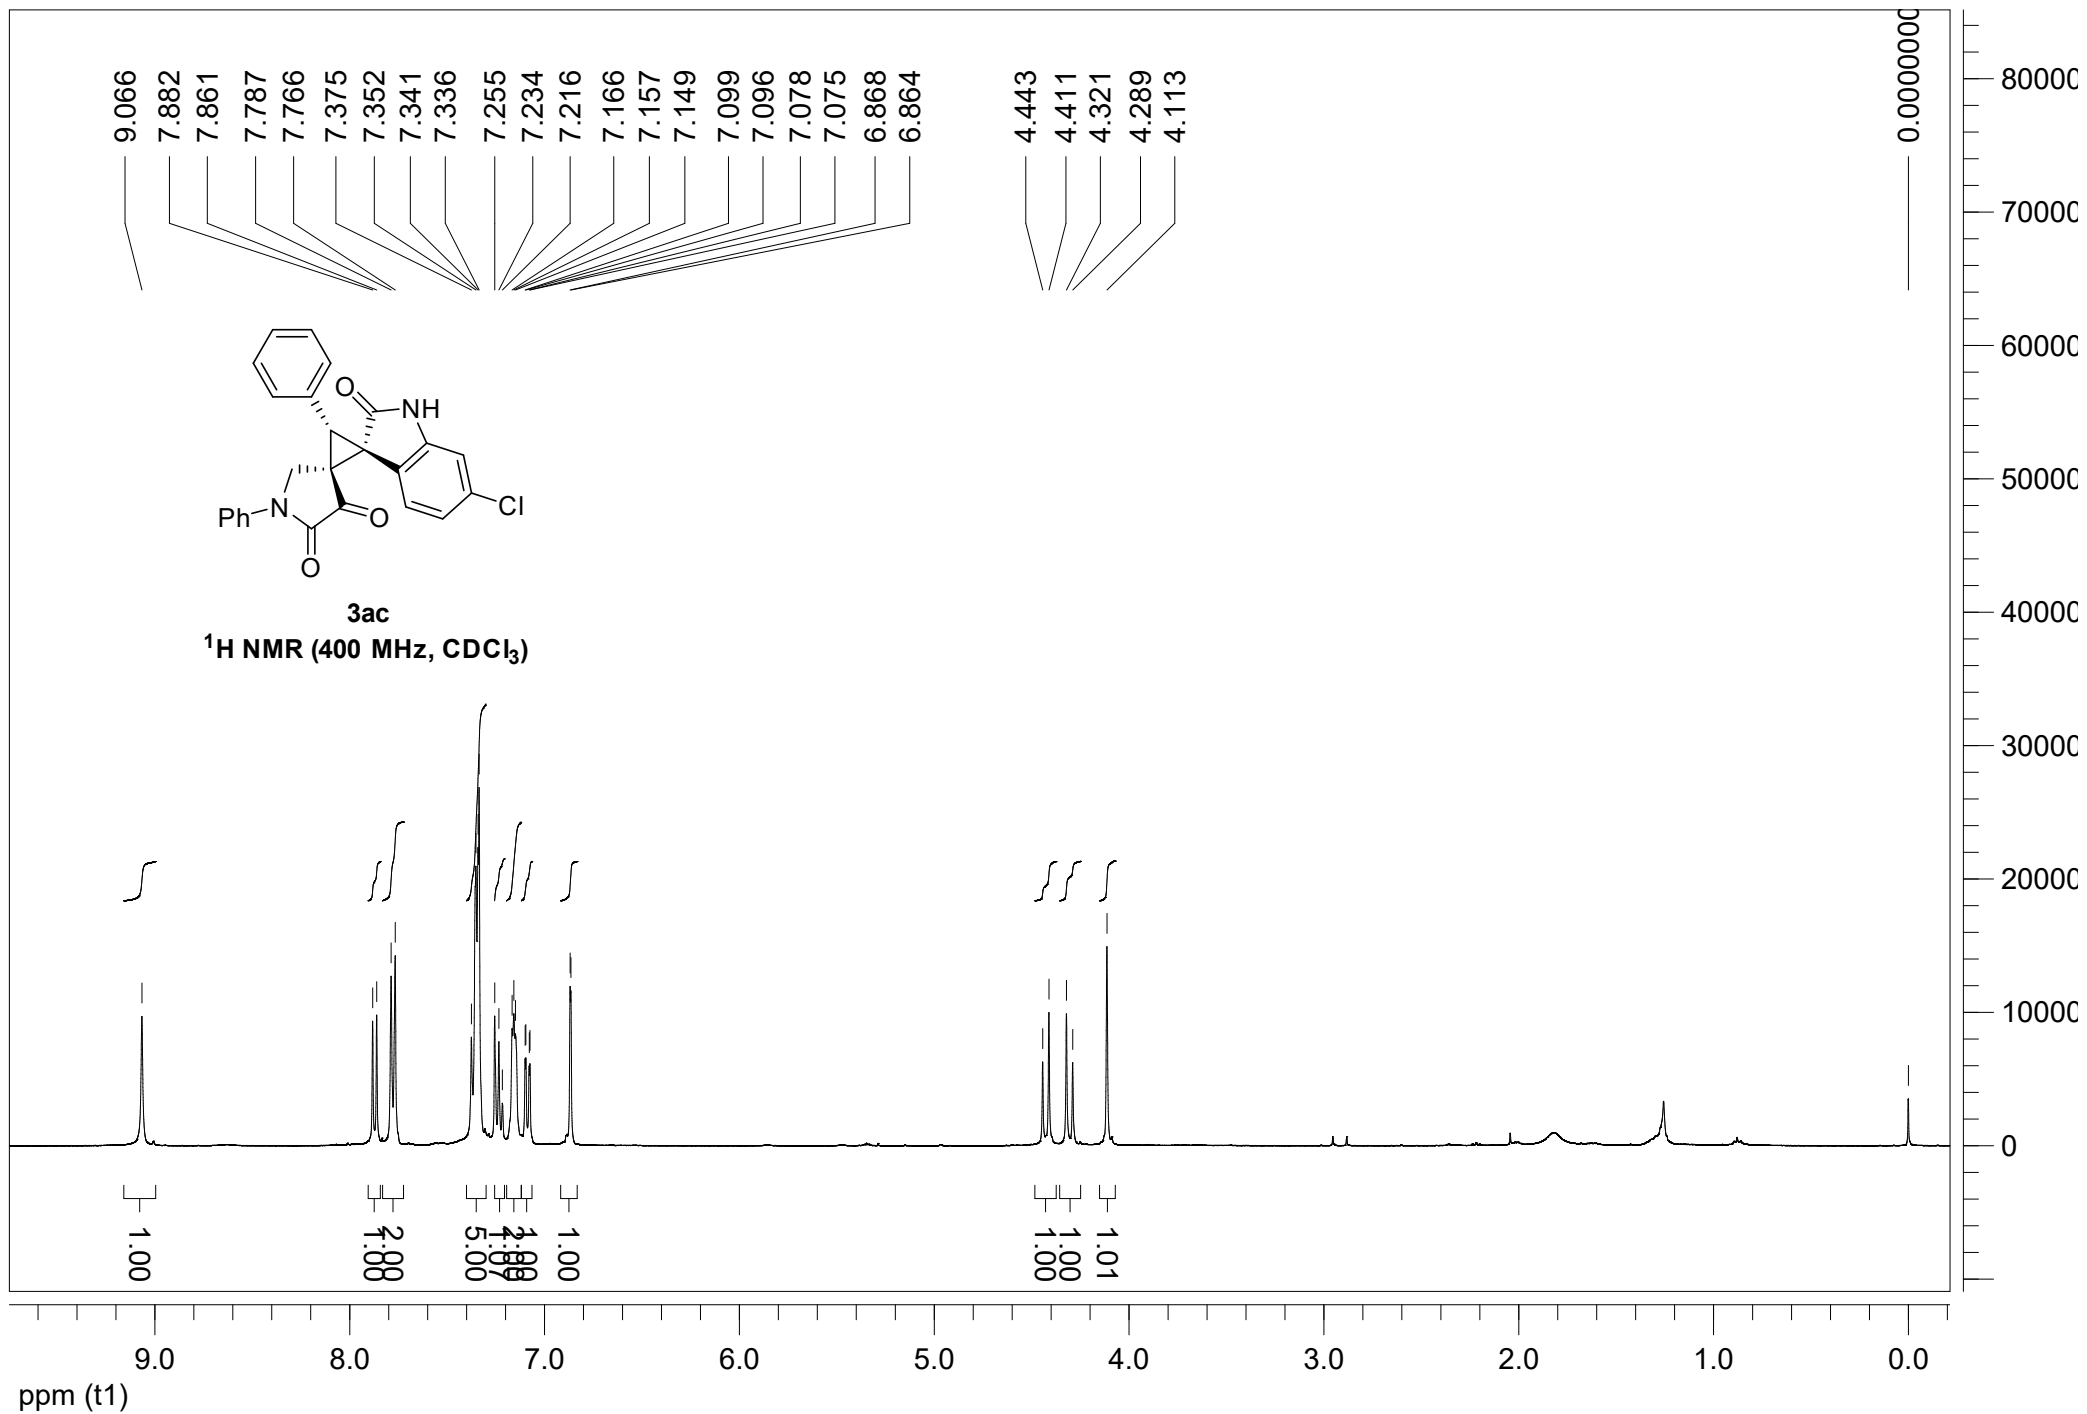



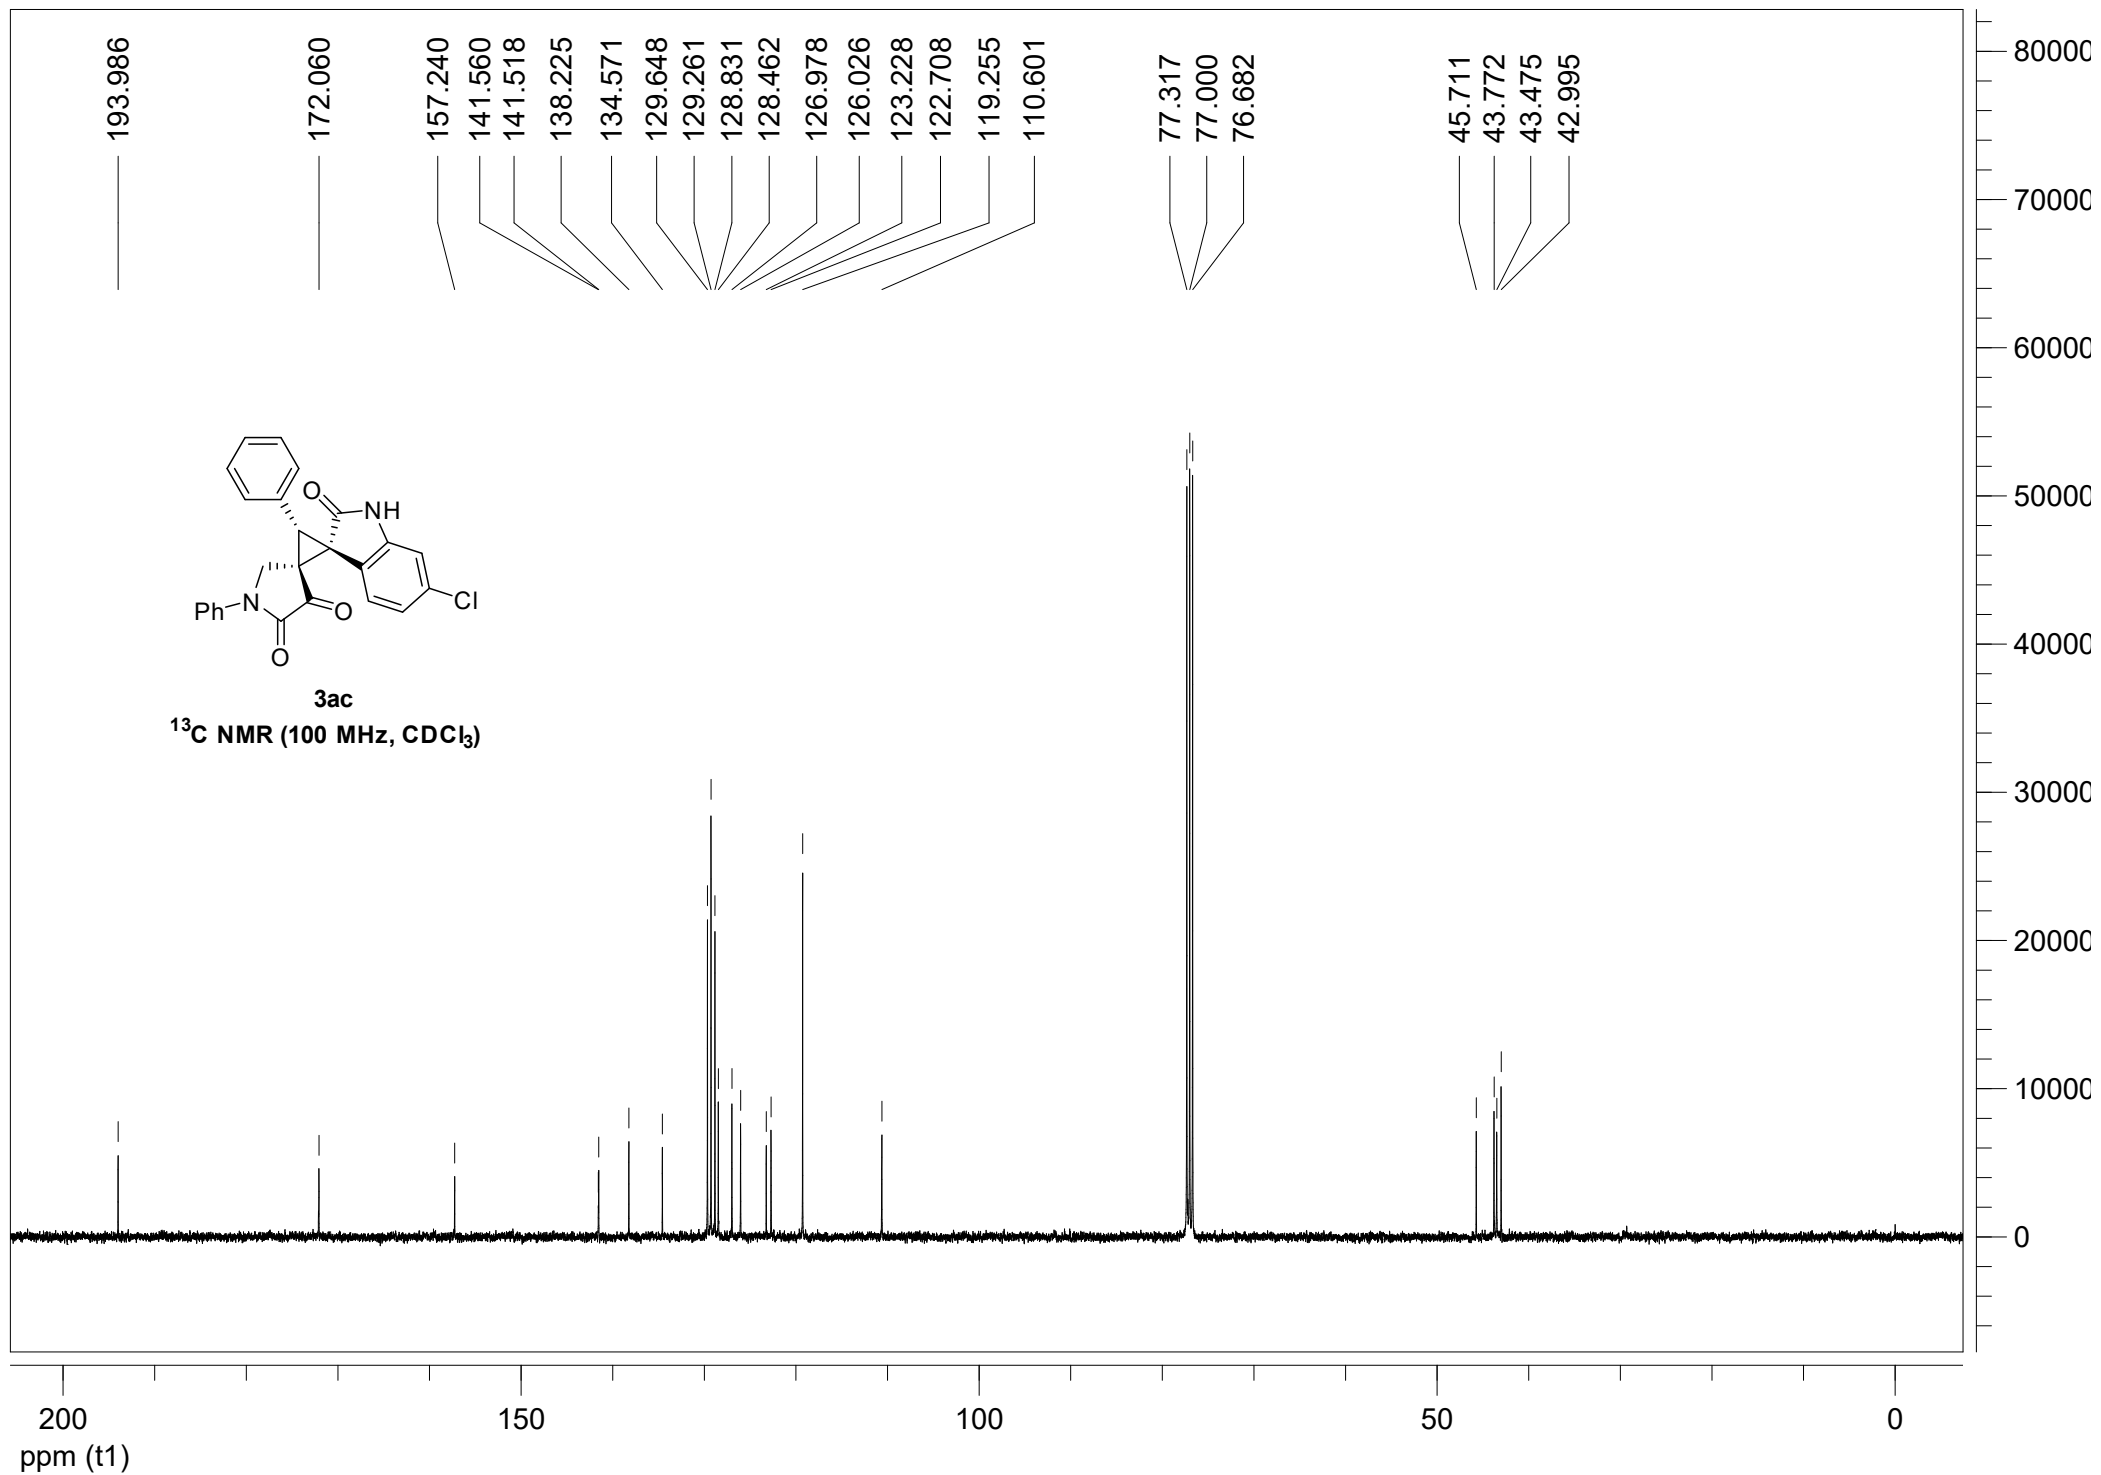

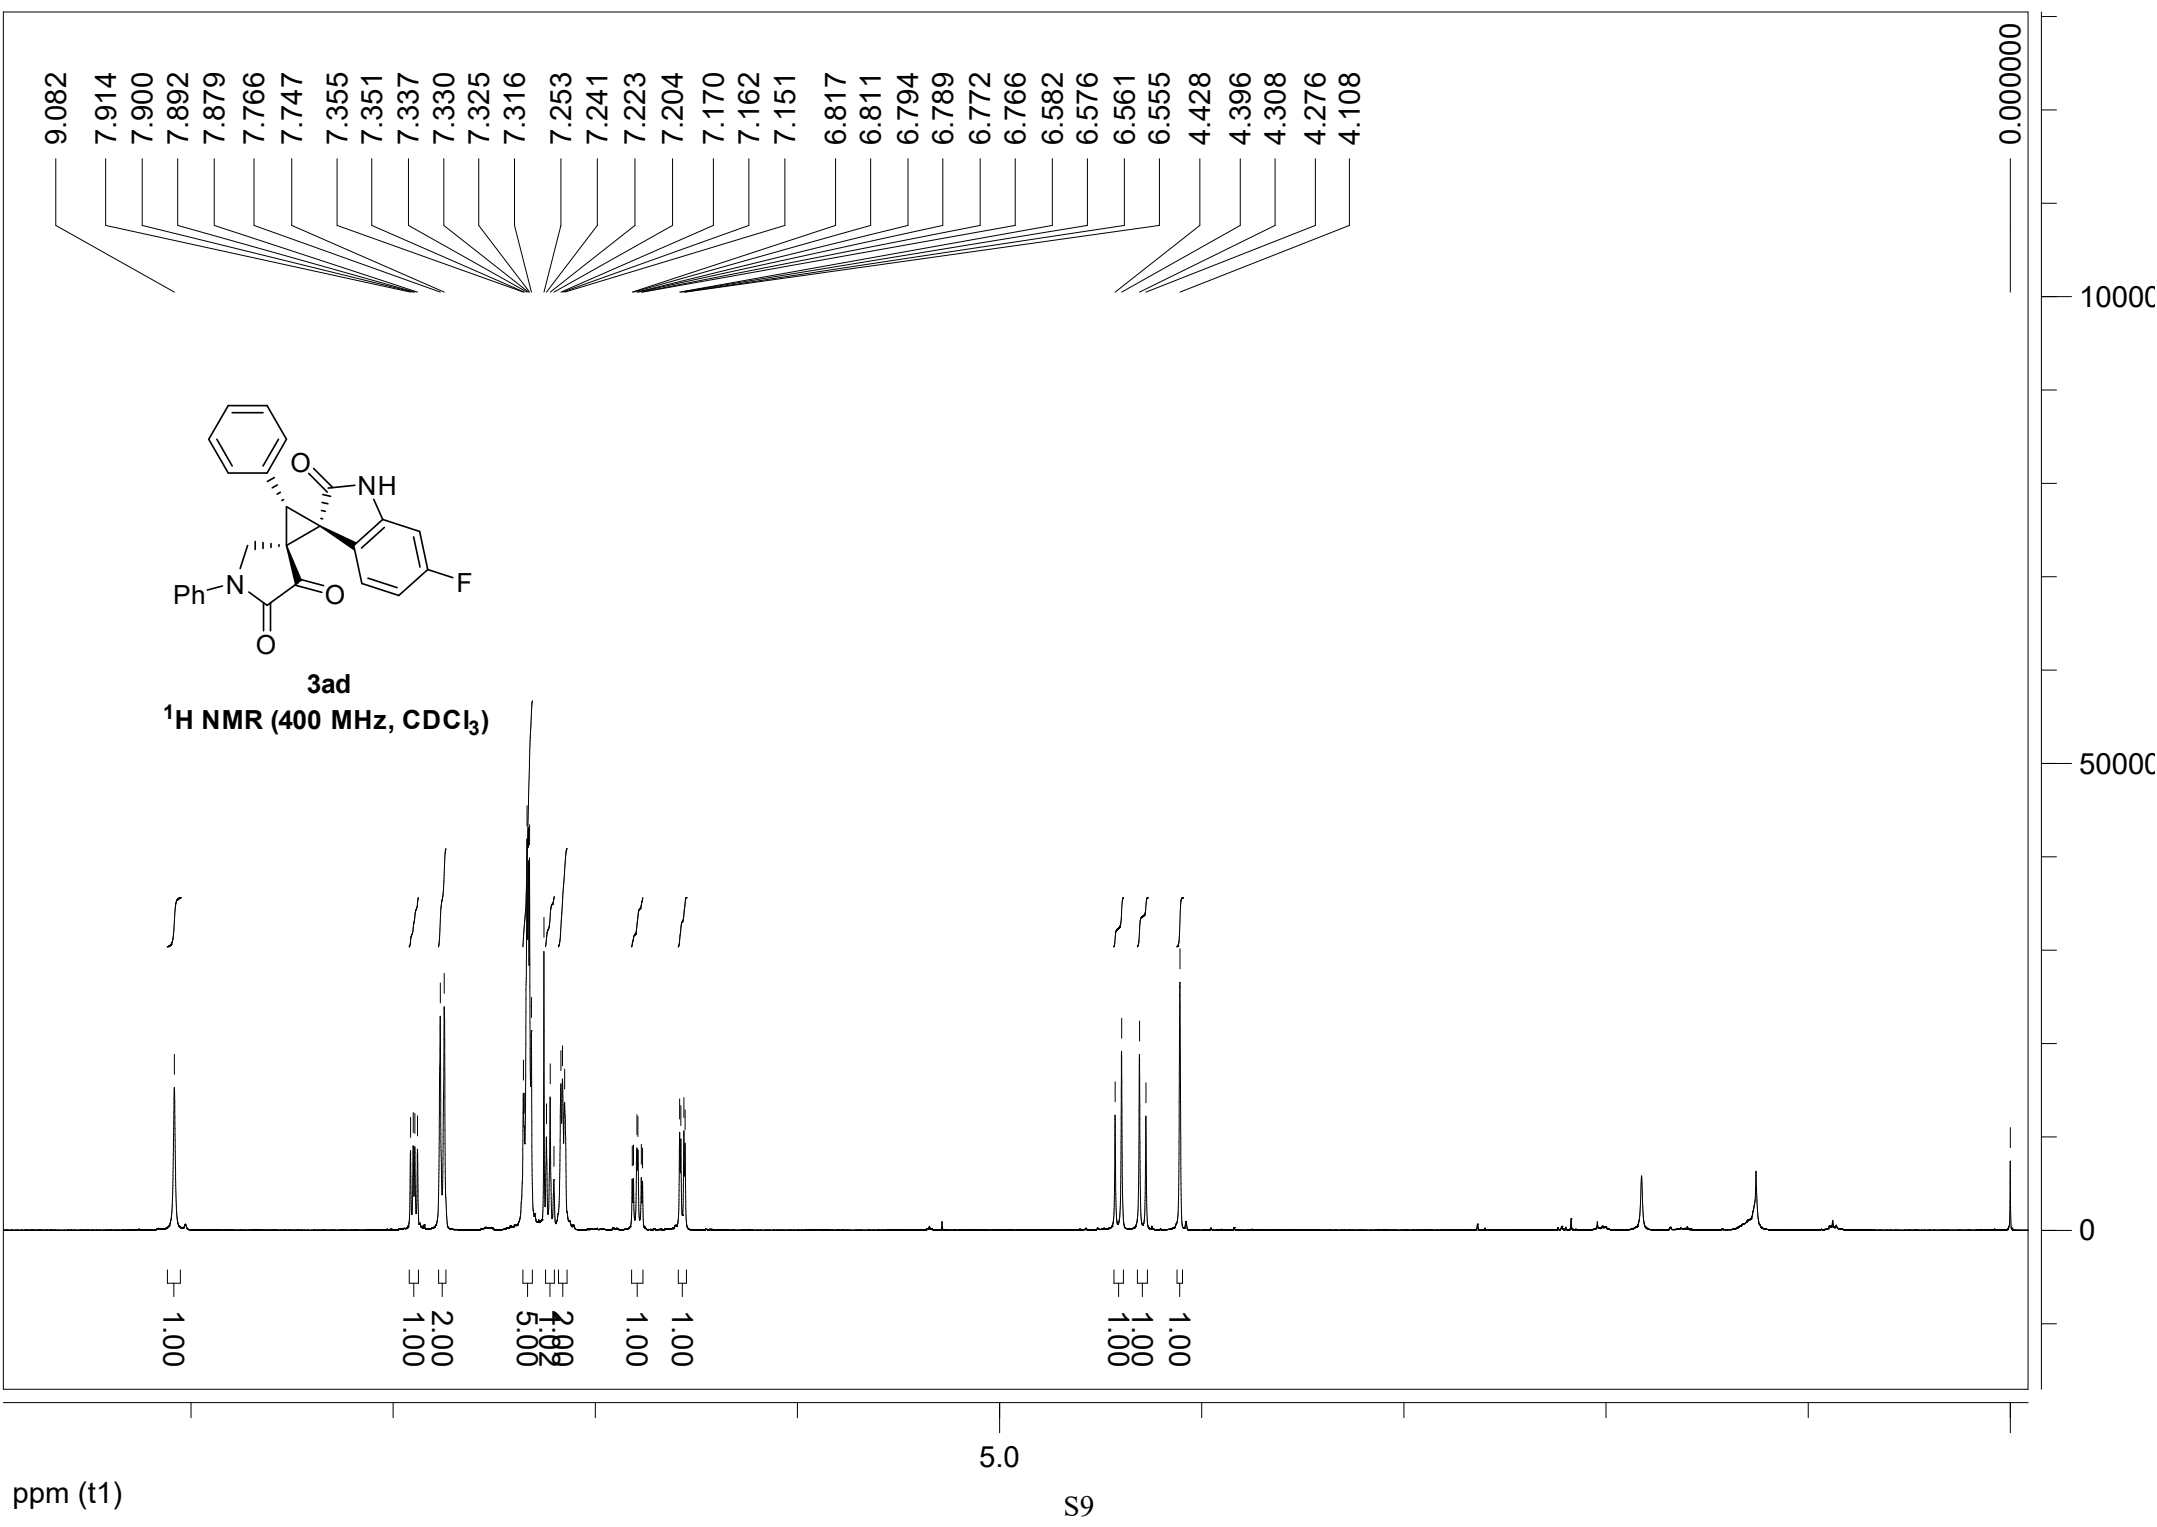

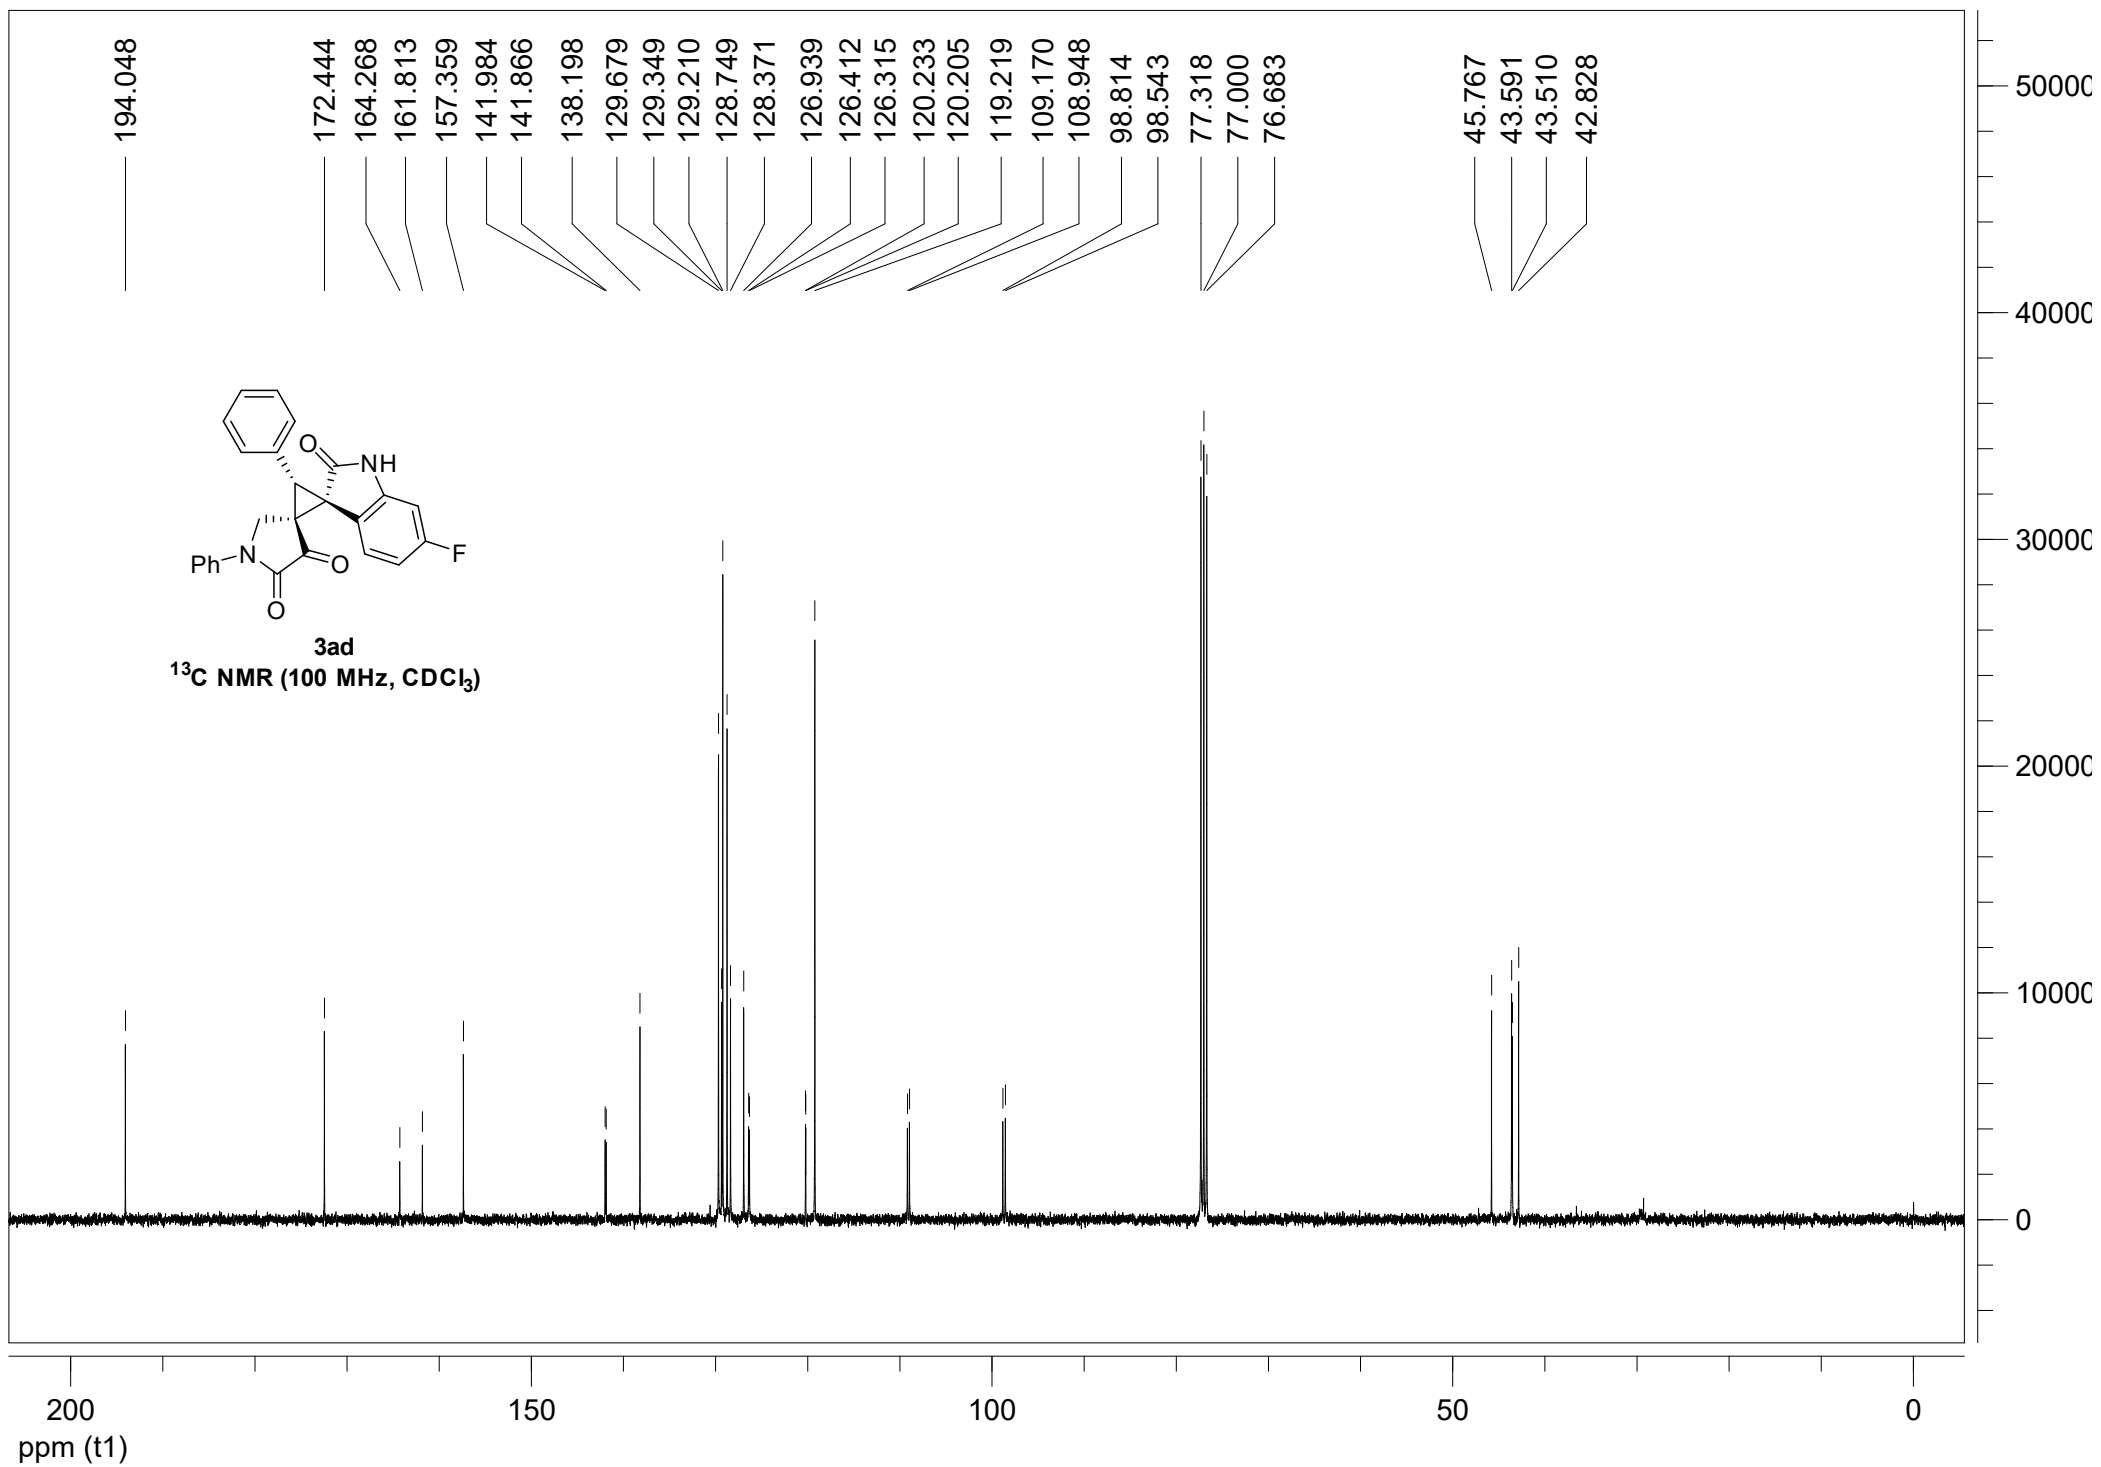

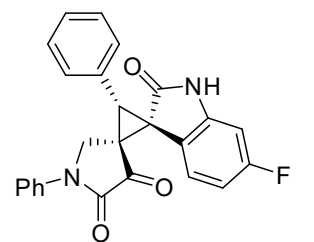

3ad

$^{19}\text{F}$  NMR (376 MHz,  $\text{CDCl}_3$ )

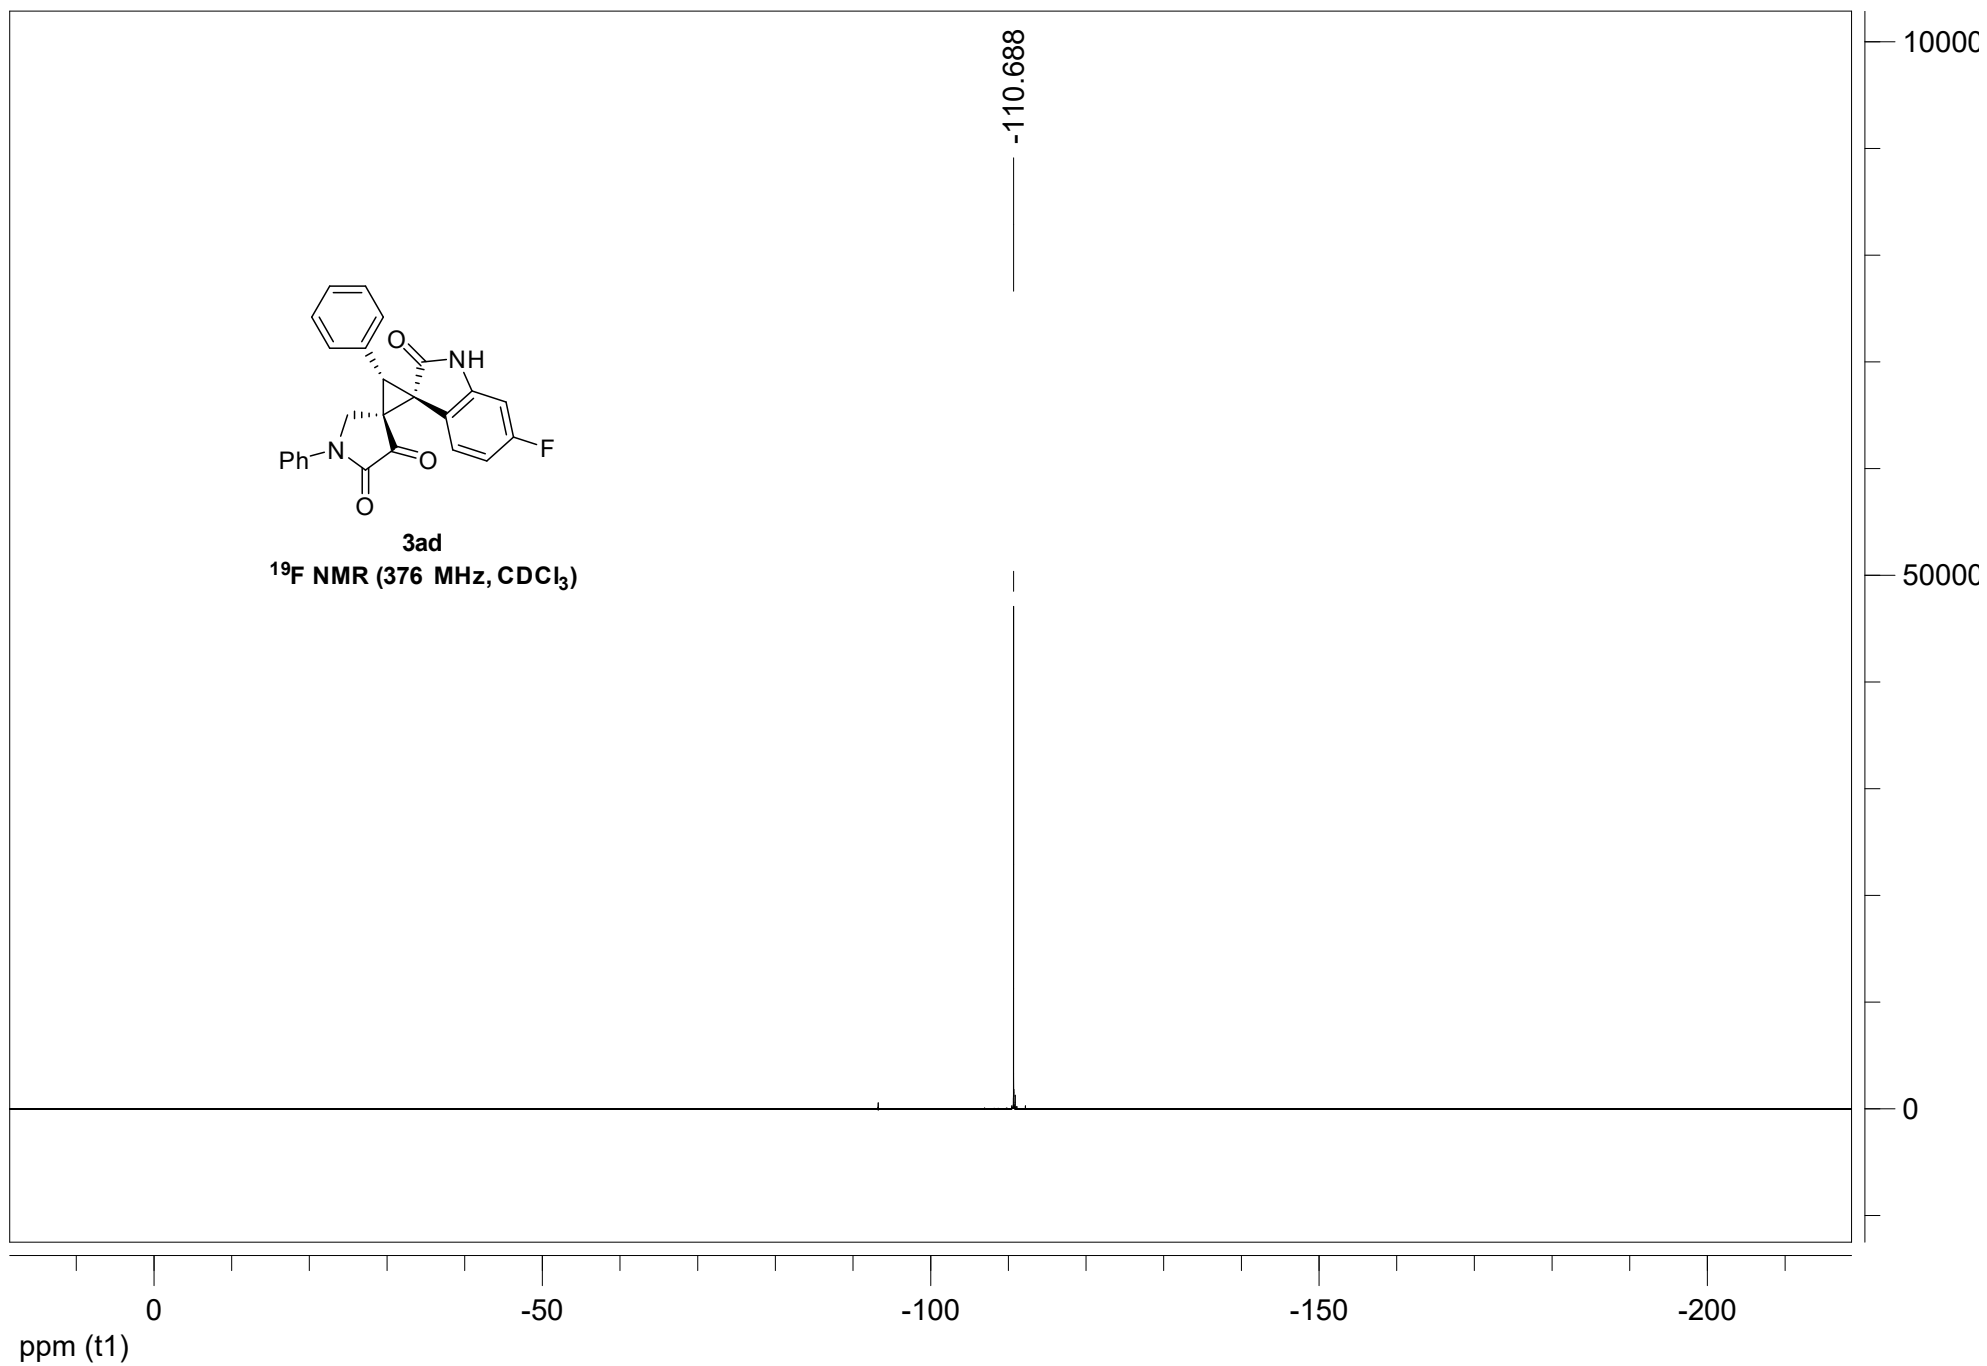

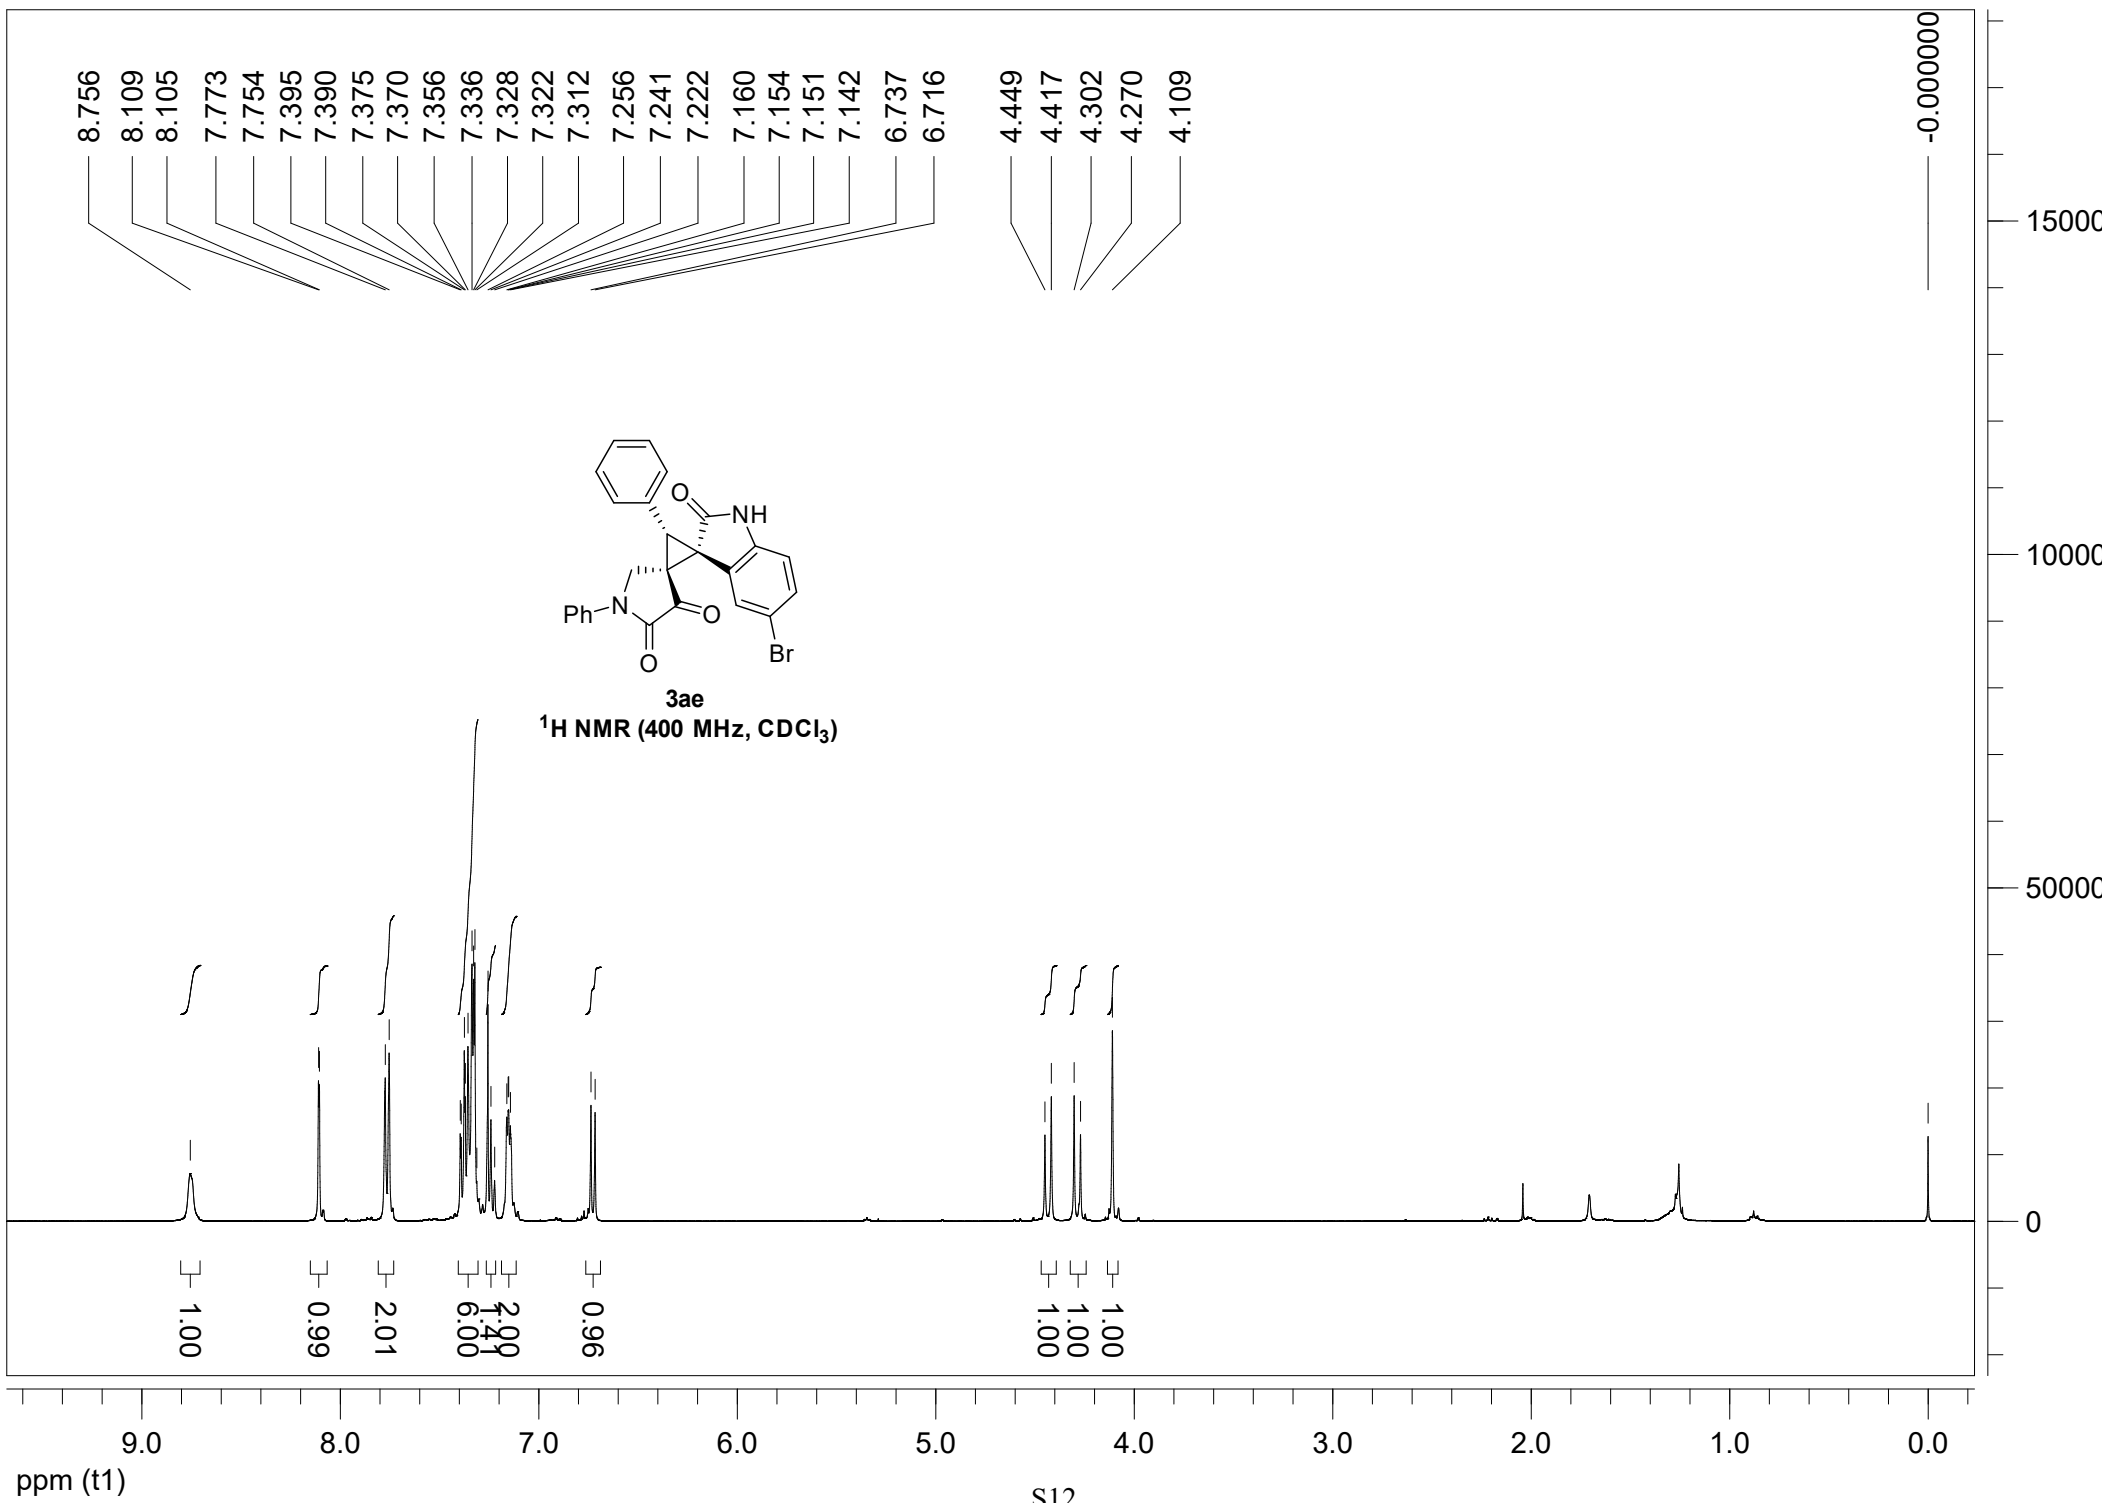

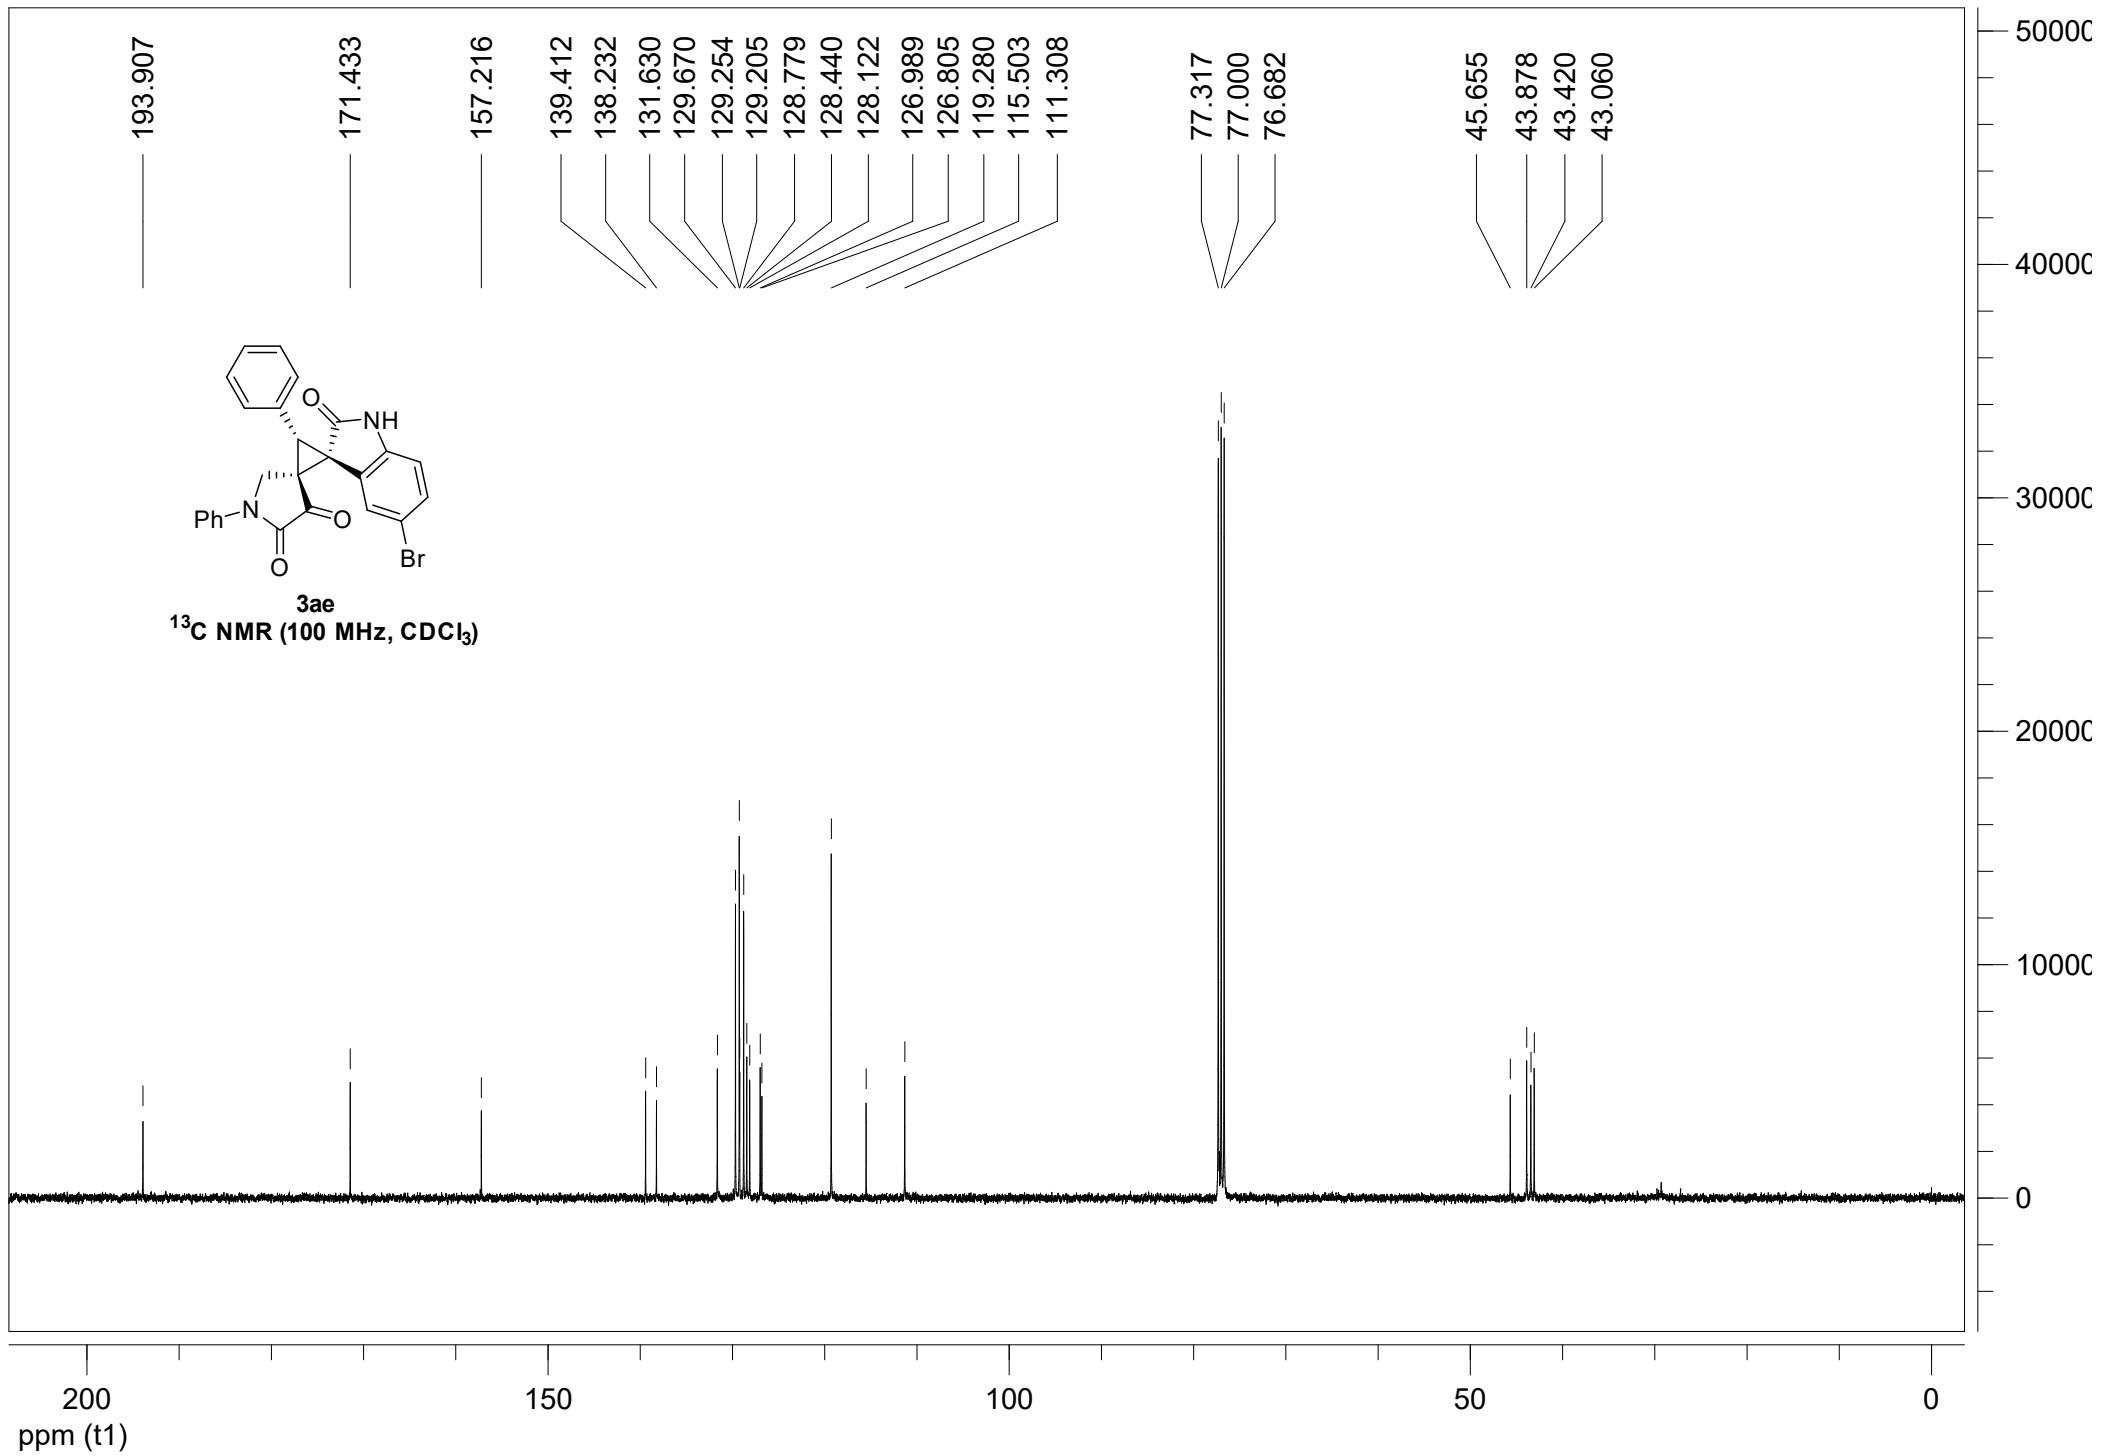

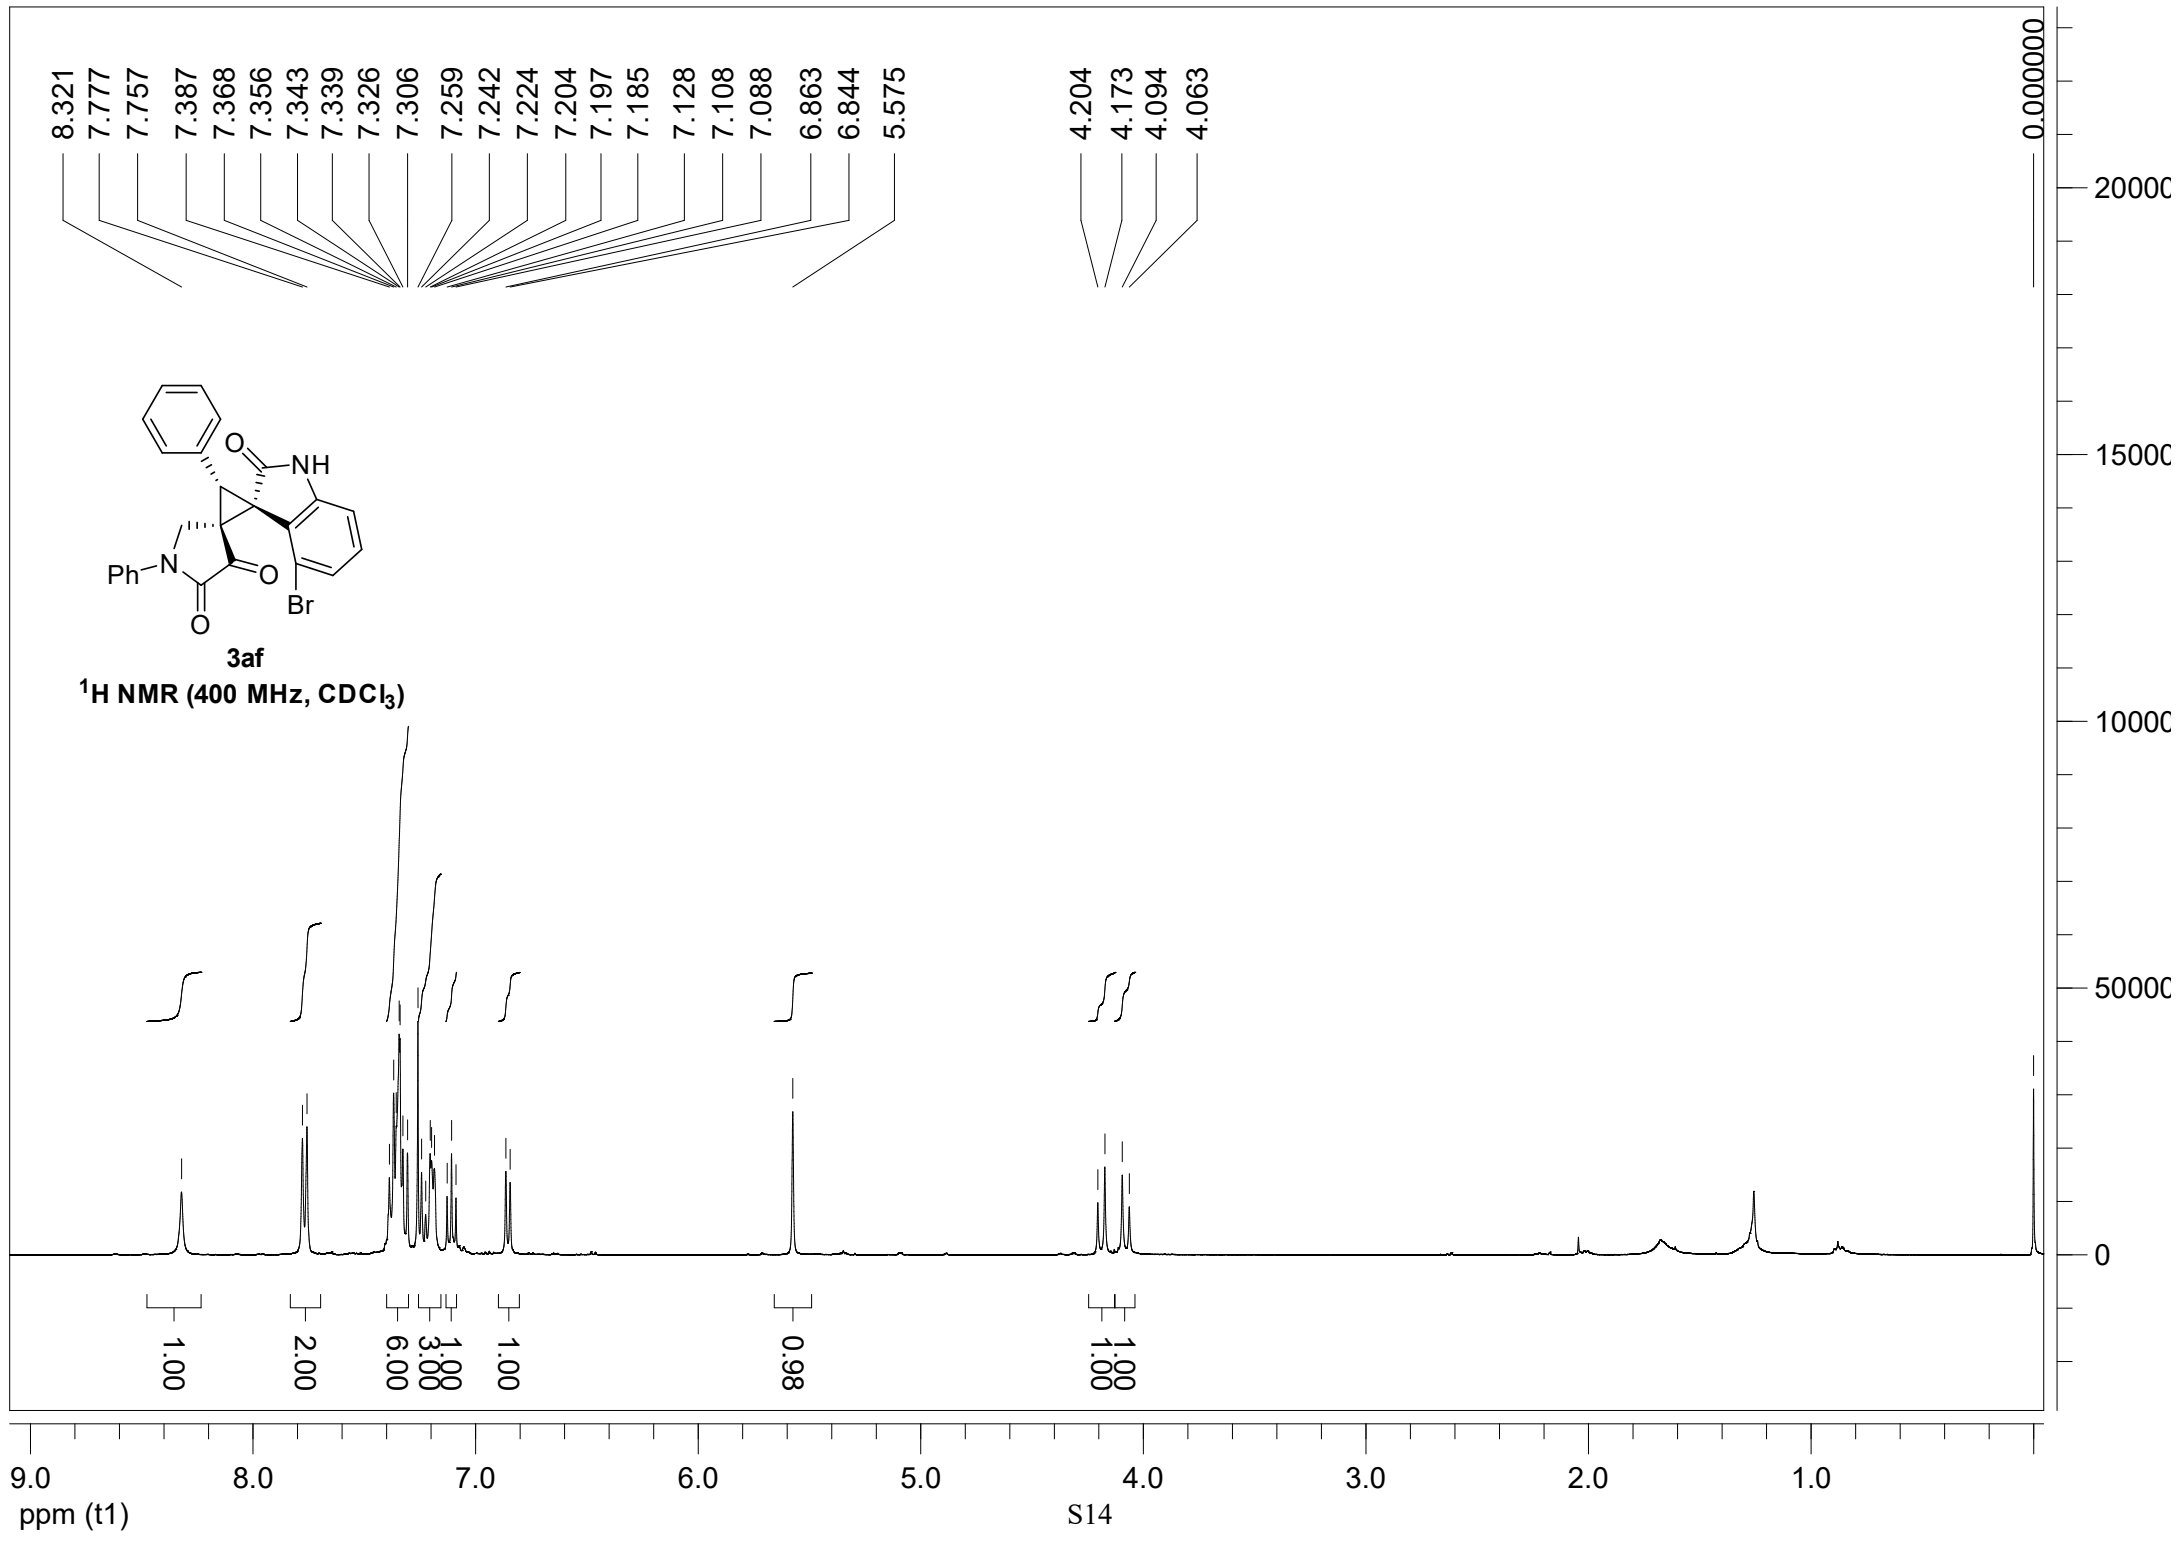

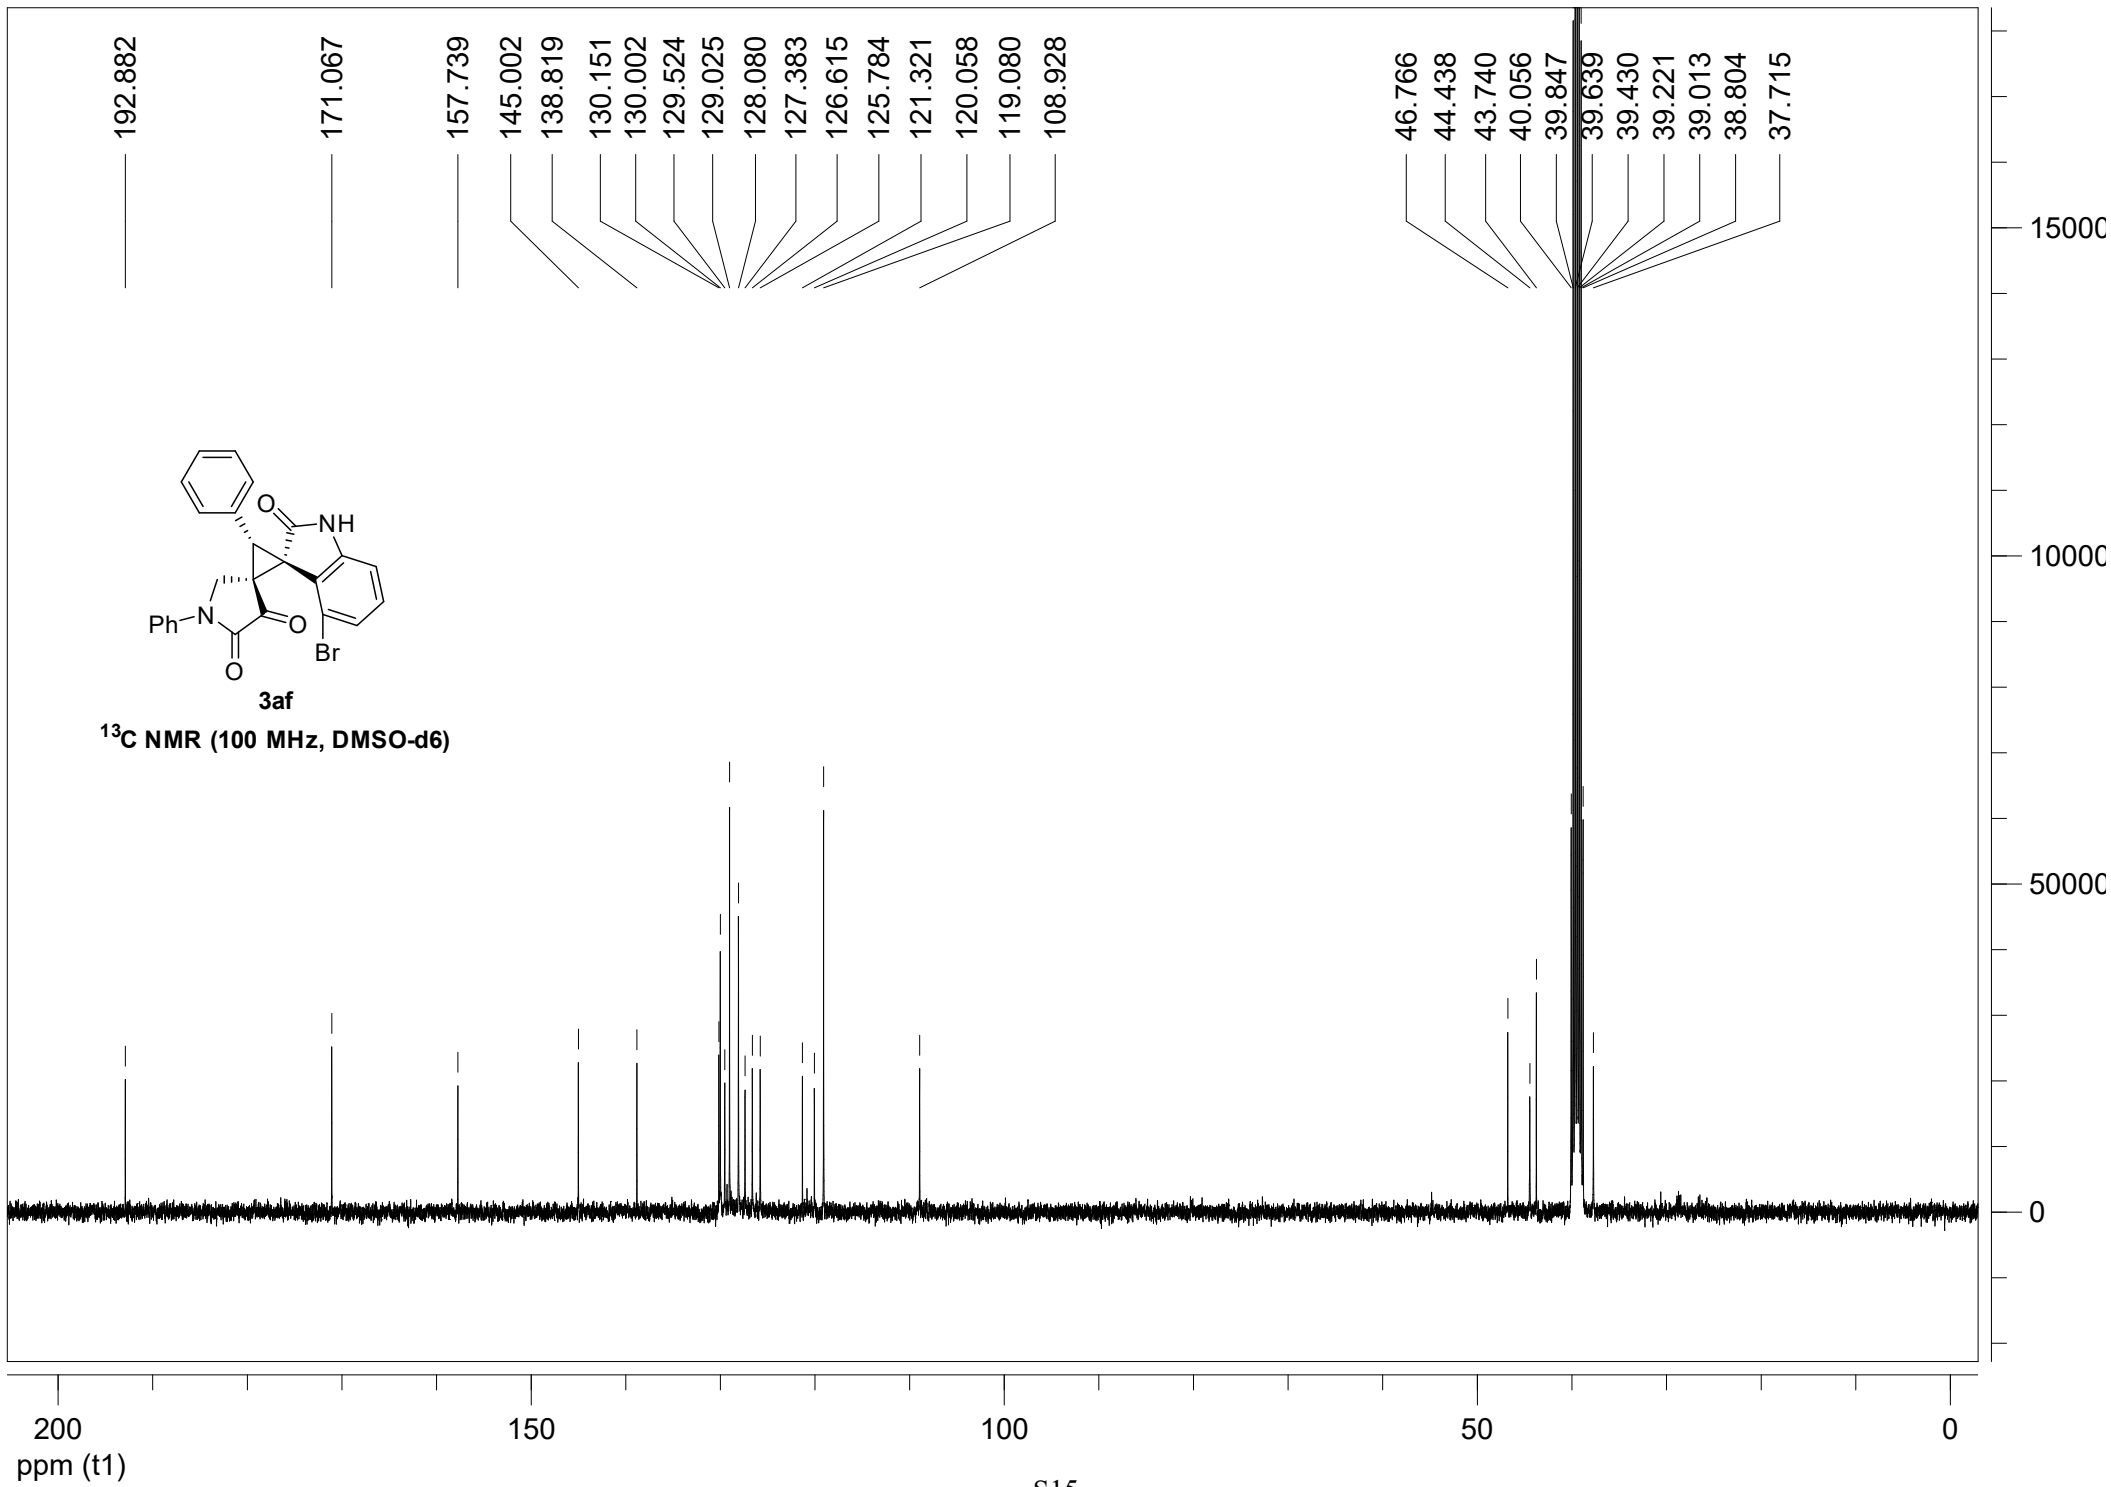



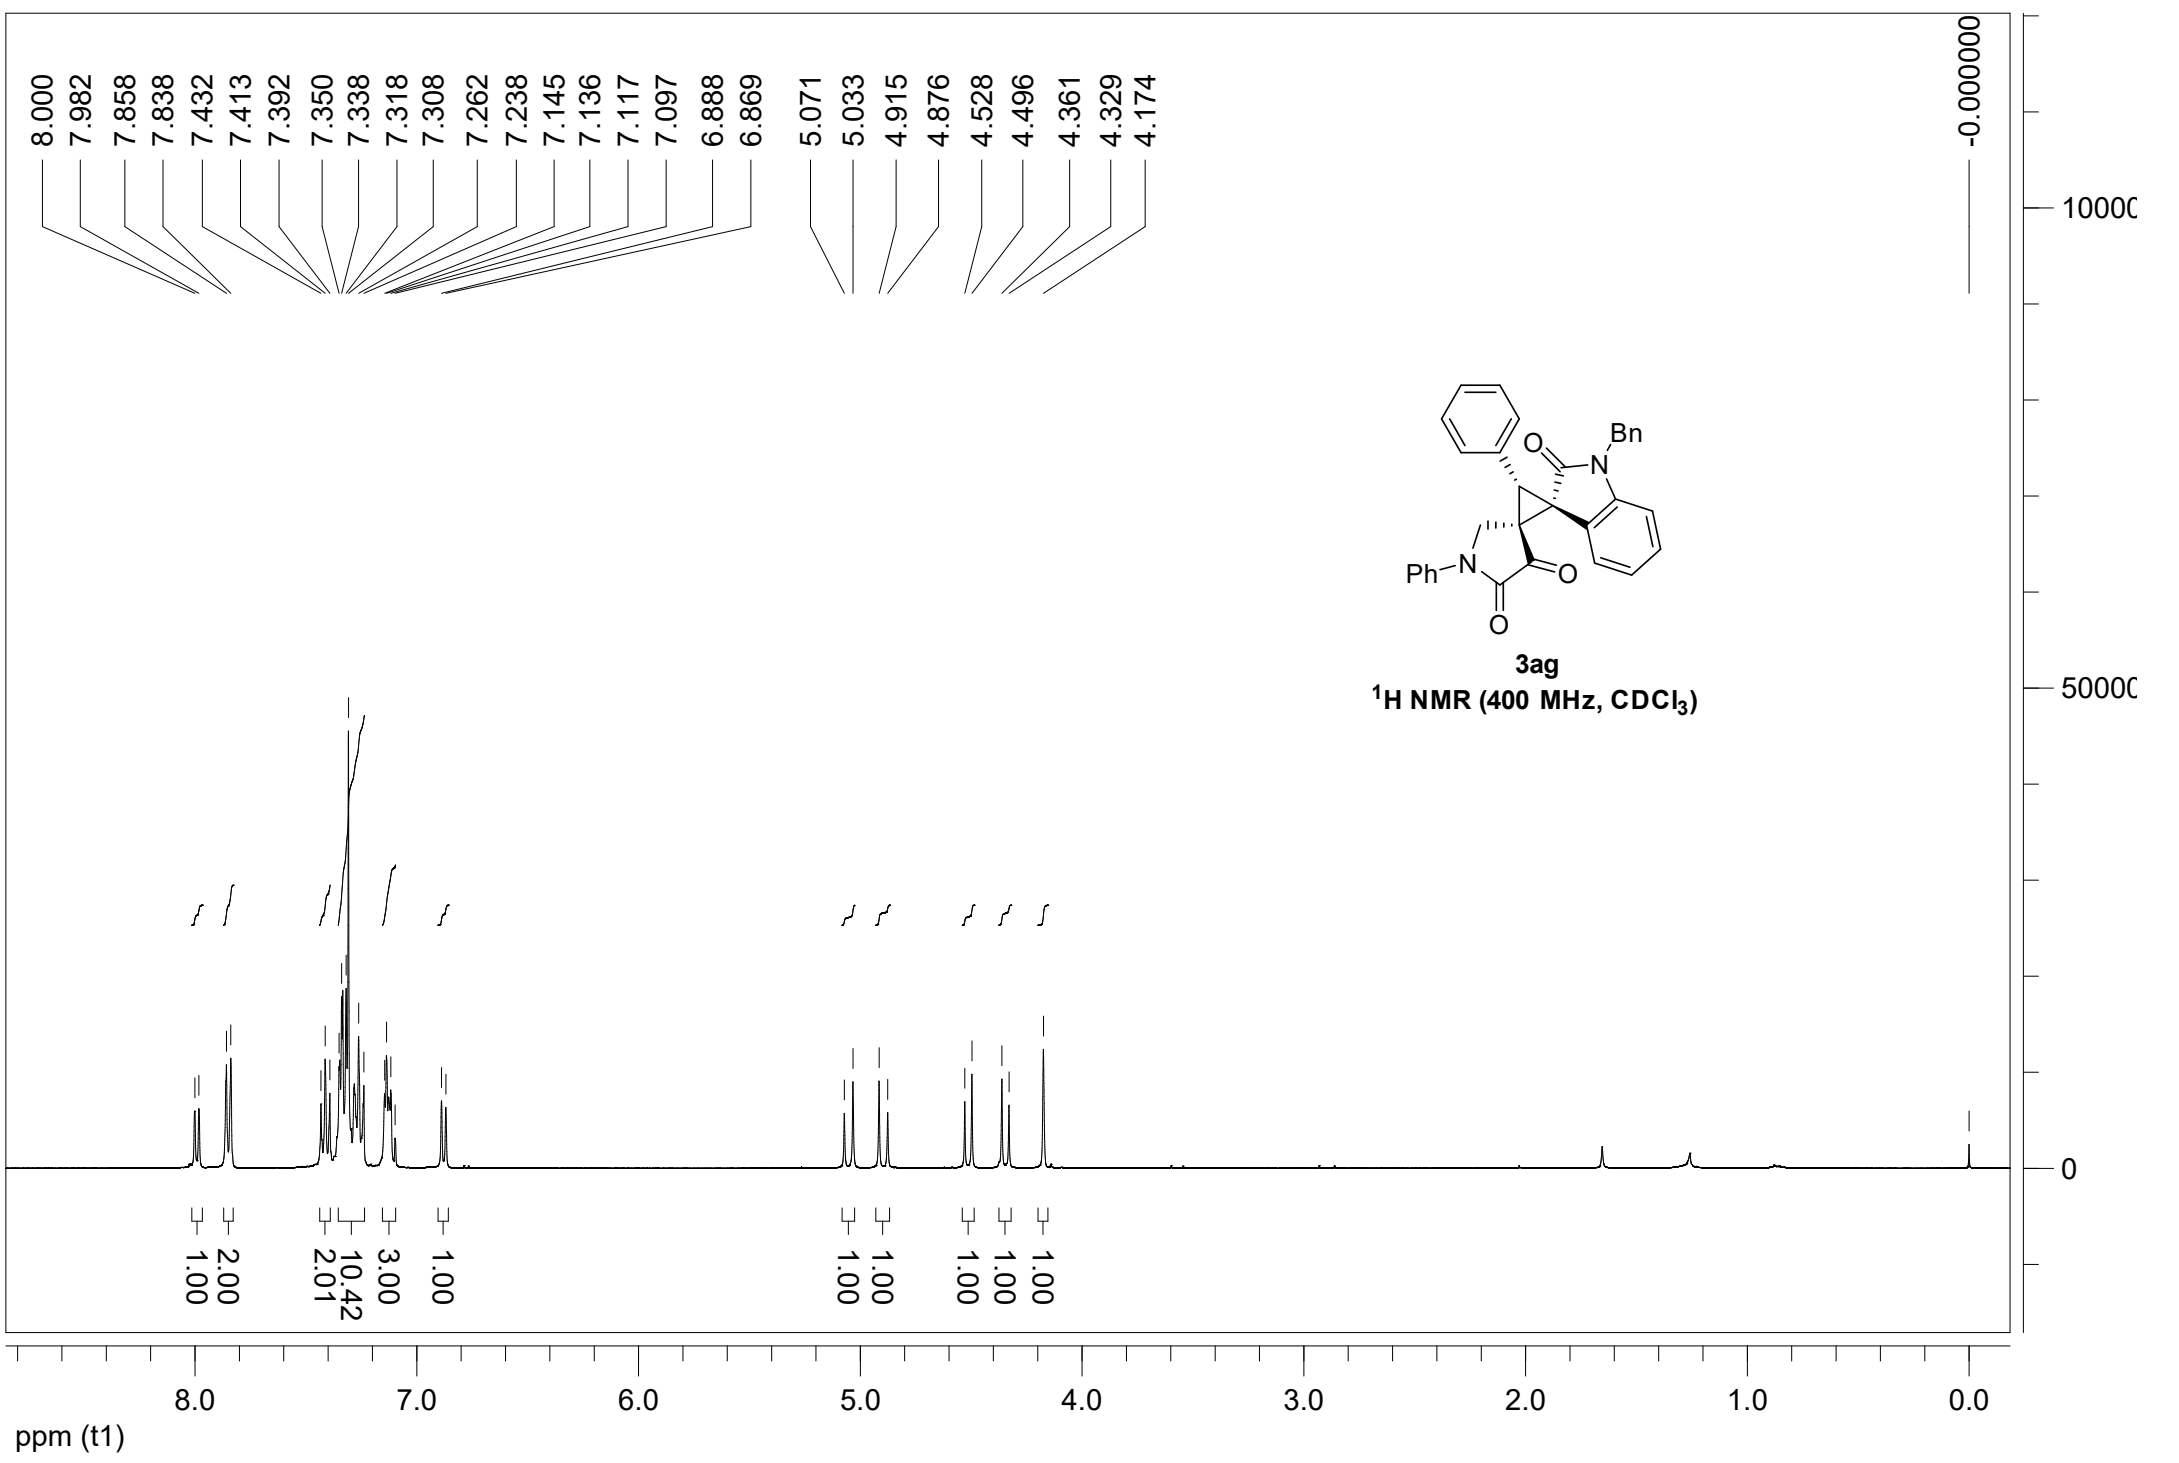

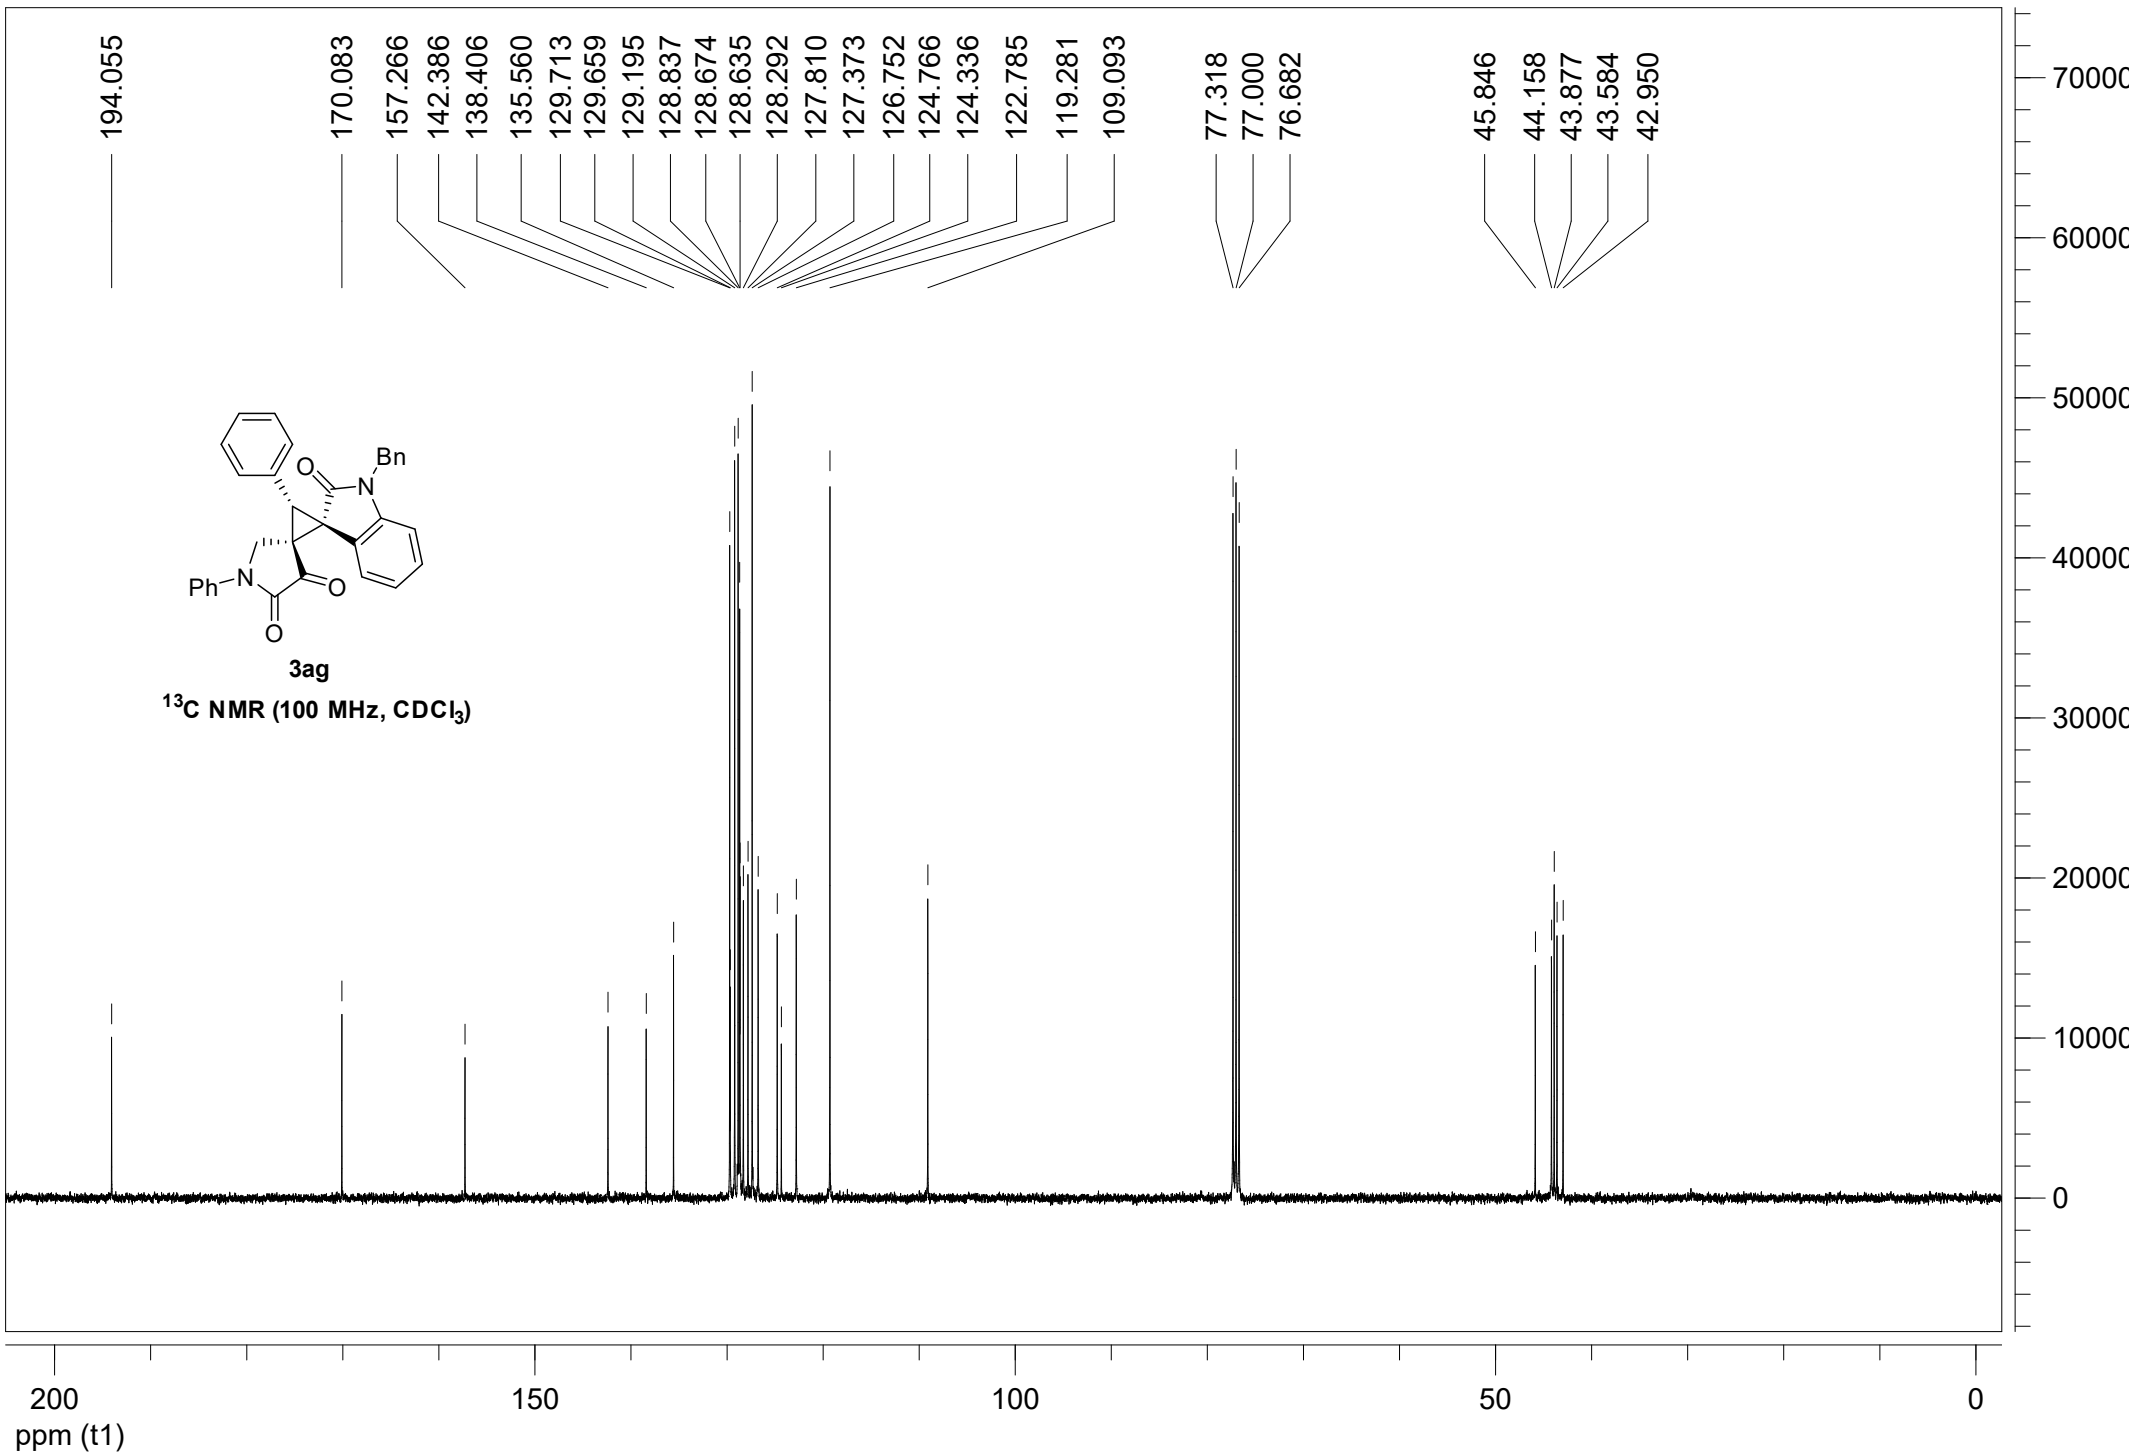

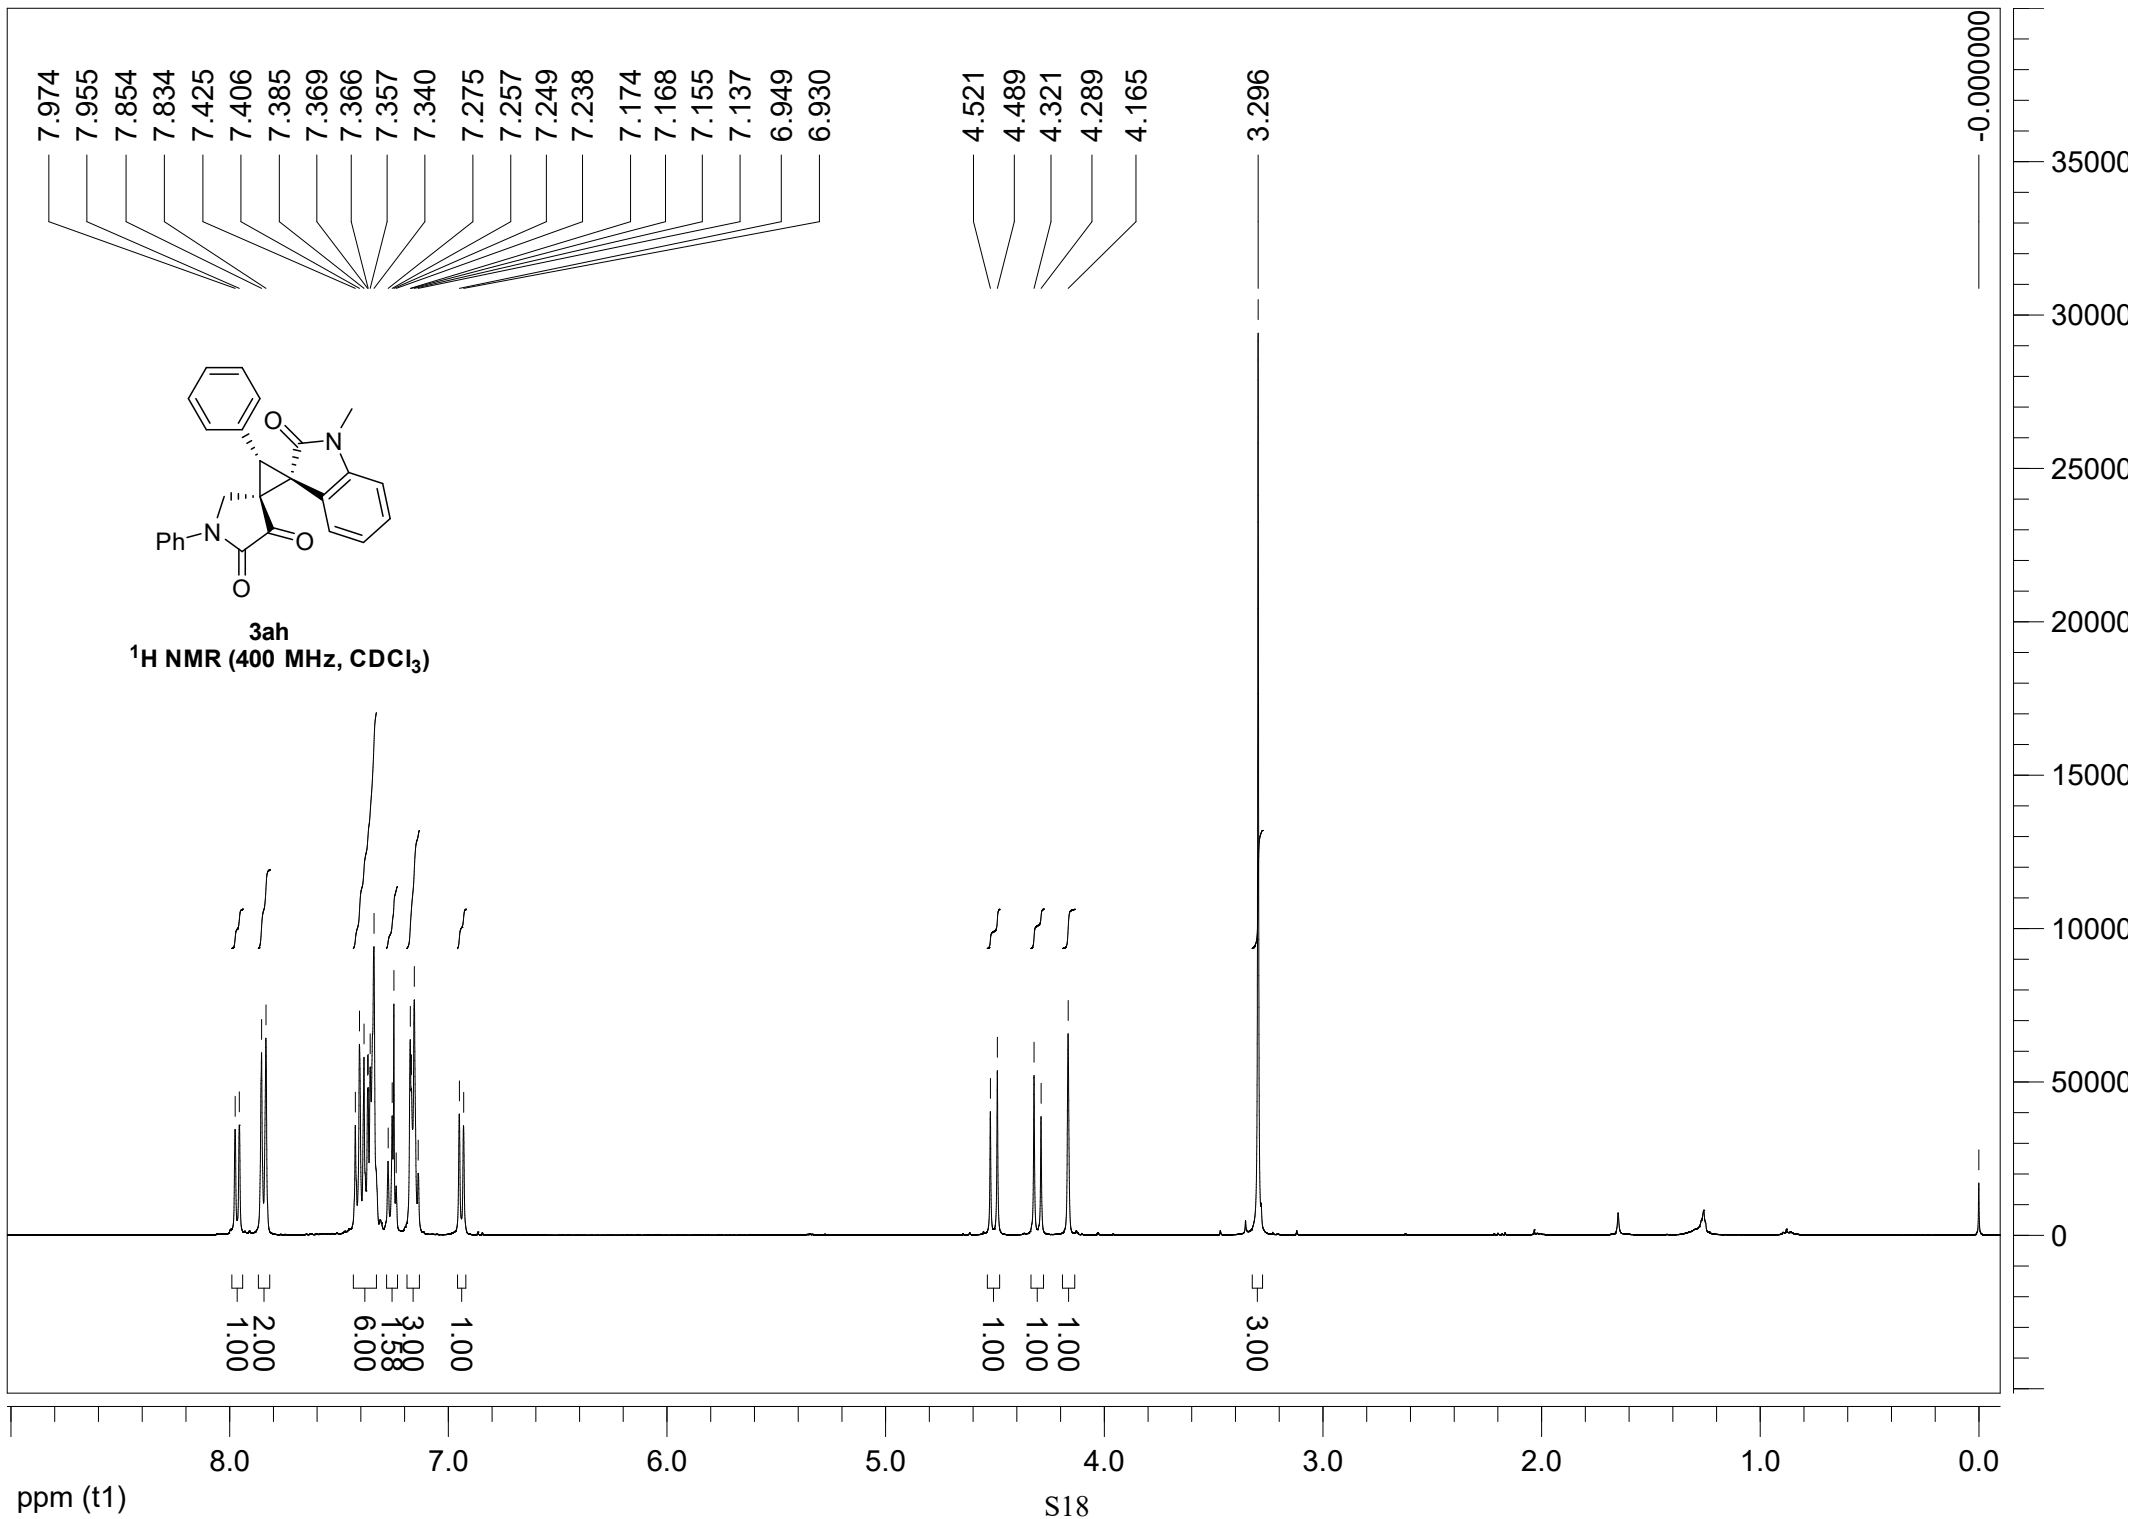

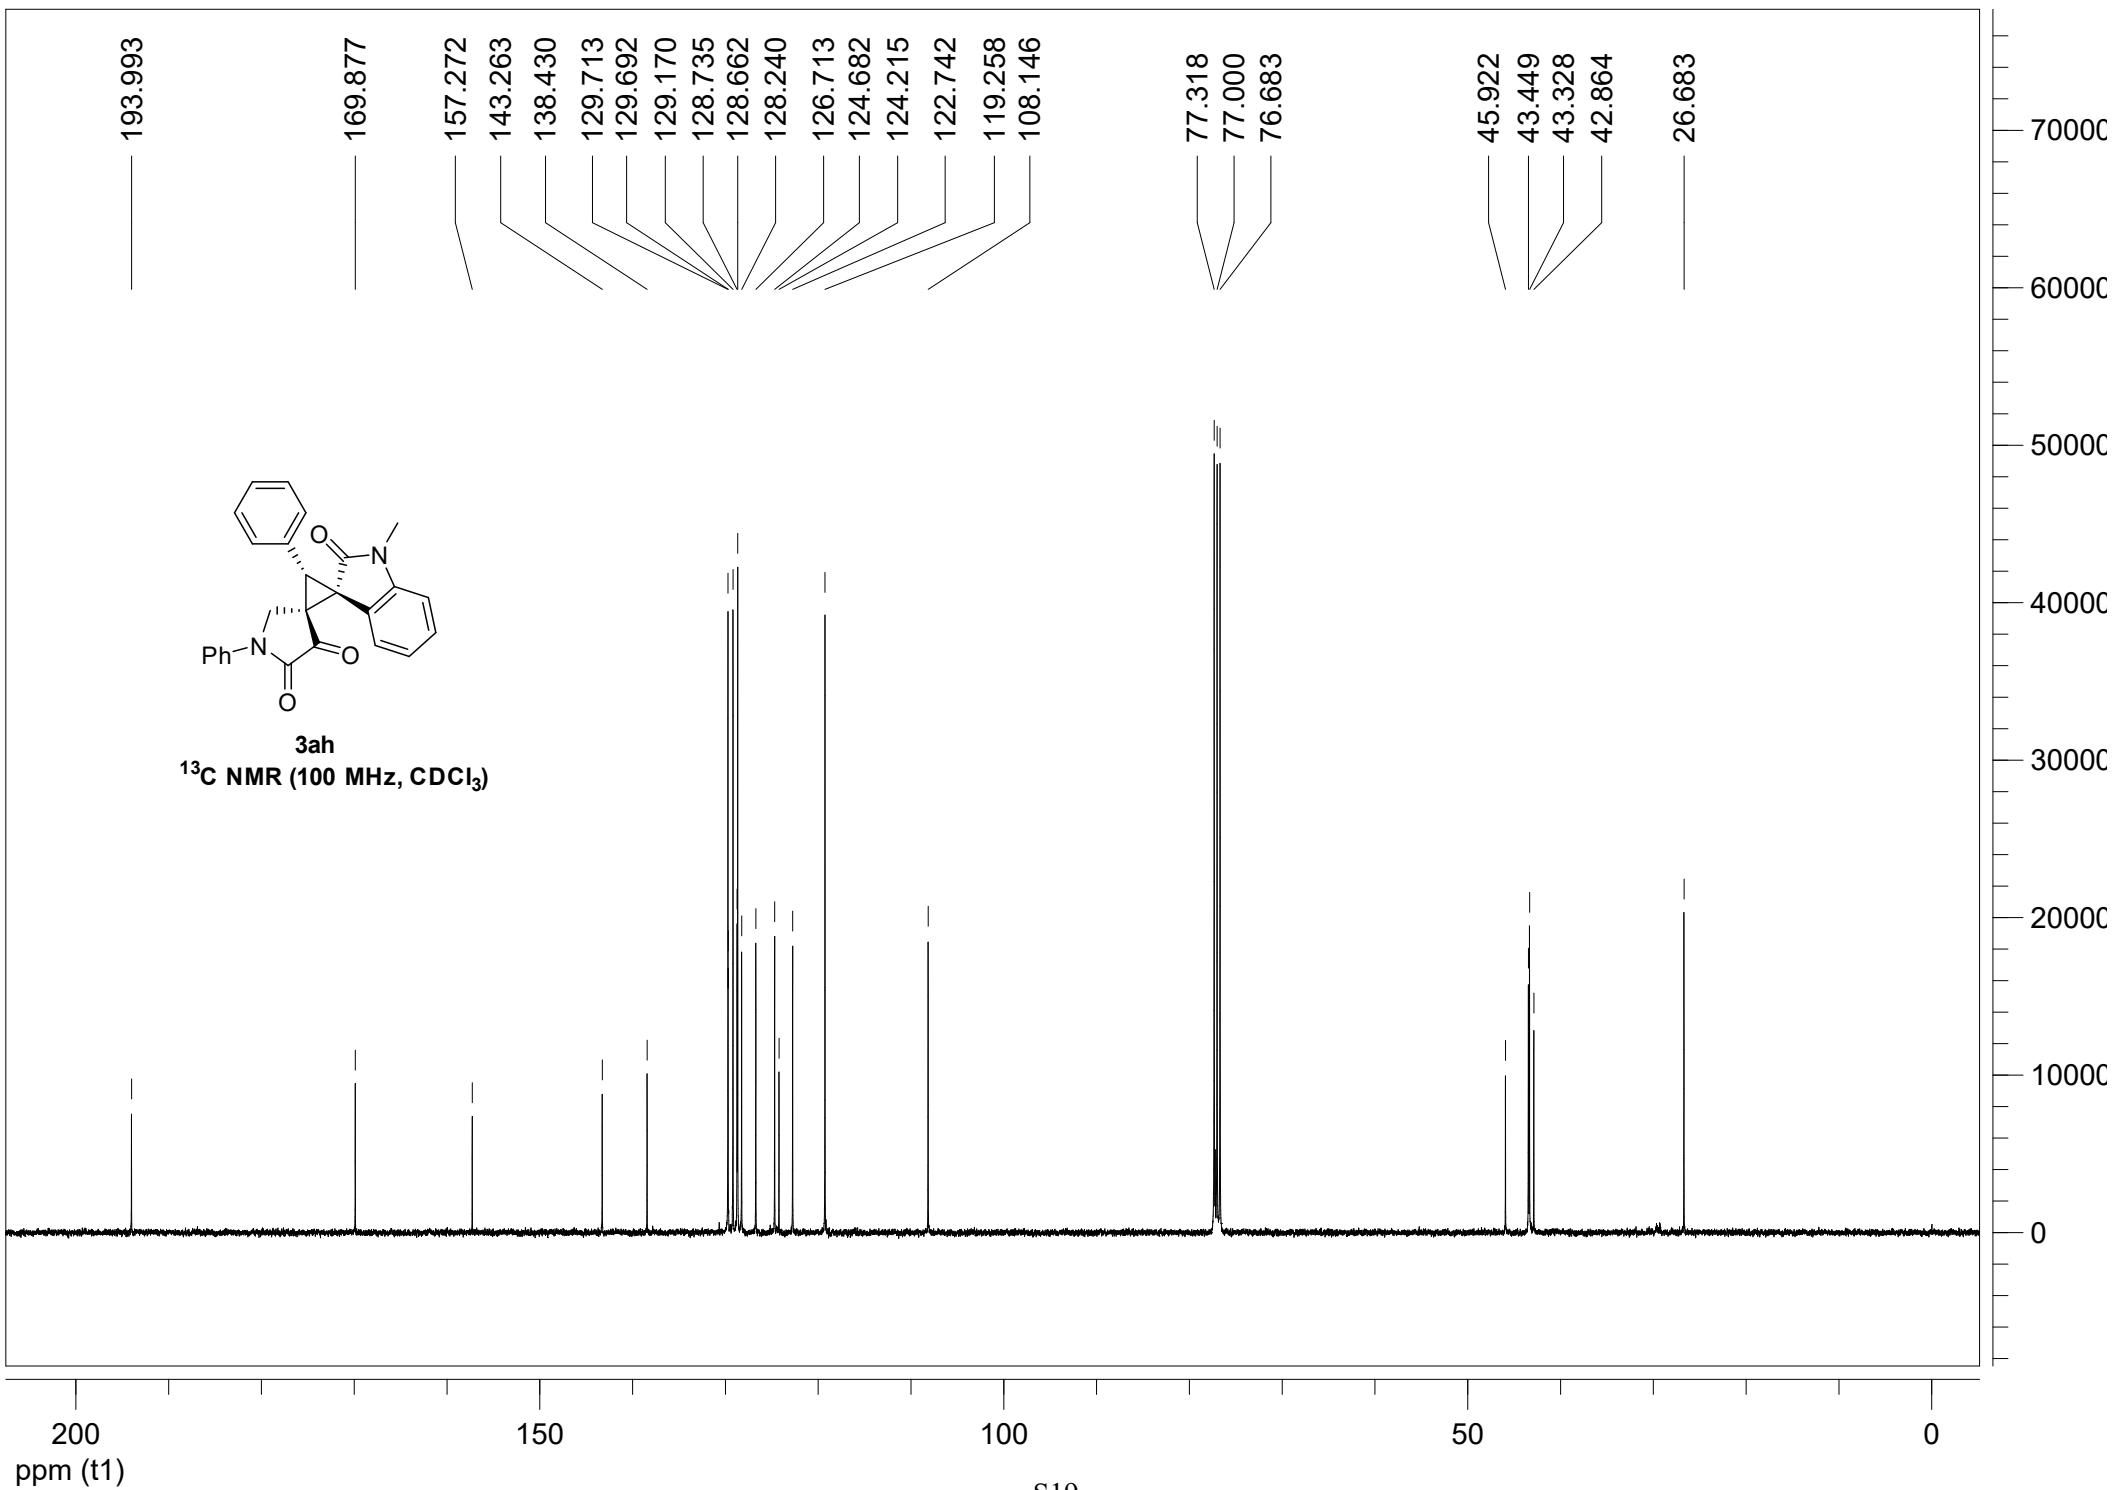

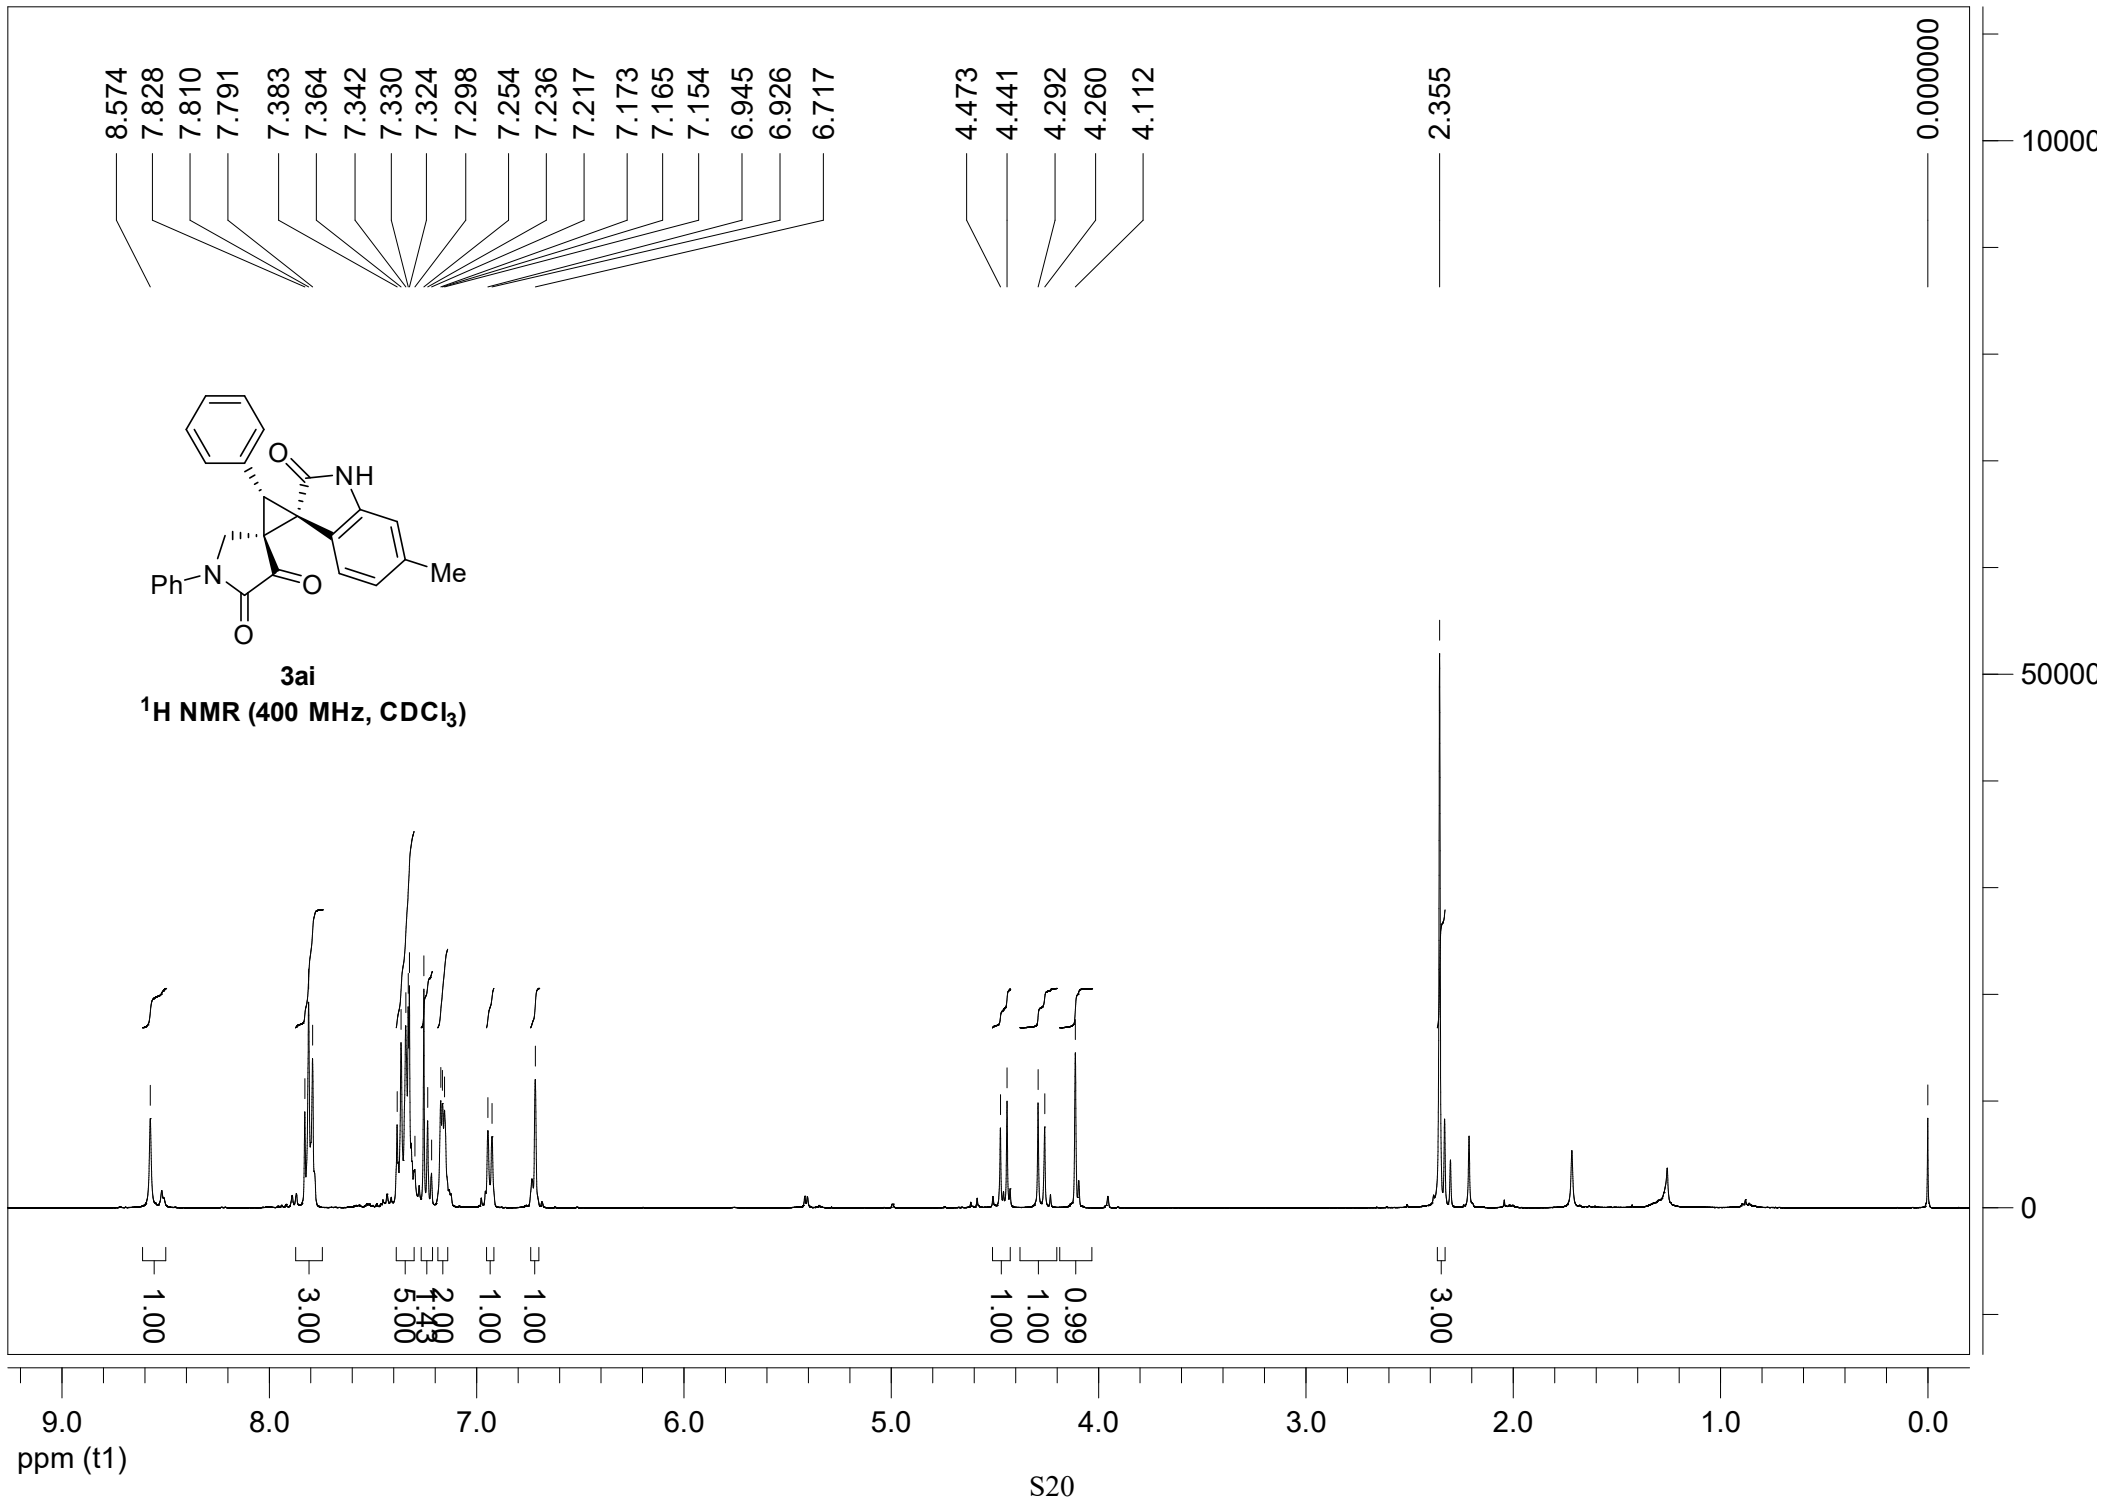

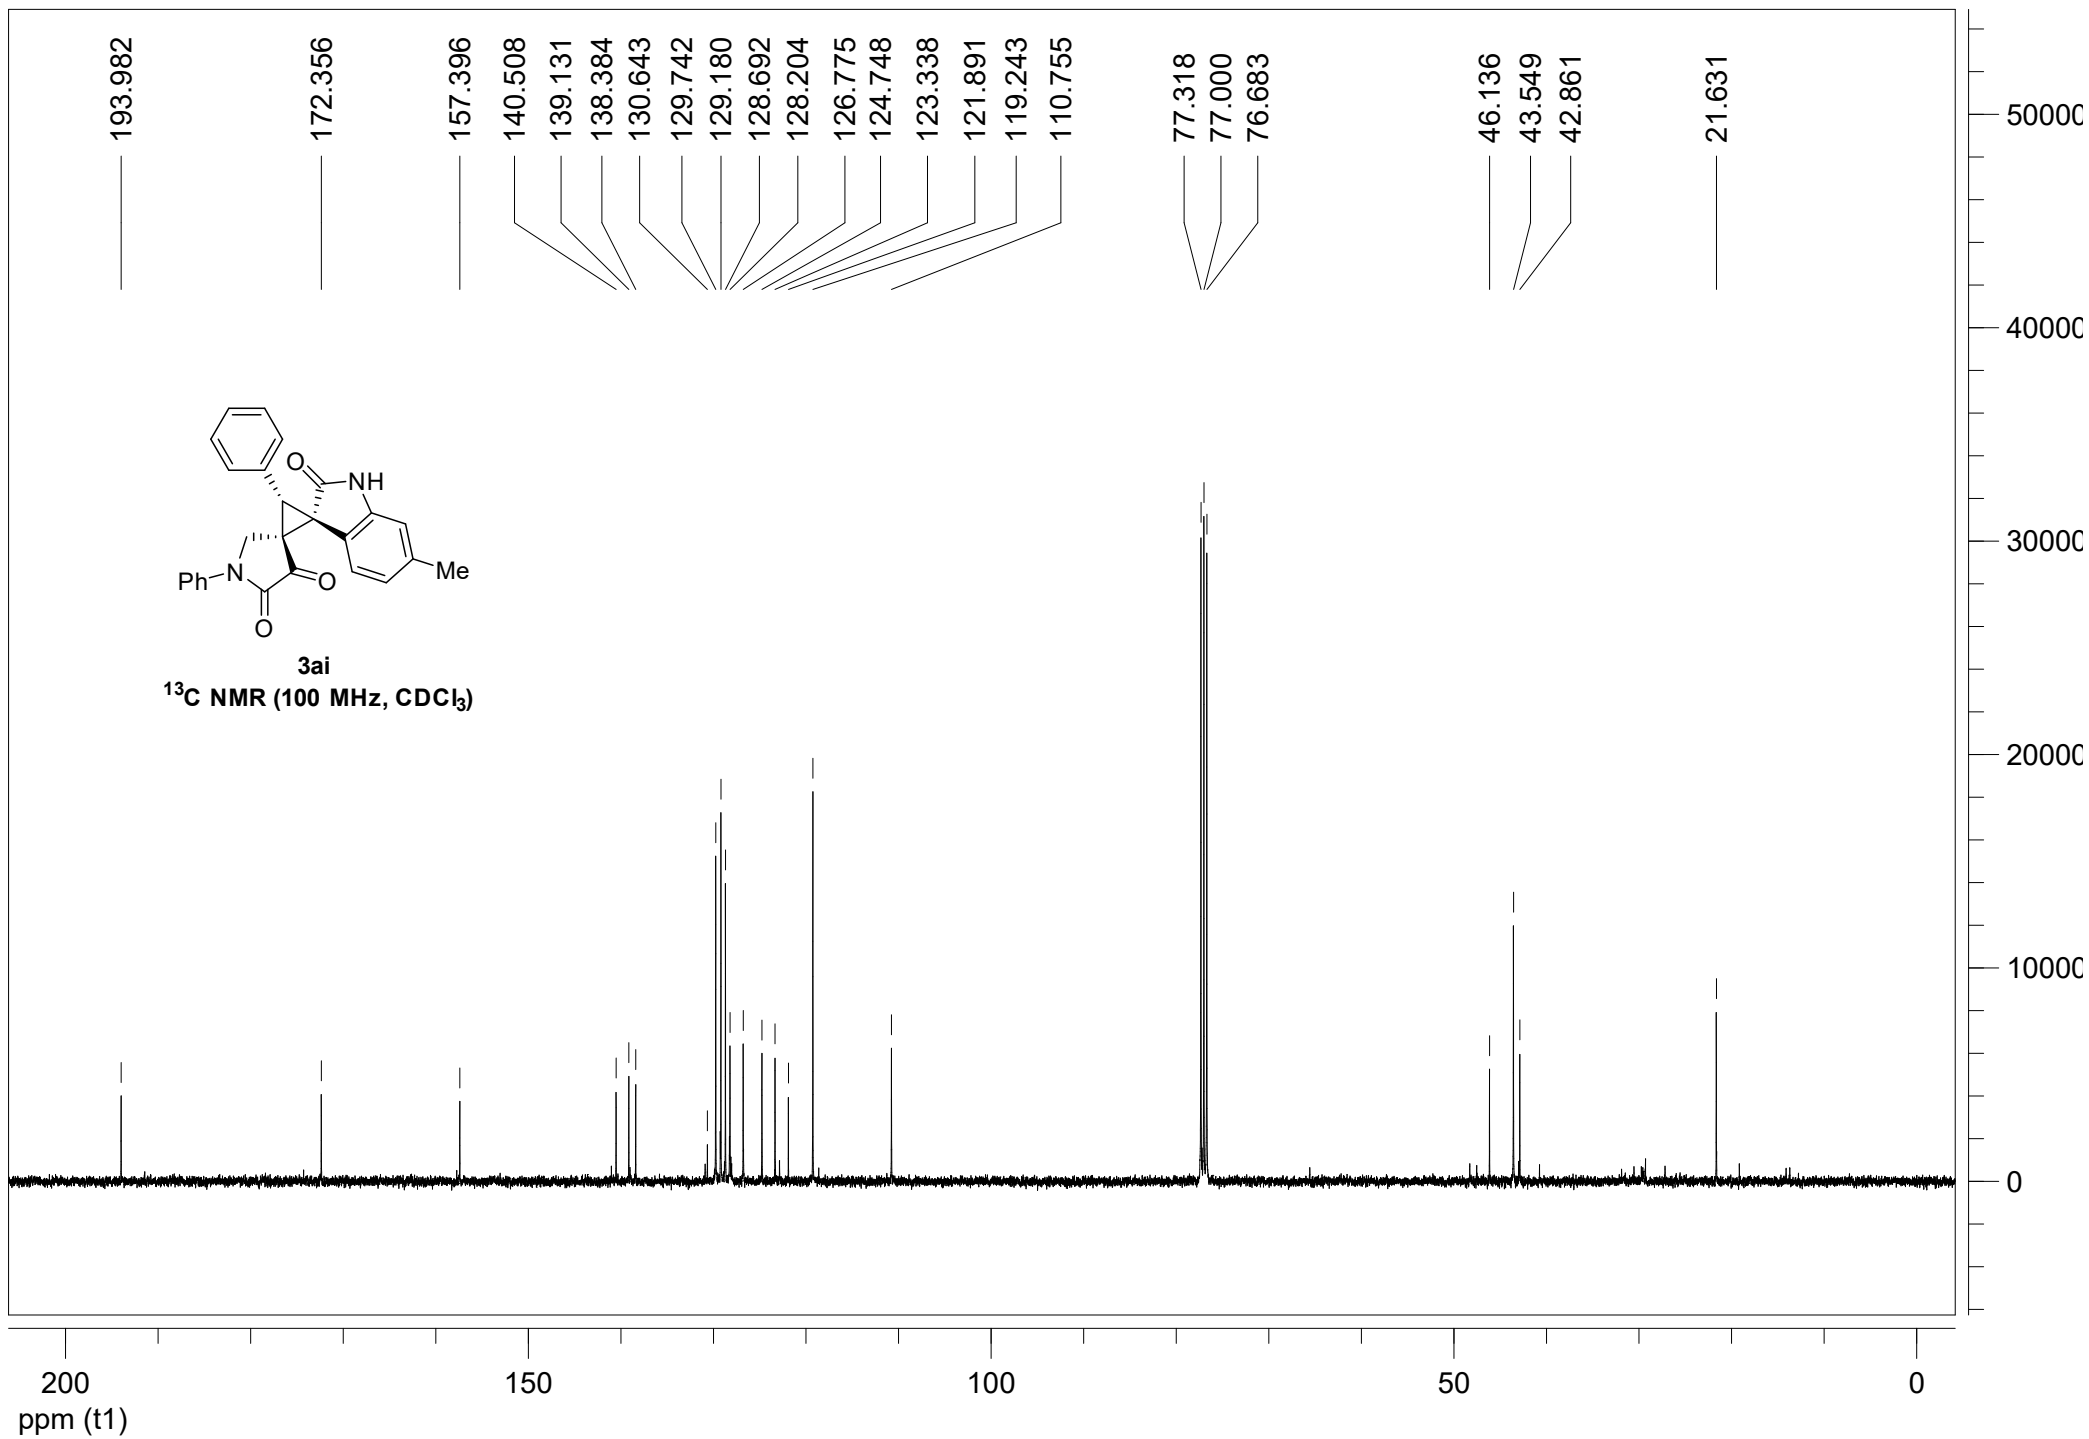

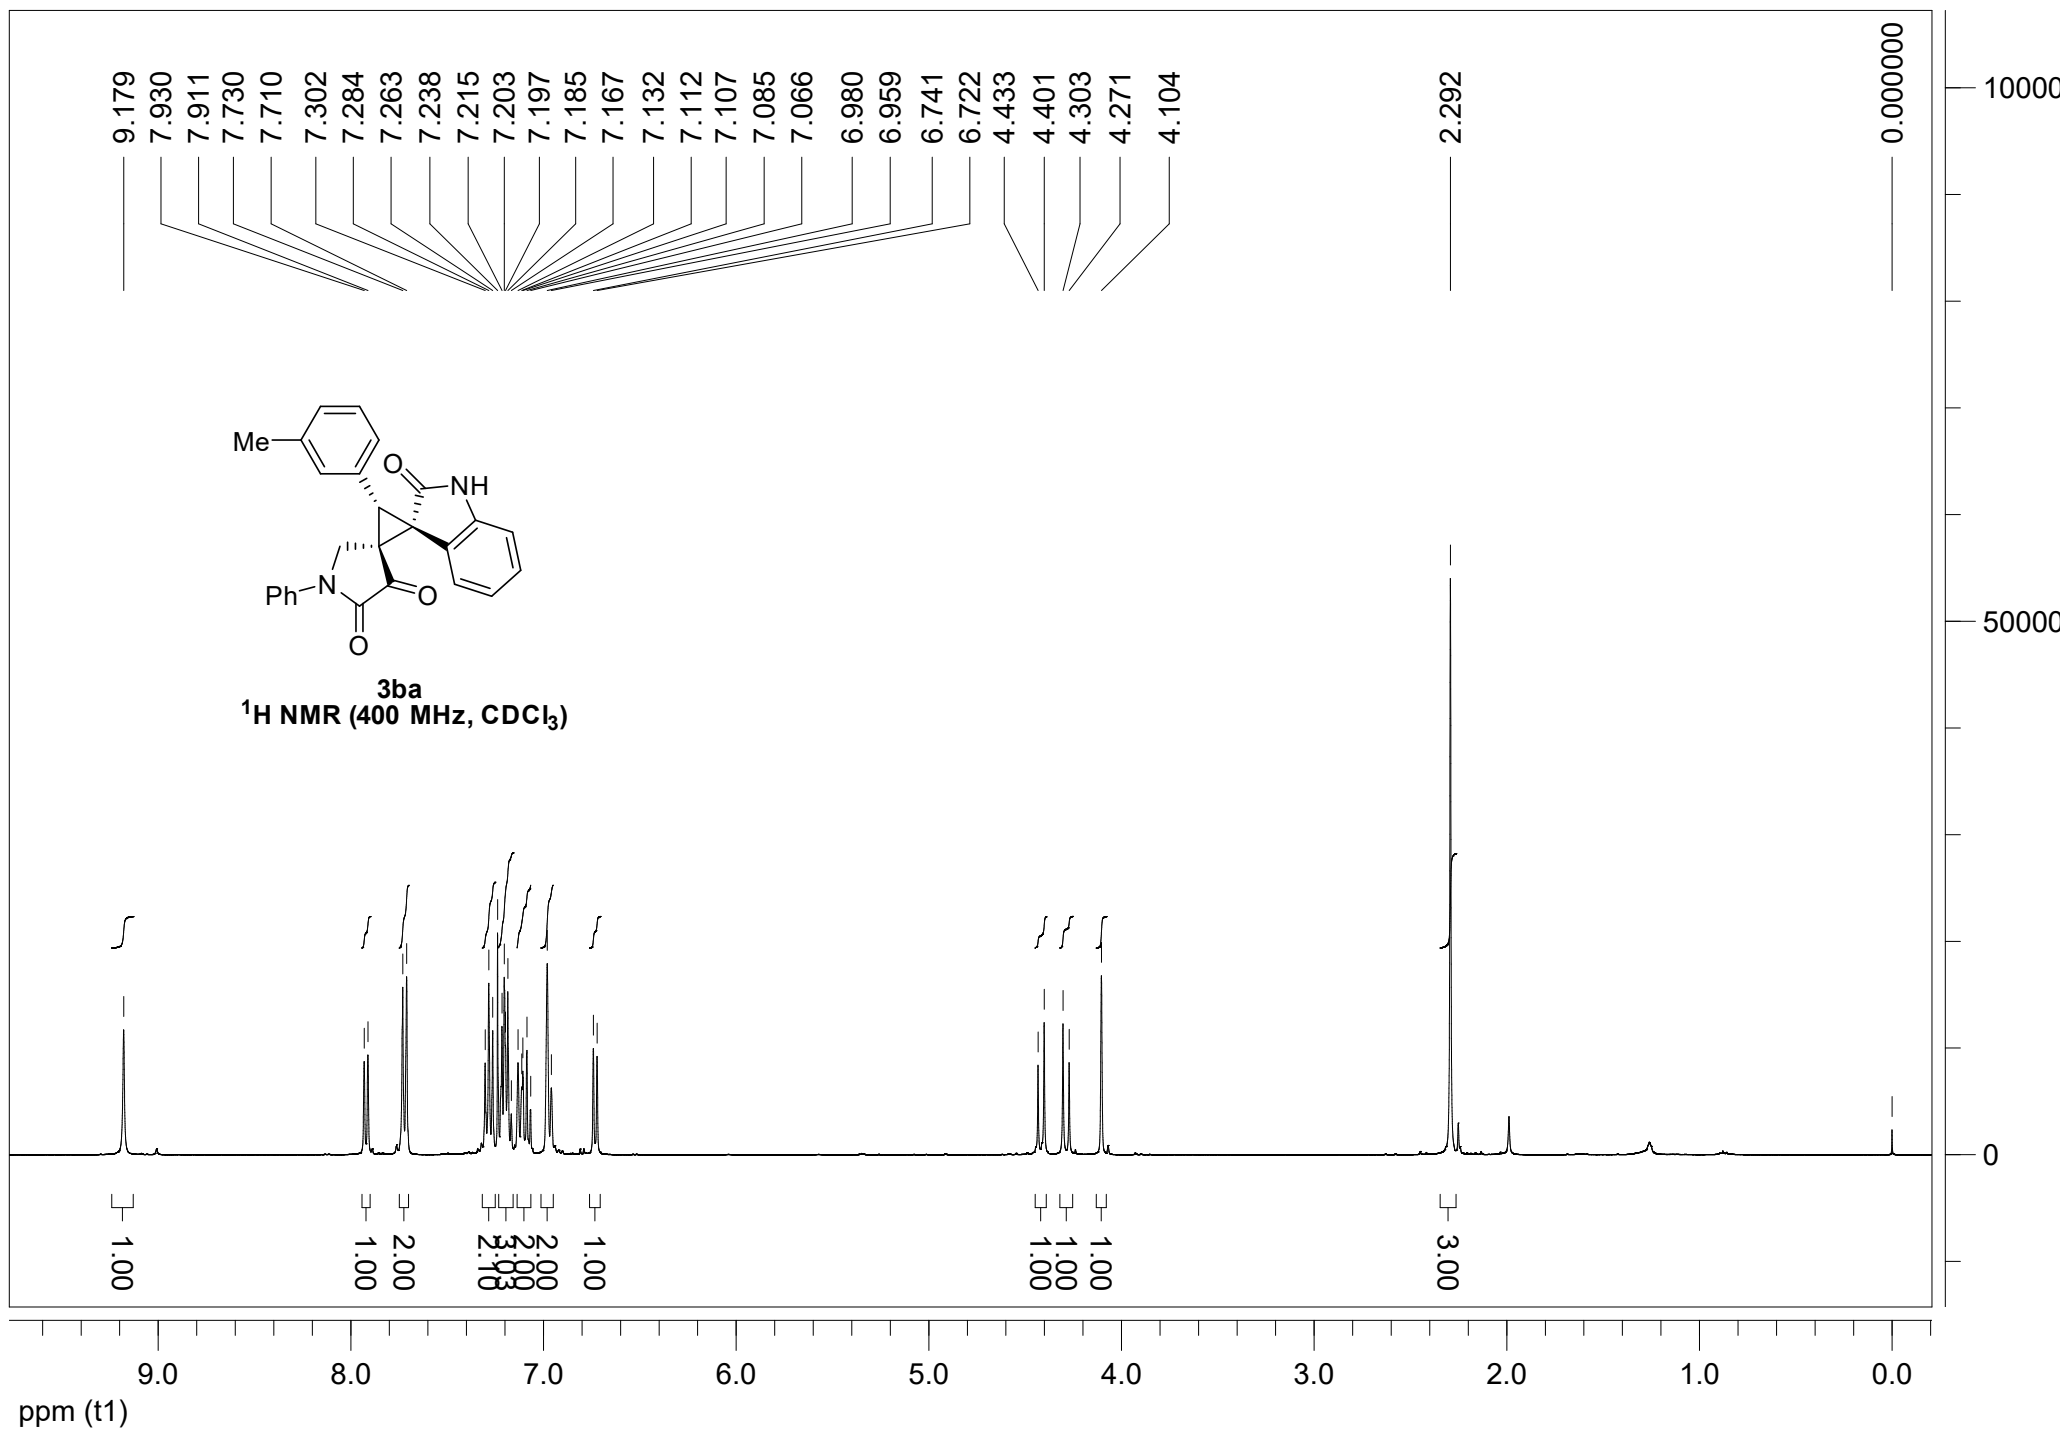

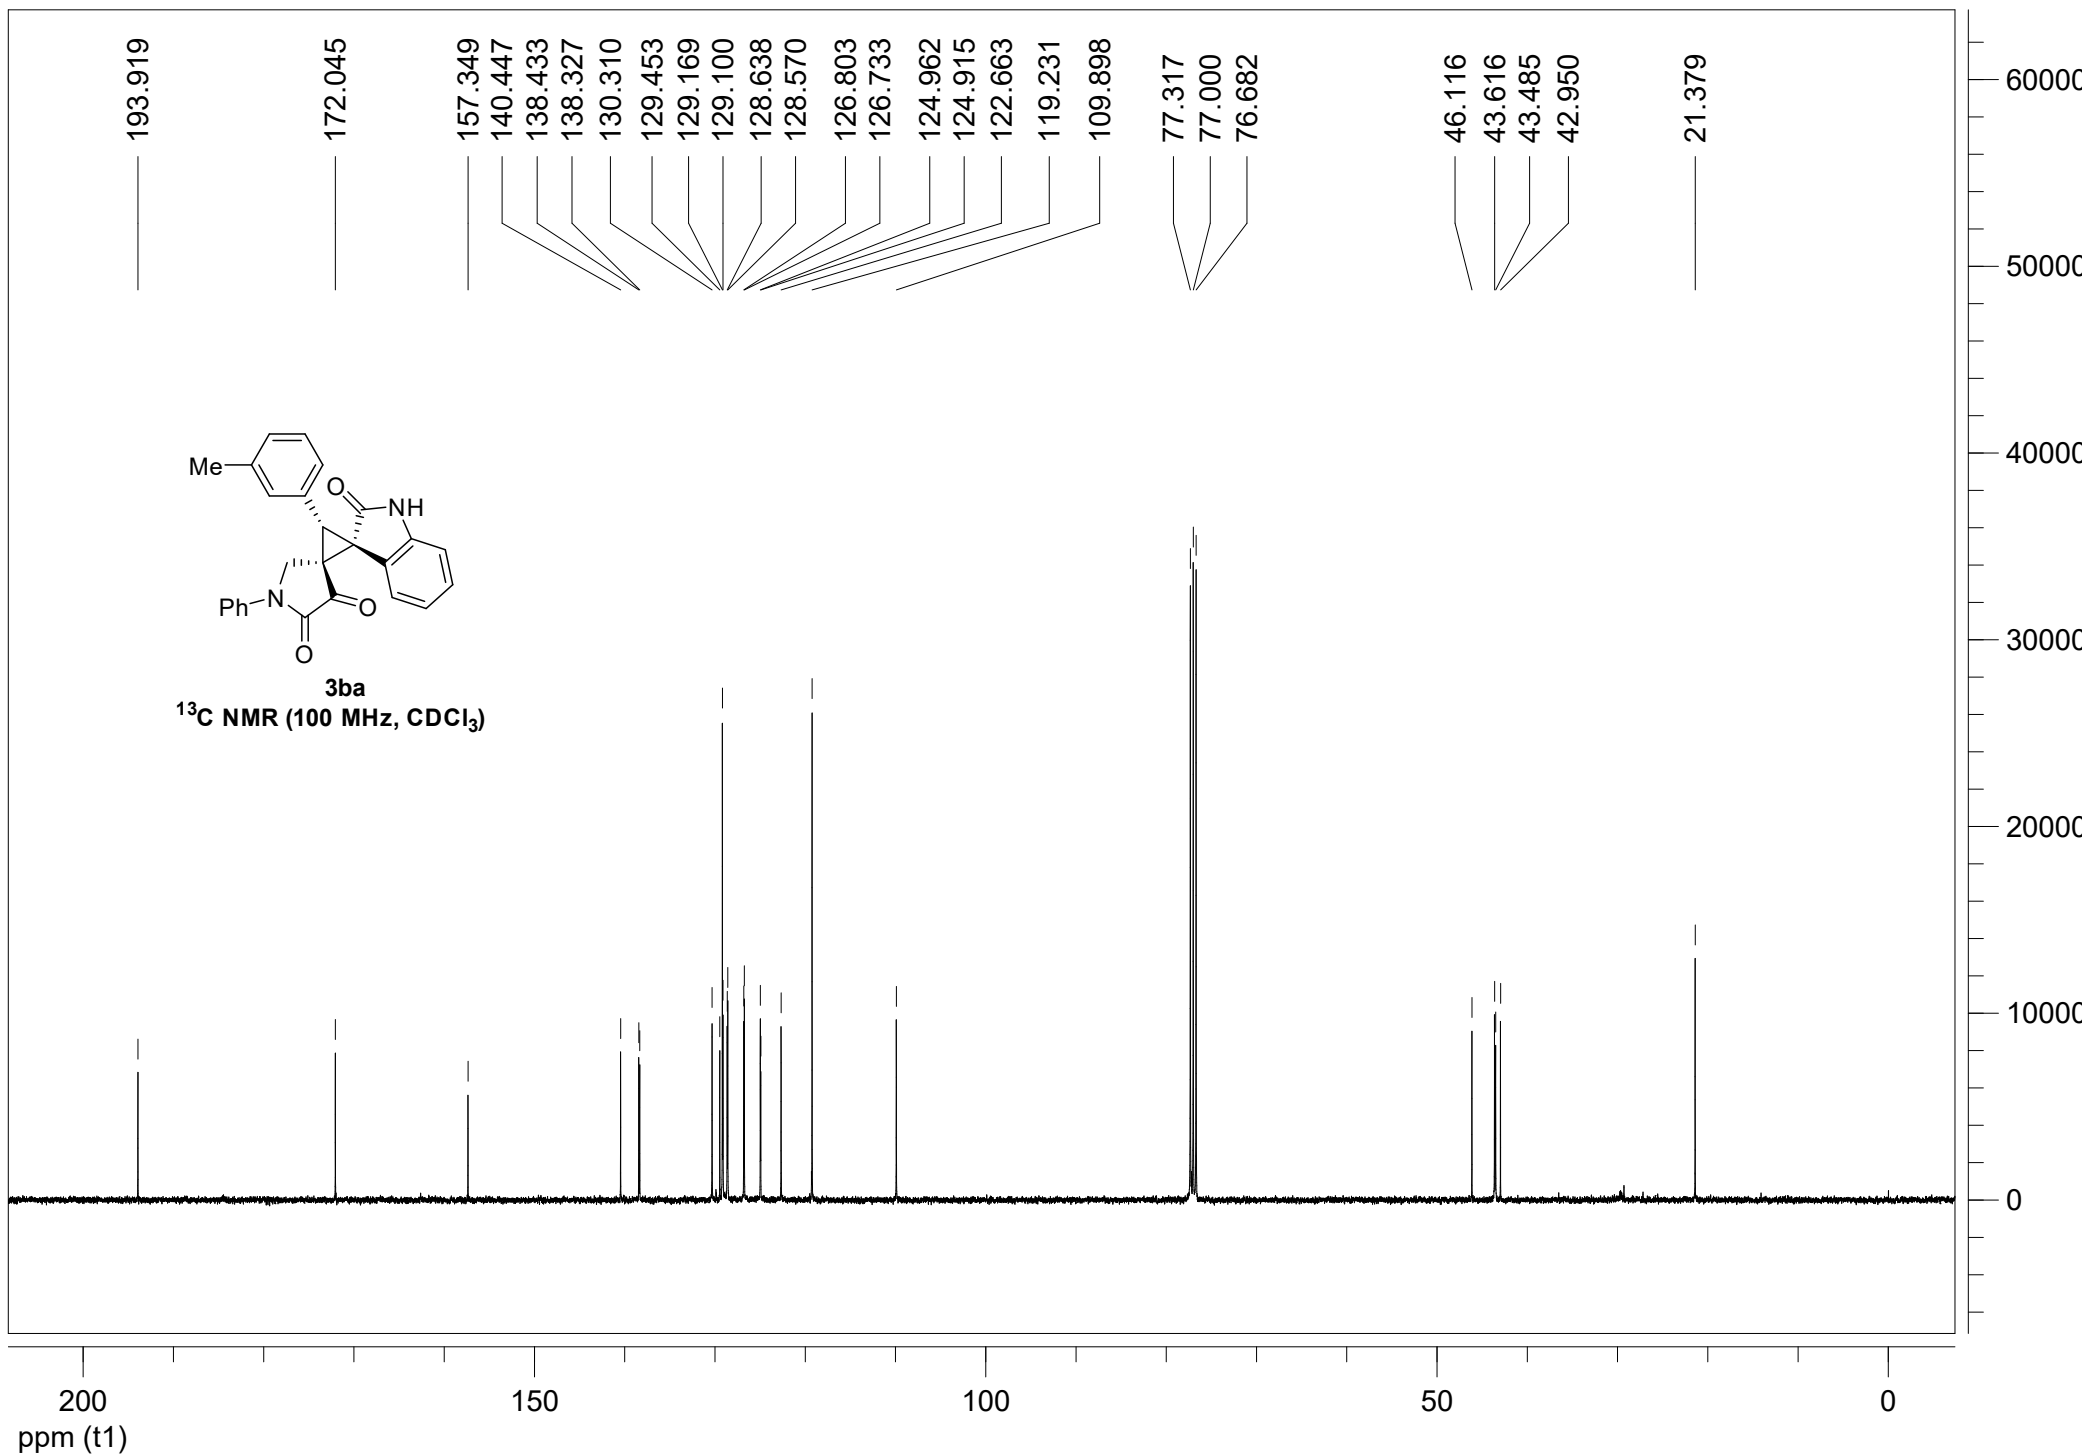



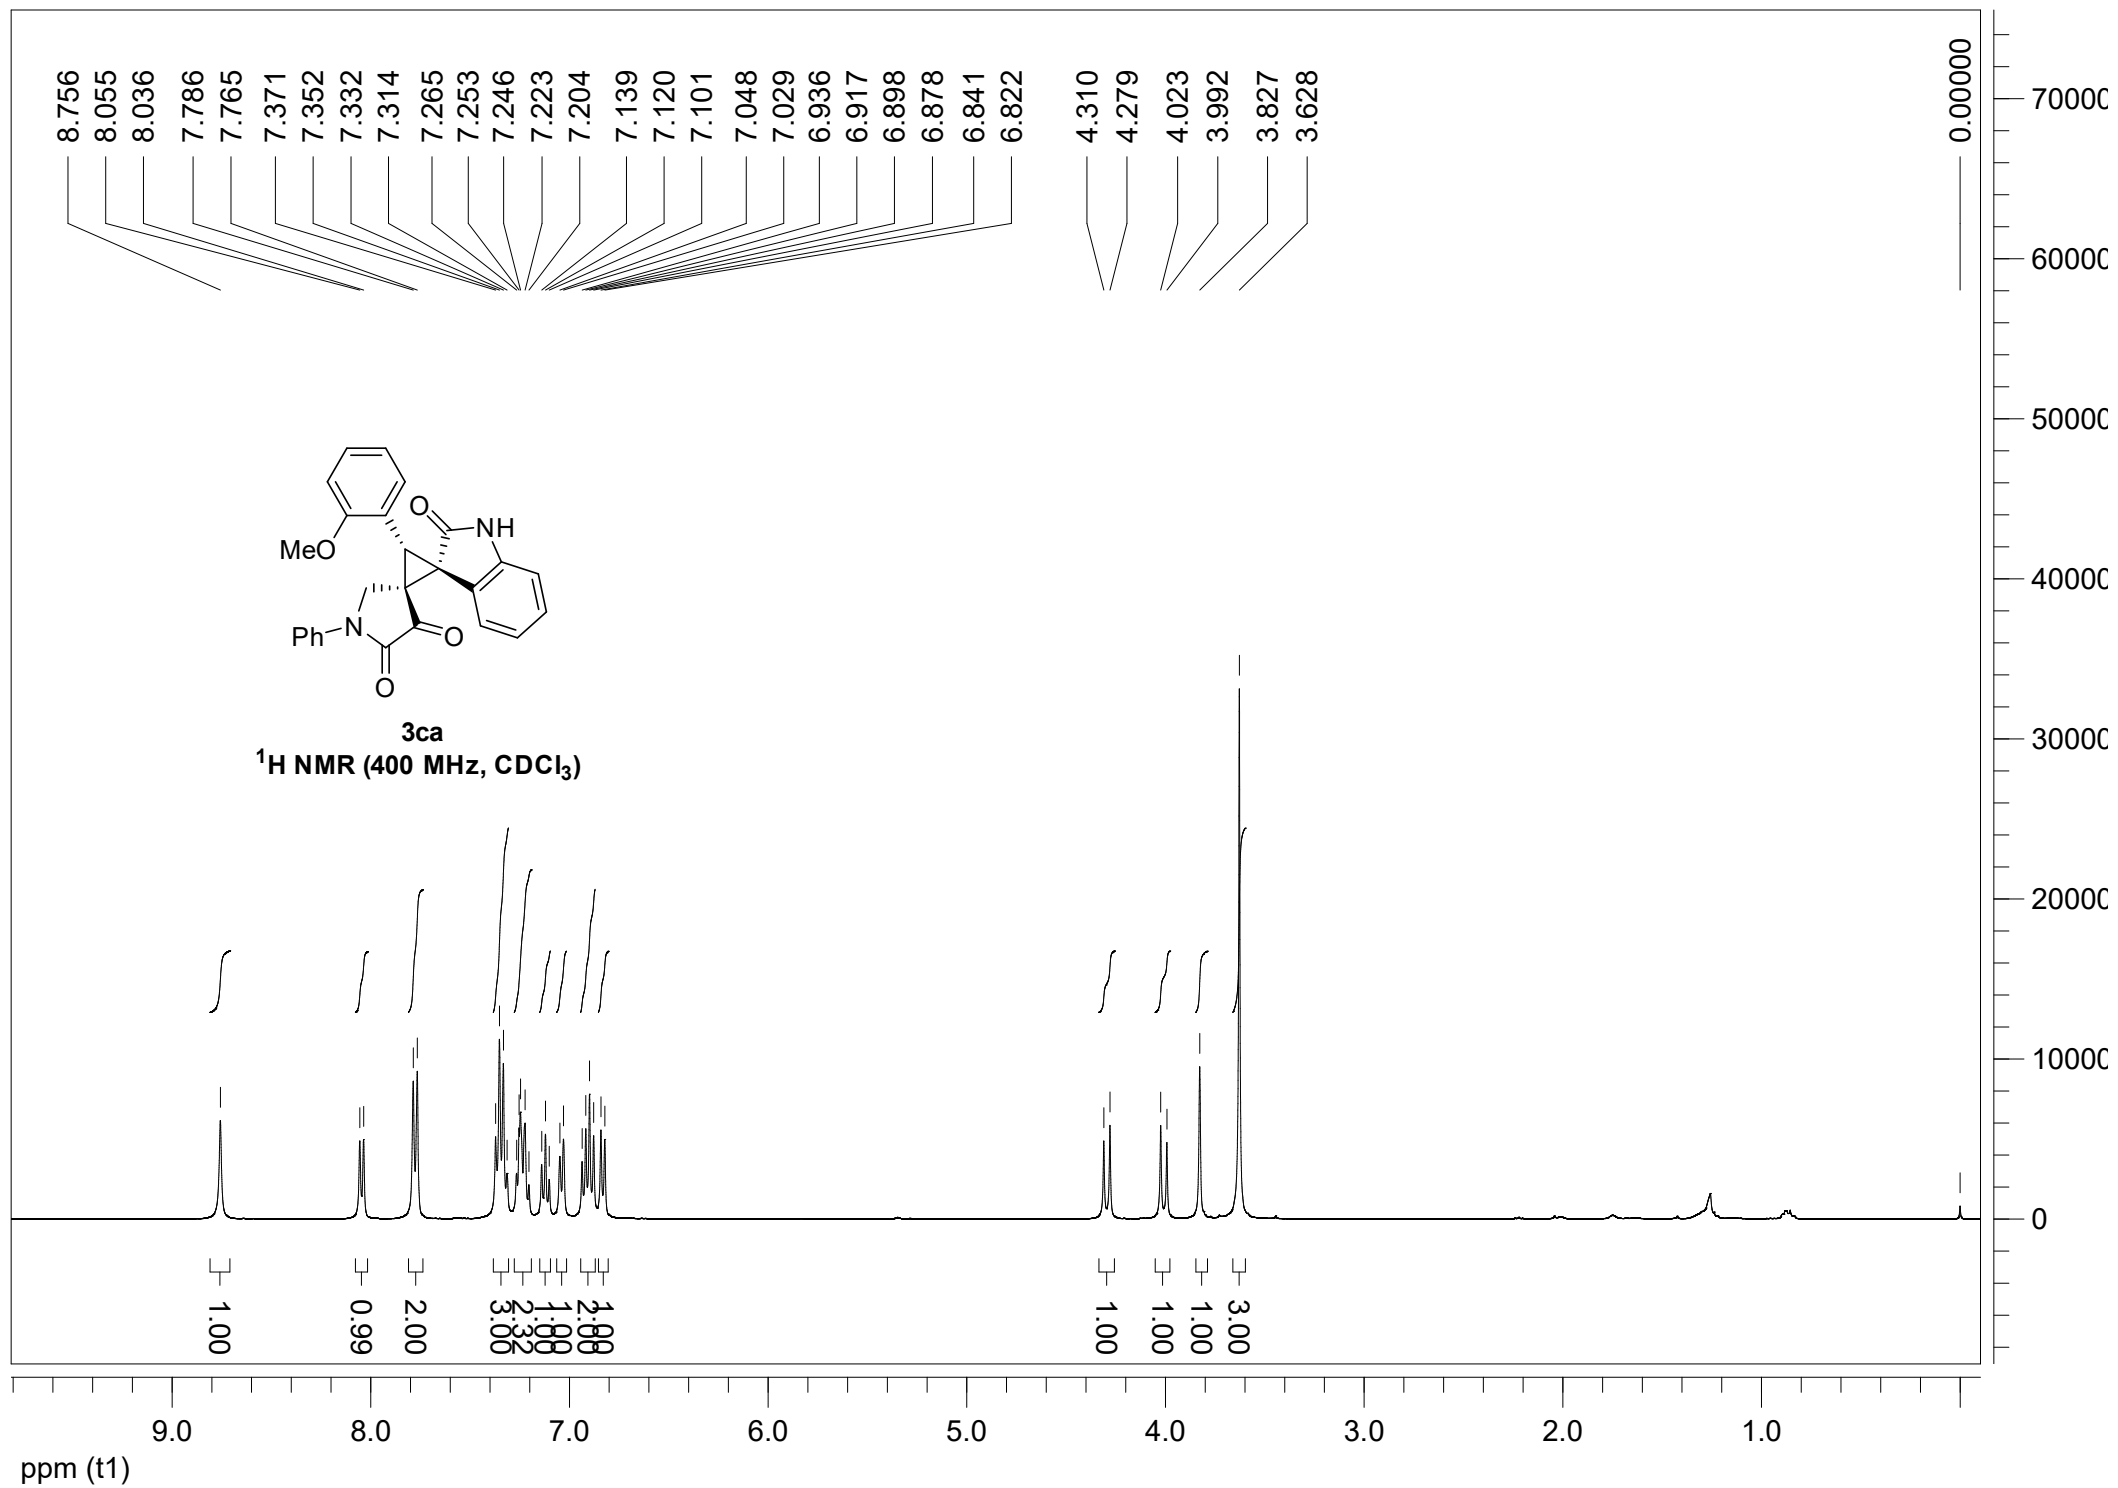

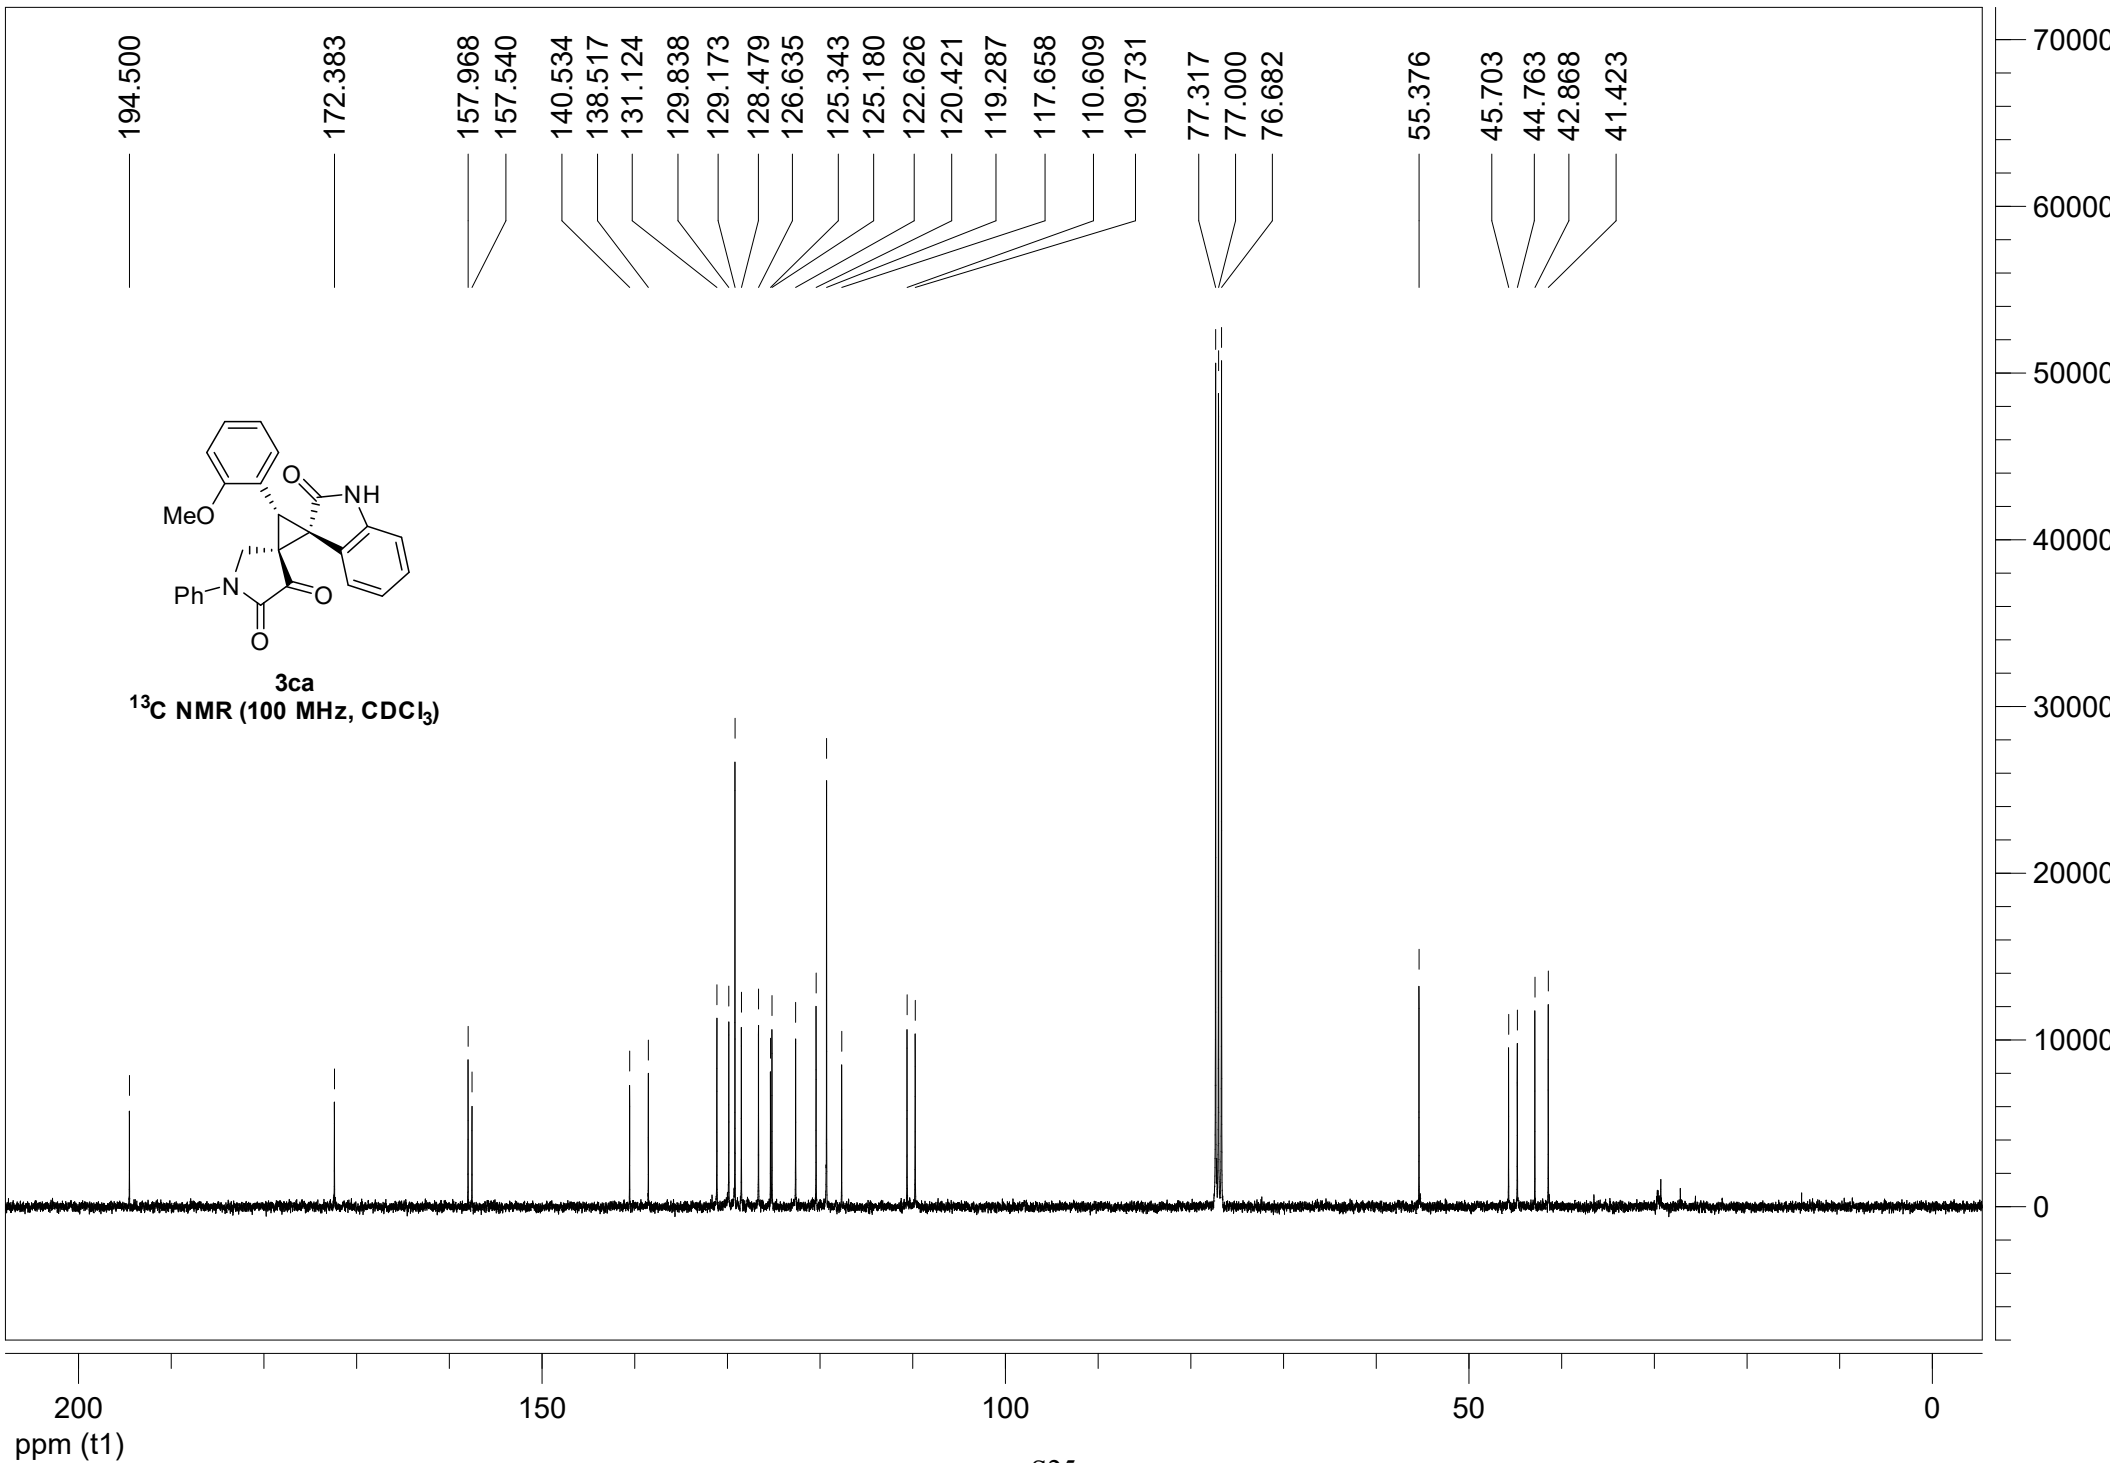

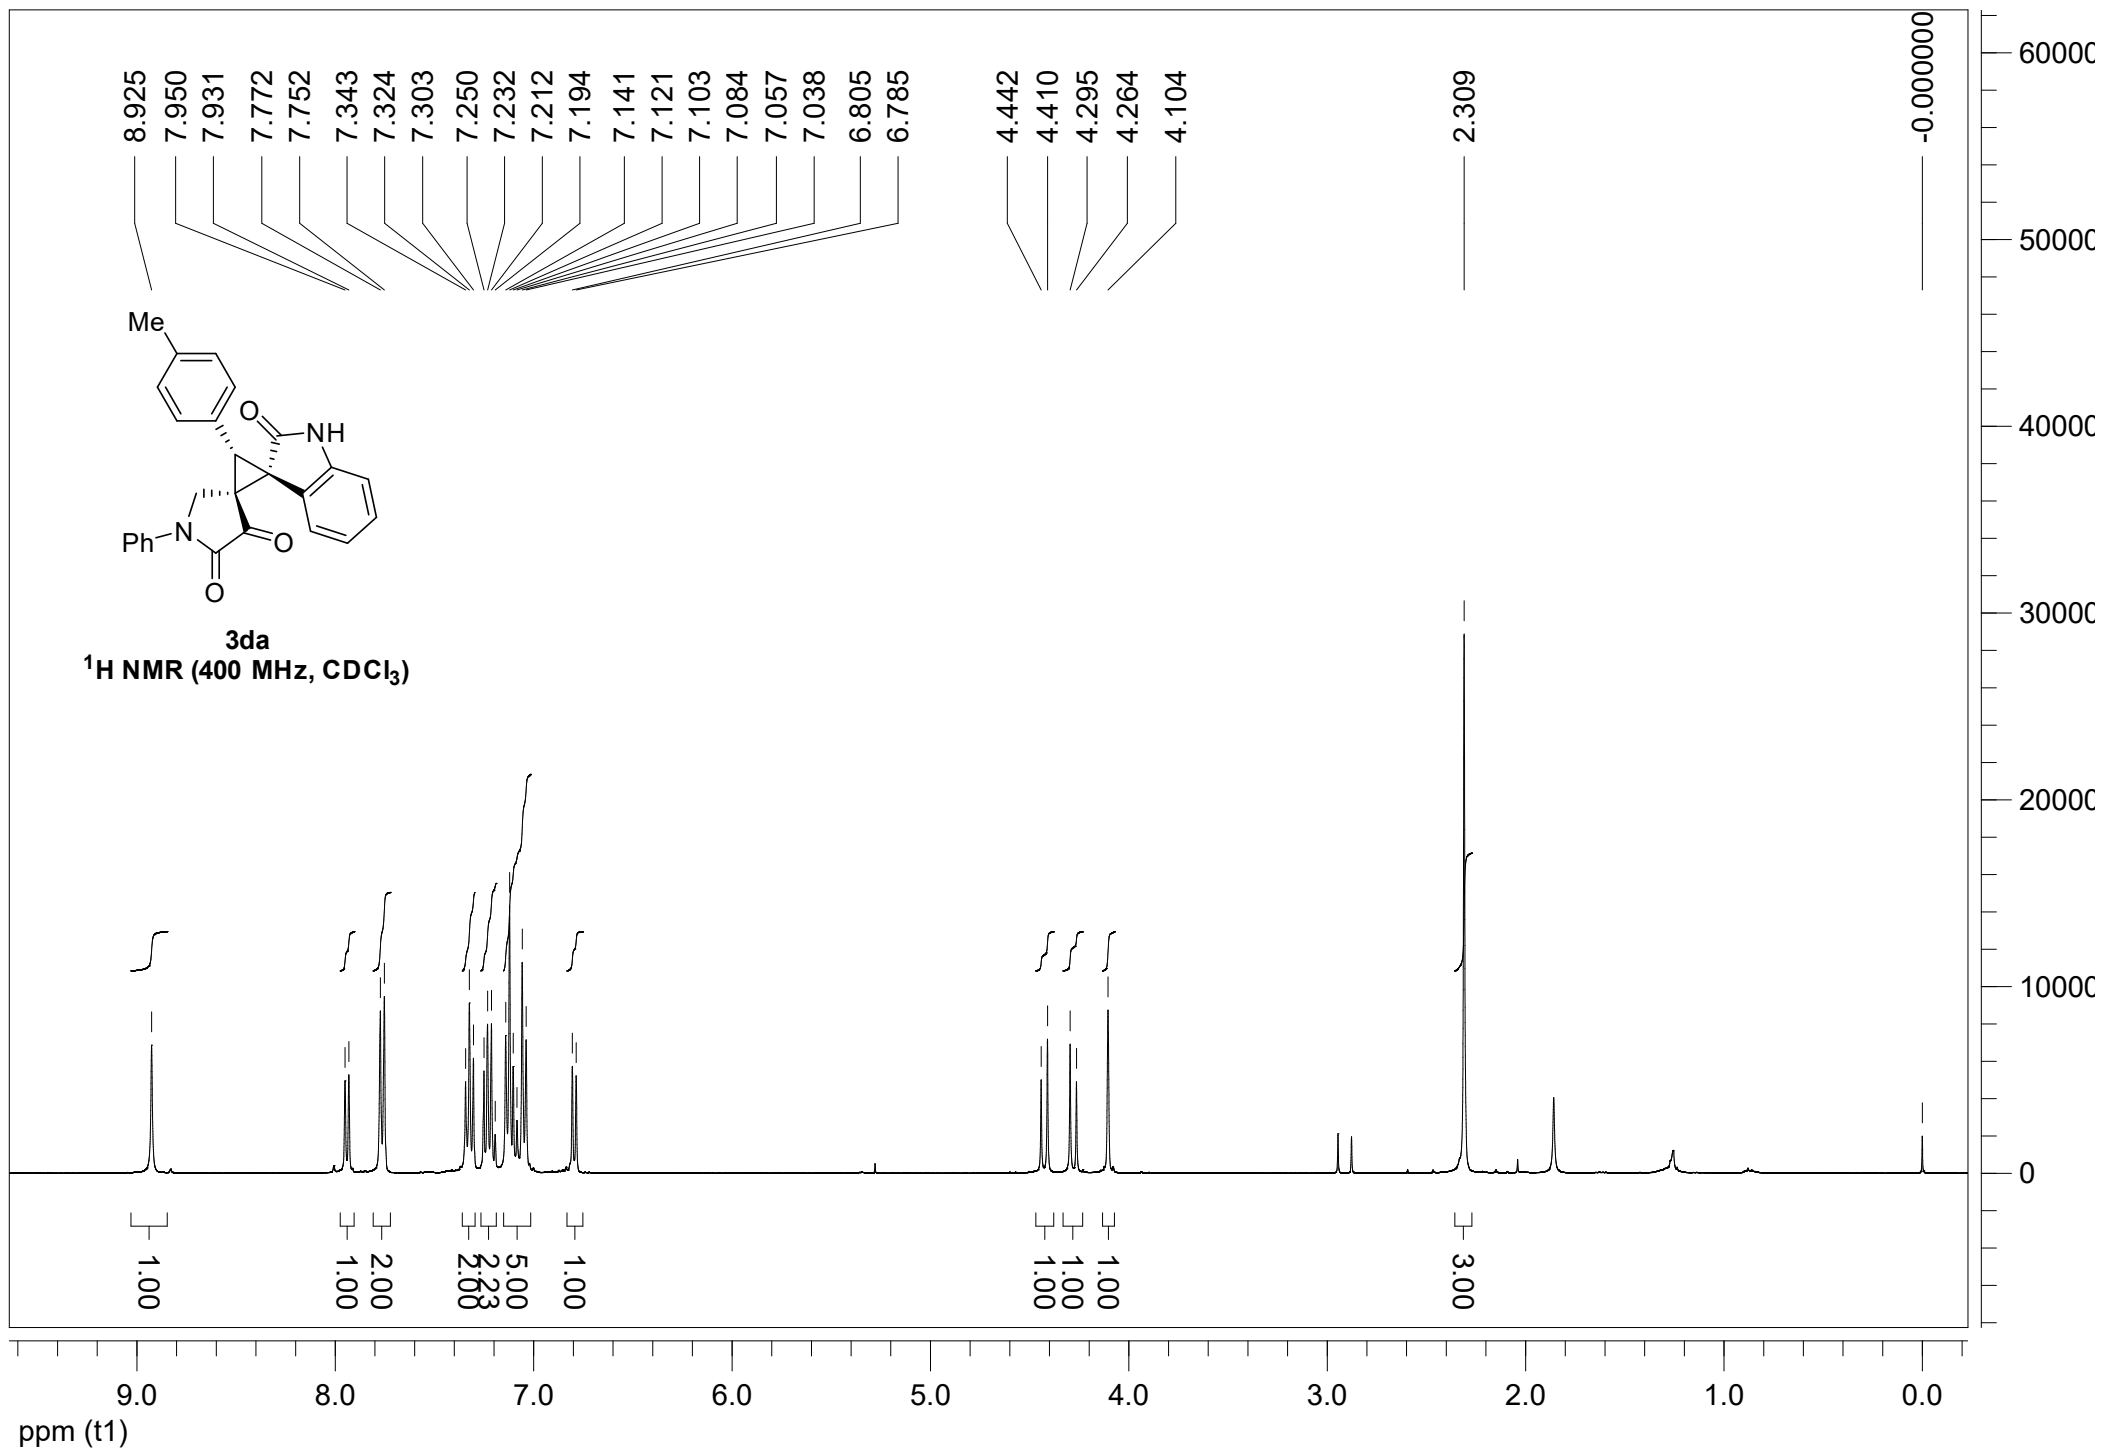

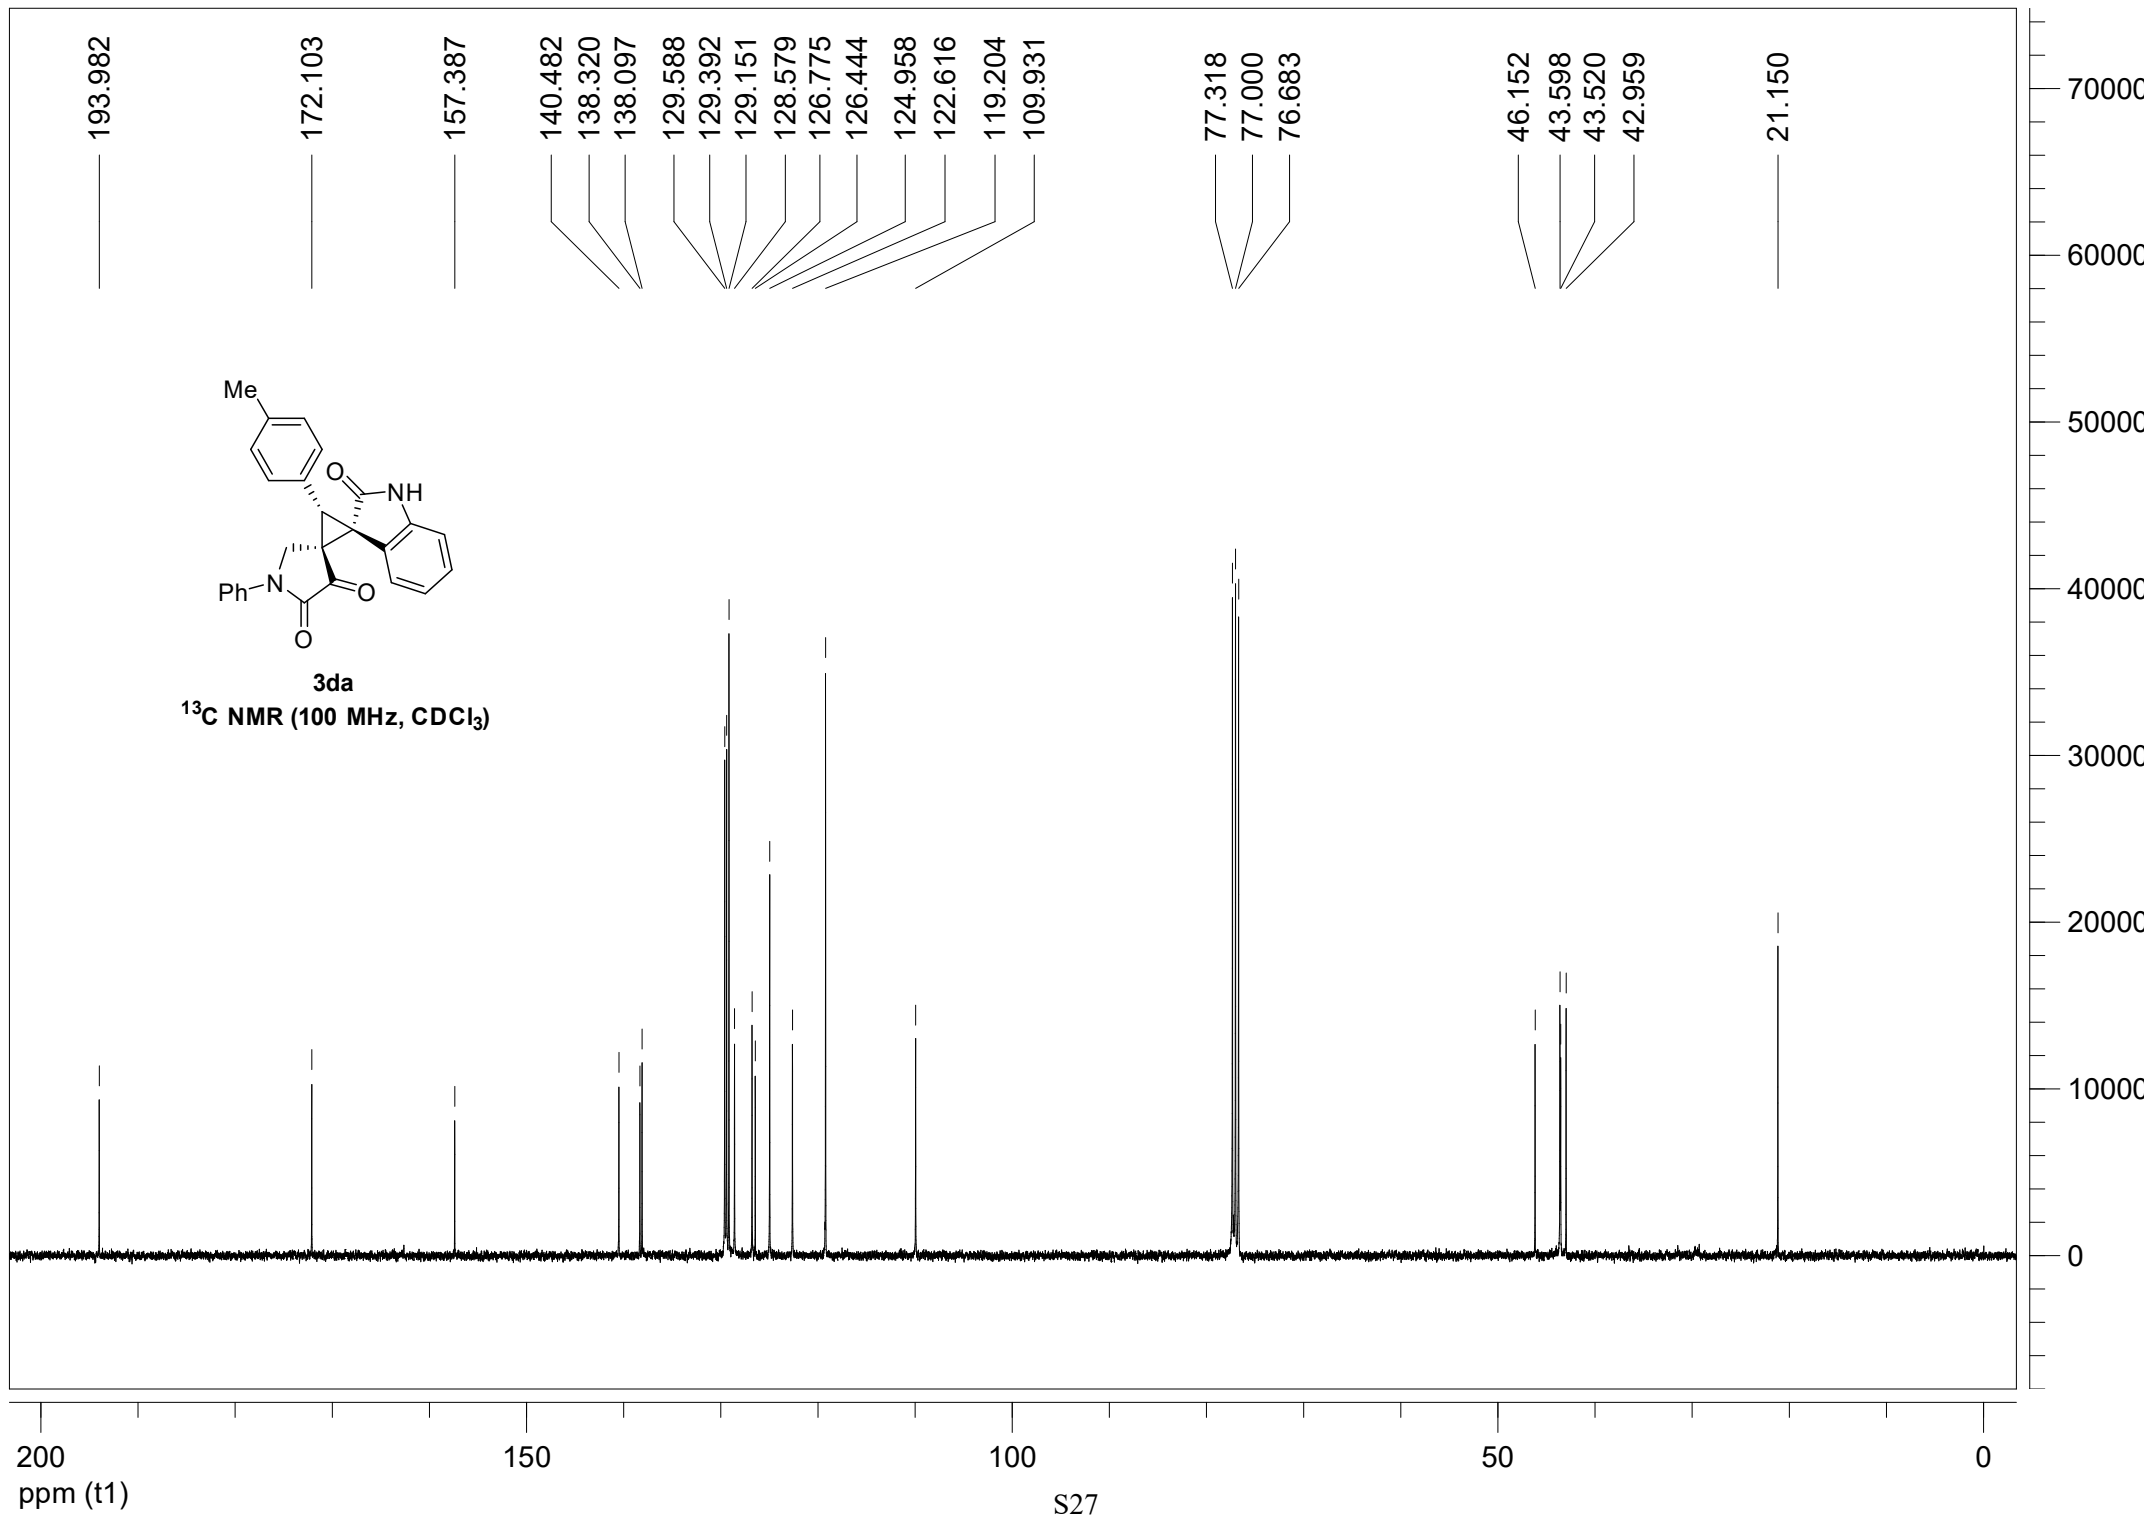

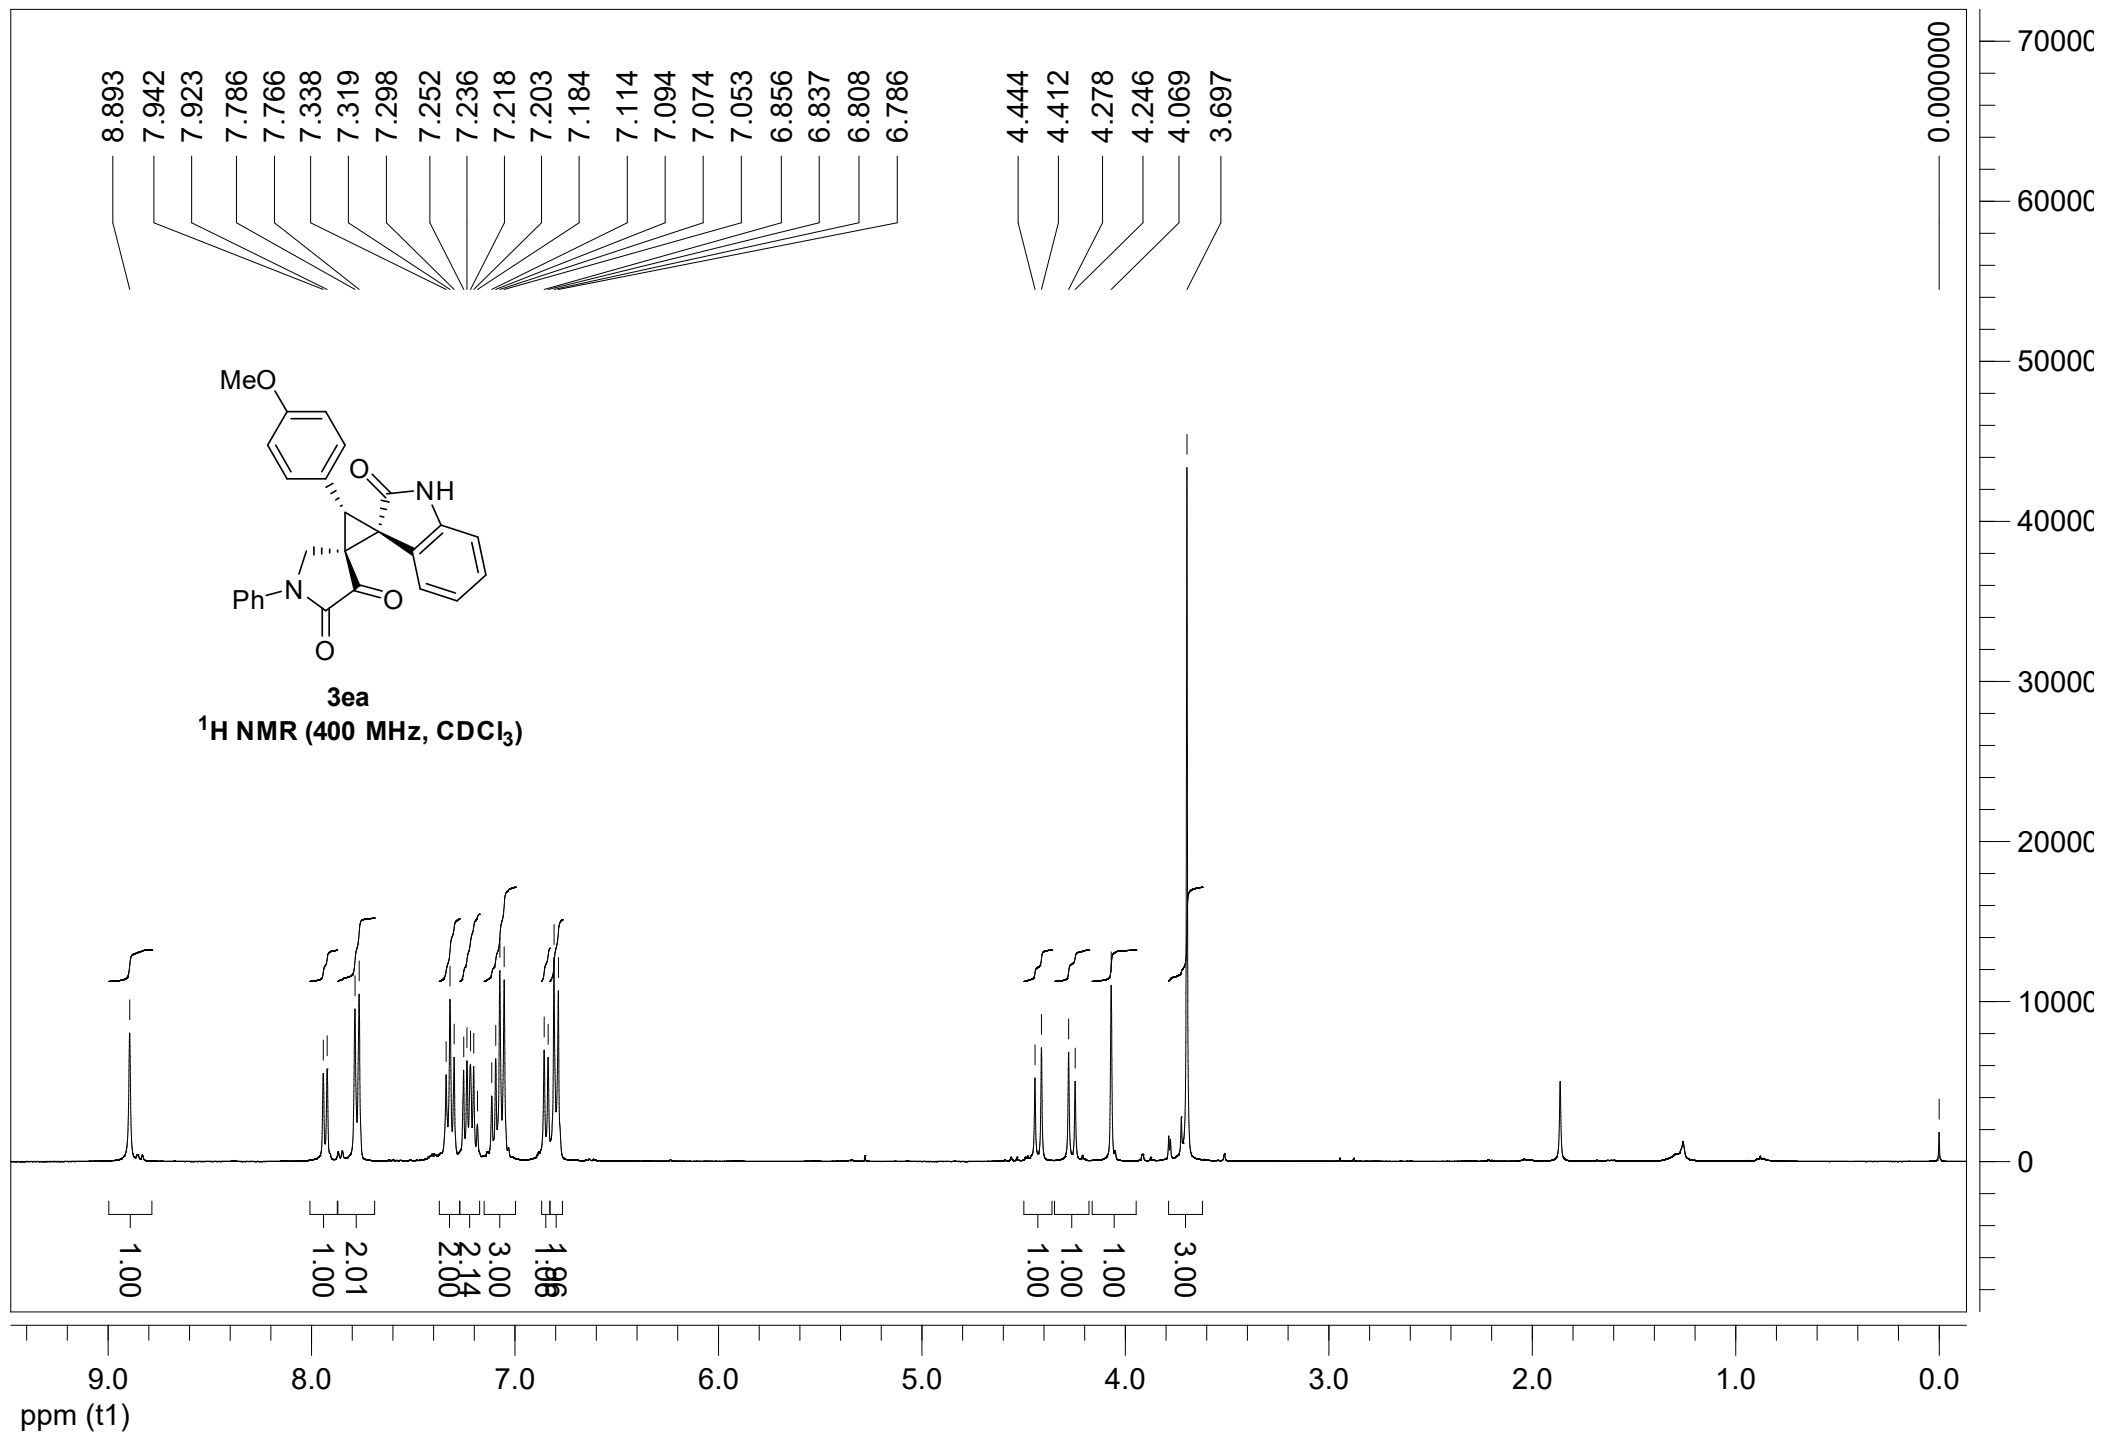

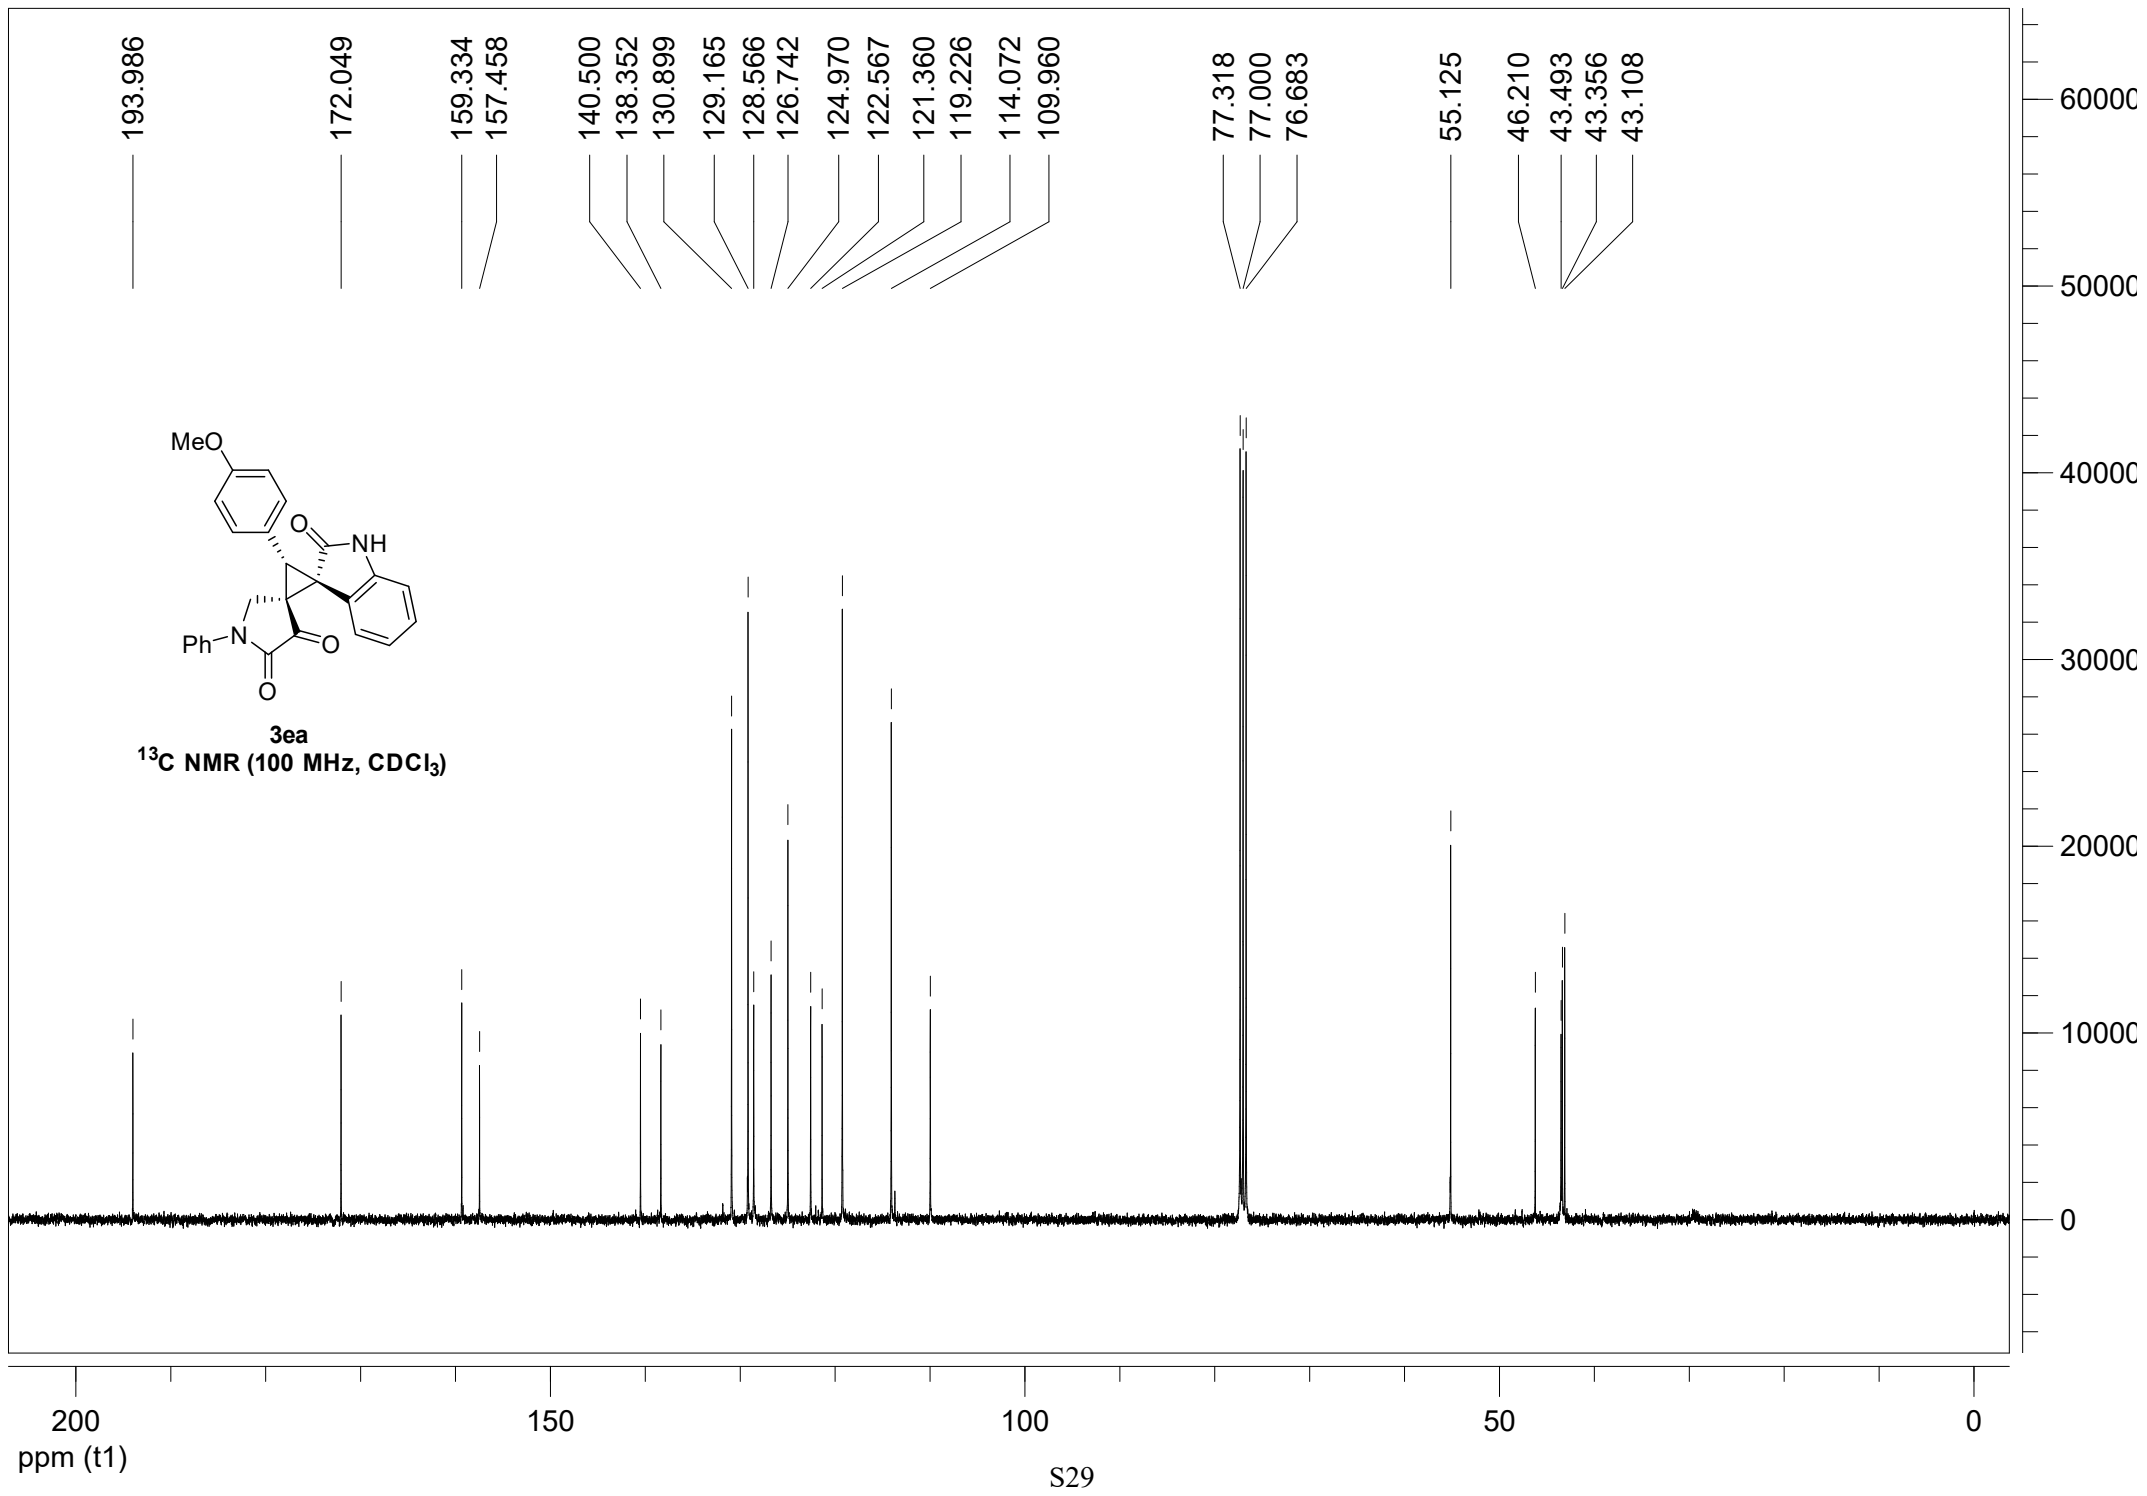

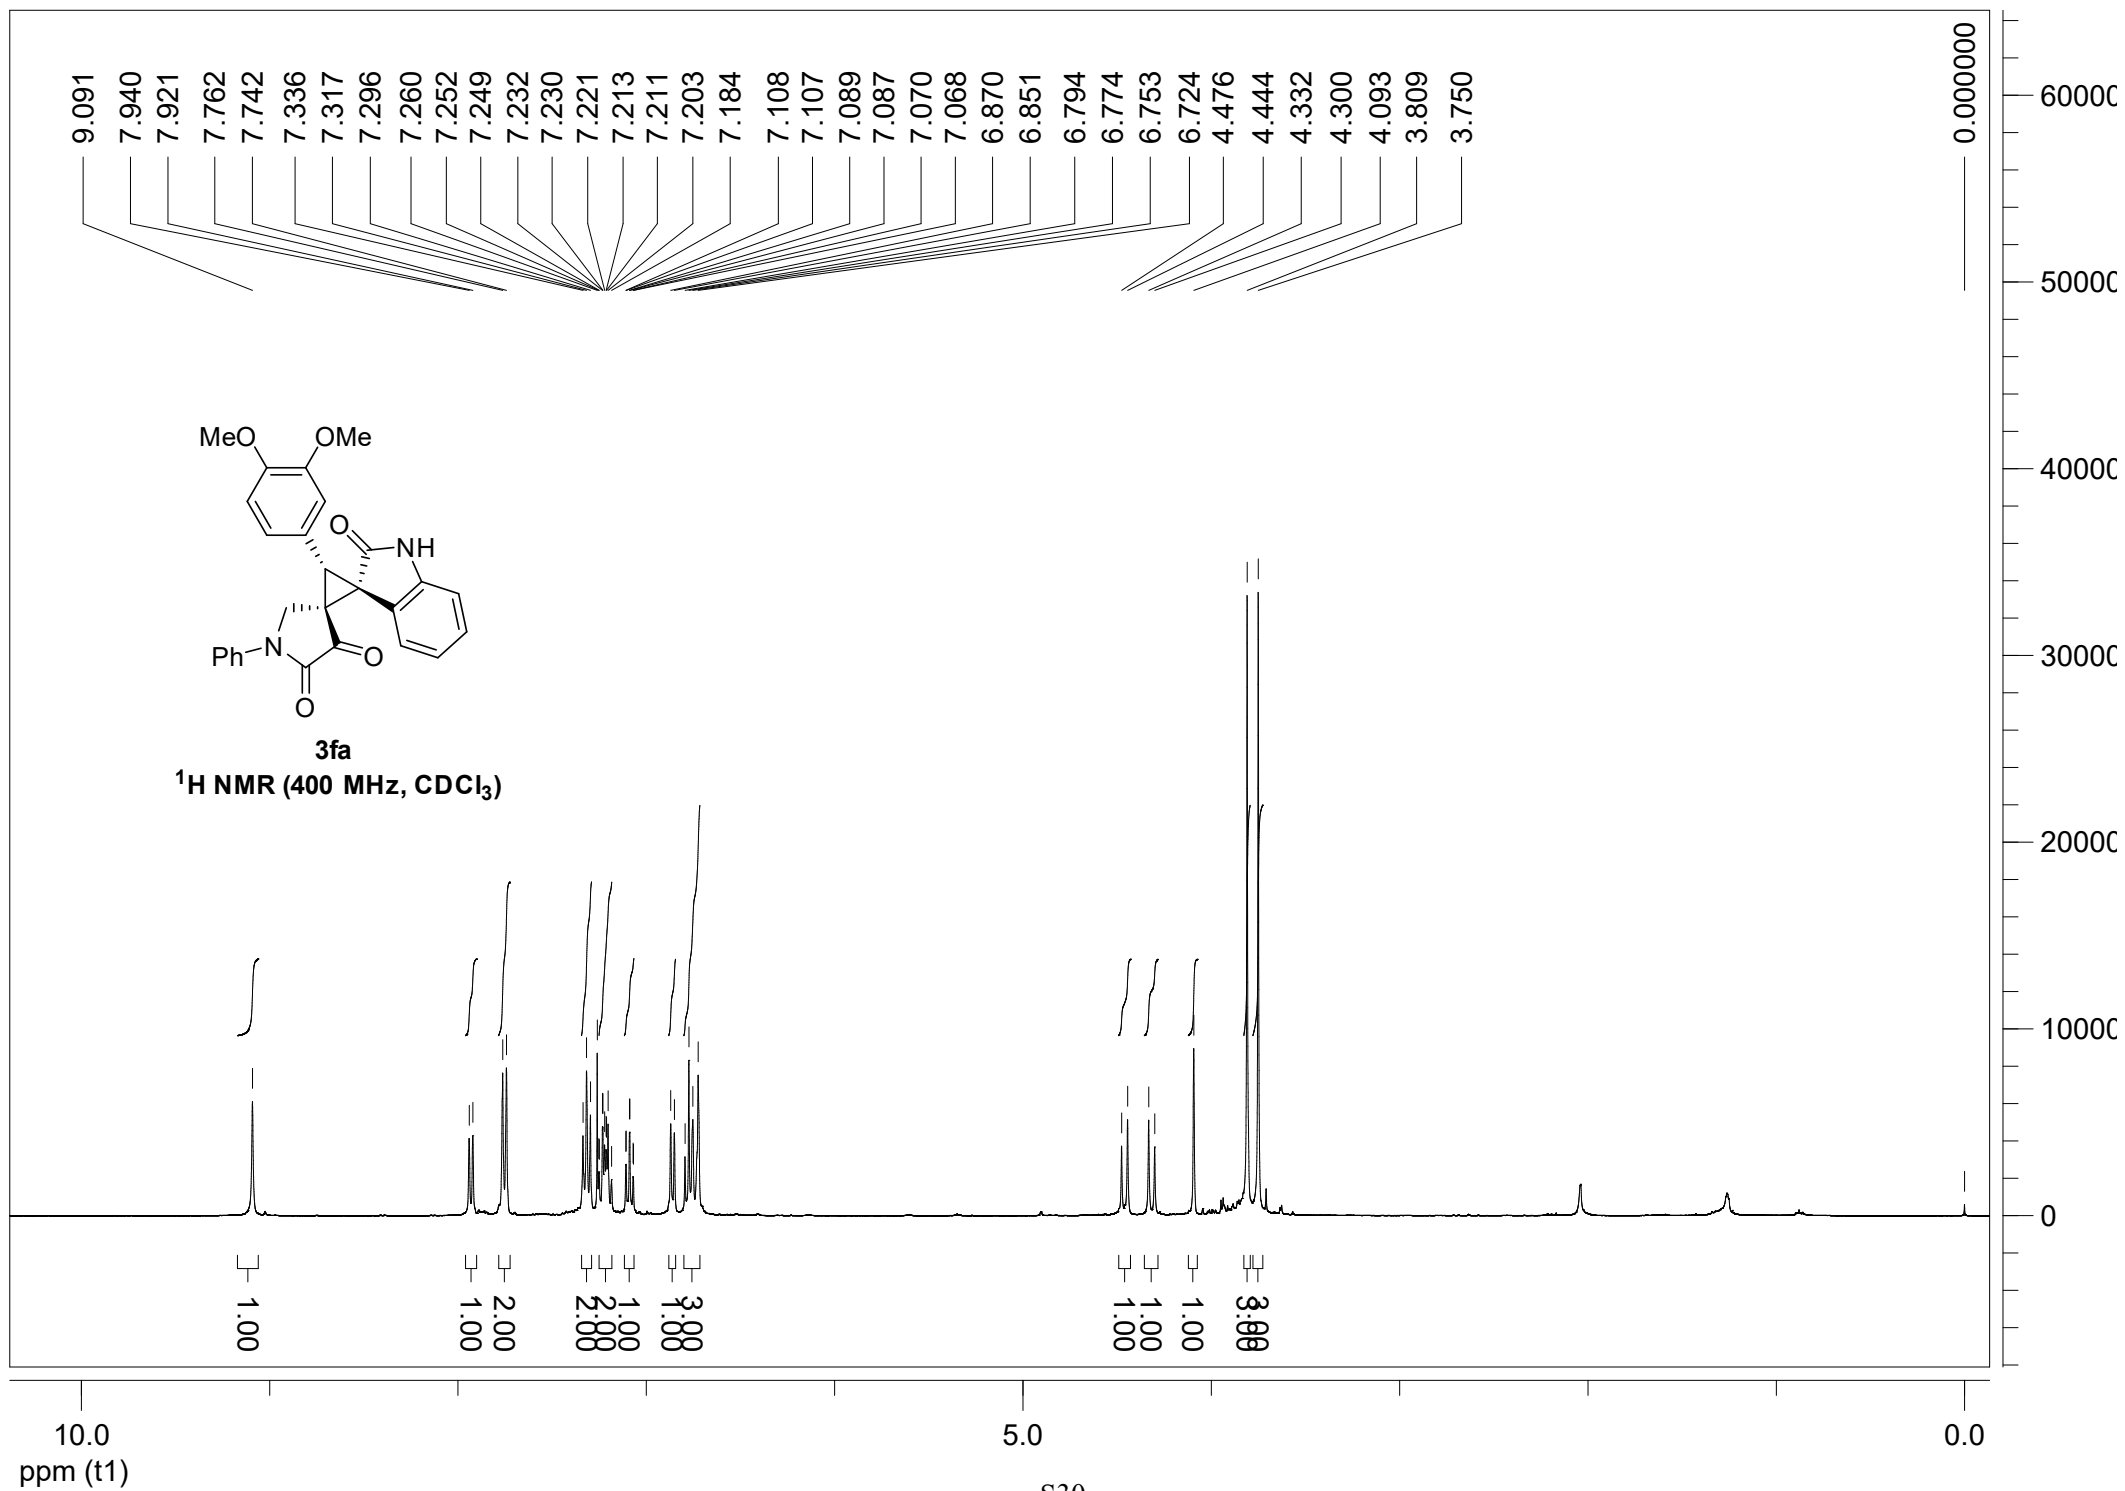

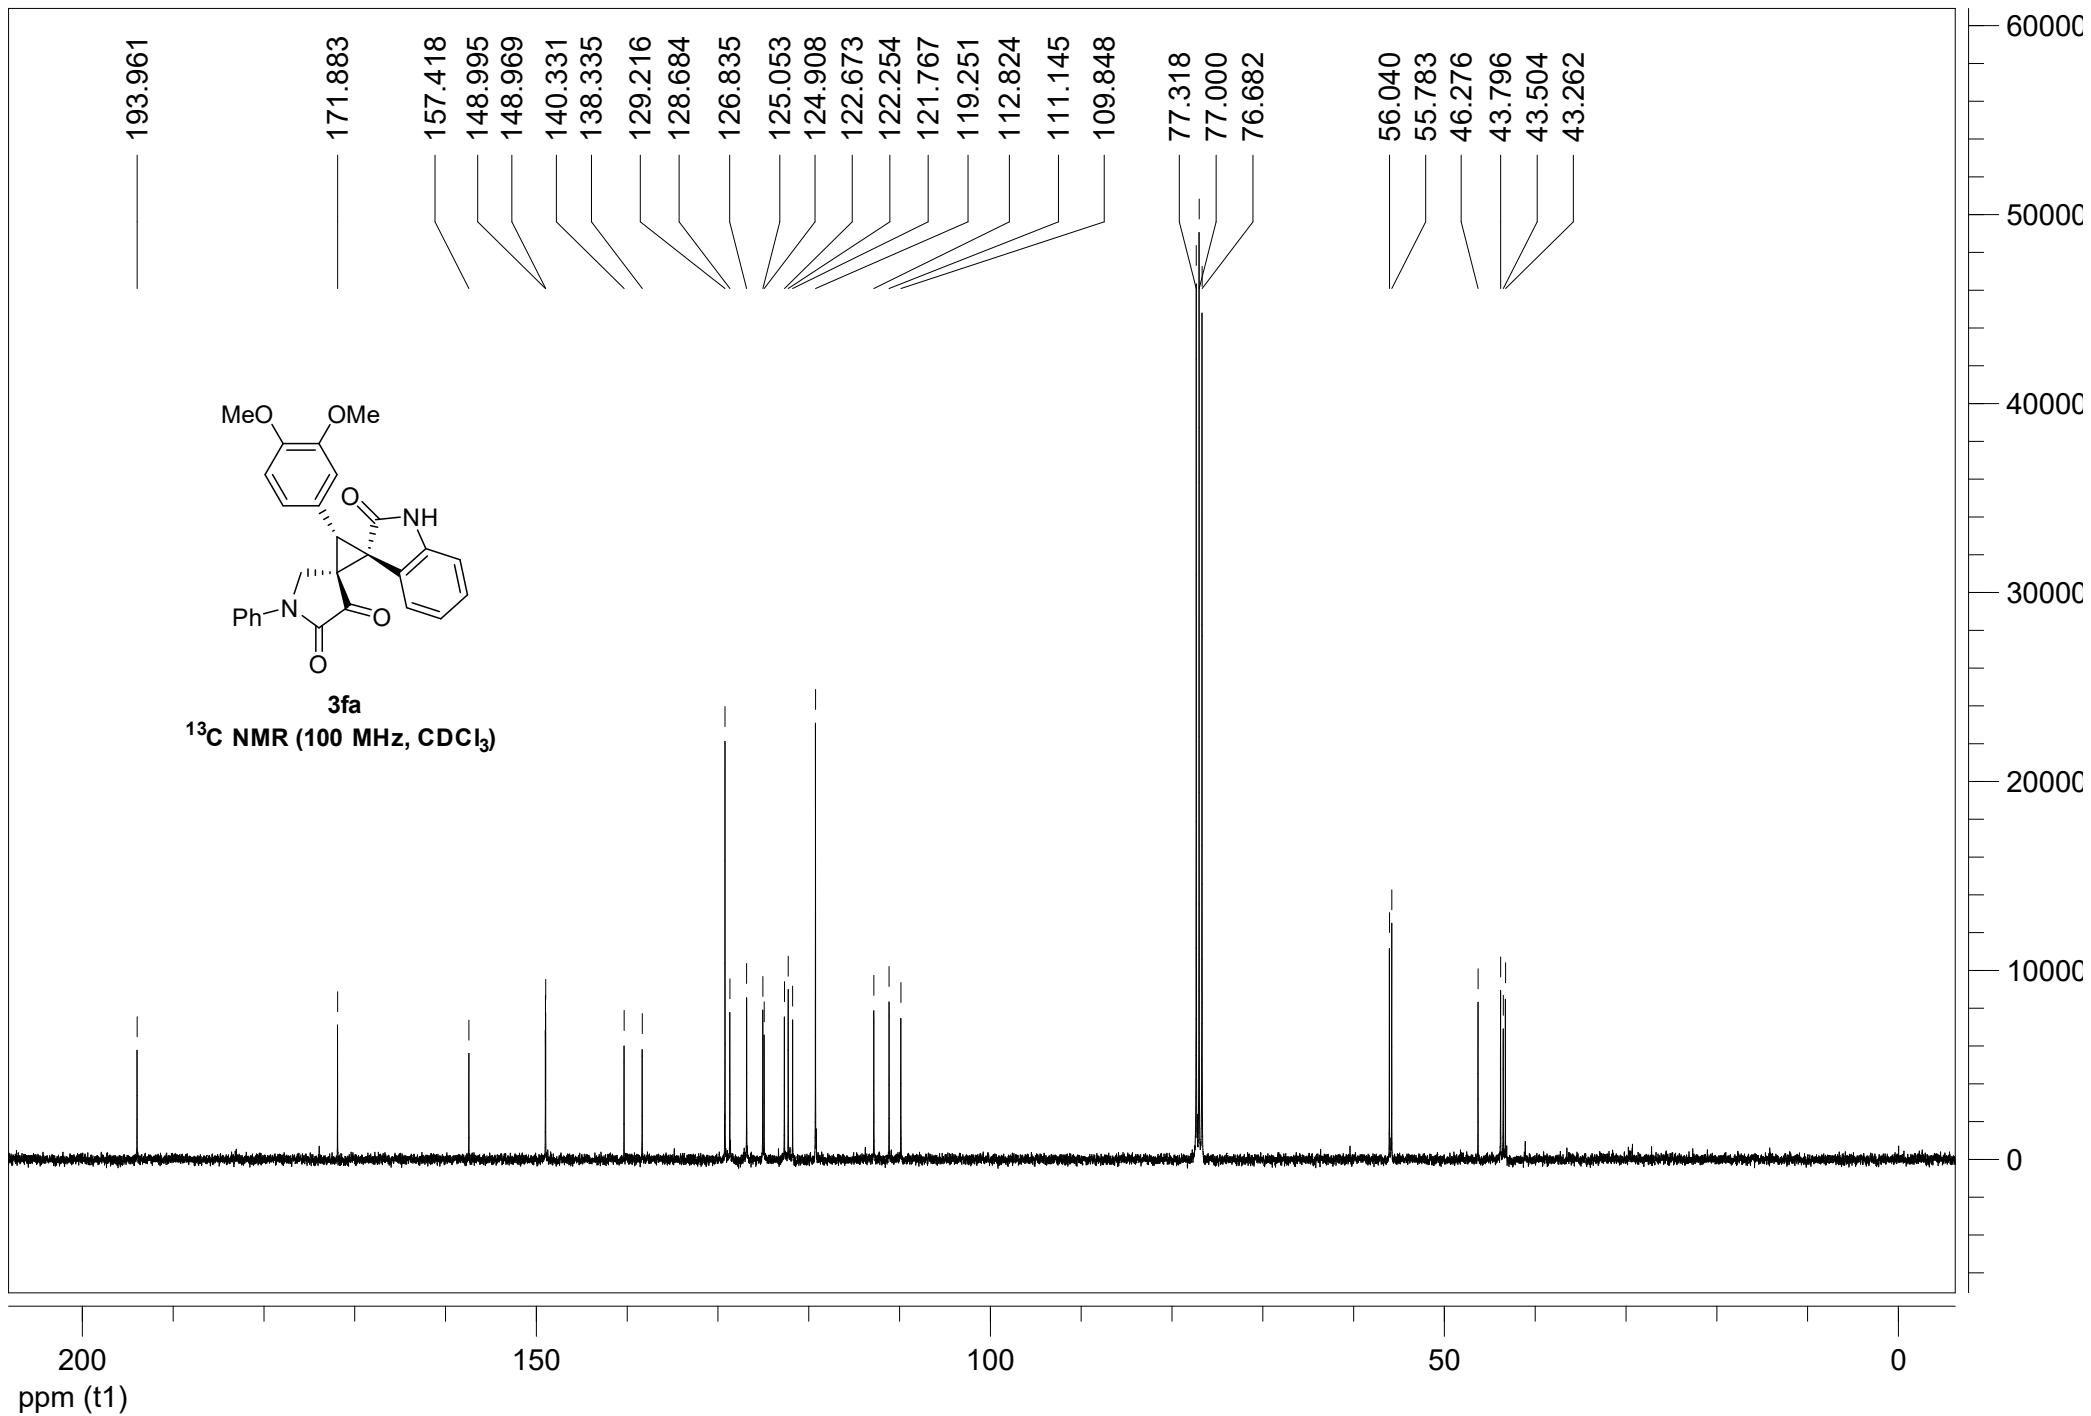



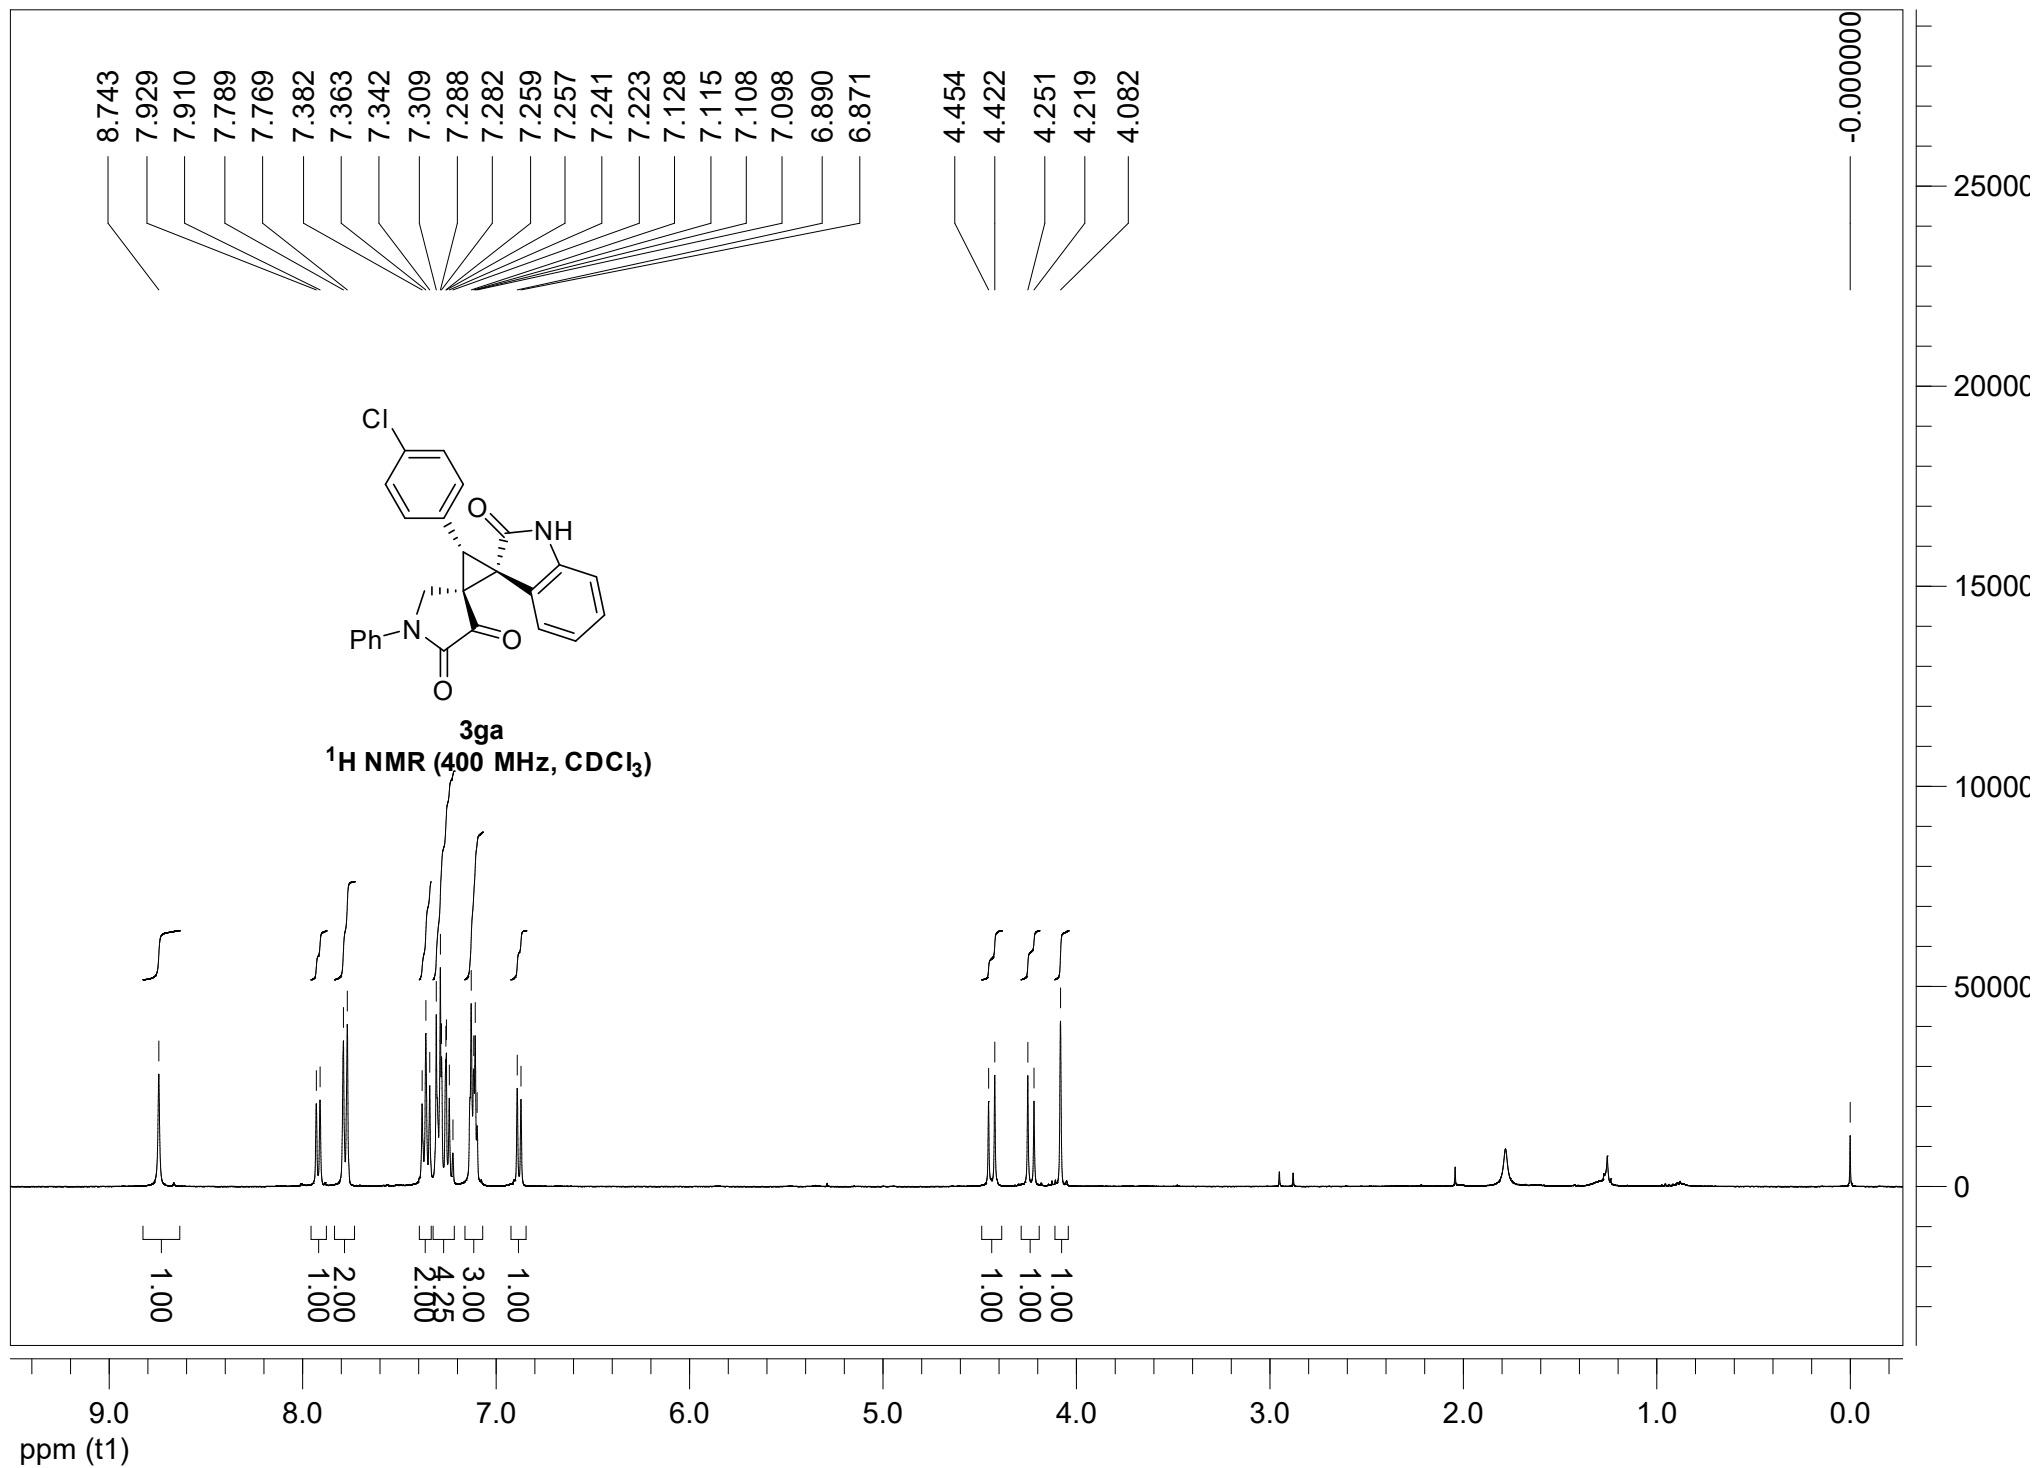

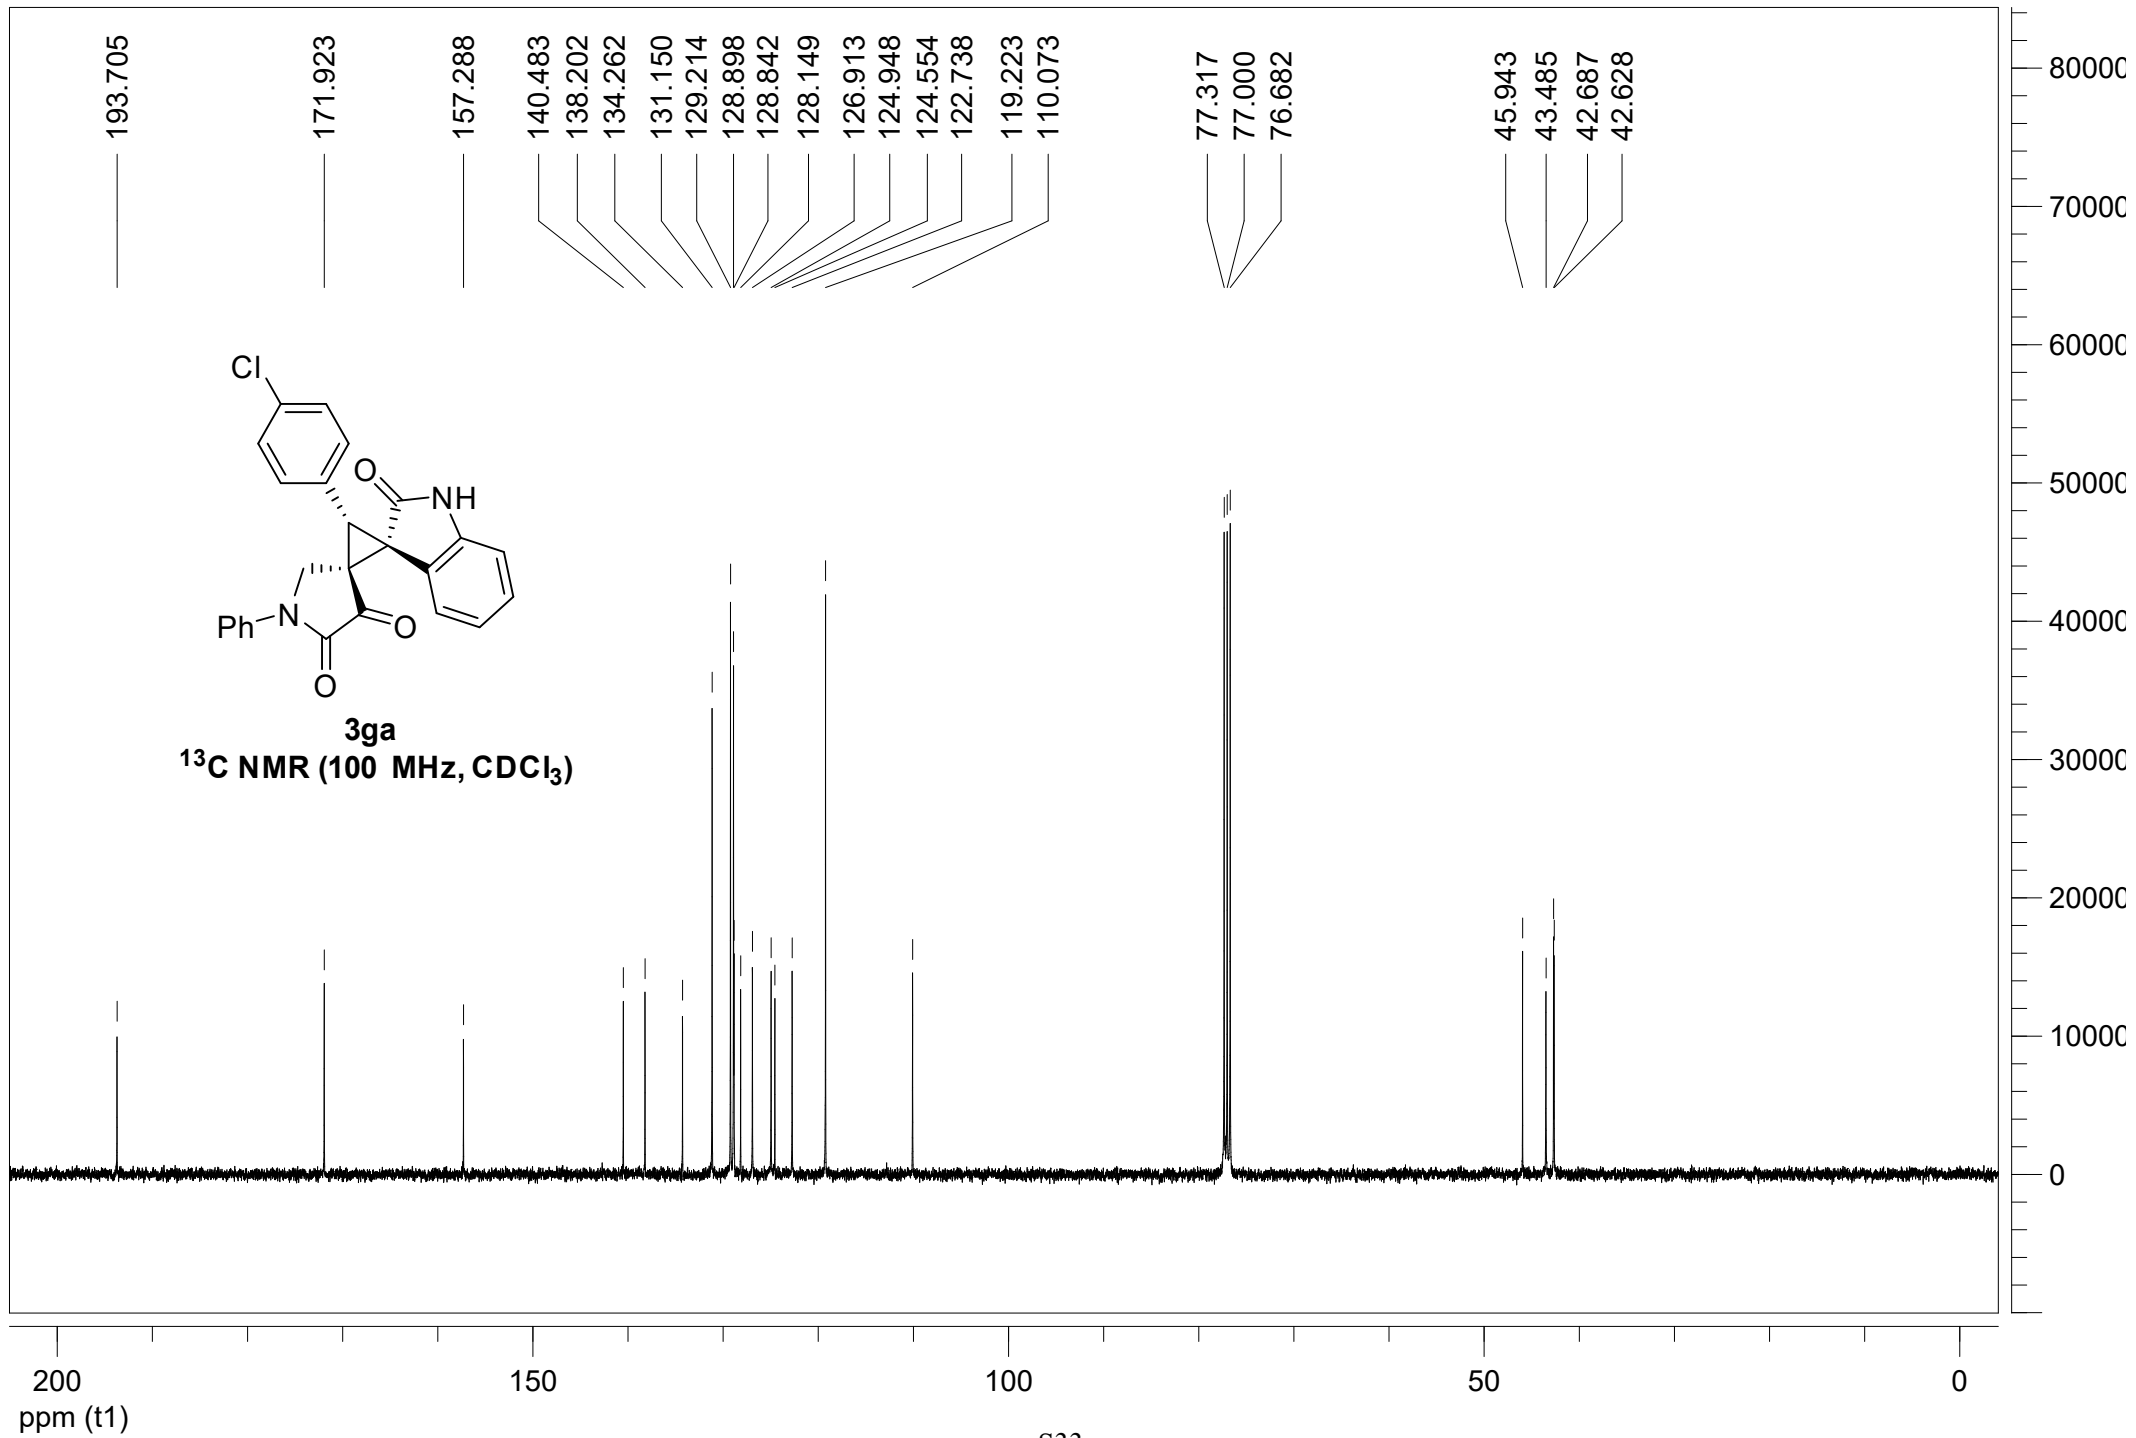

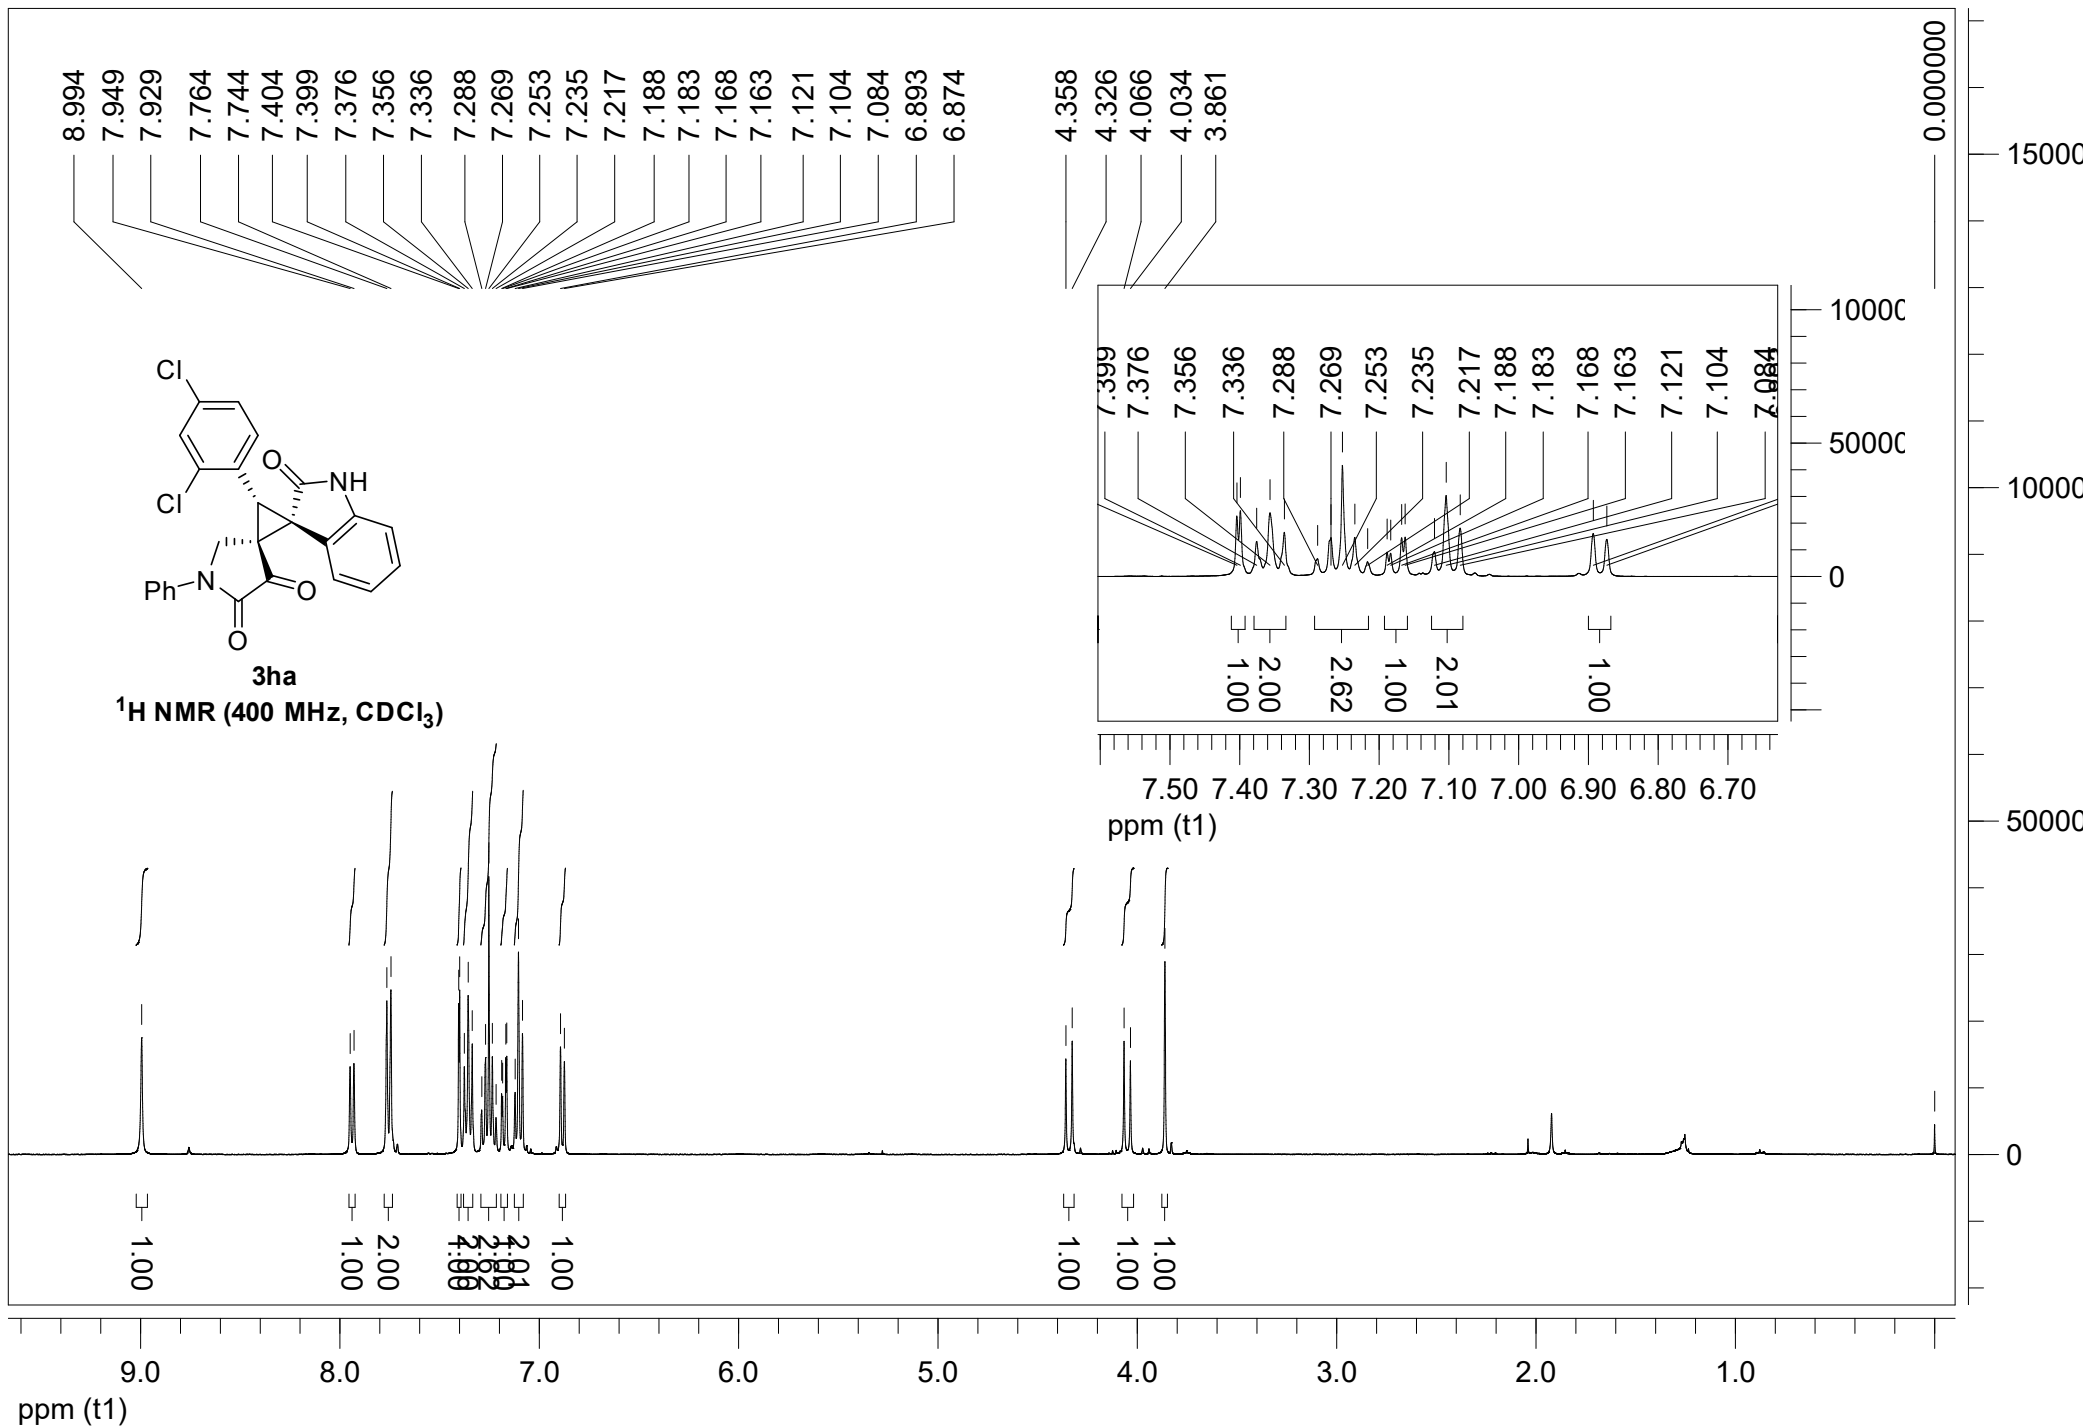

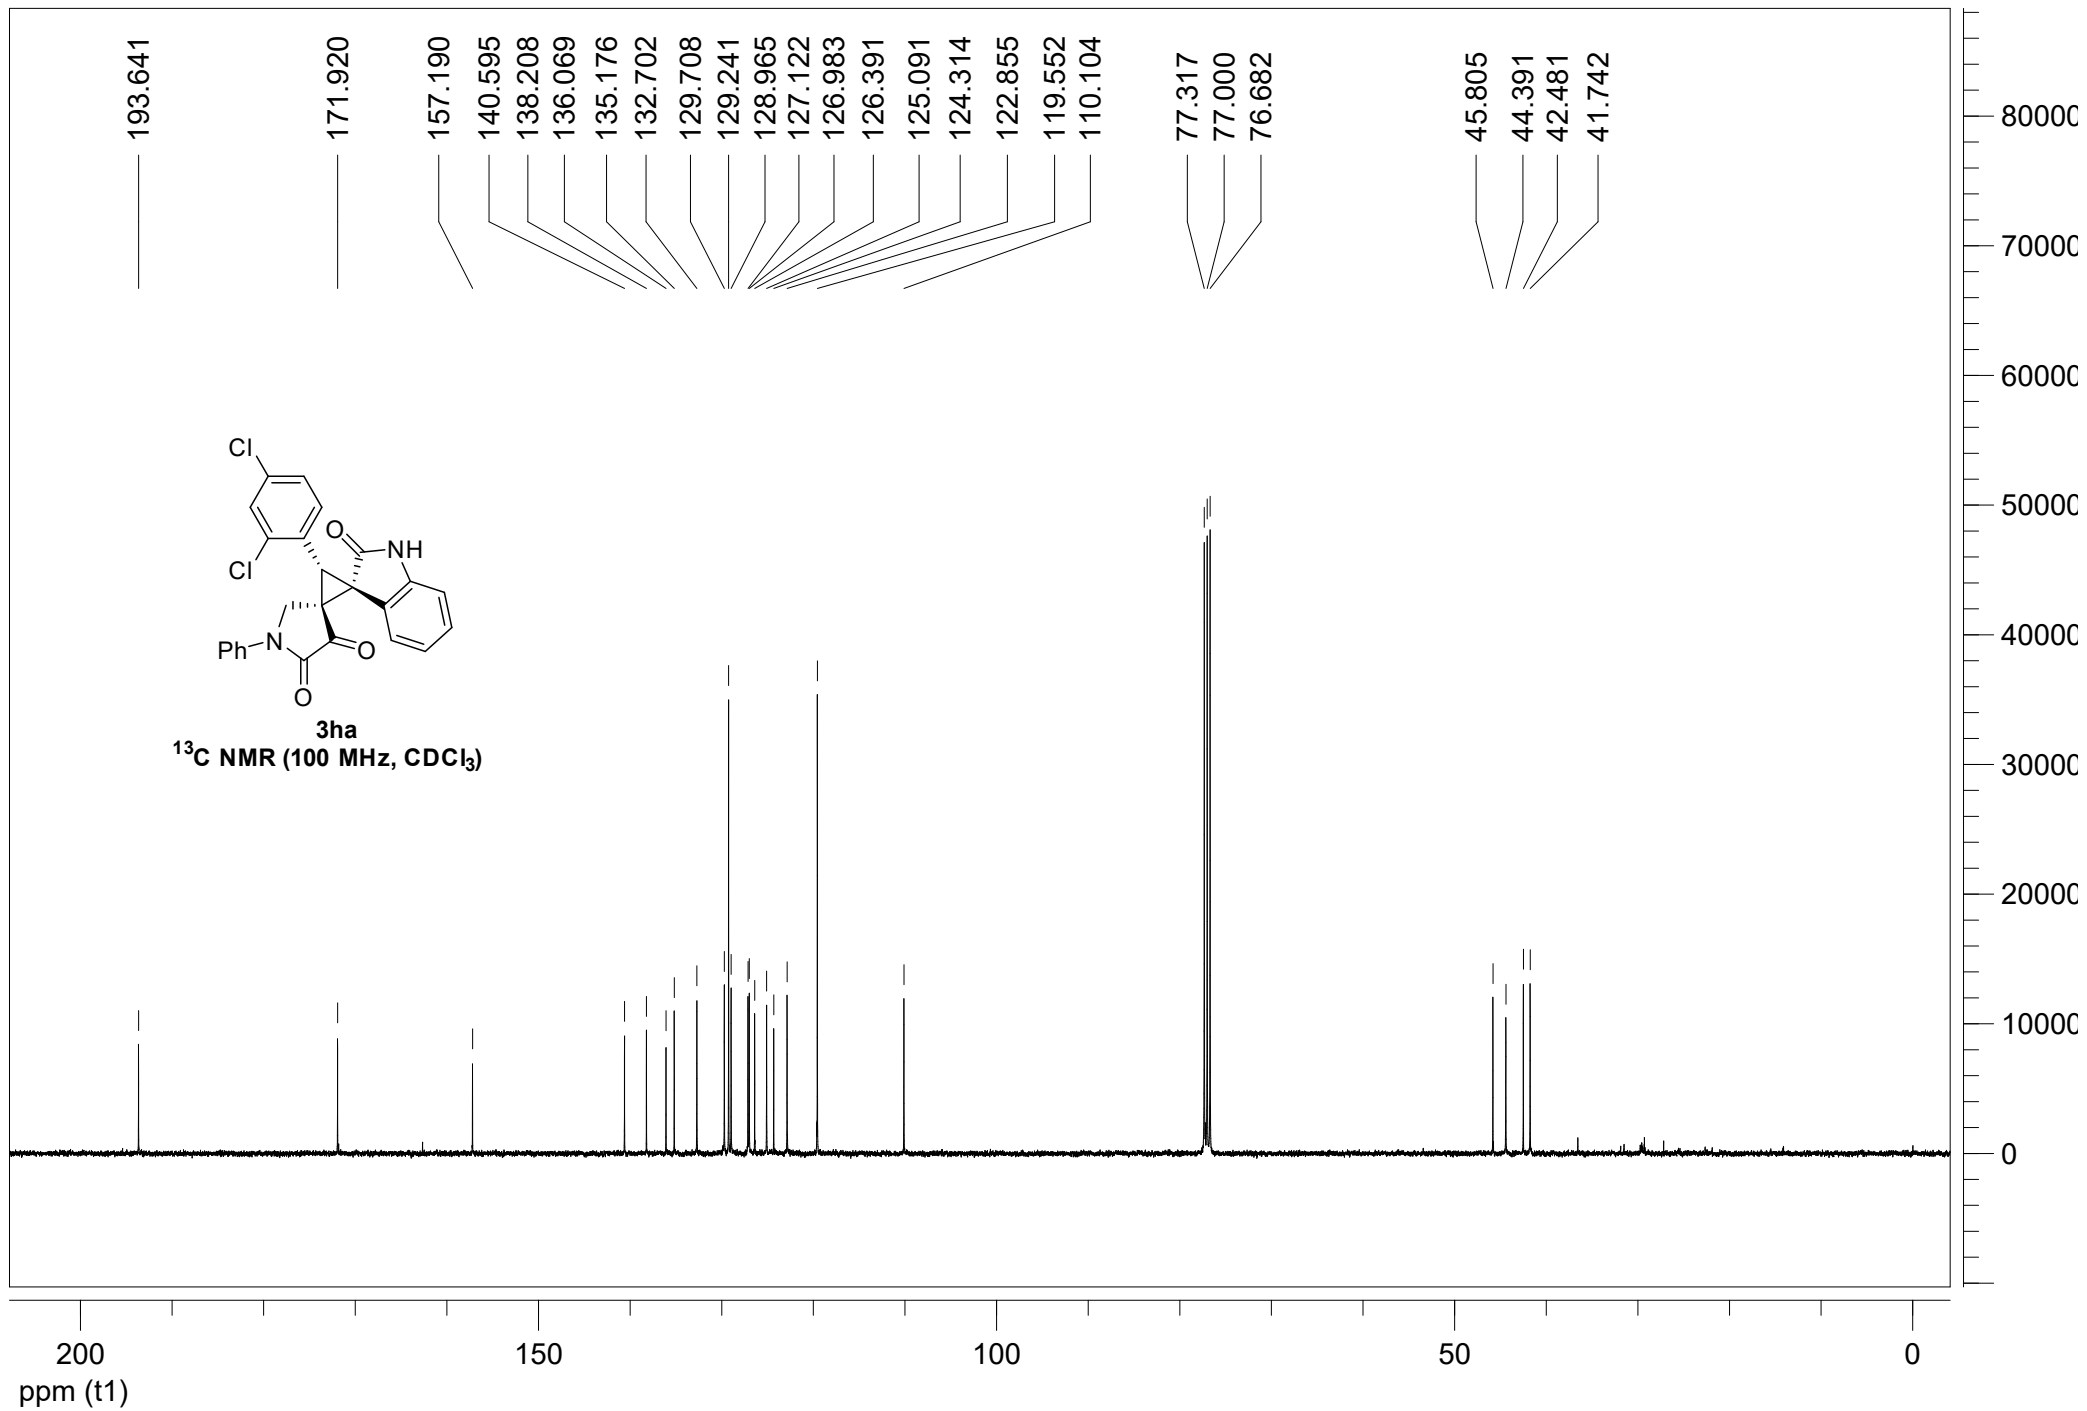

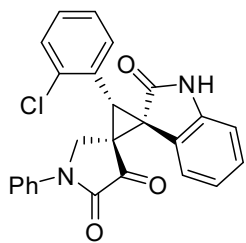

**3ia**  
**<sup>1</sup>H NMR (400 MHz, CDCl<sub>3</sub>)**

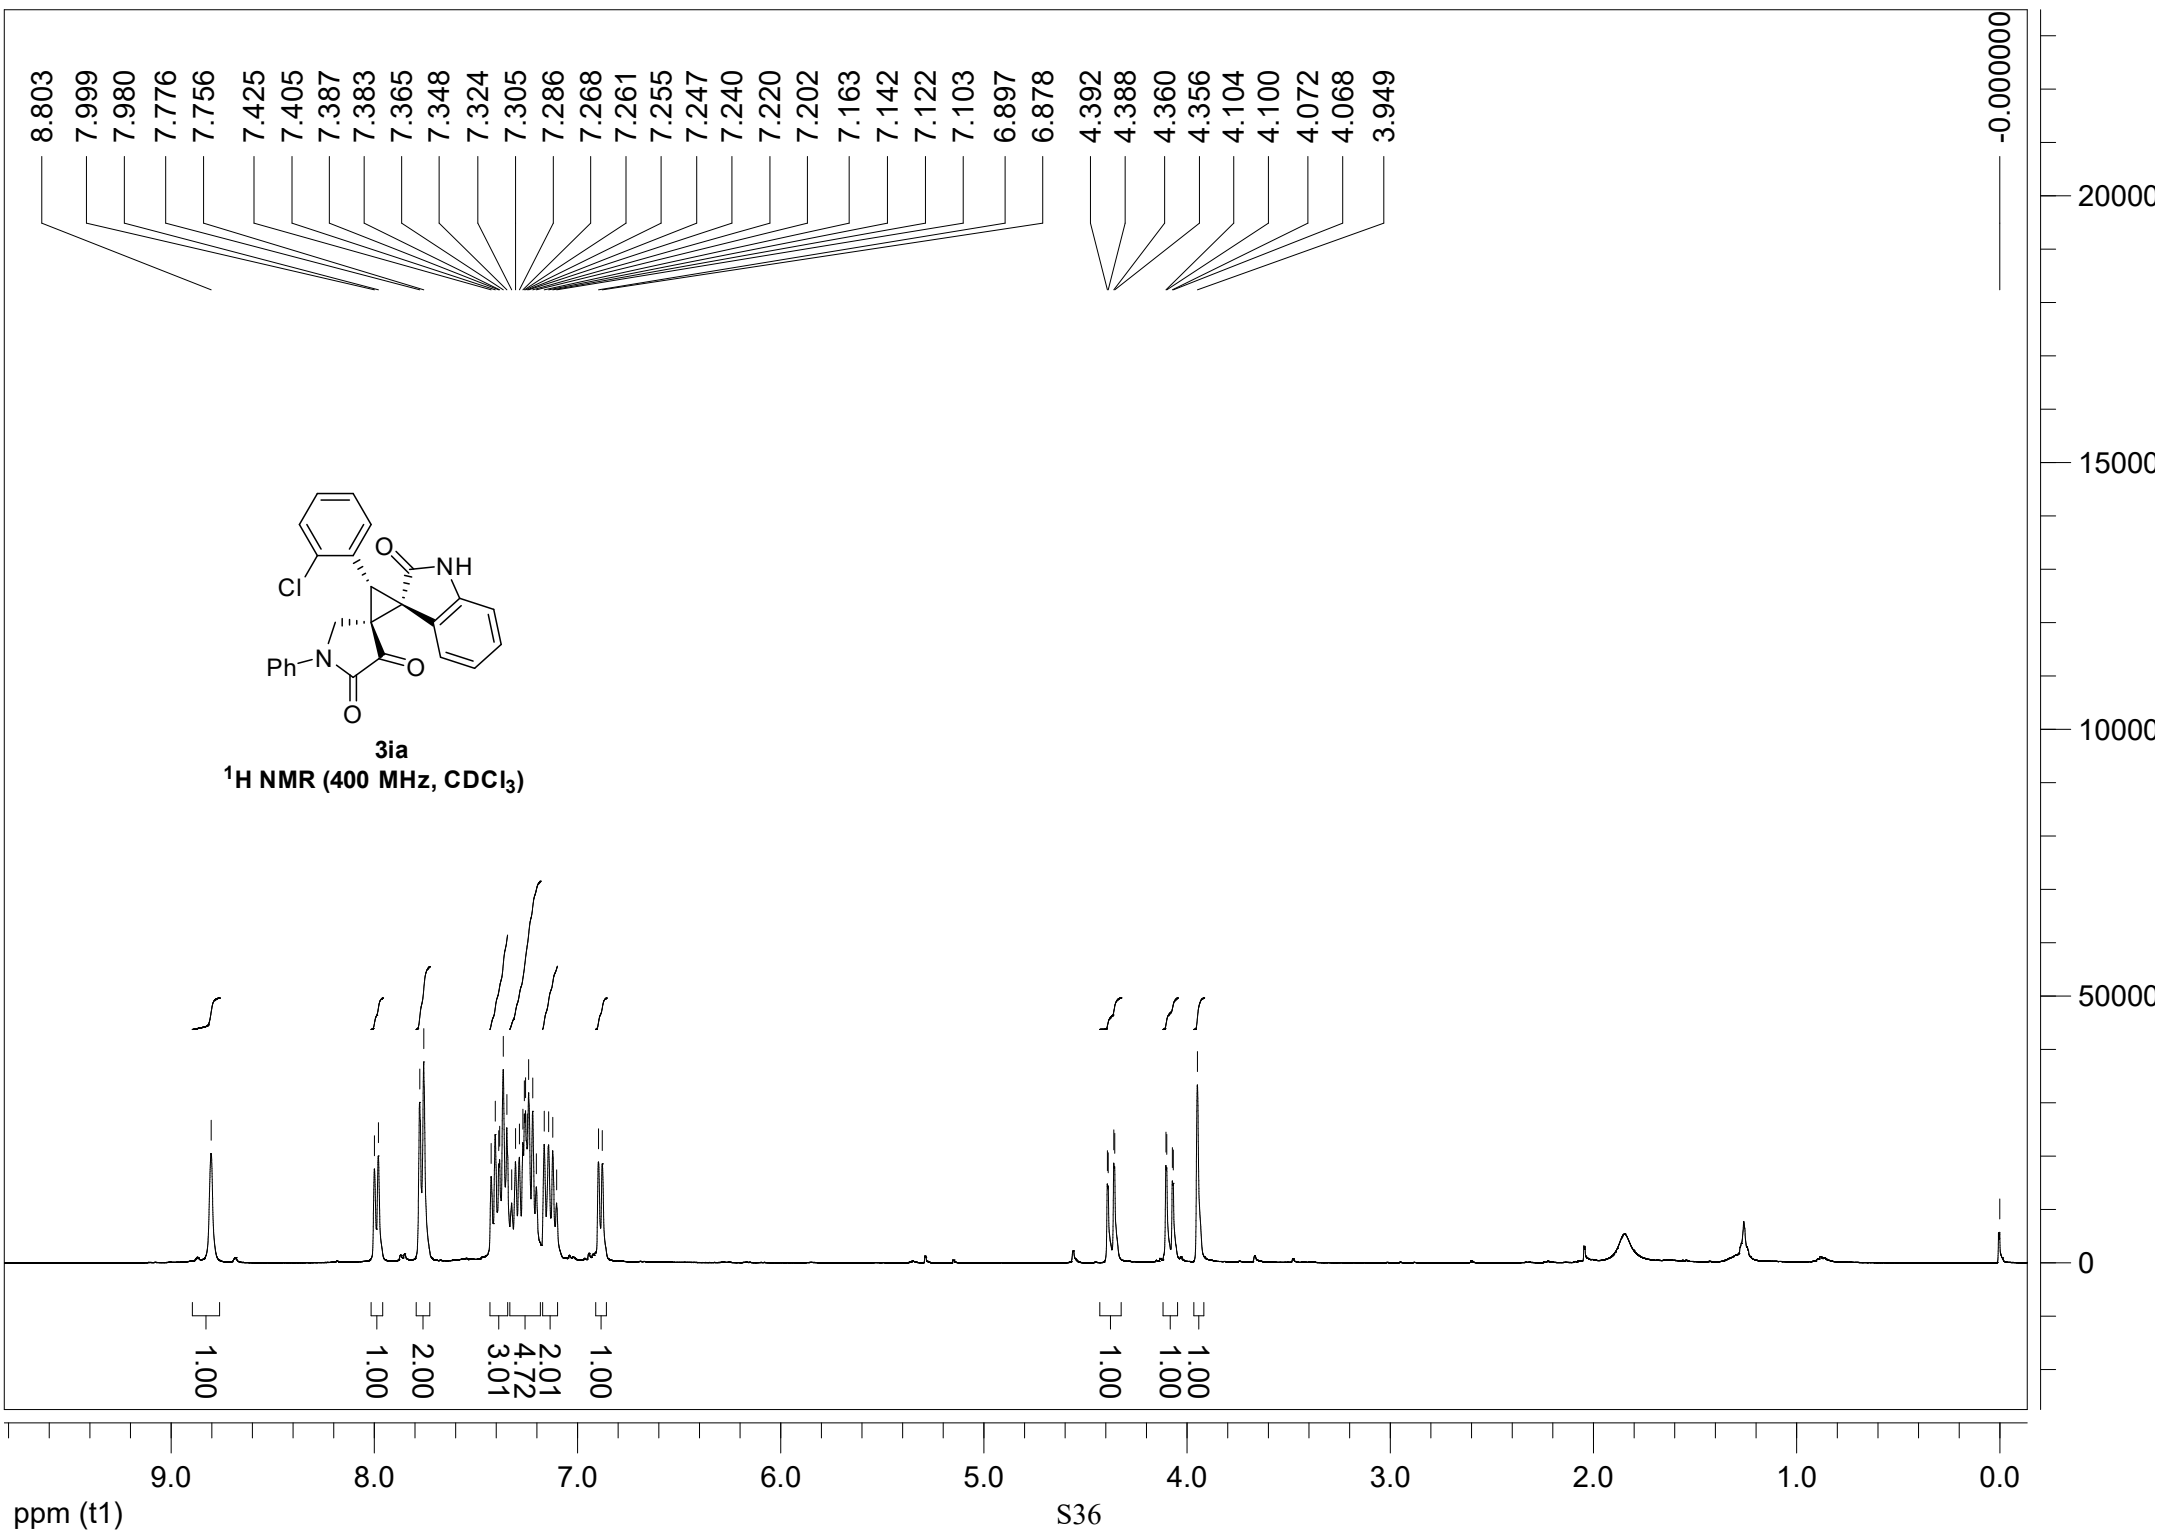

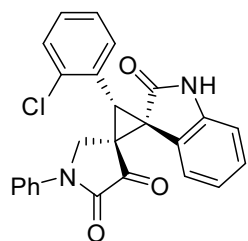

3ia

<sup>13</sup>C NMR (100 MHz, CDCl<sub>3</sub>)

193.838

172.030

157.299

140.571

138.308

135.372

131.917

129.867

129.810

129.195

128.811

127.676

126.882

126.664

125.133

124.595

122.787

119.602

109.967

77.318

77.000

76.682

45.933

44.430

42.732

42.589

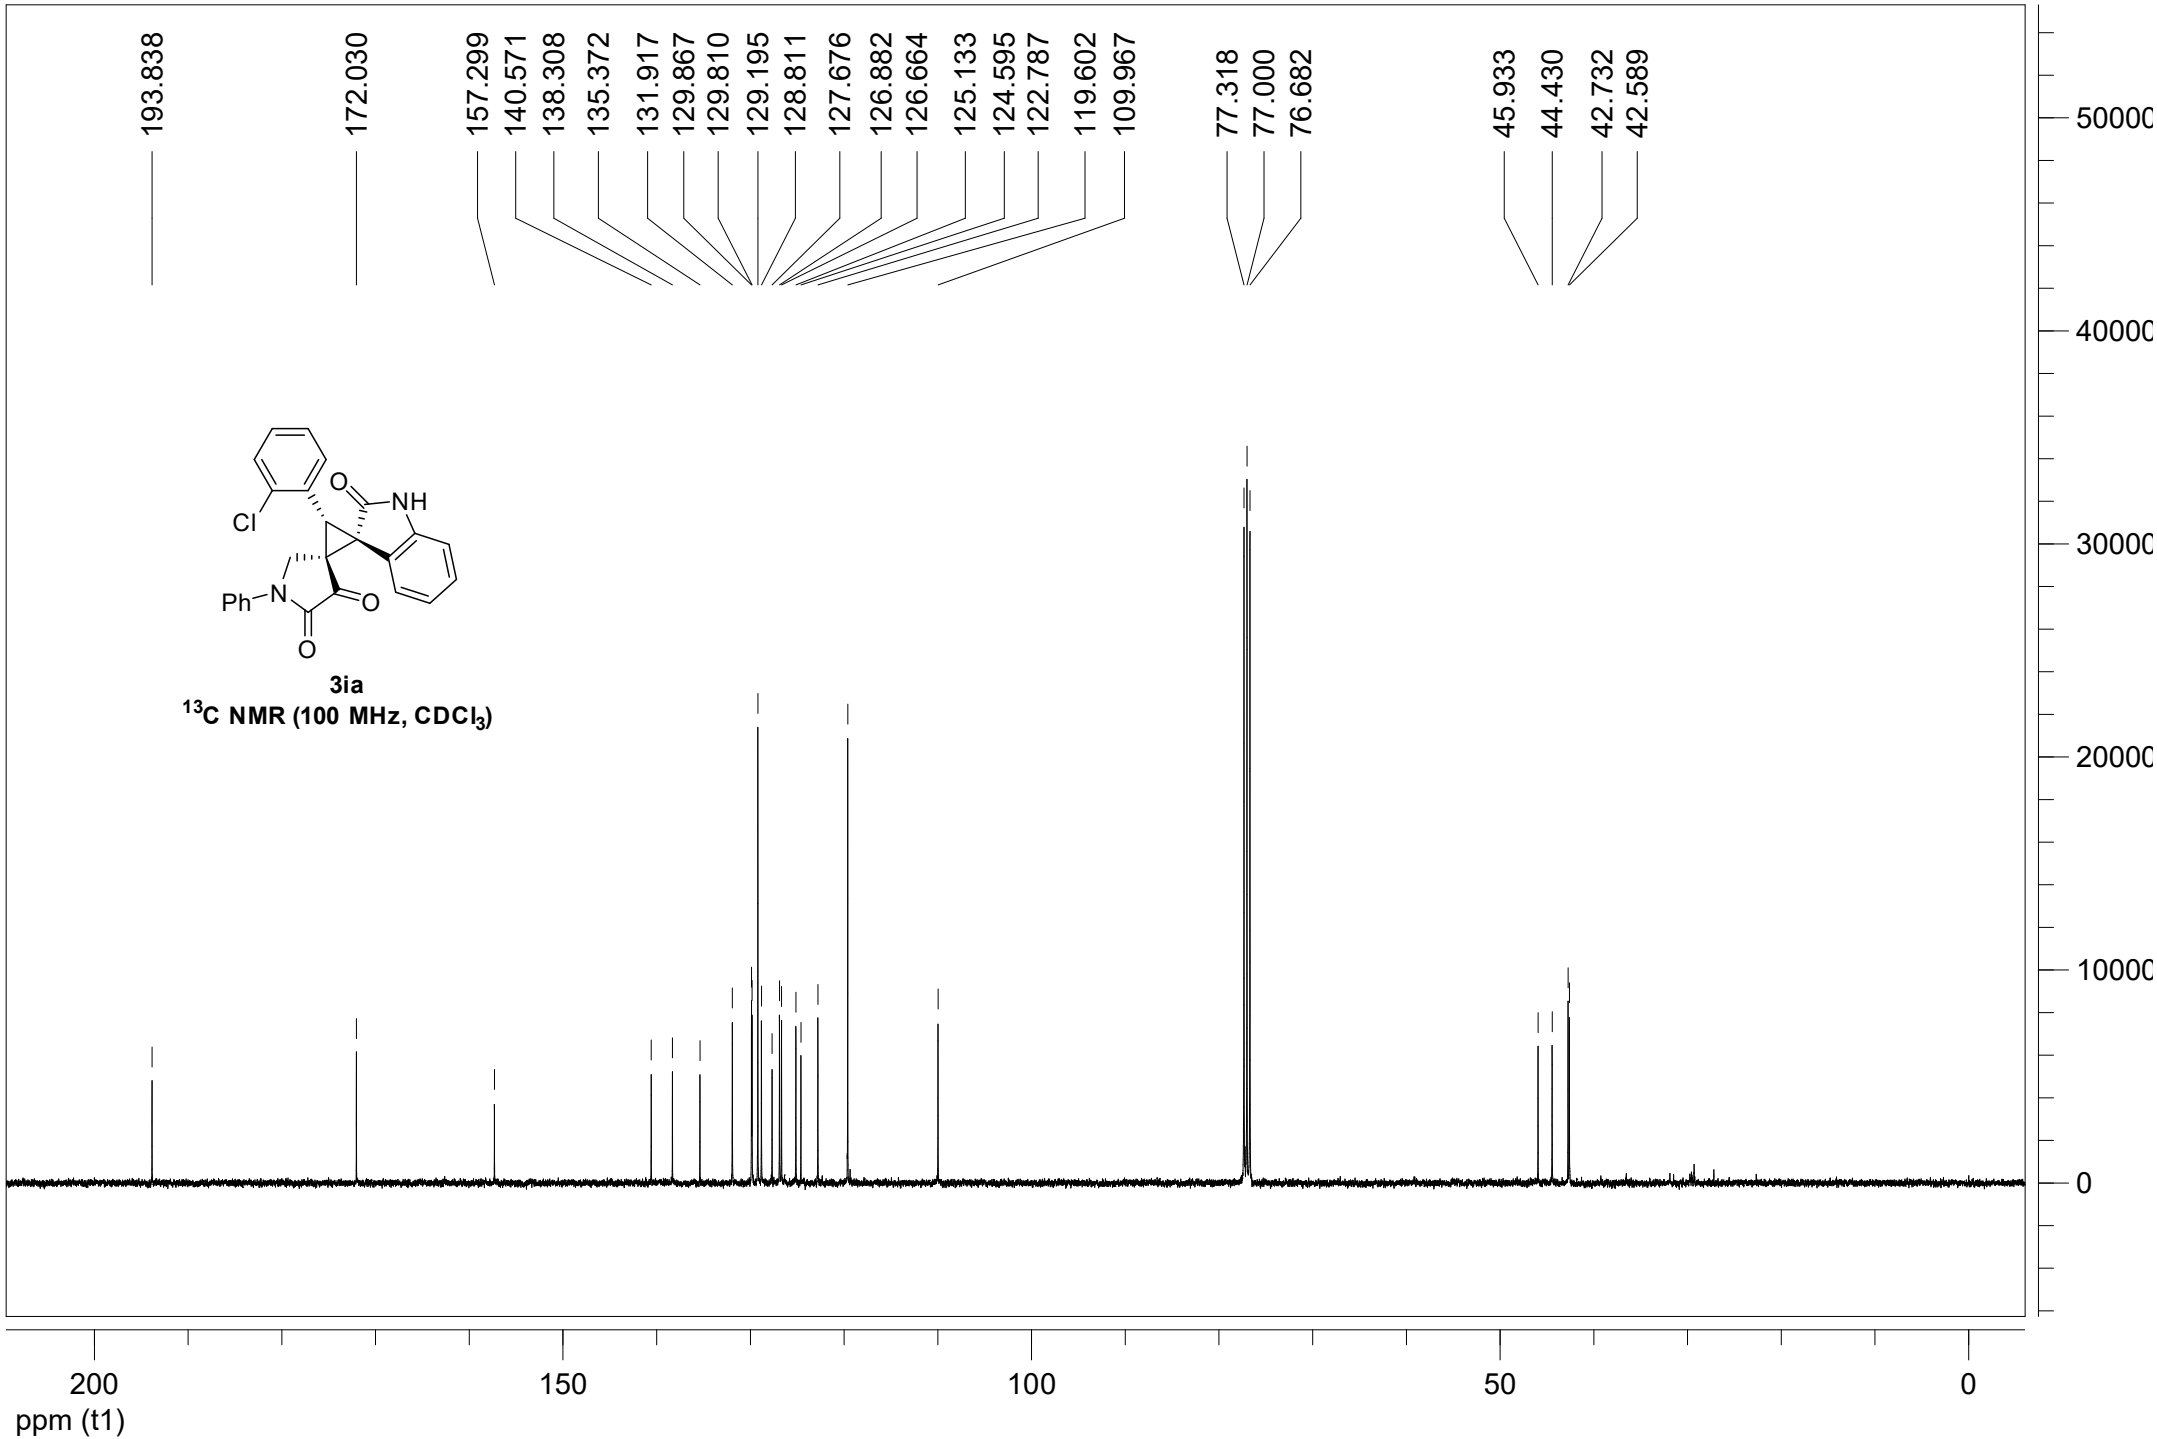

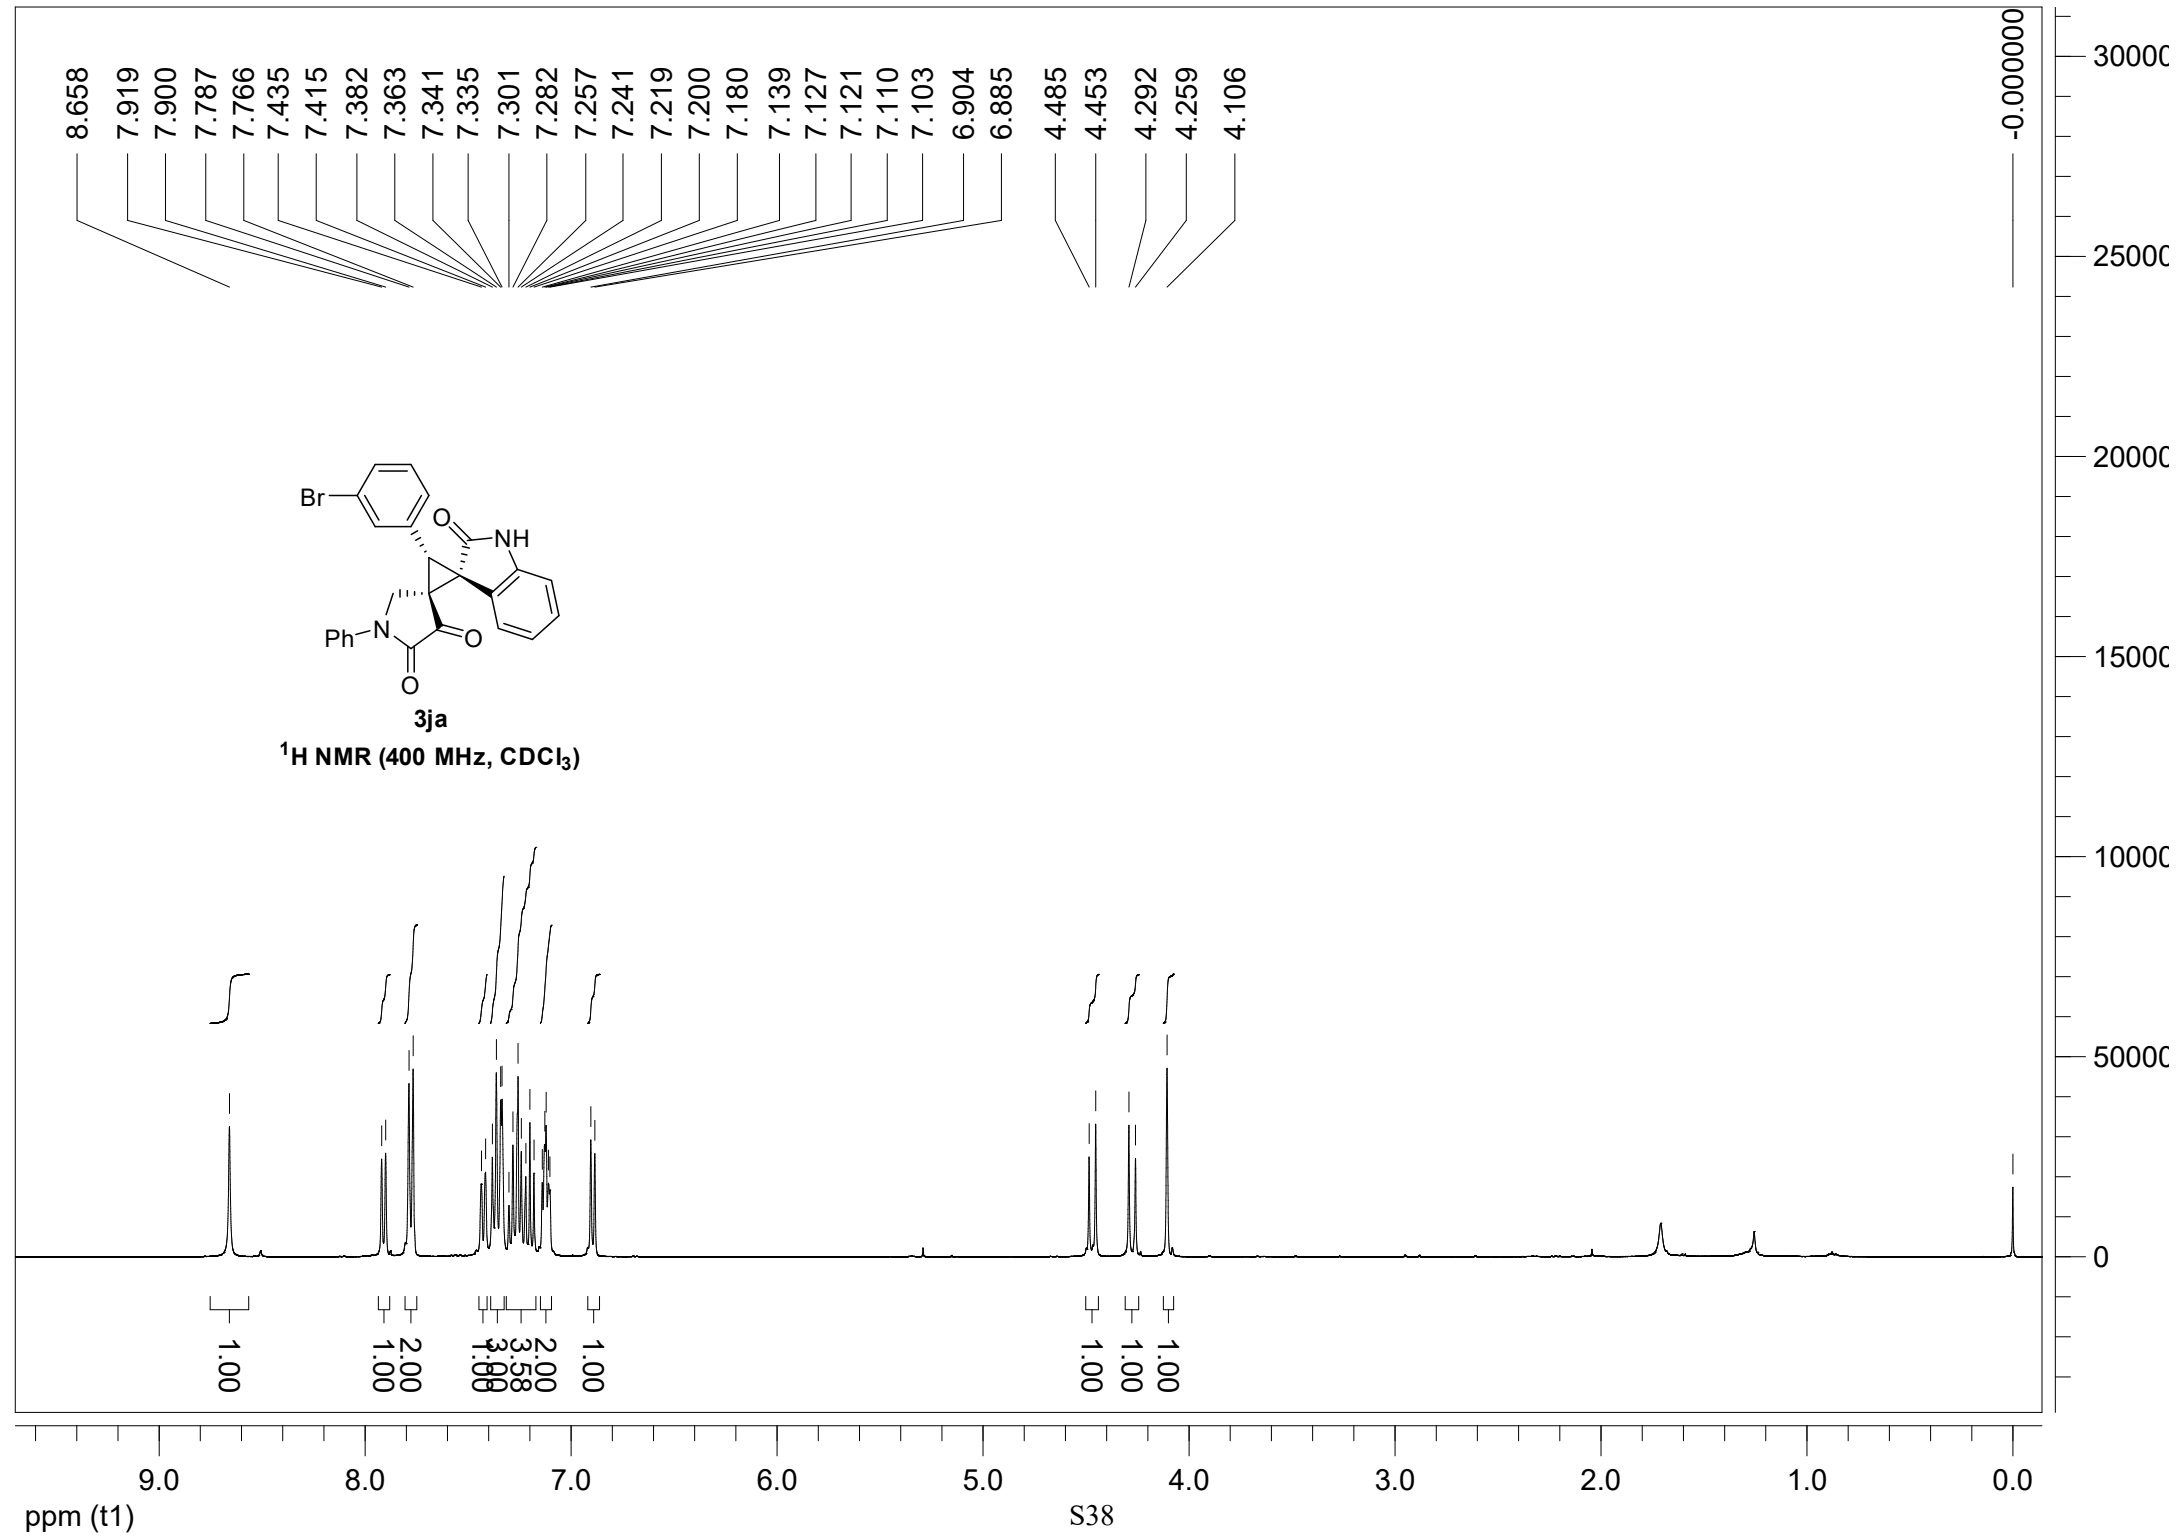

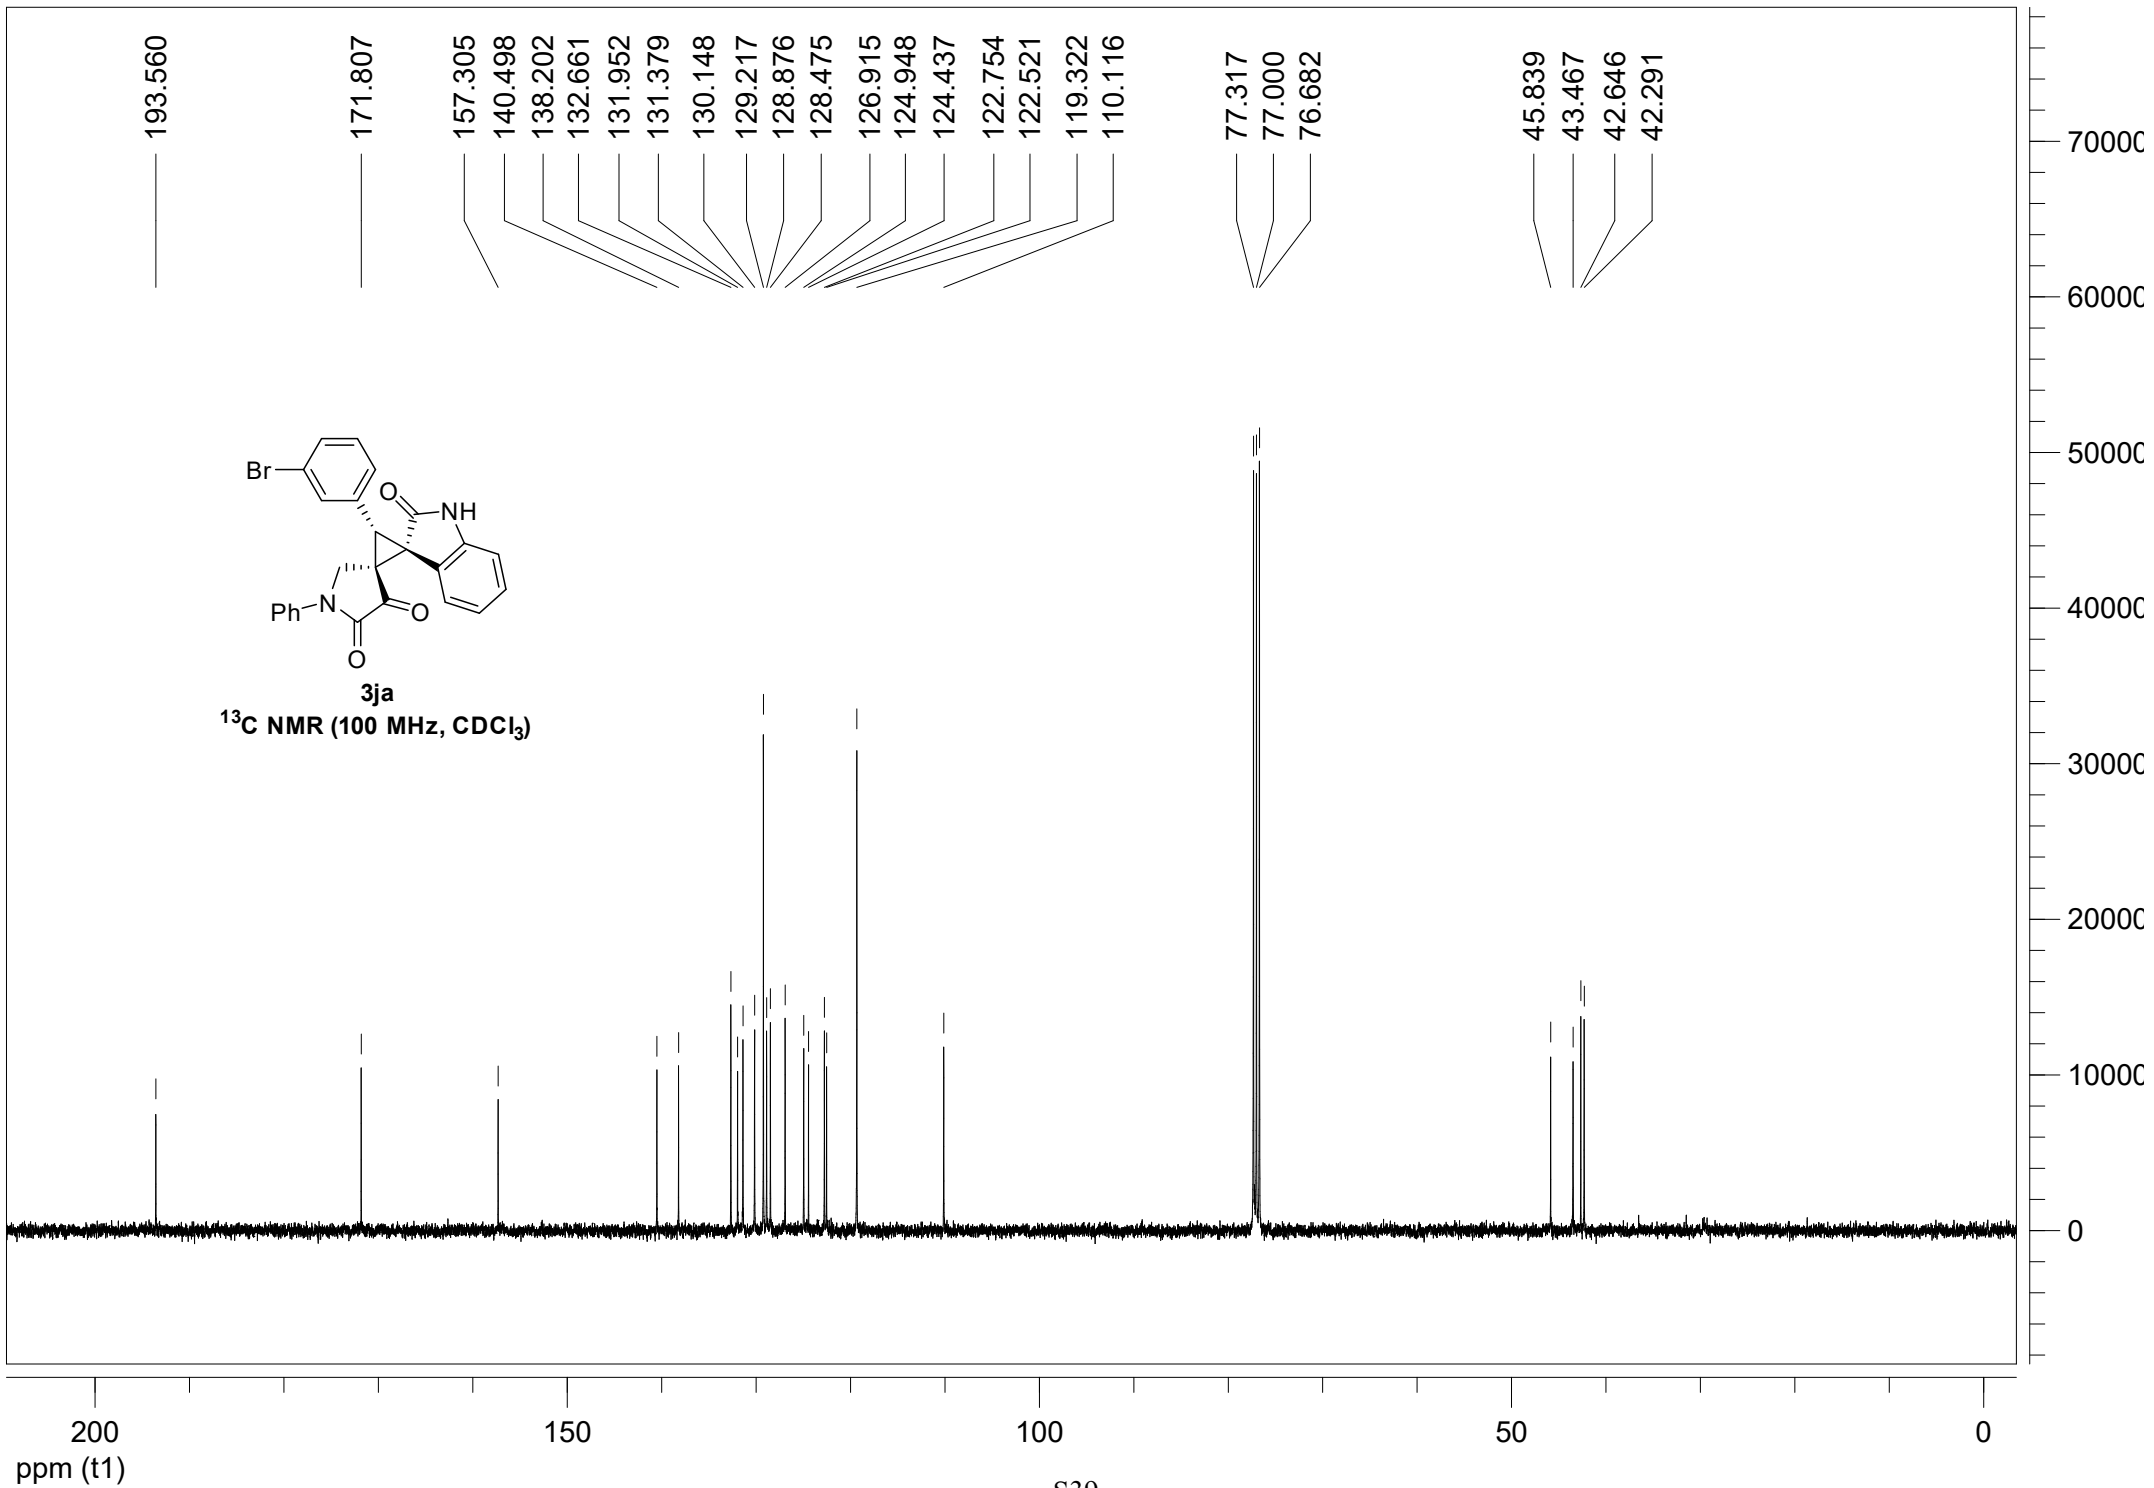



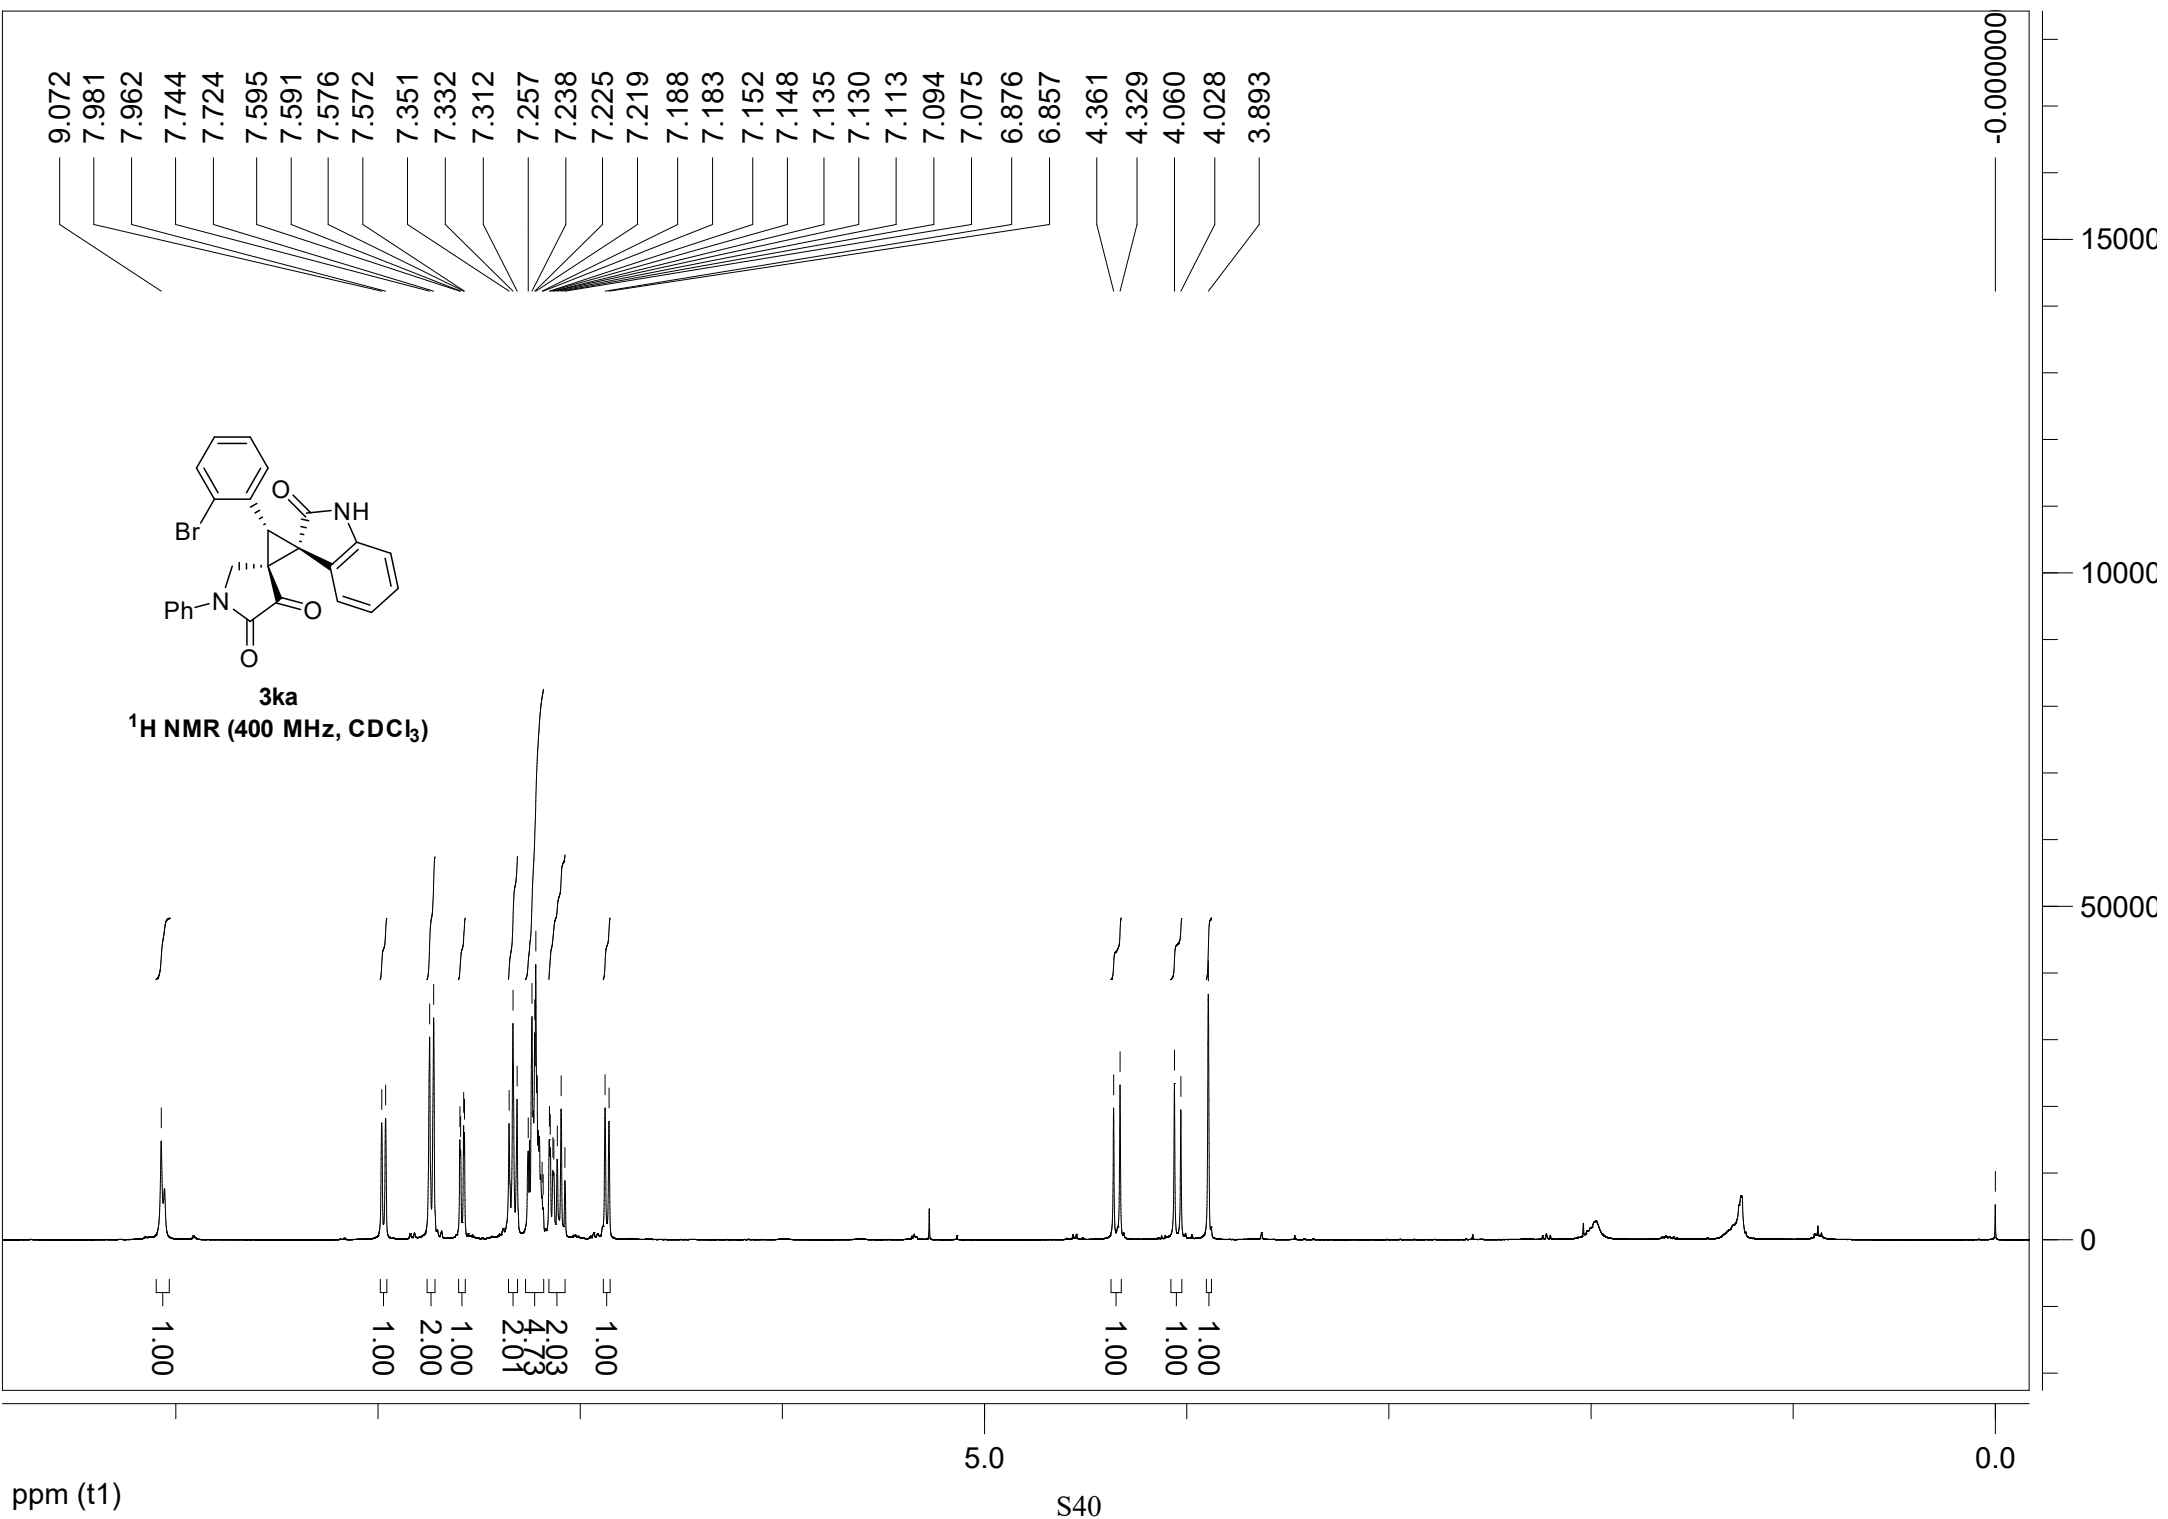

ppm (t1)

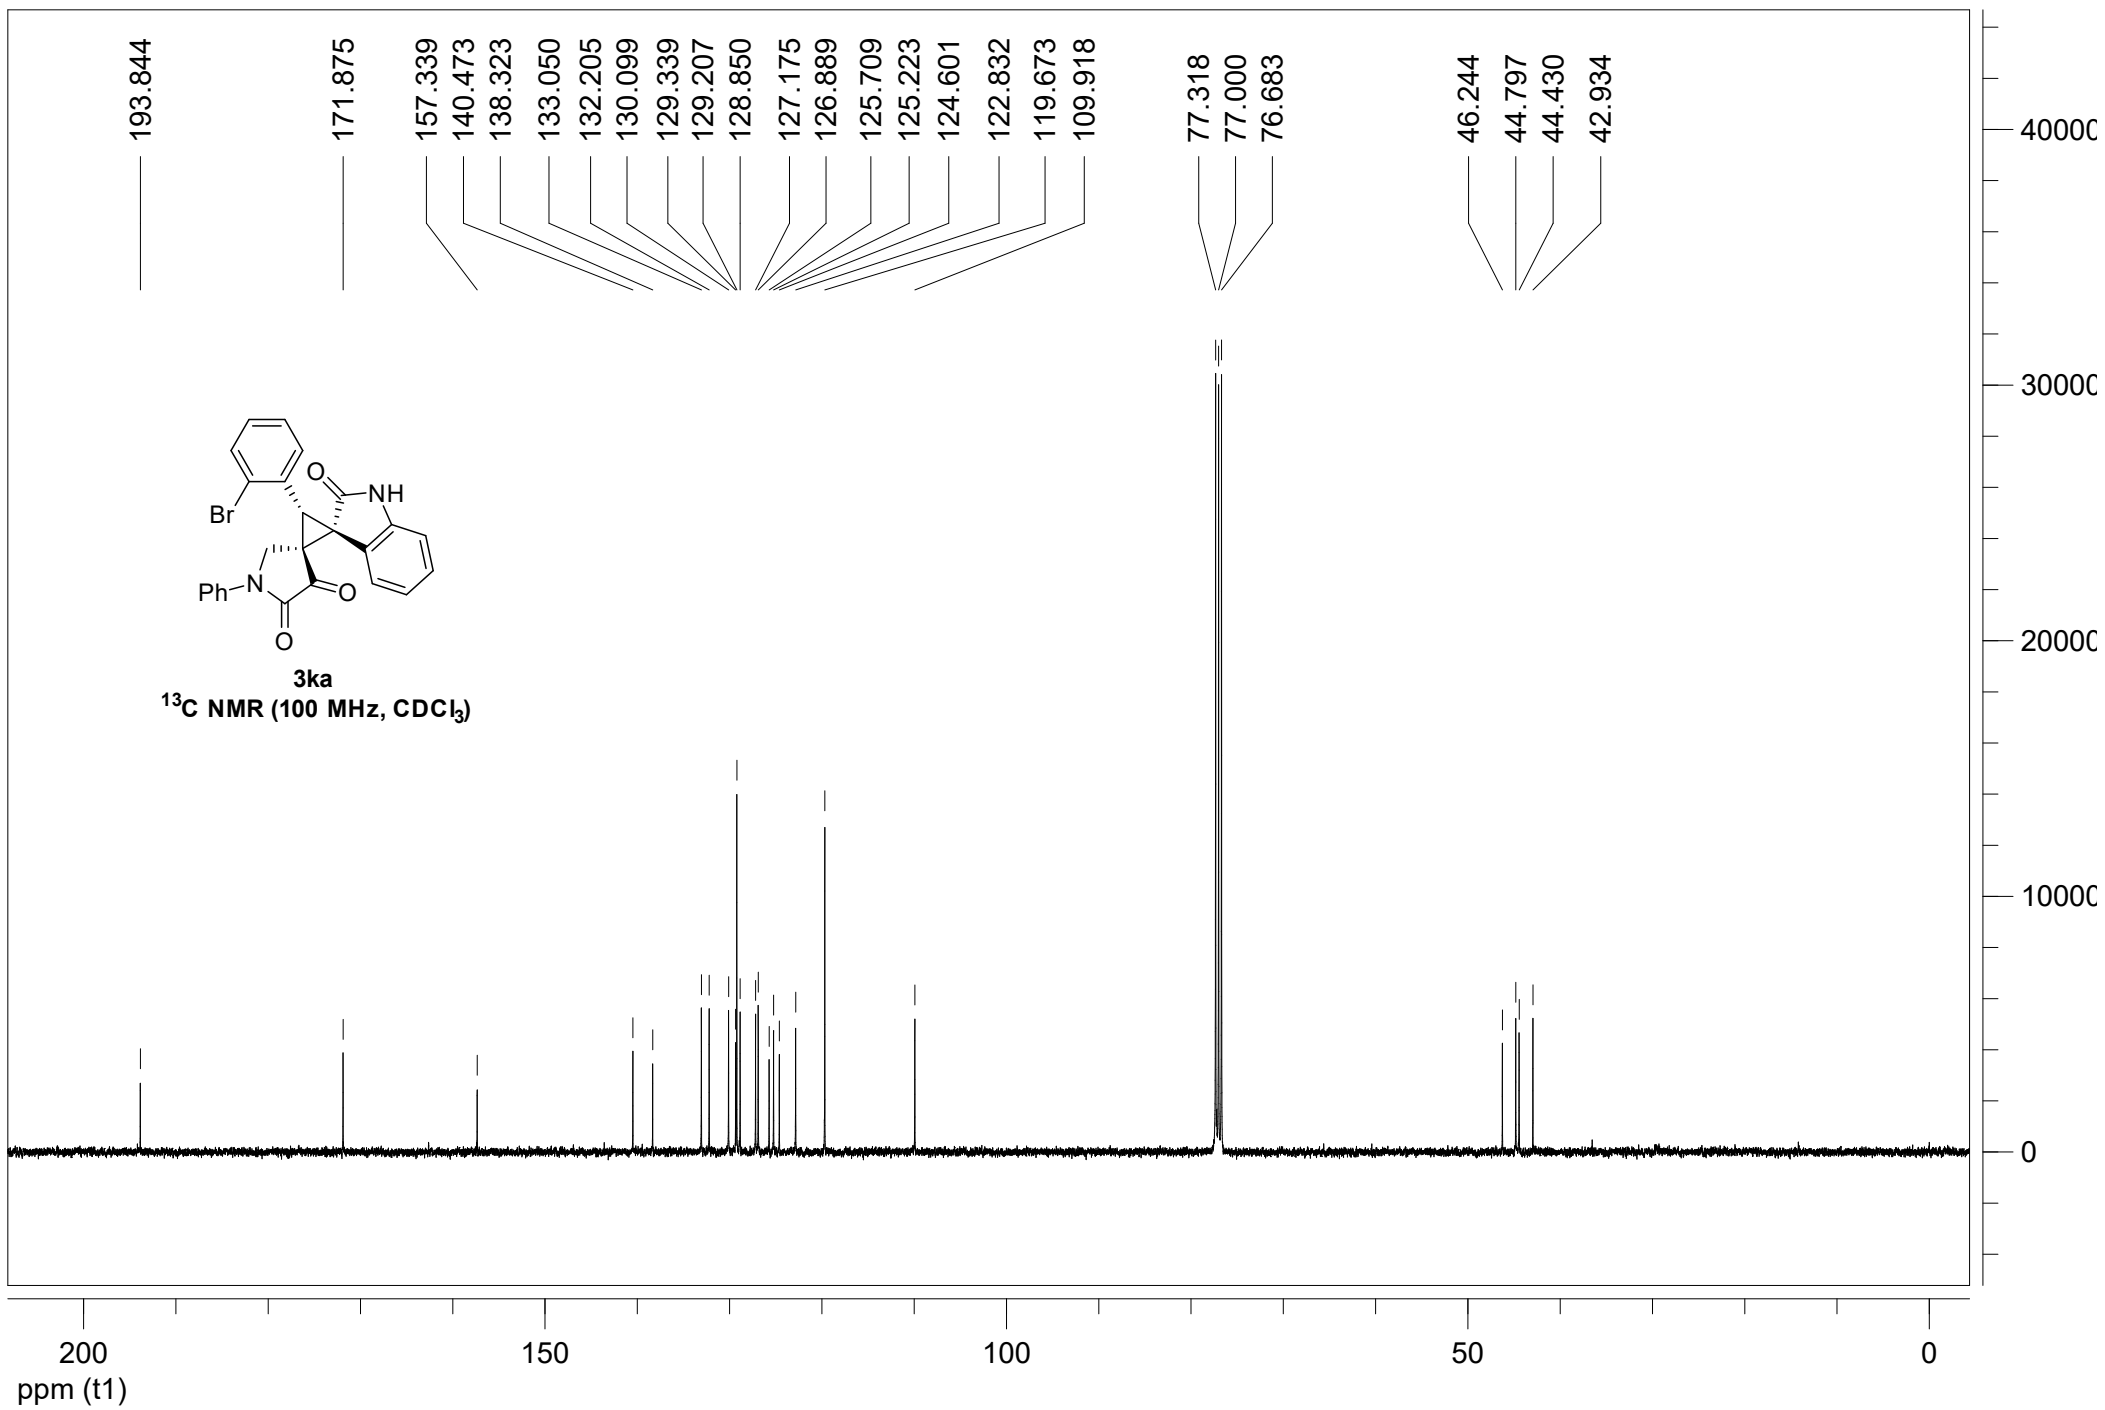

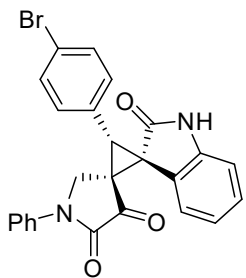

**3la**  
<sup>1</sup>H NMR (400 MHz, CDCl<sub>3</sub>)

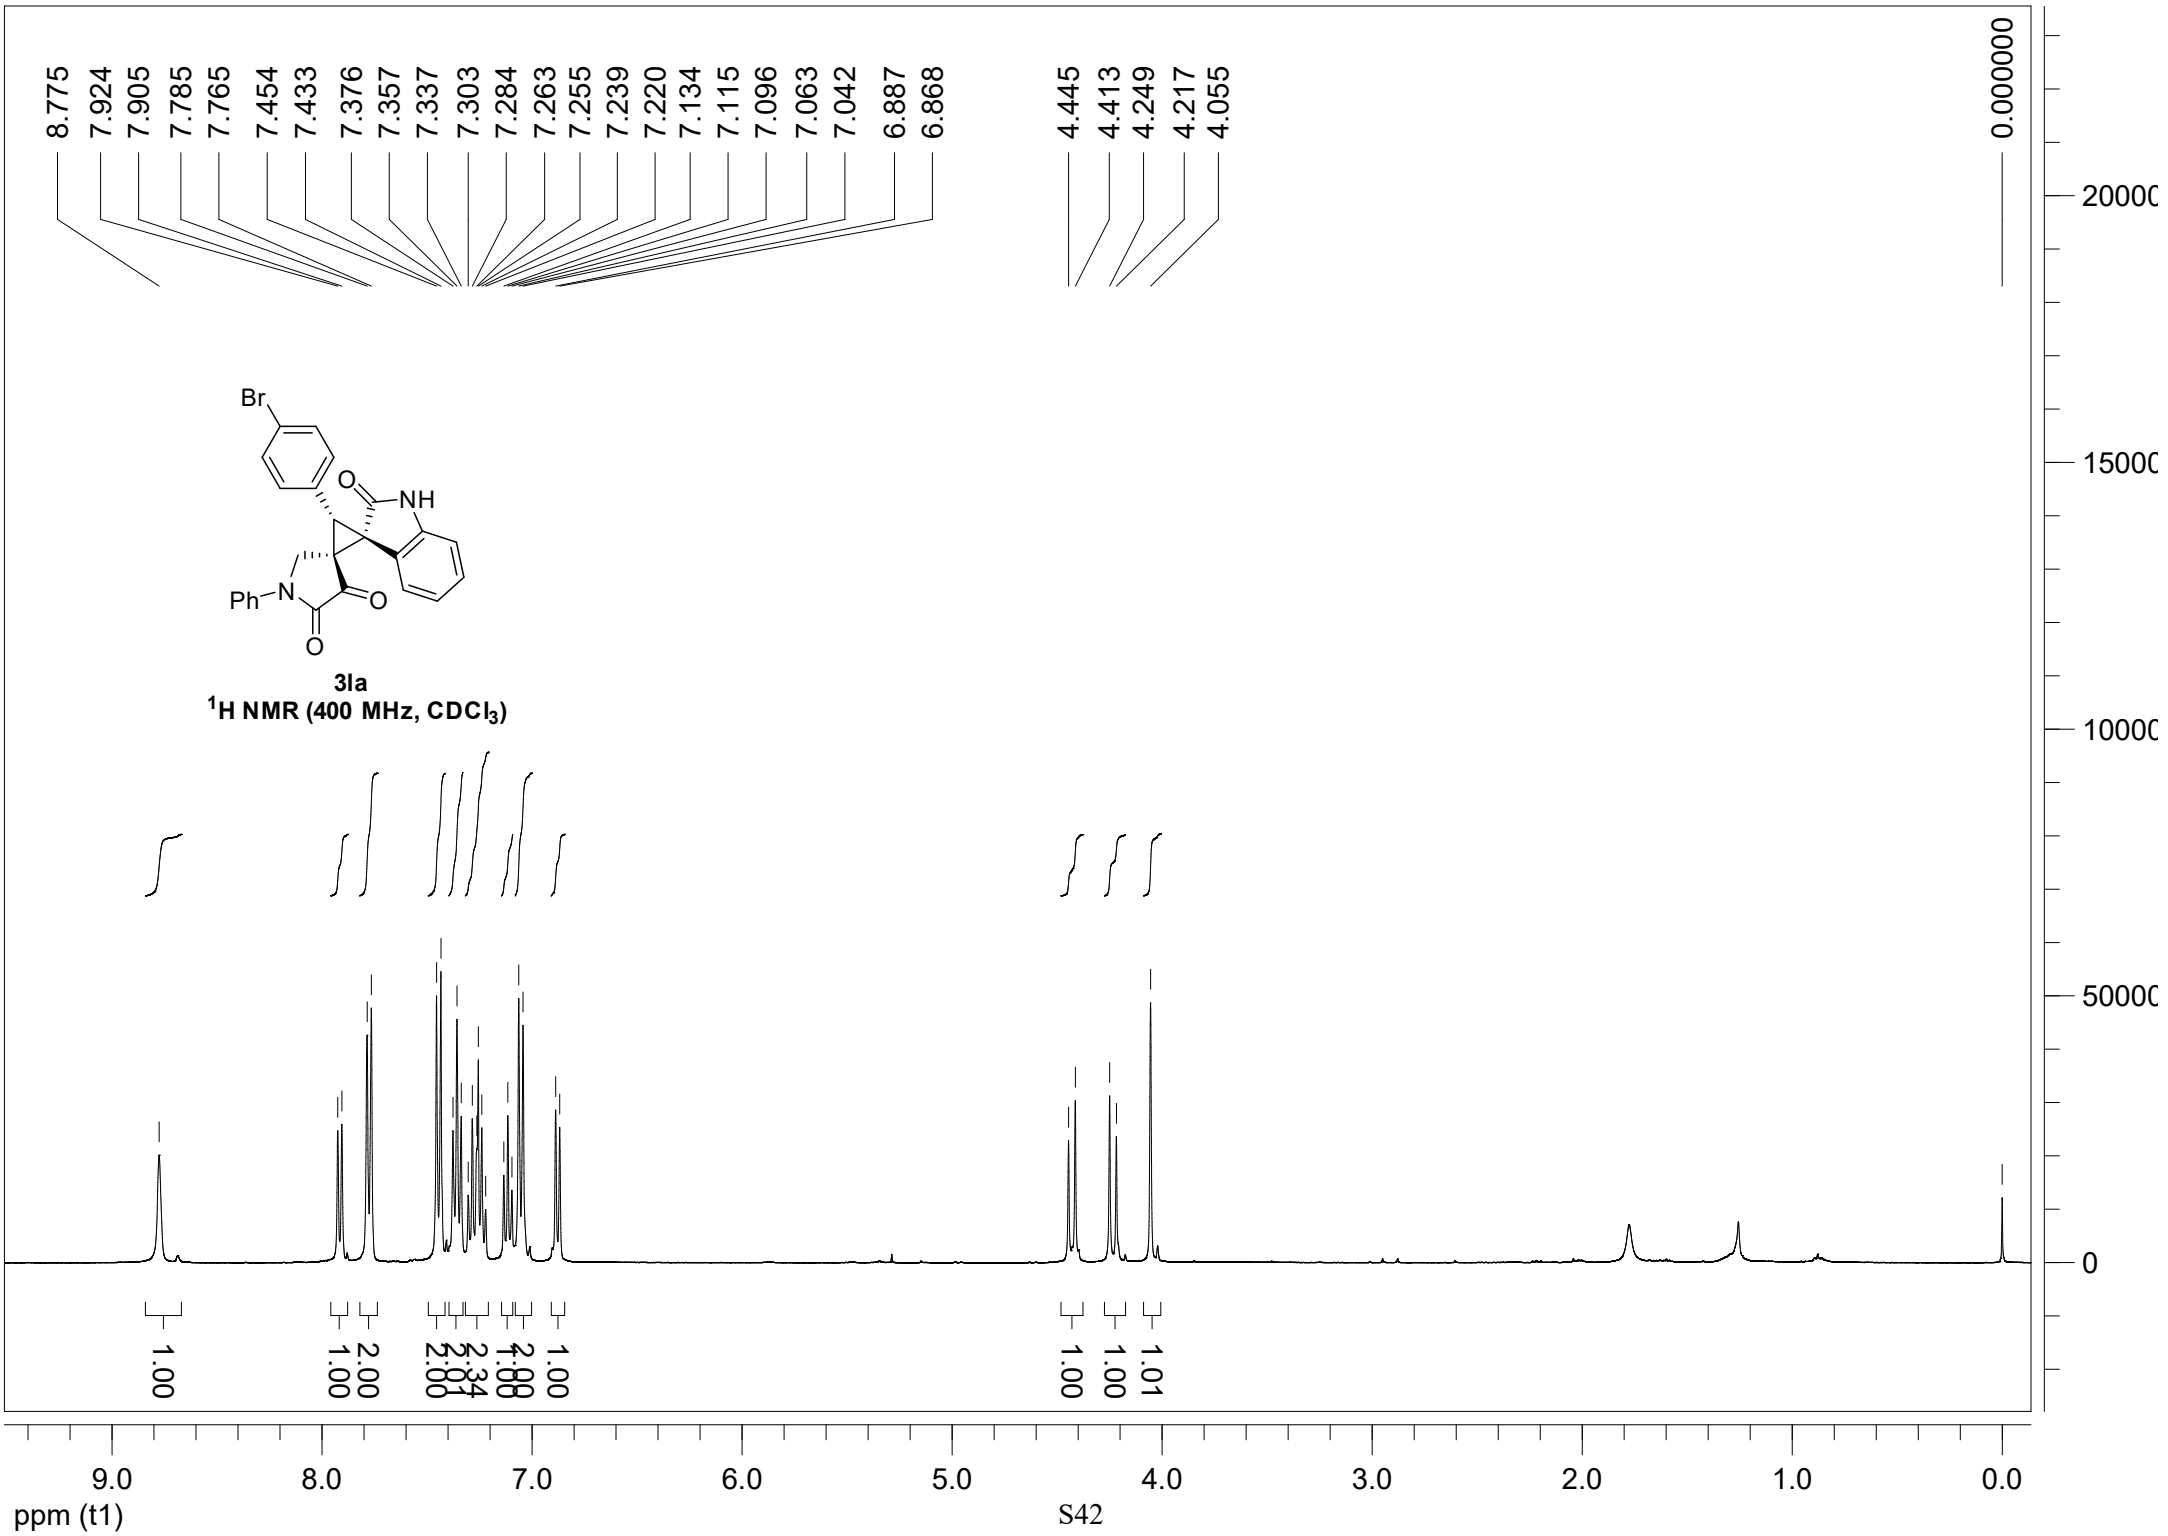

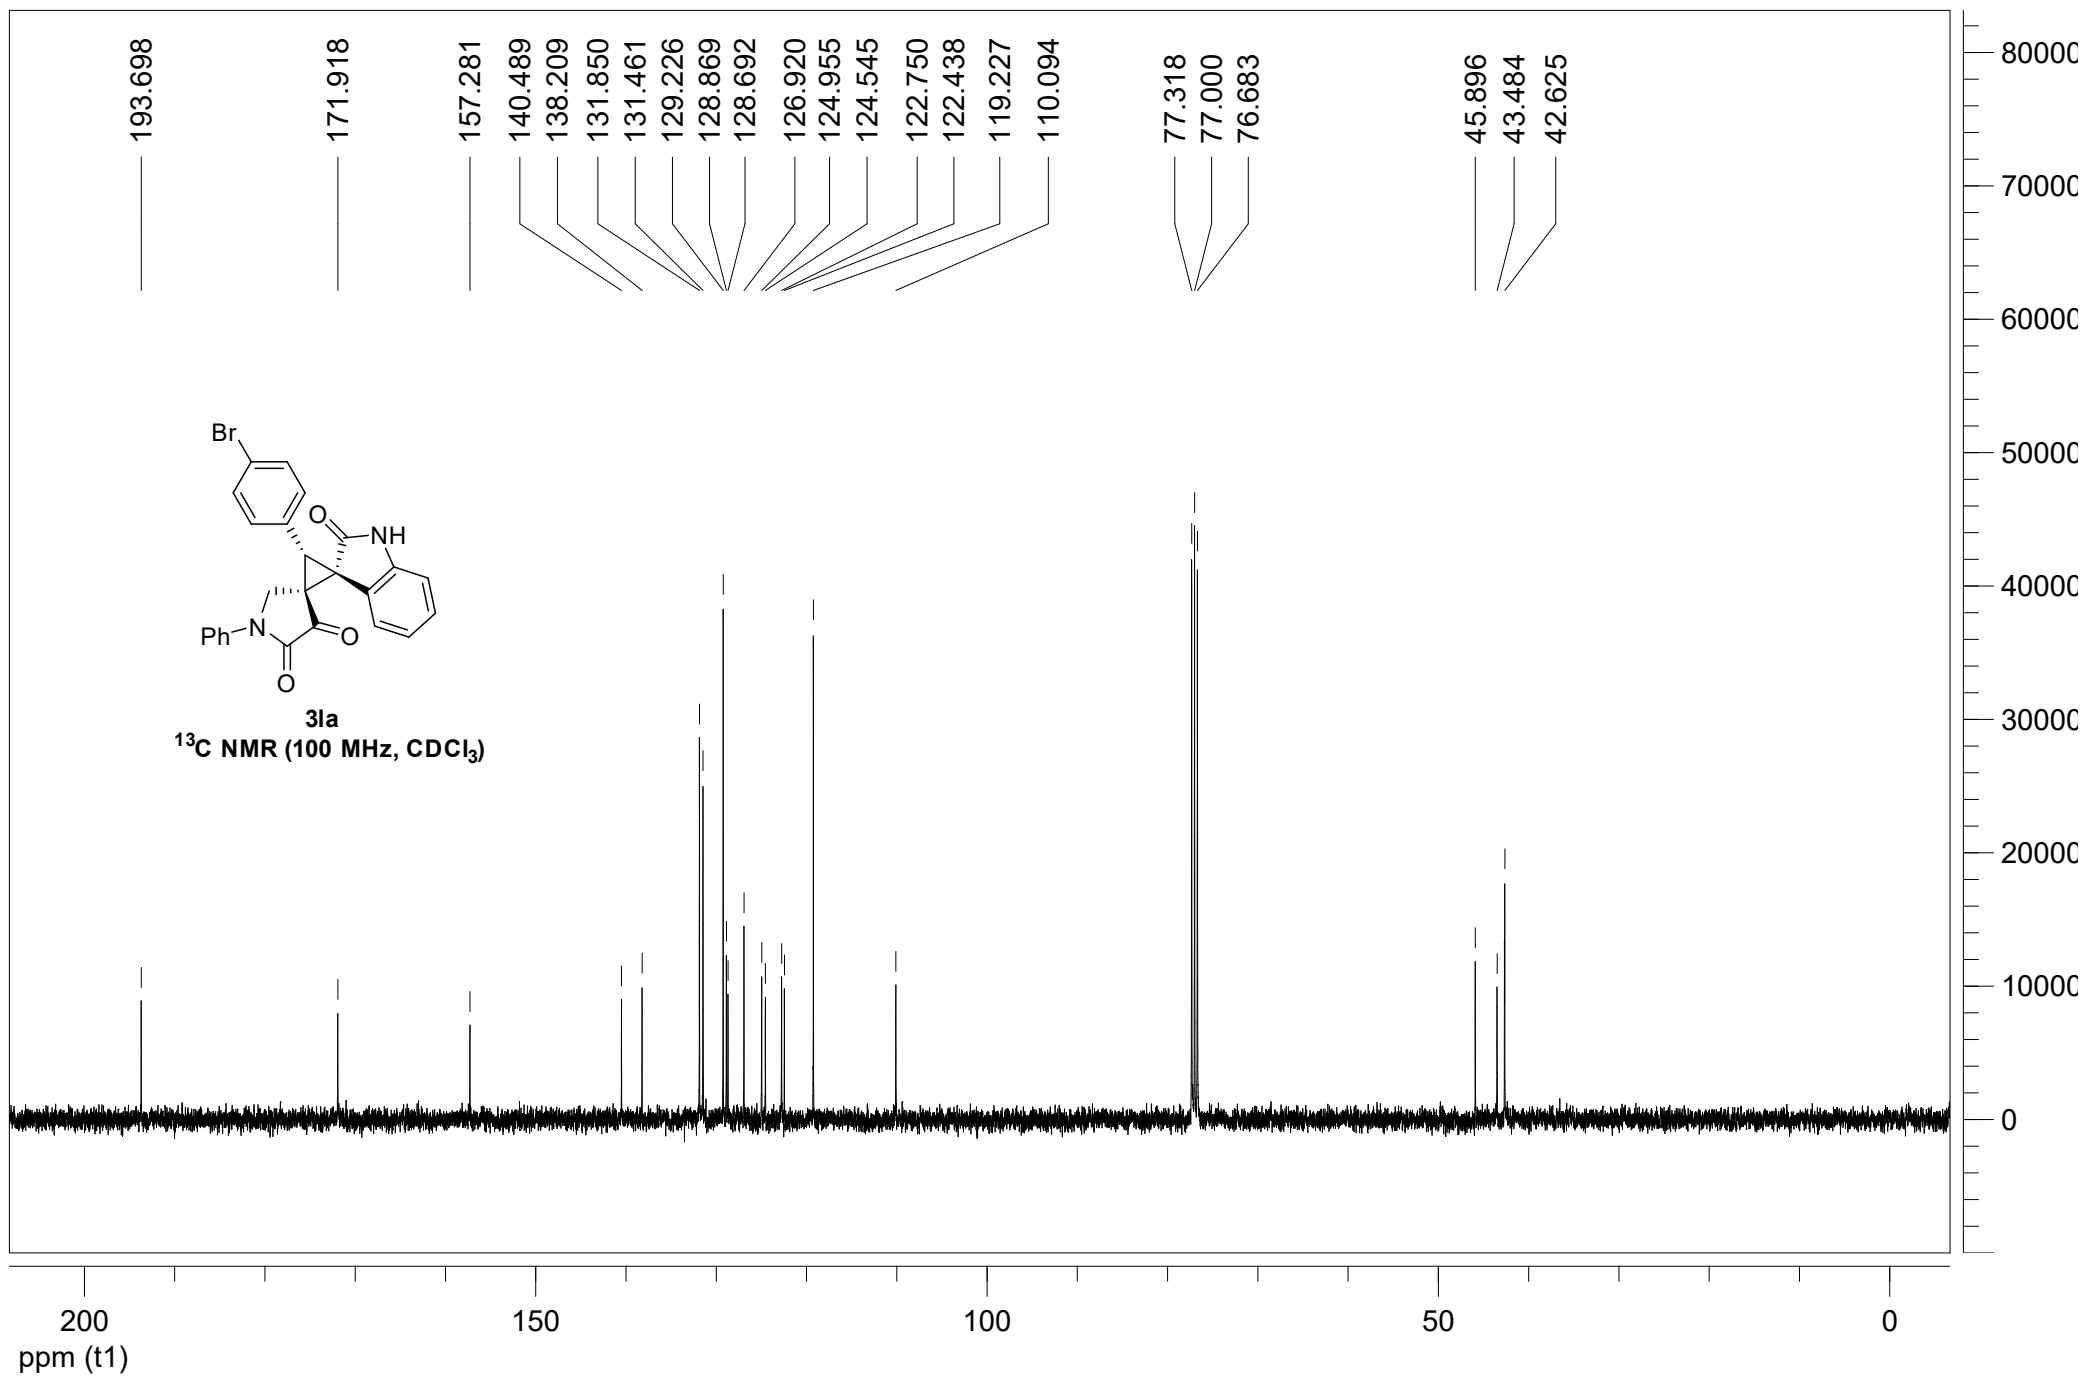

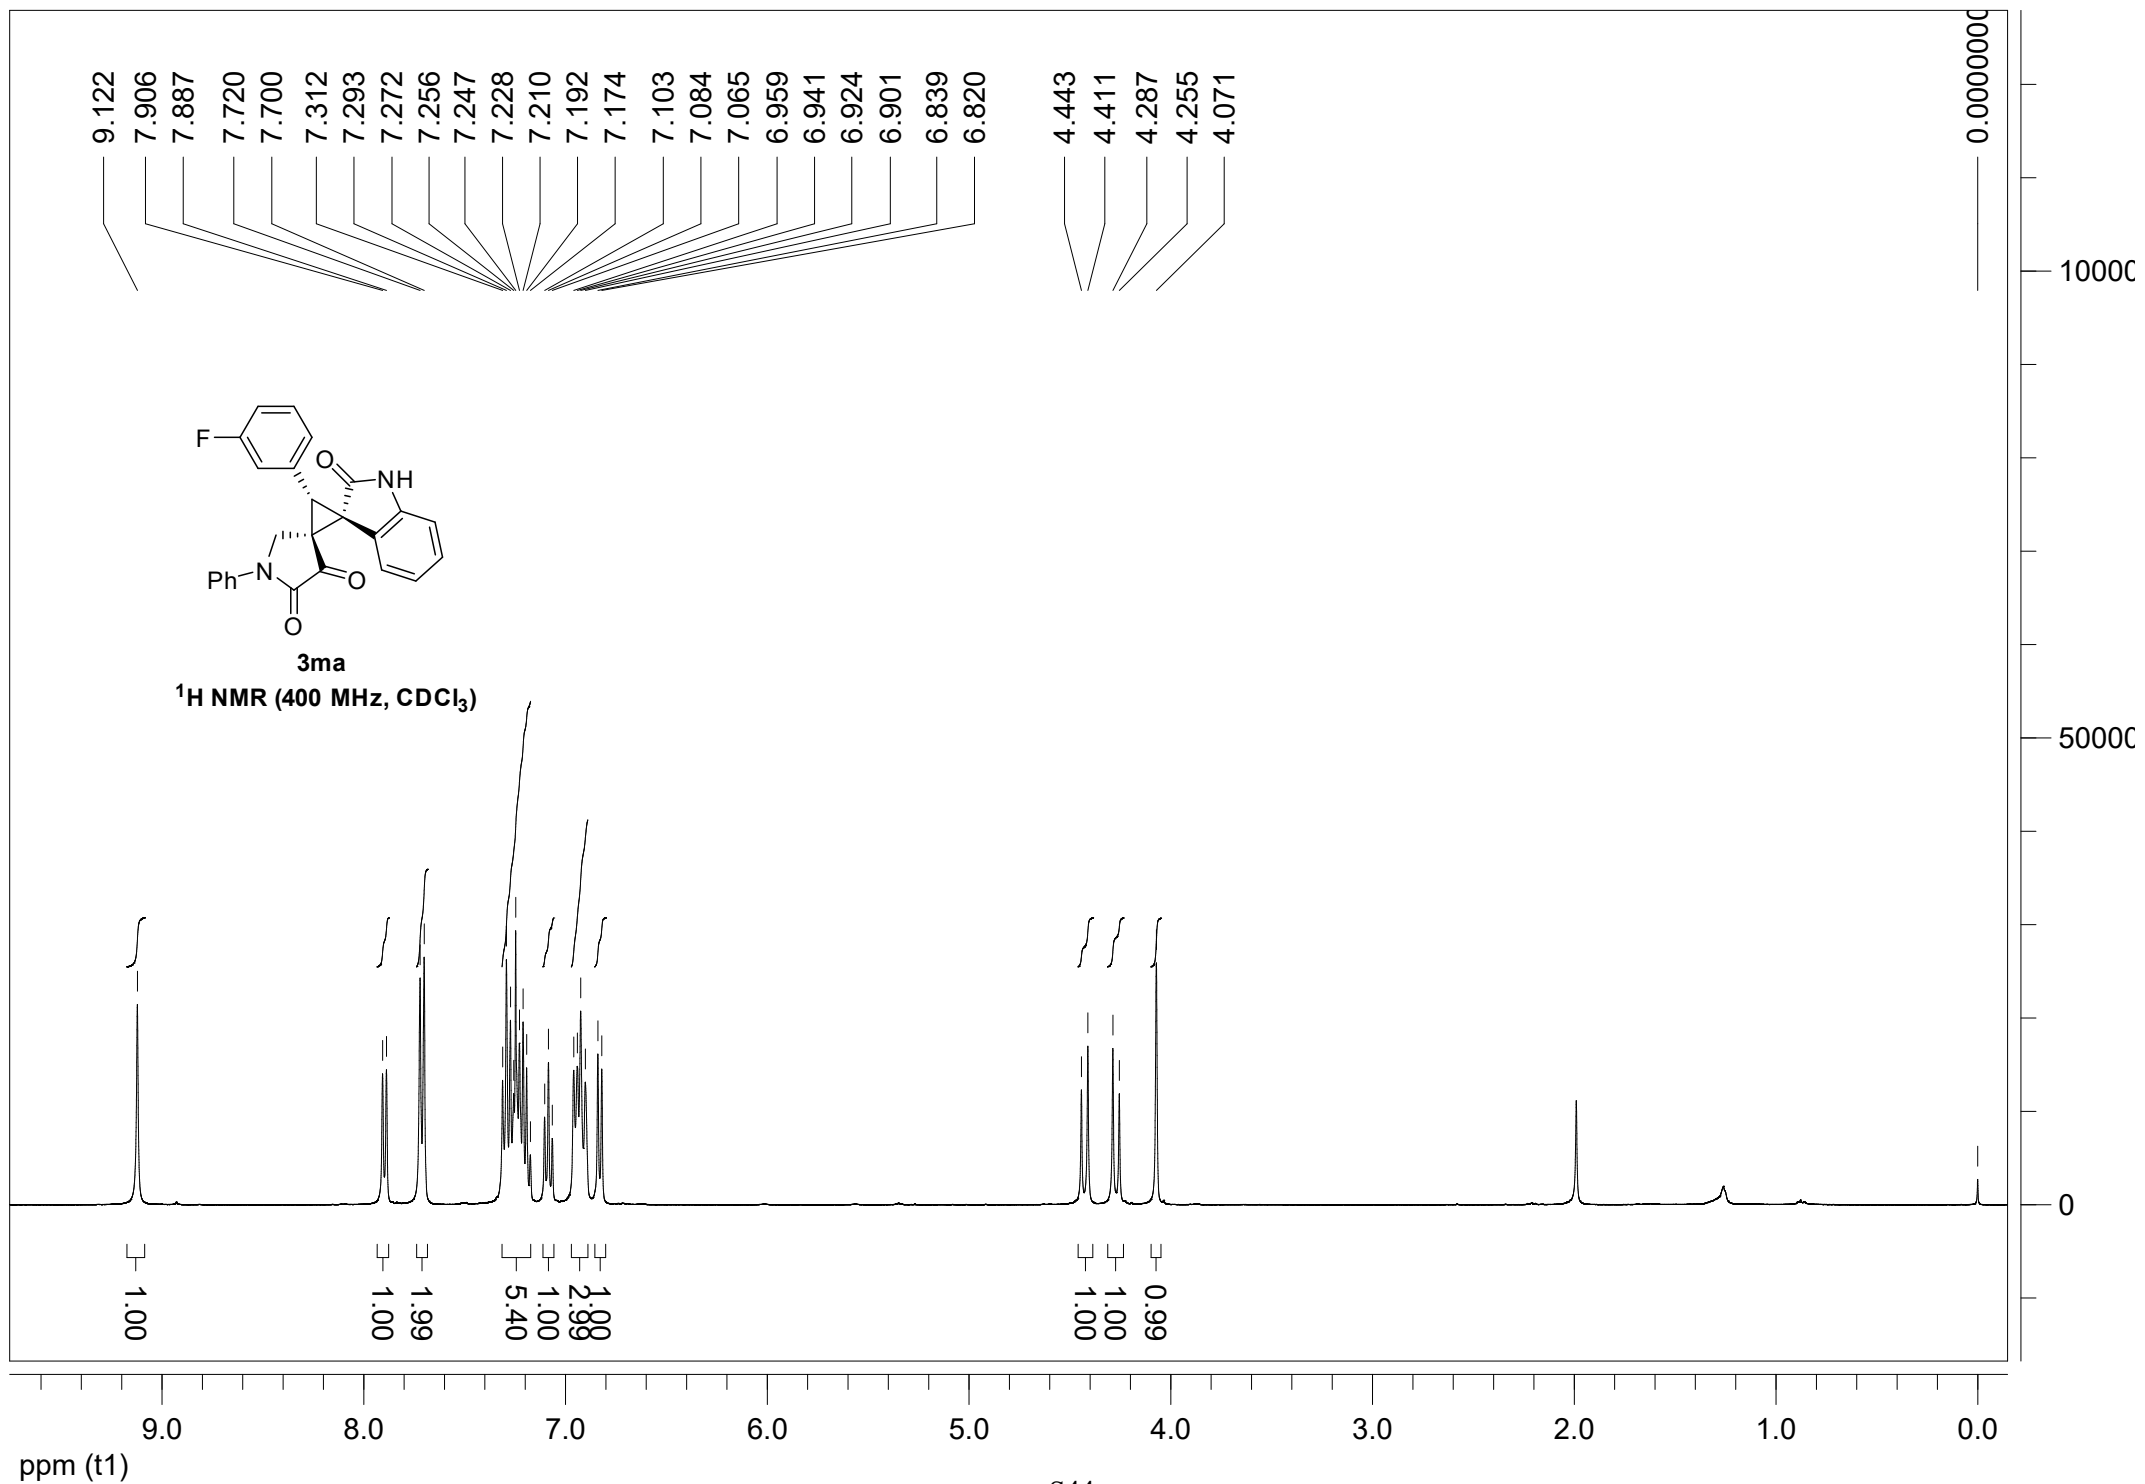

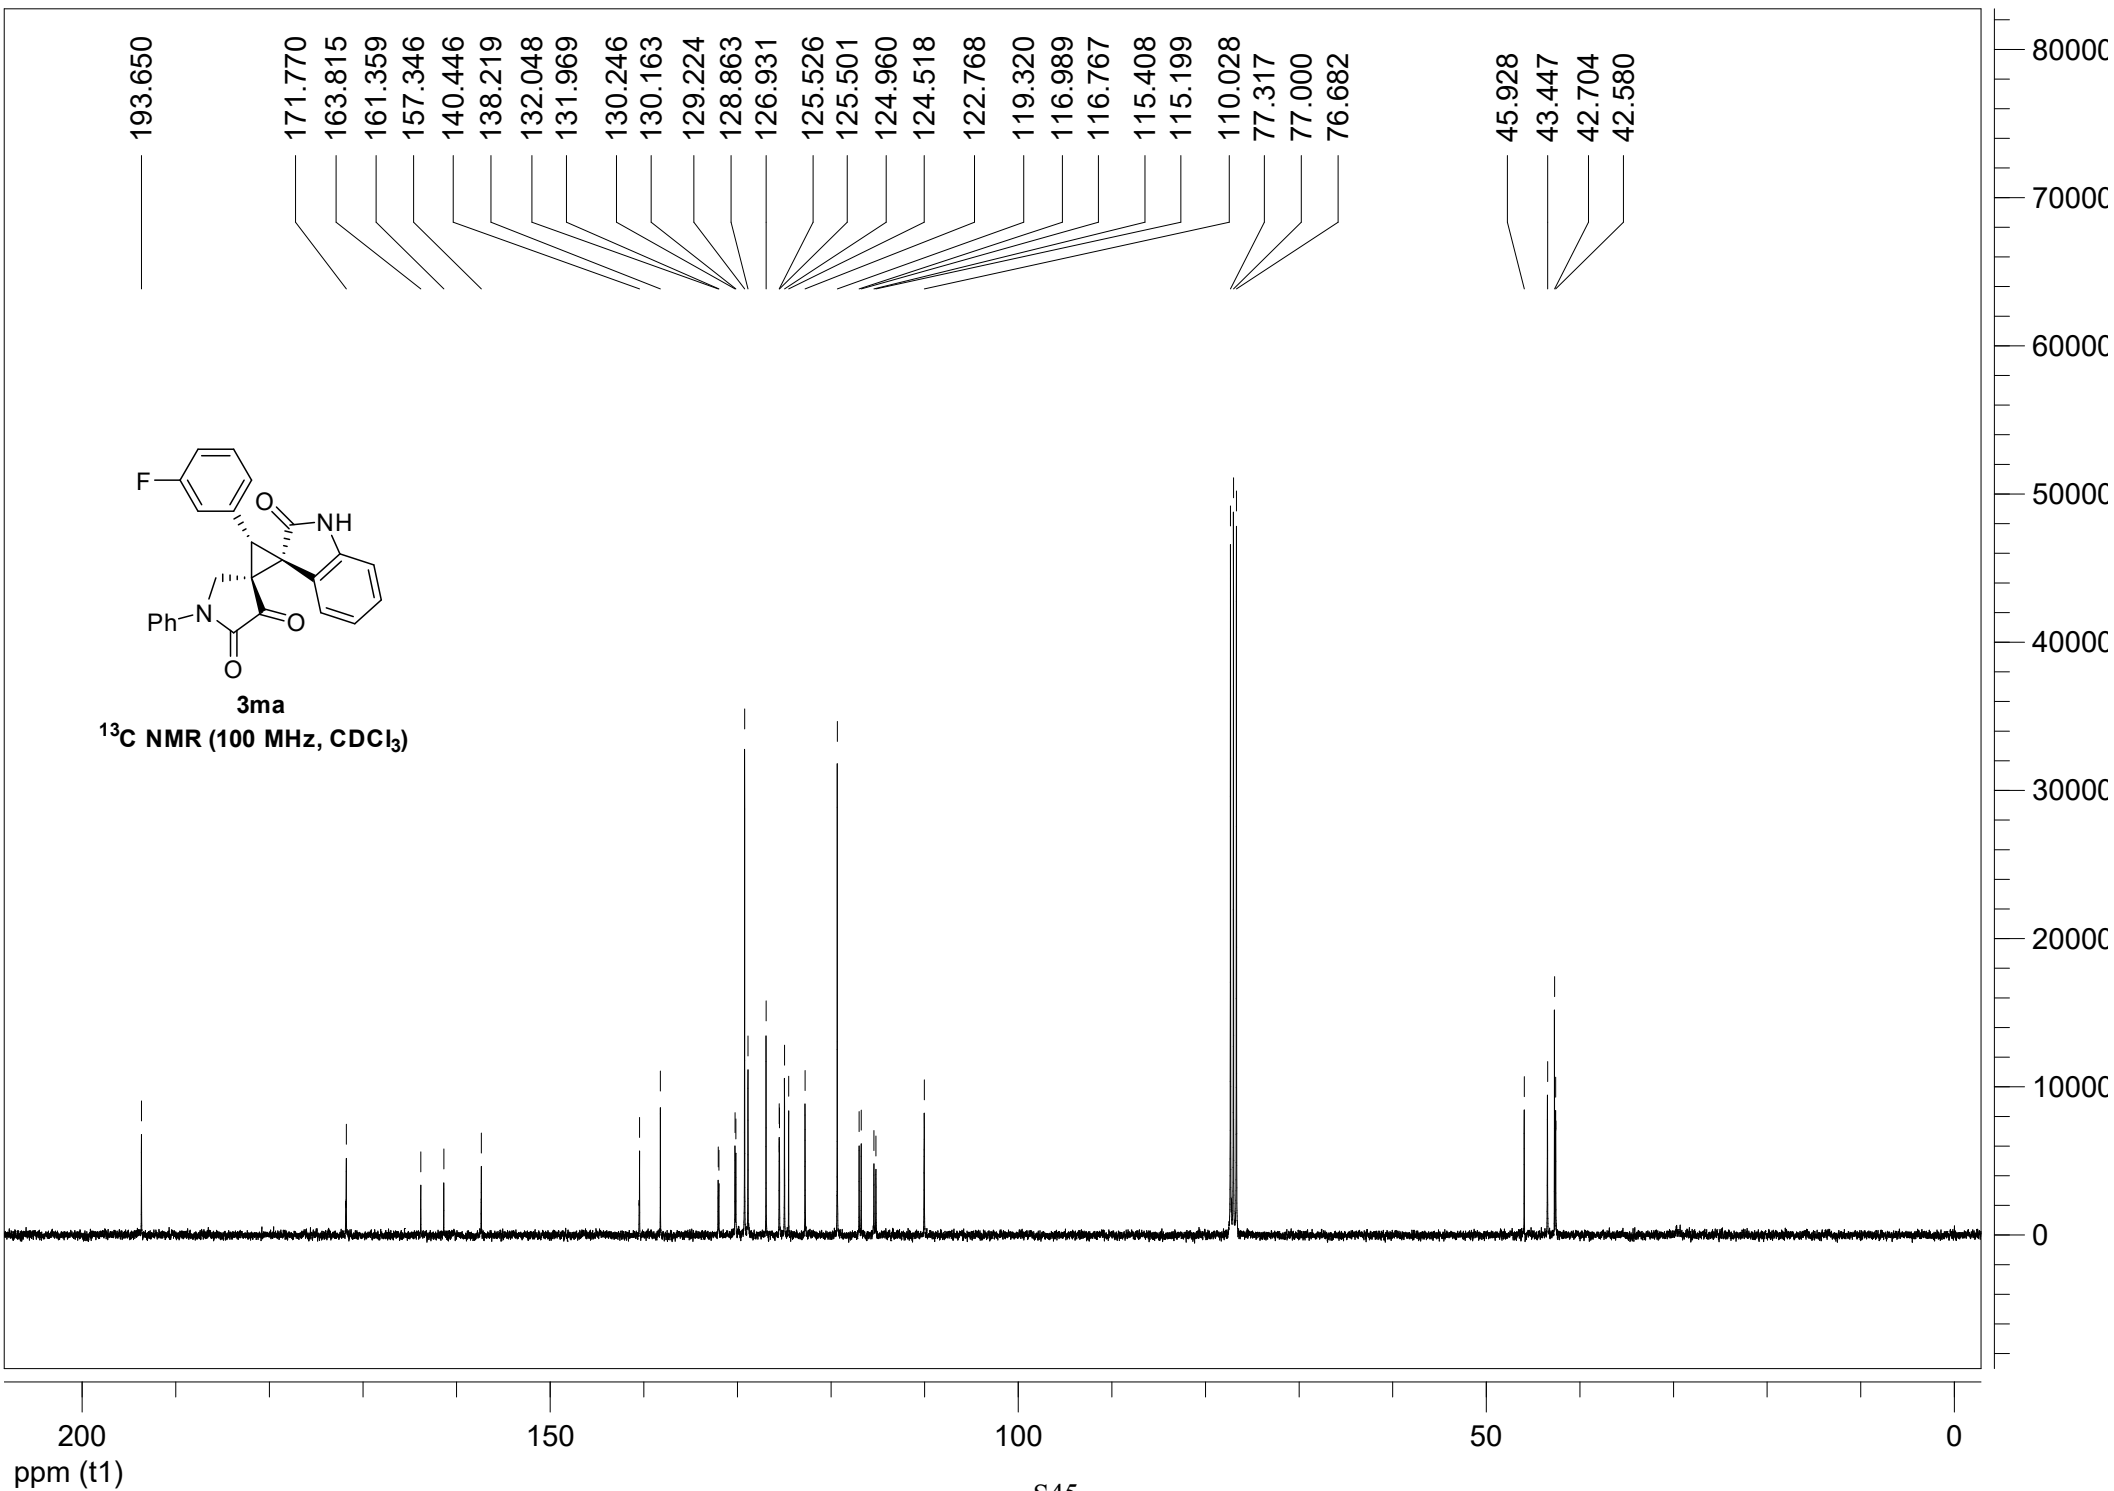

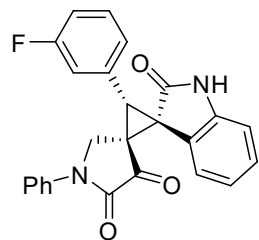

3ma

$^{19}\text{F}$  NMR (376 MHz,  $\text{CDCl}_3$ )

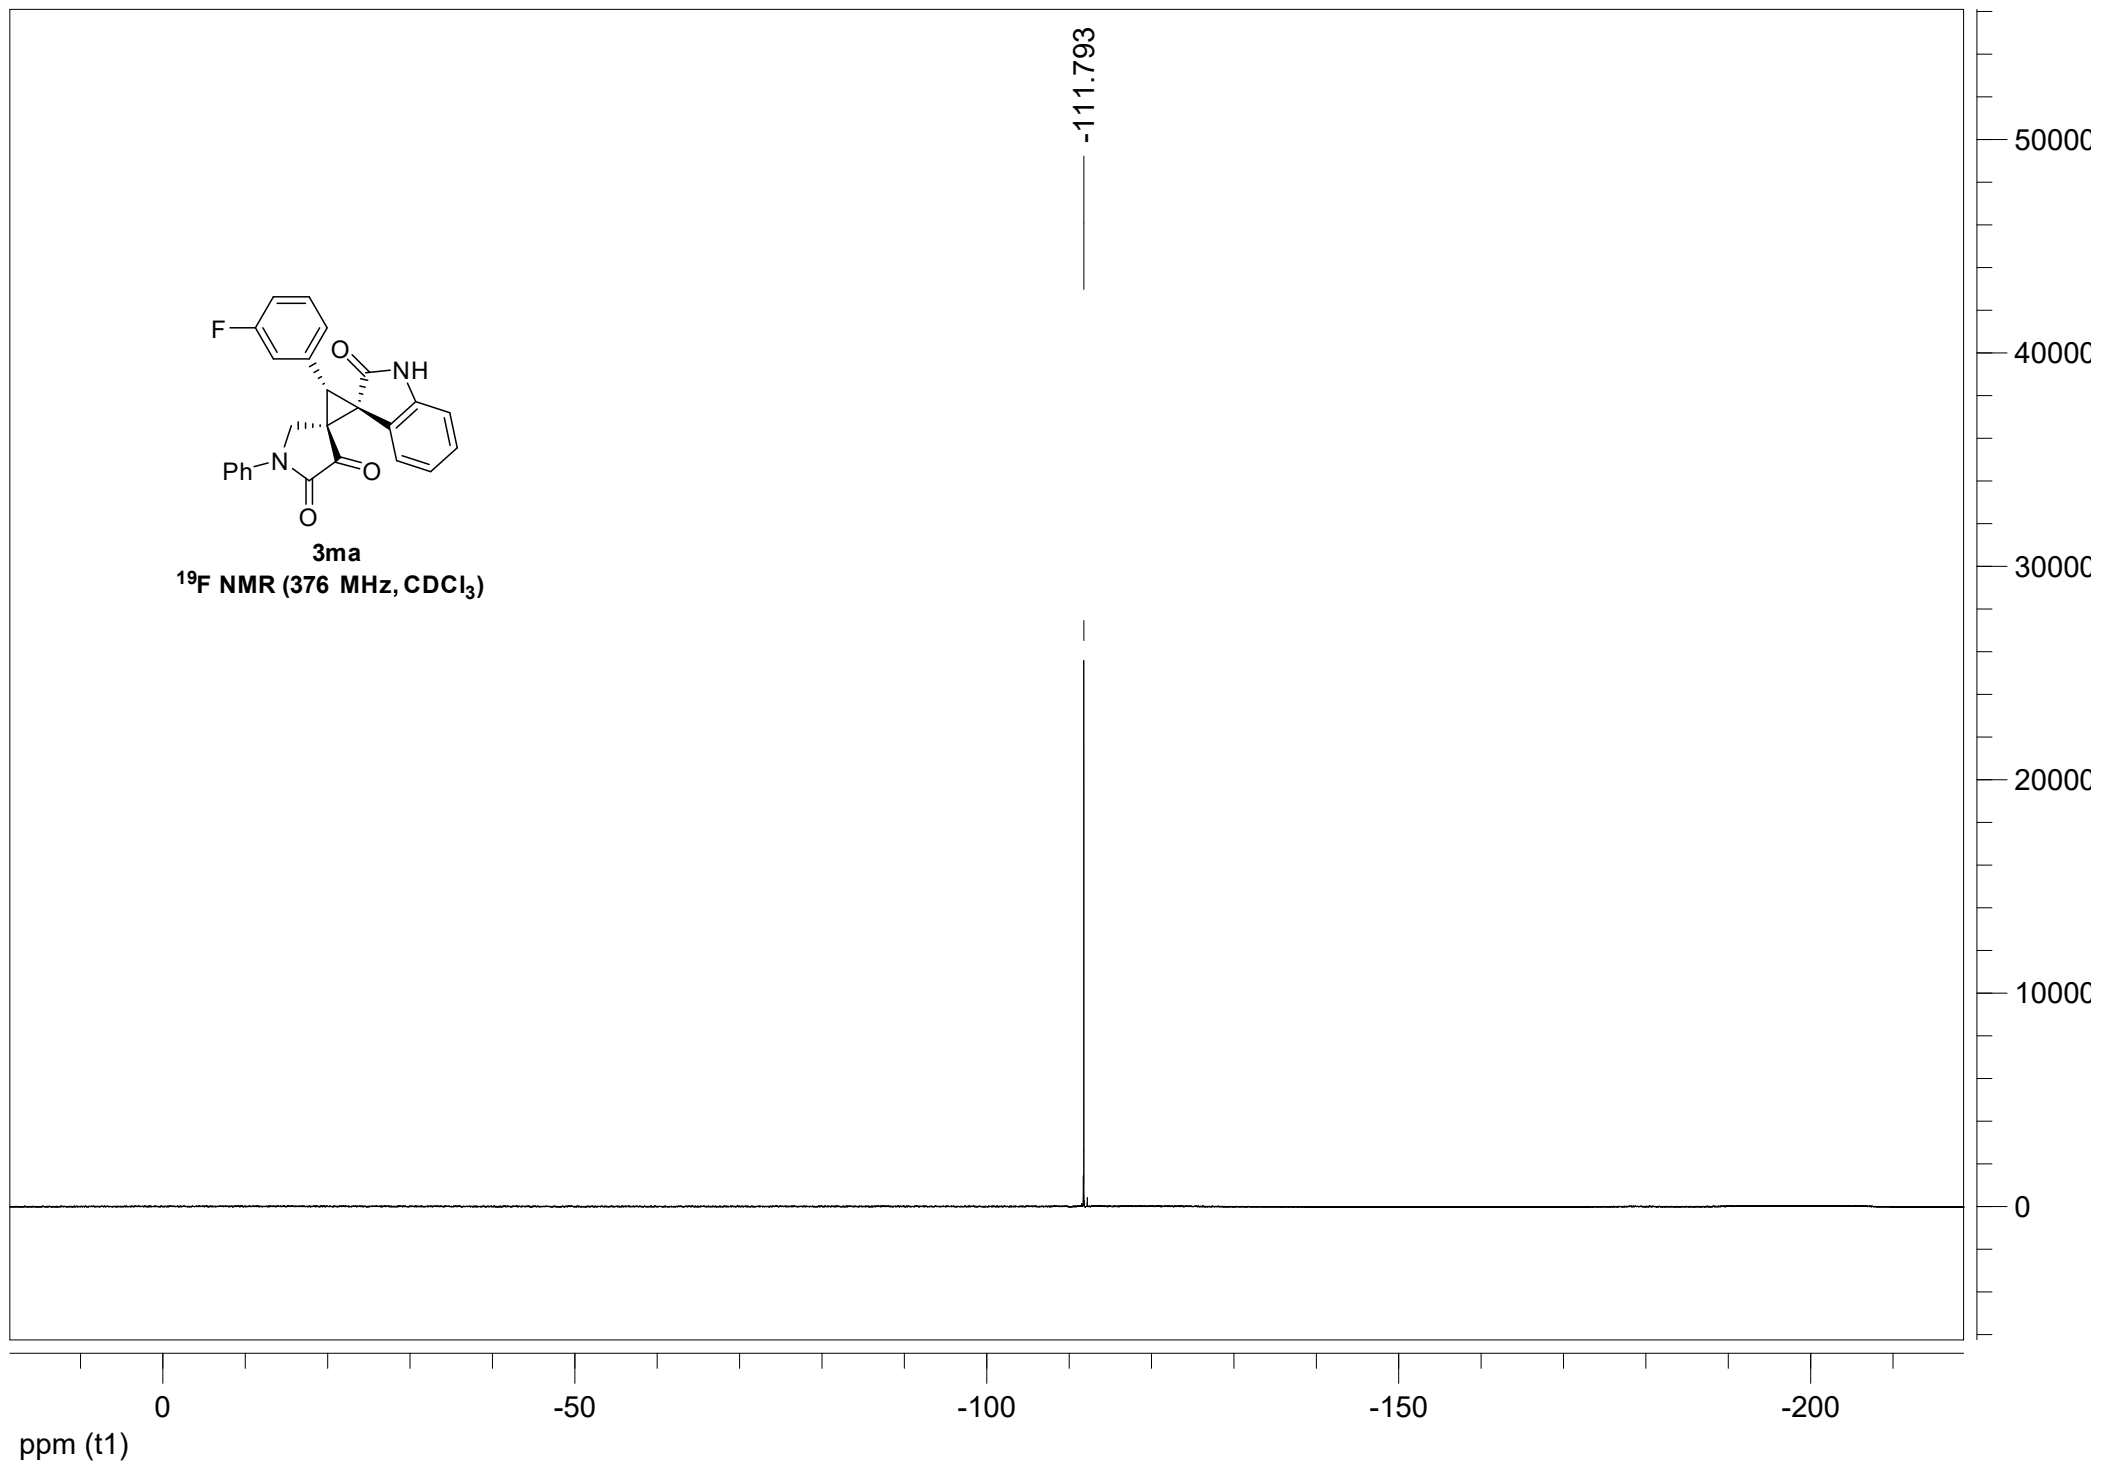

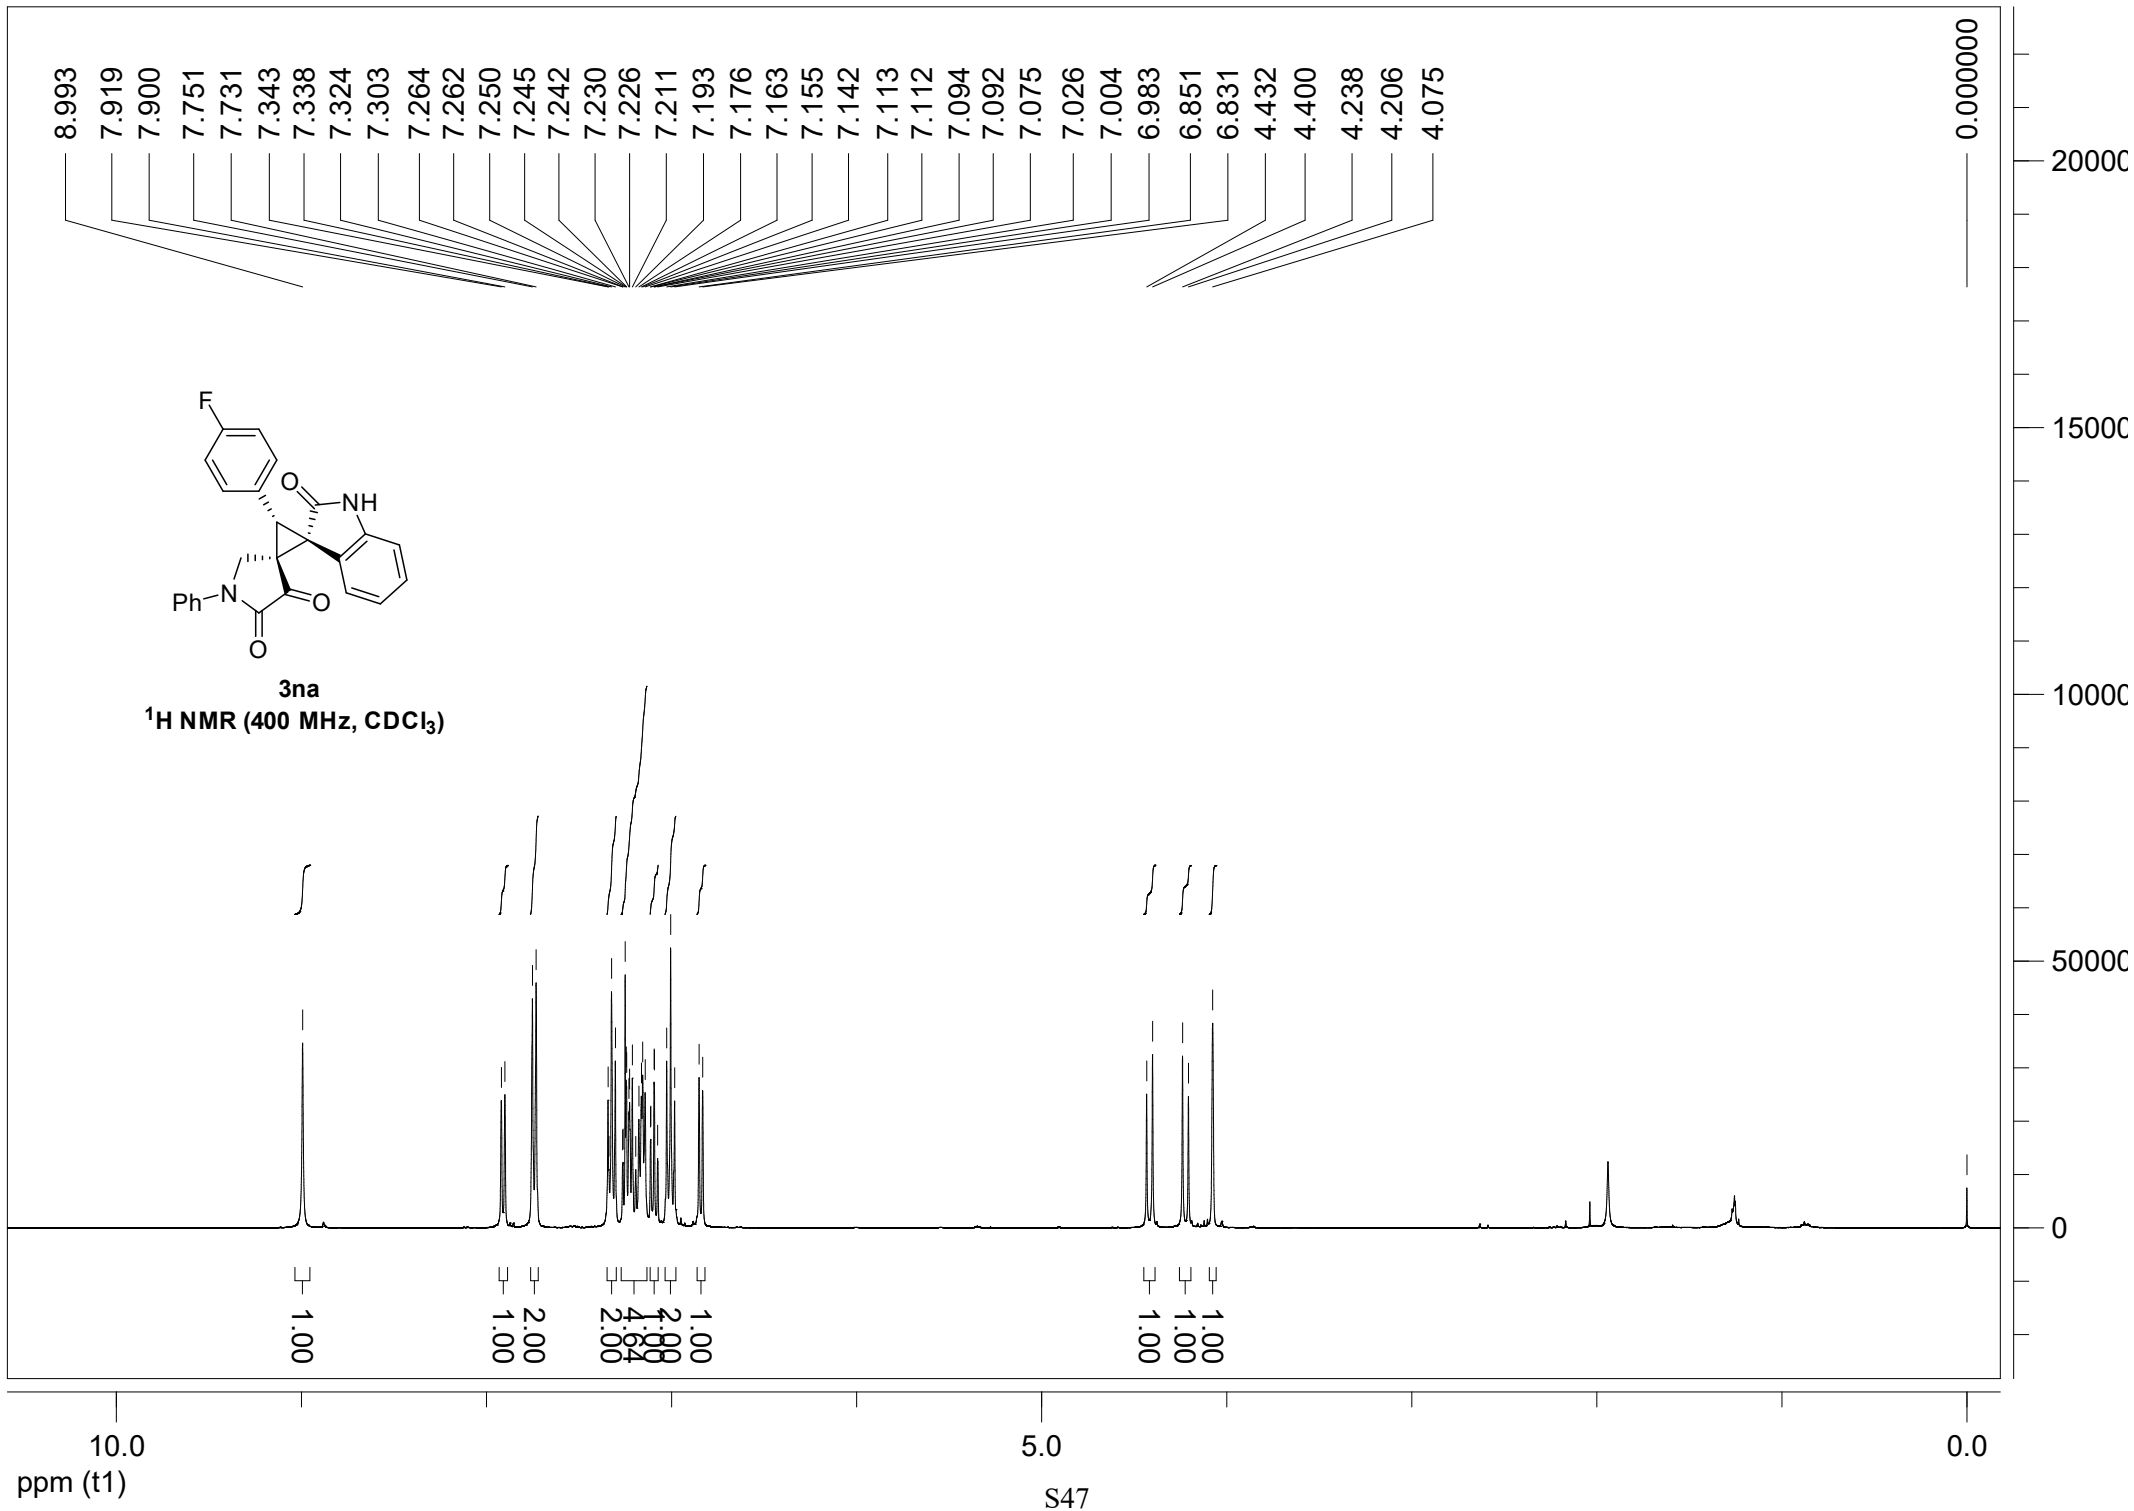



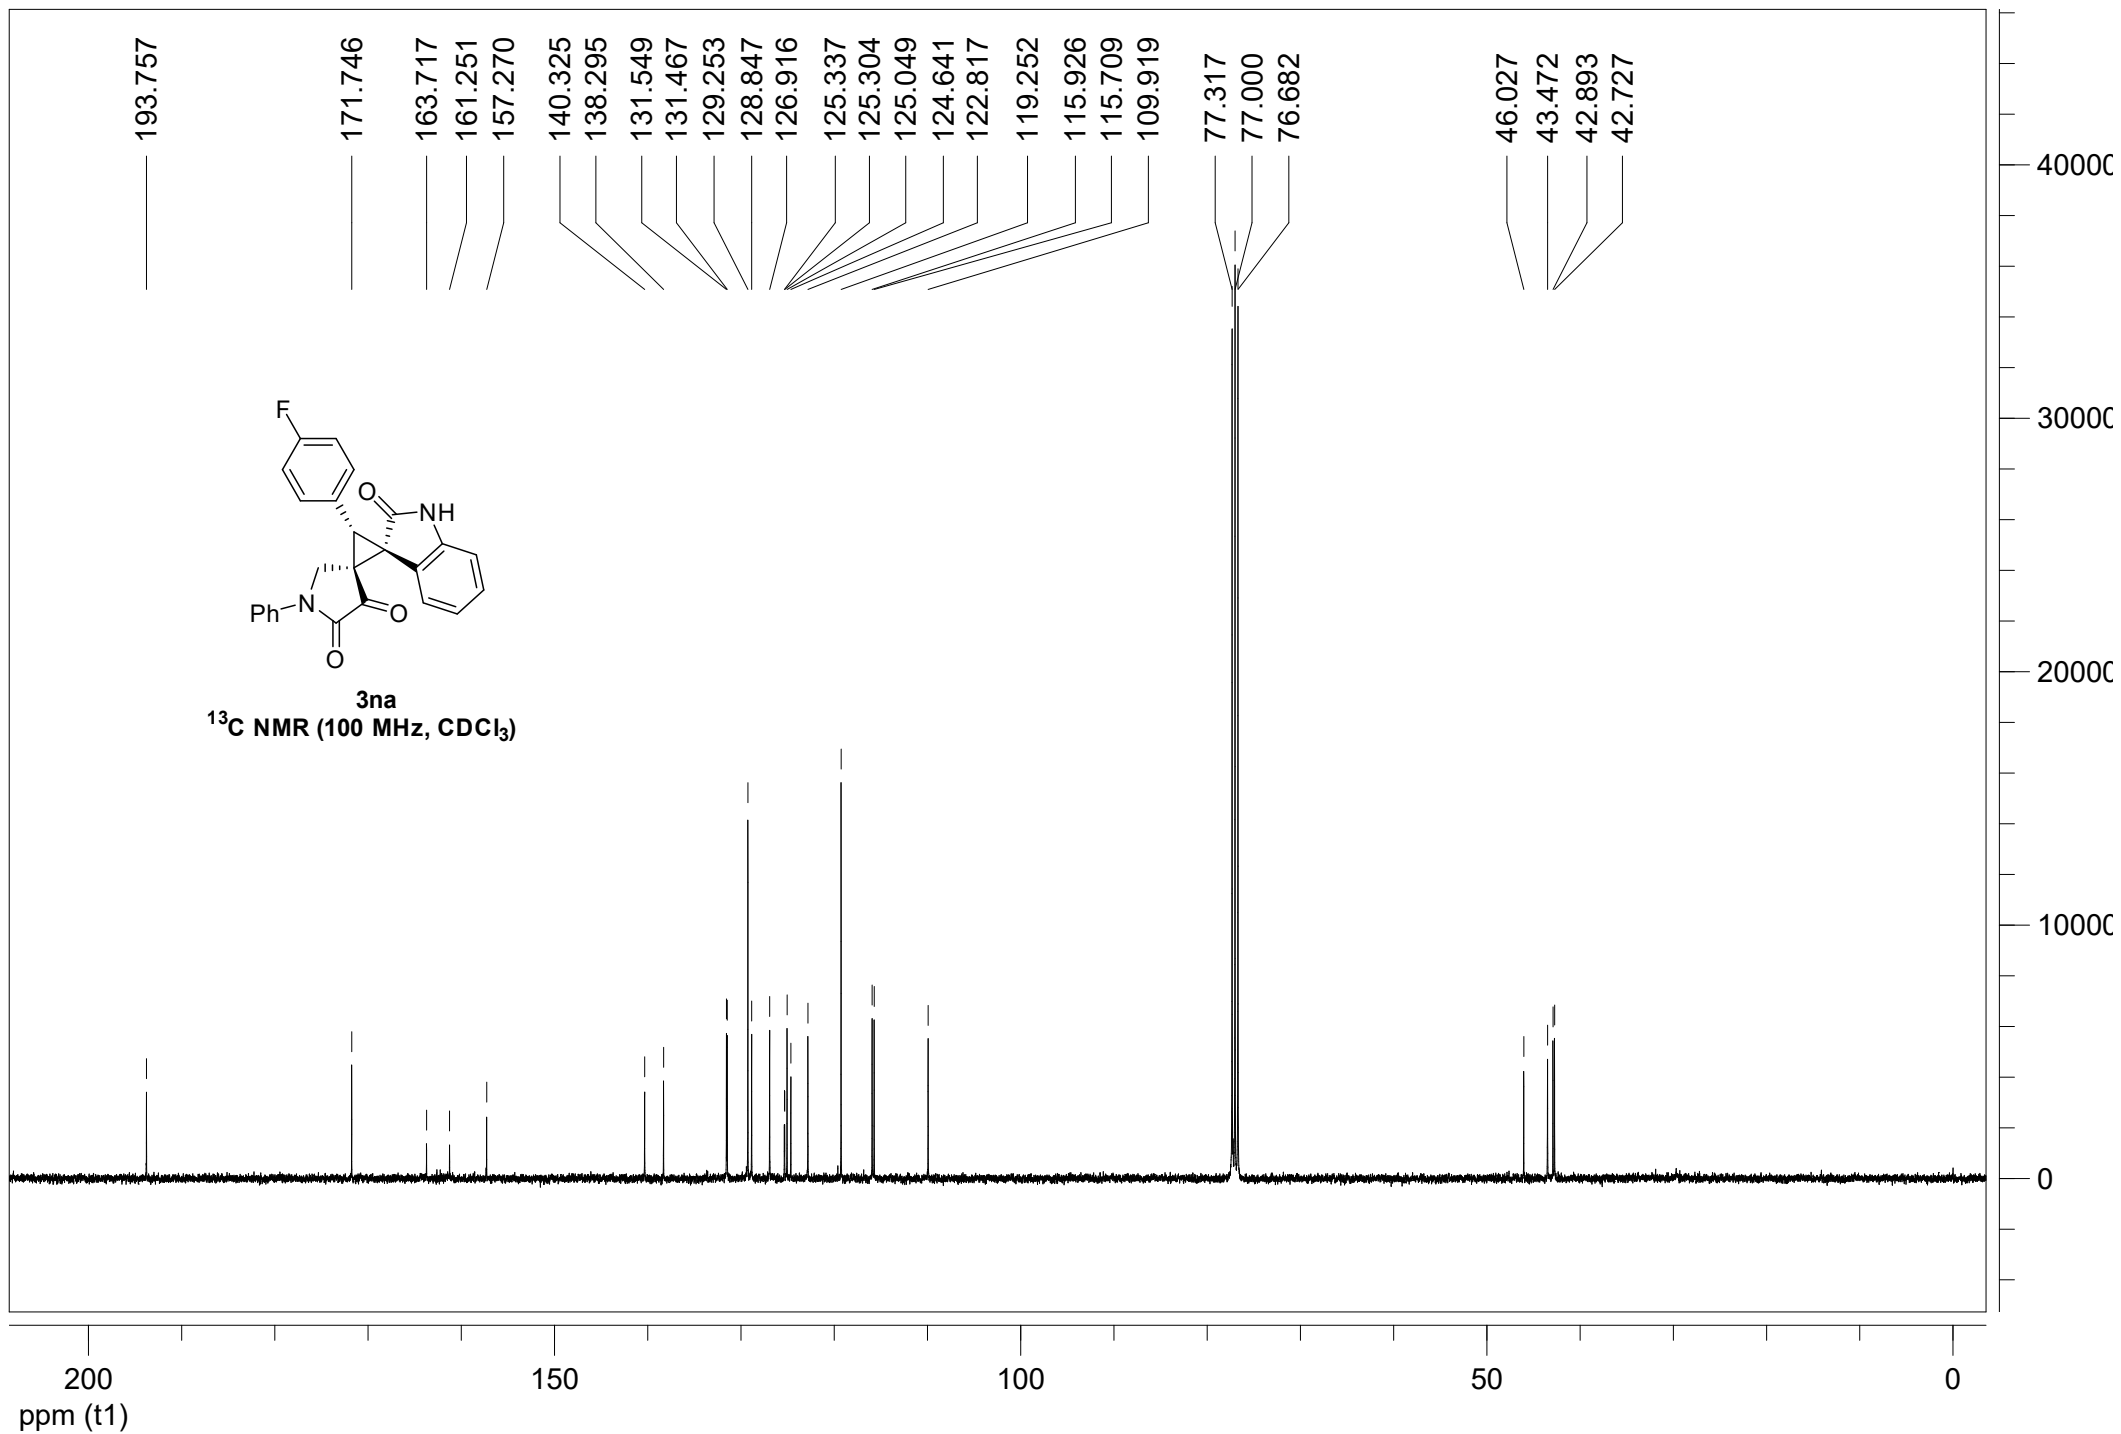

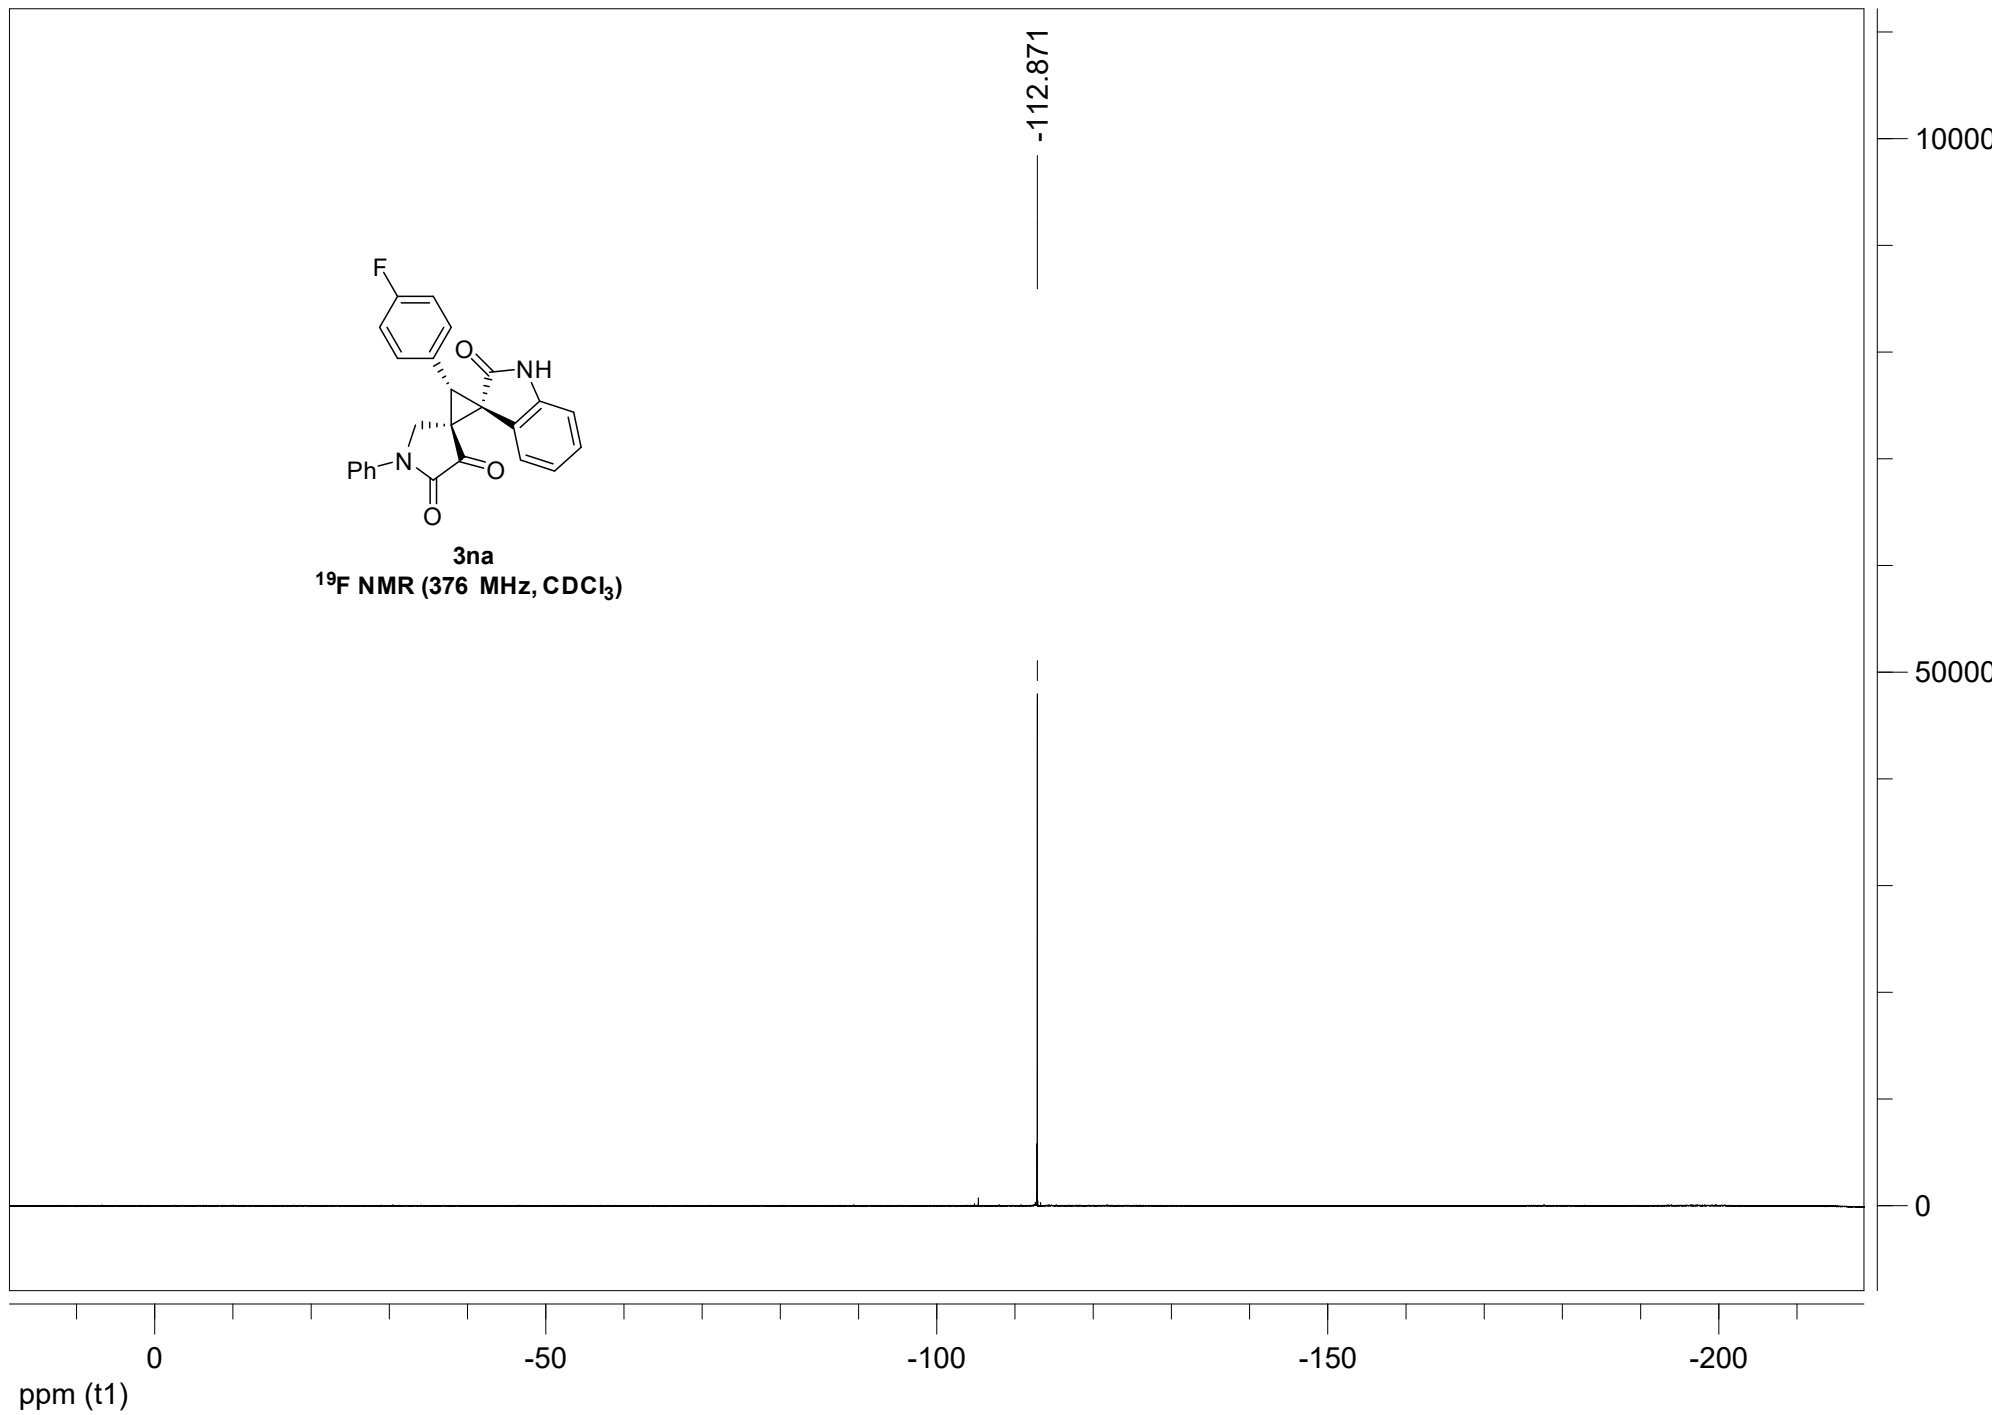



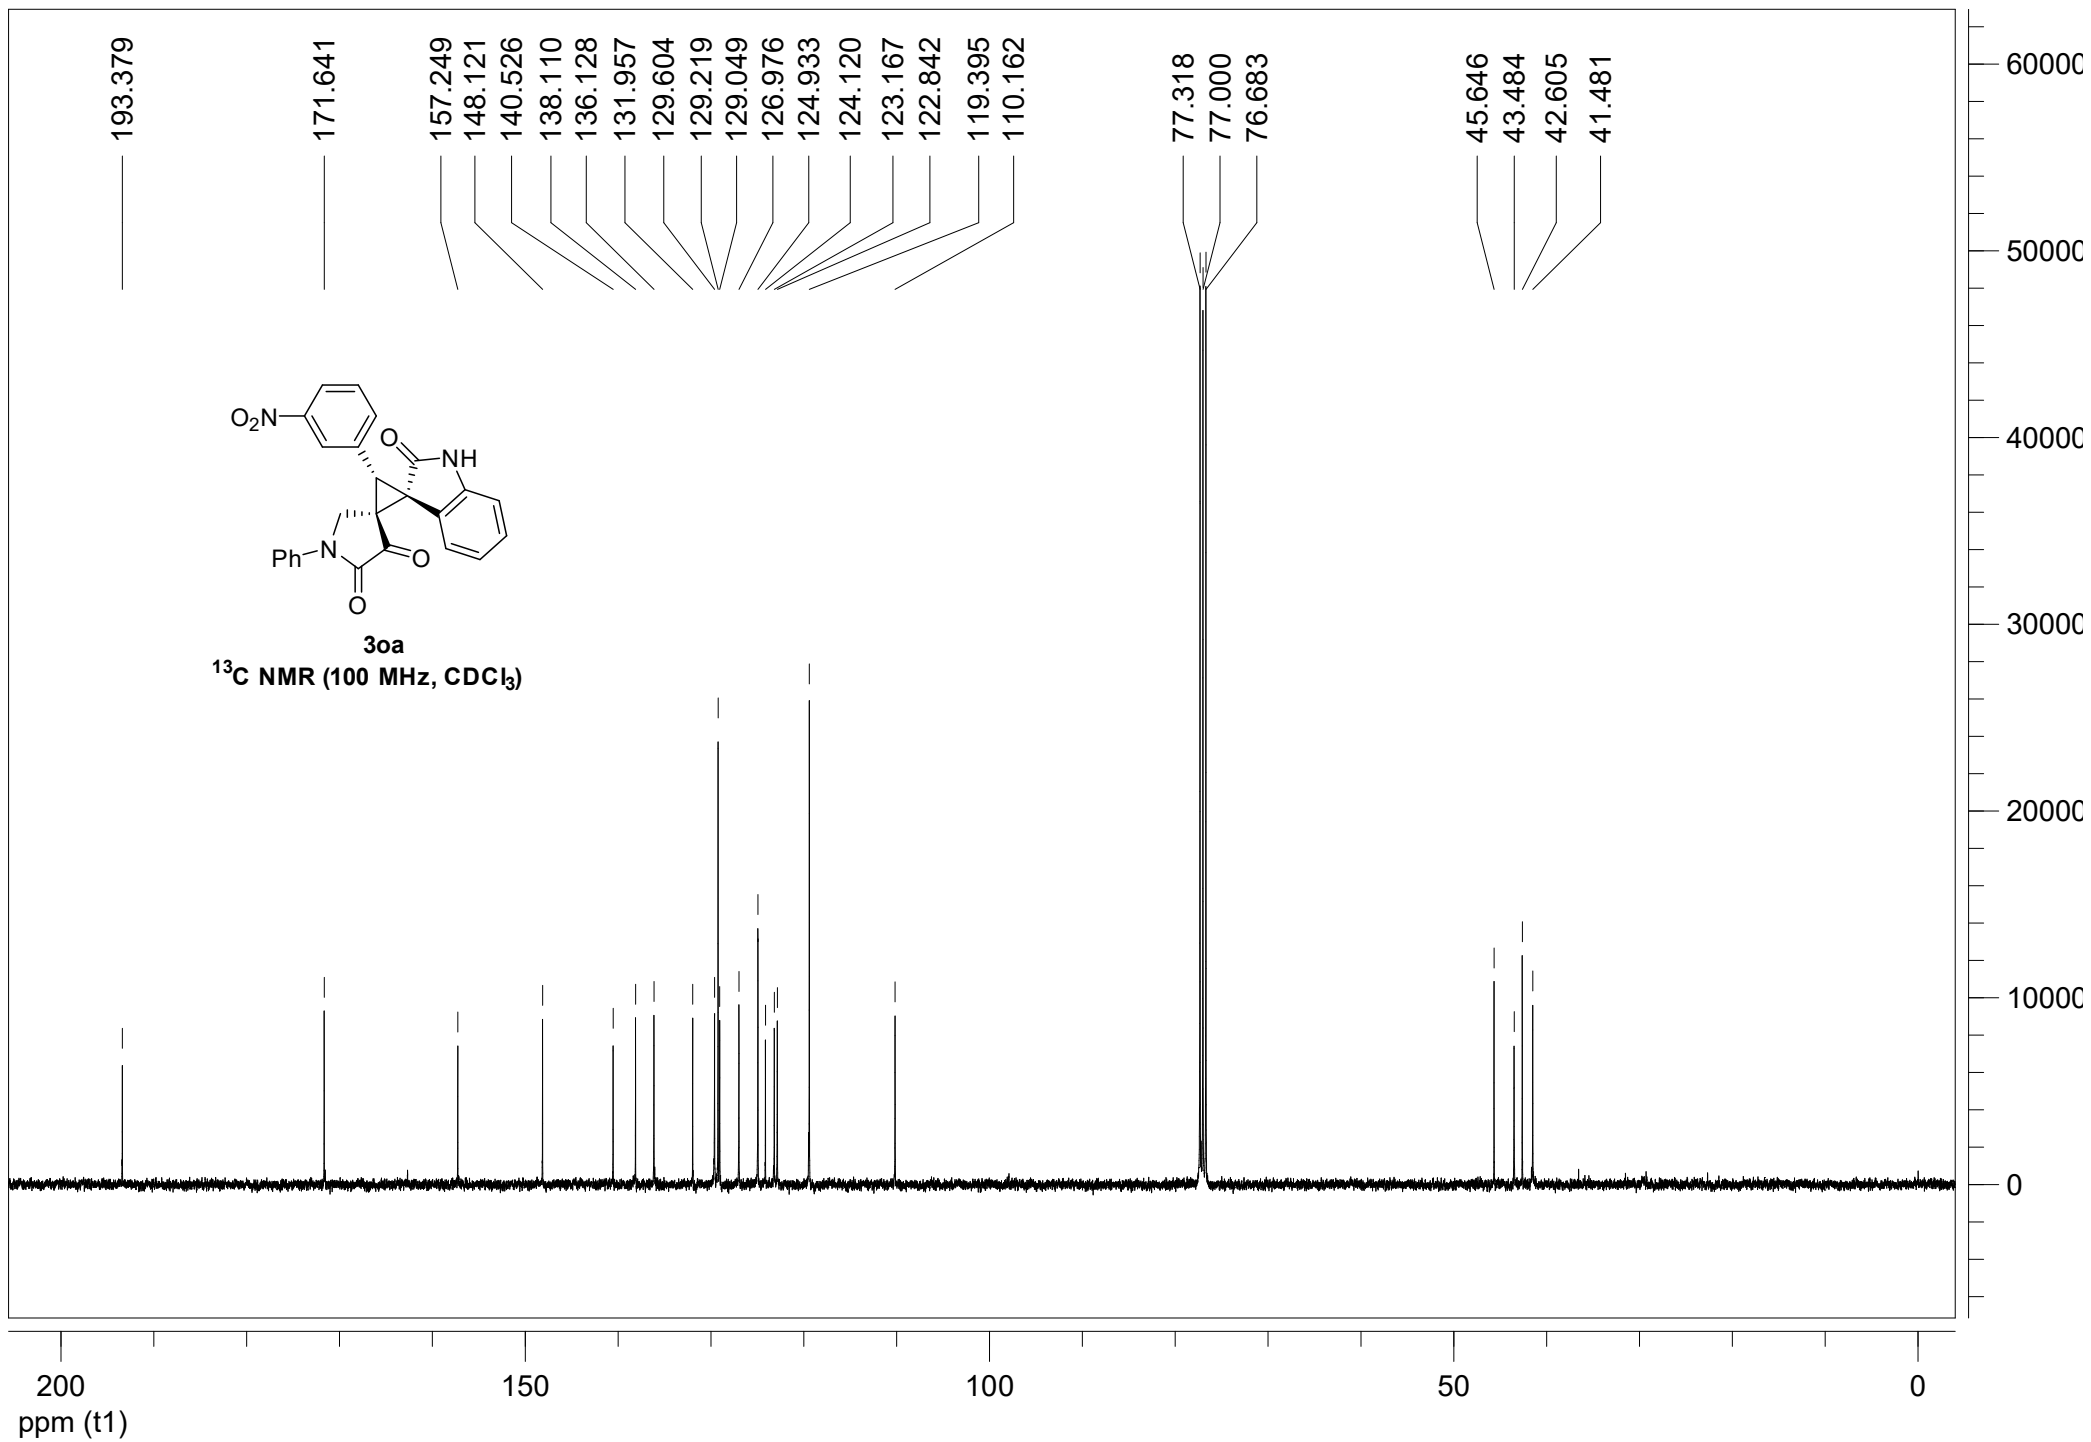

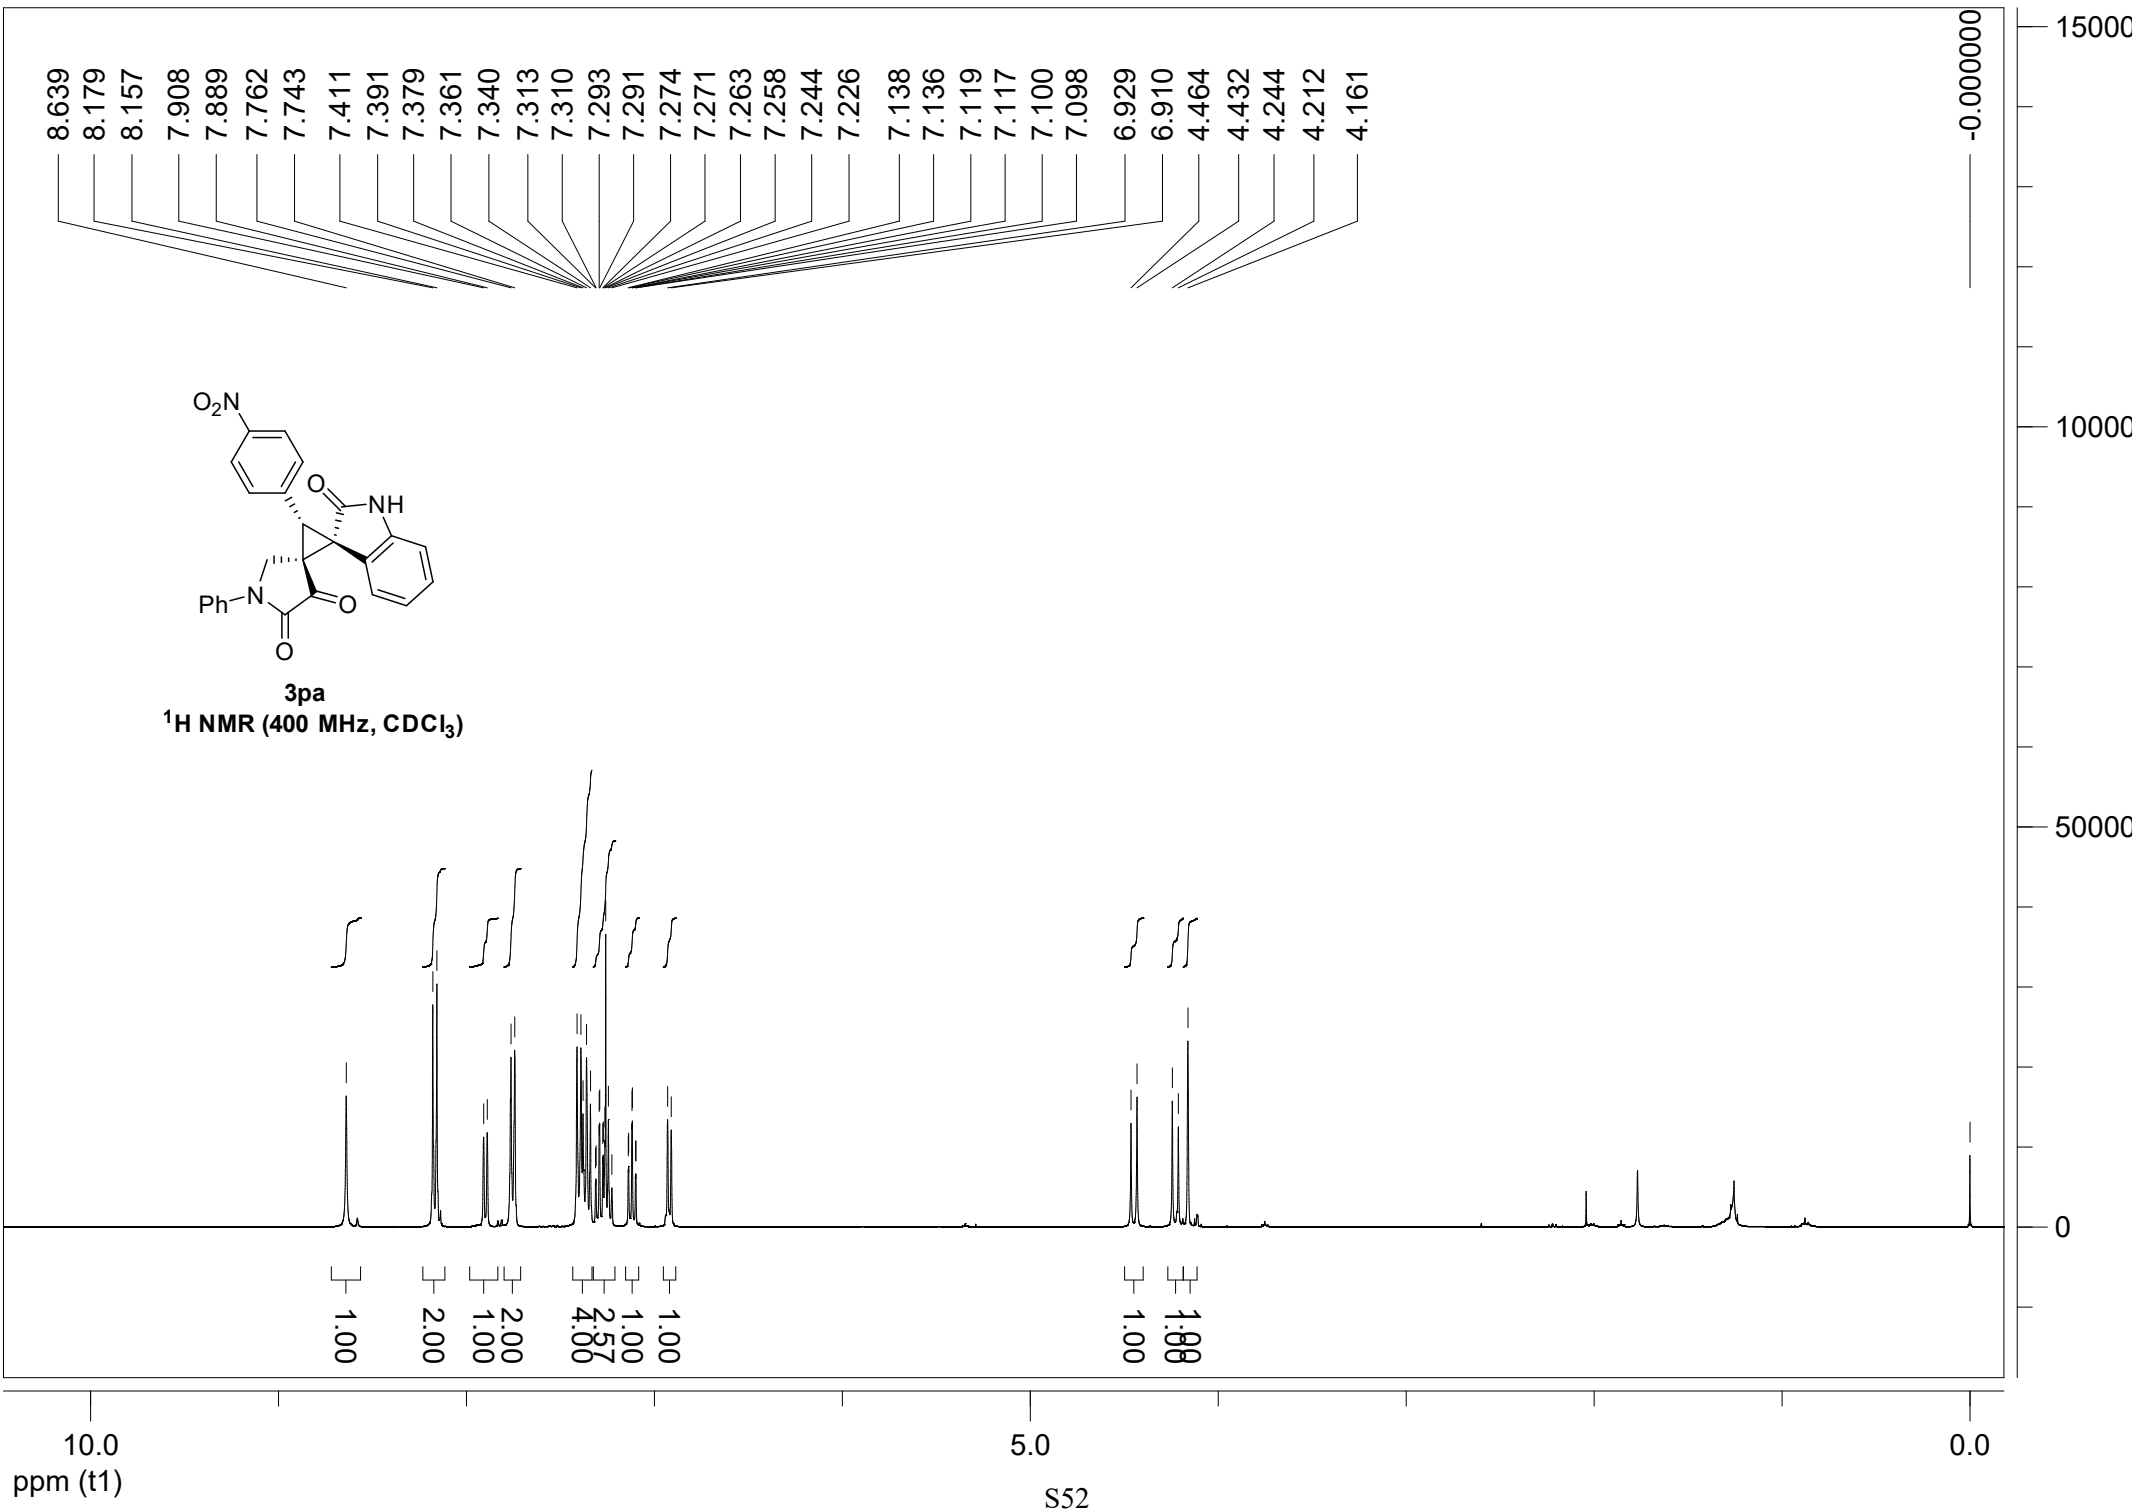

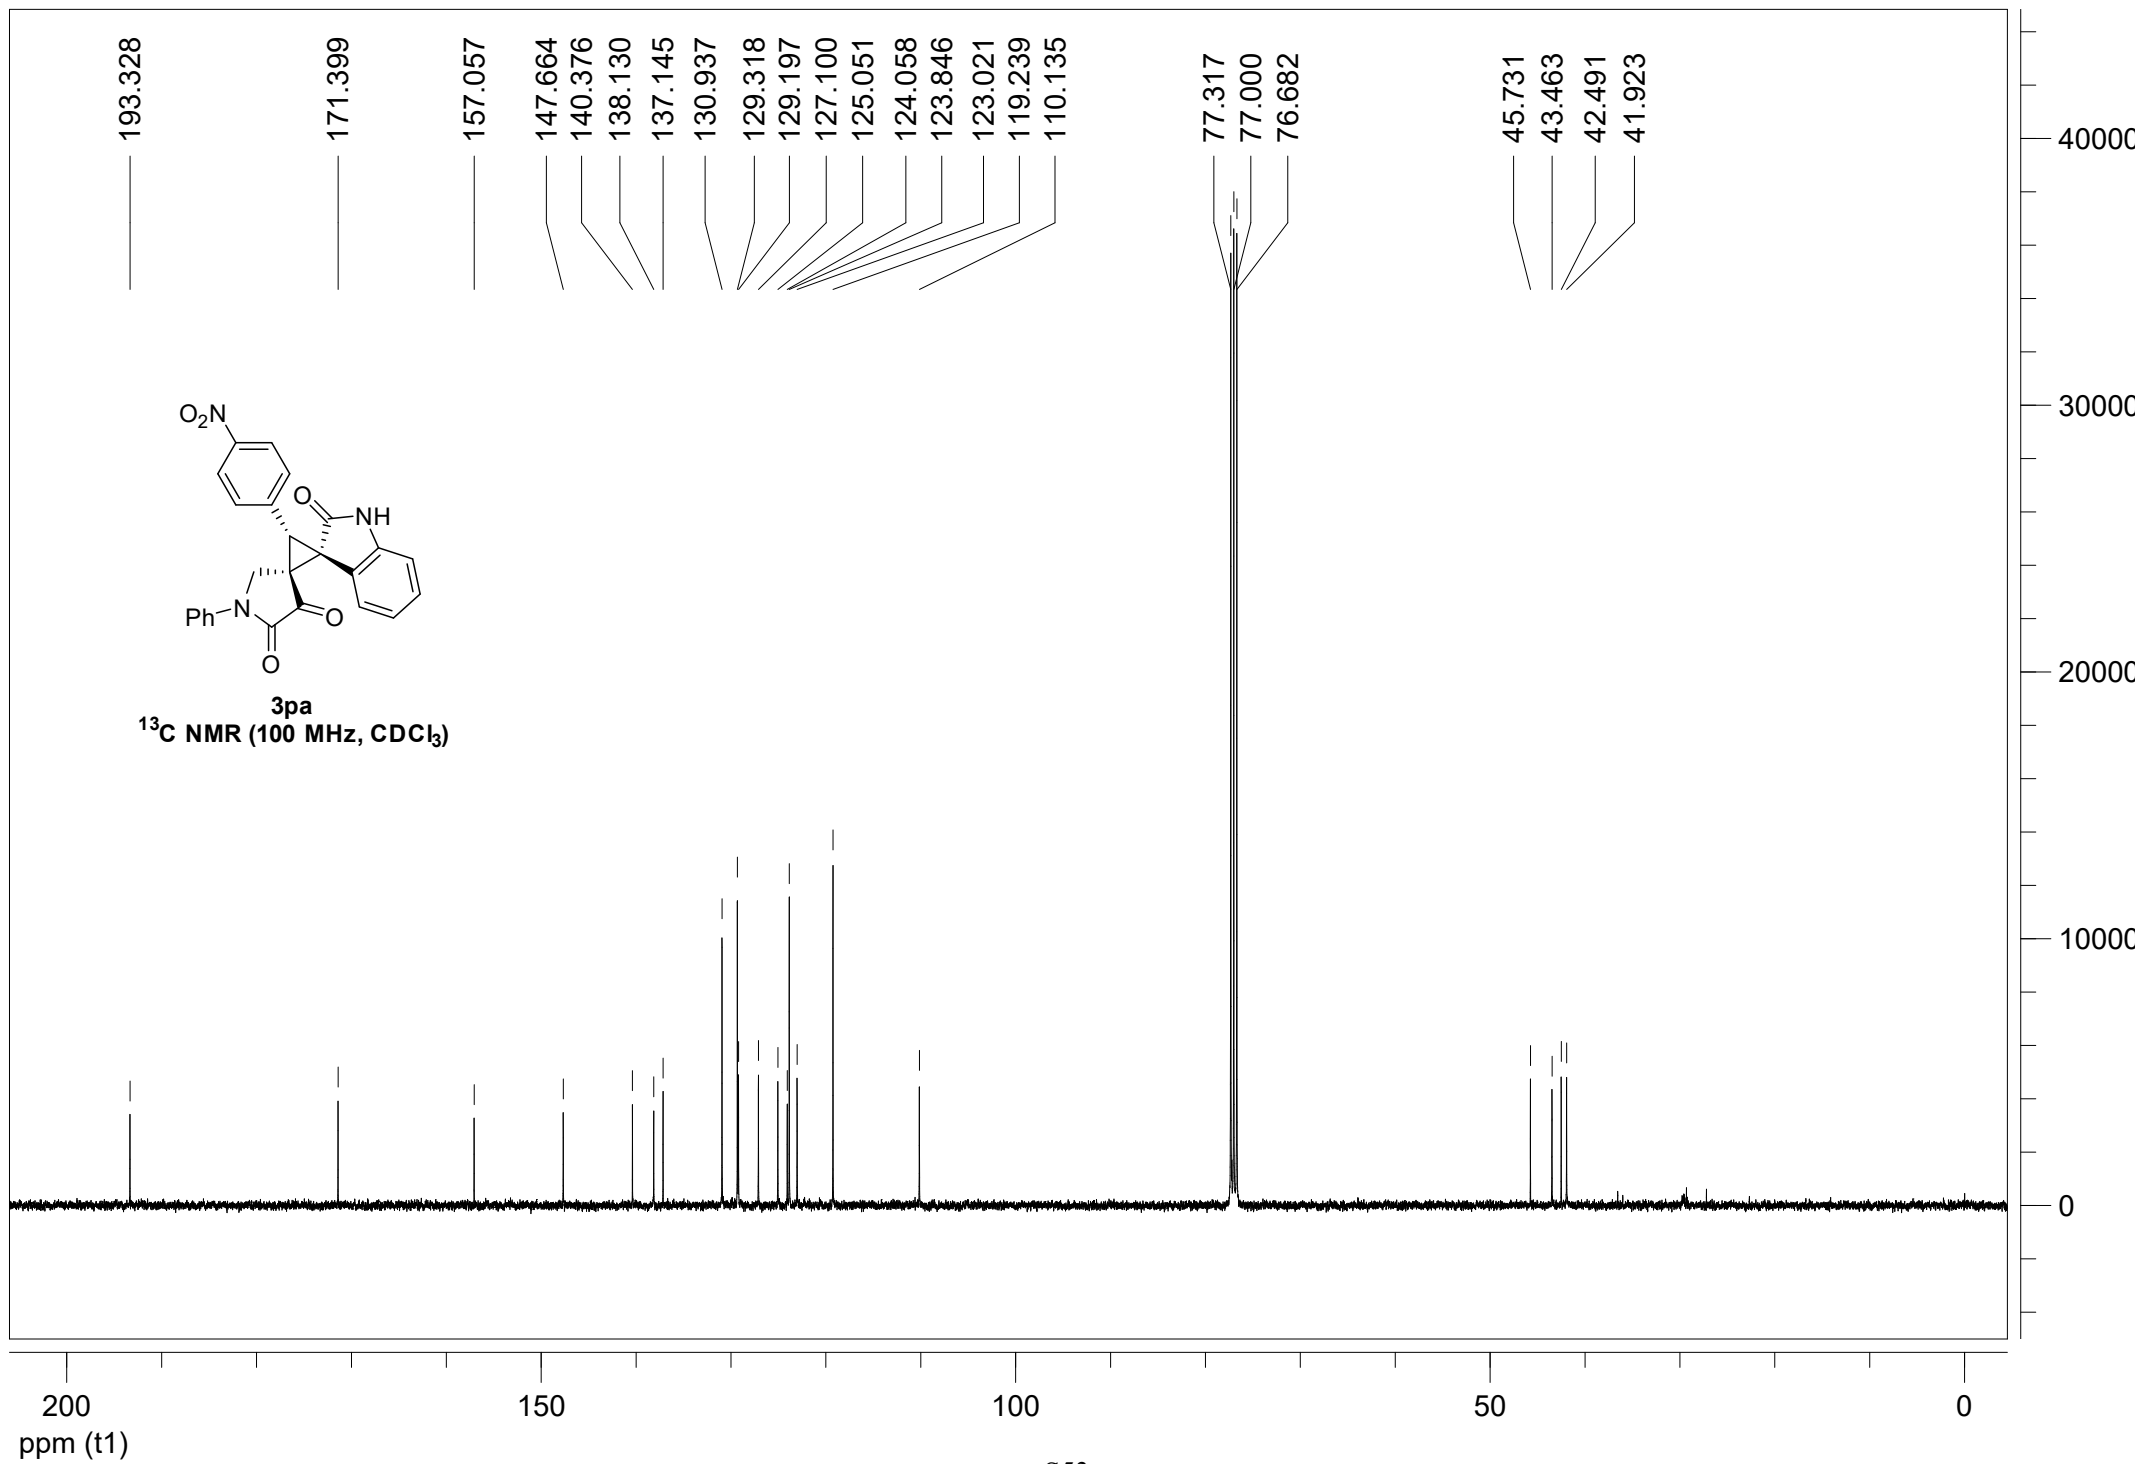

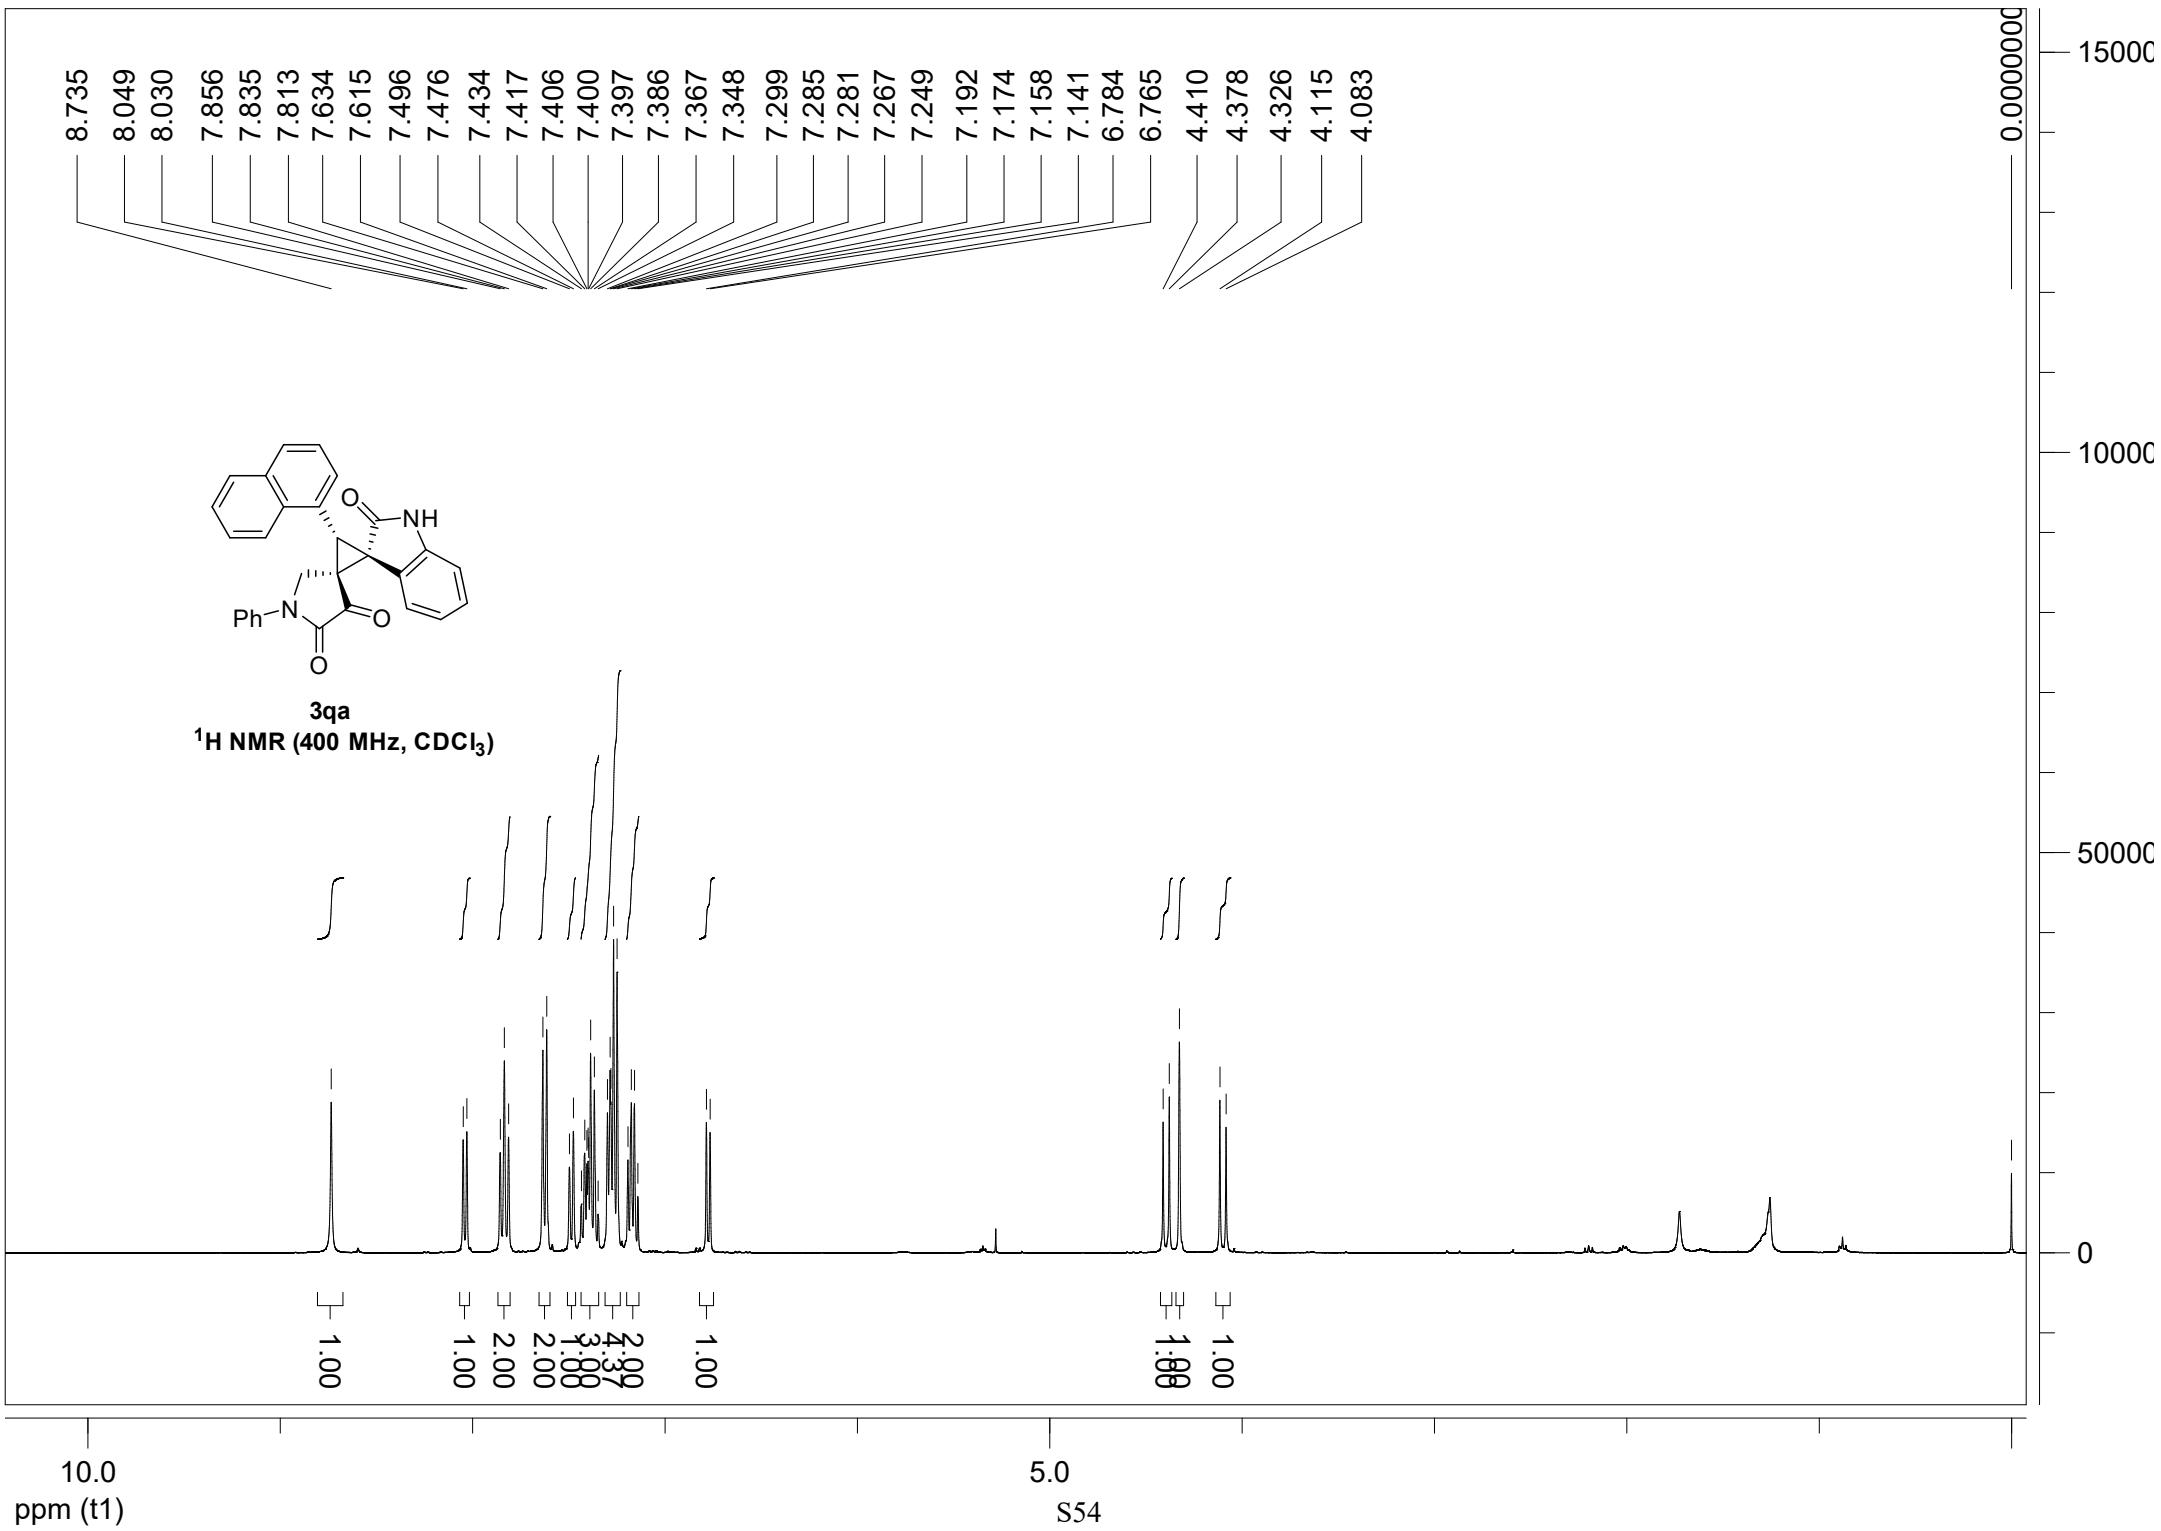

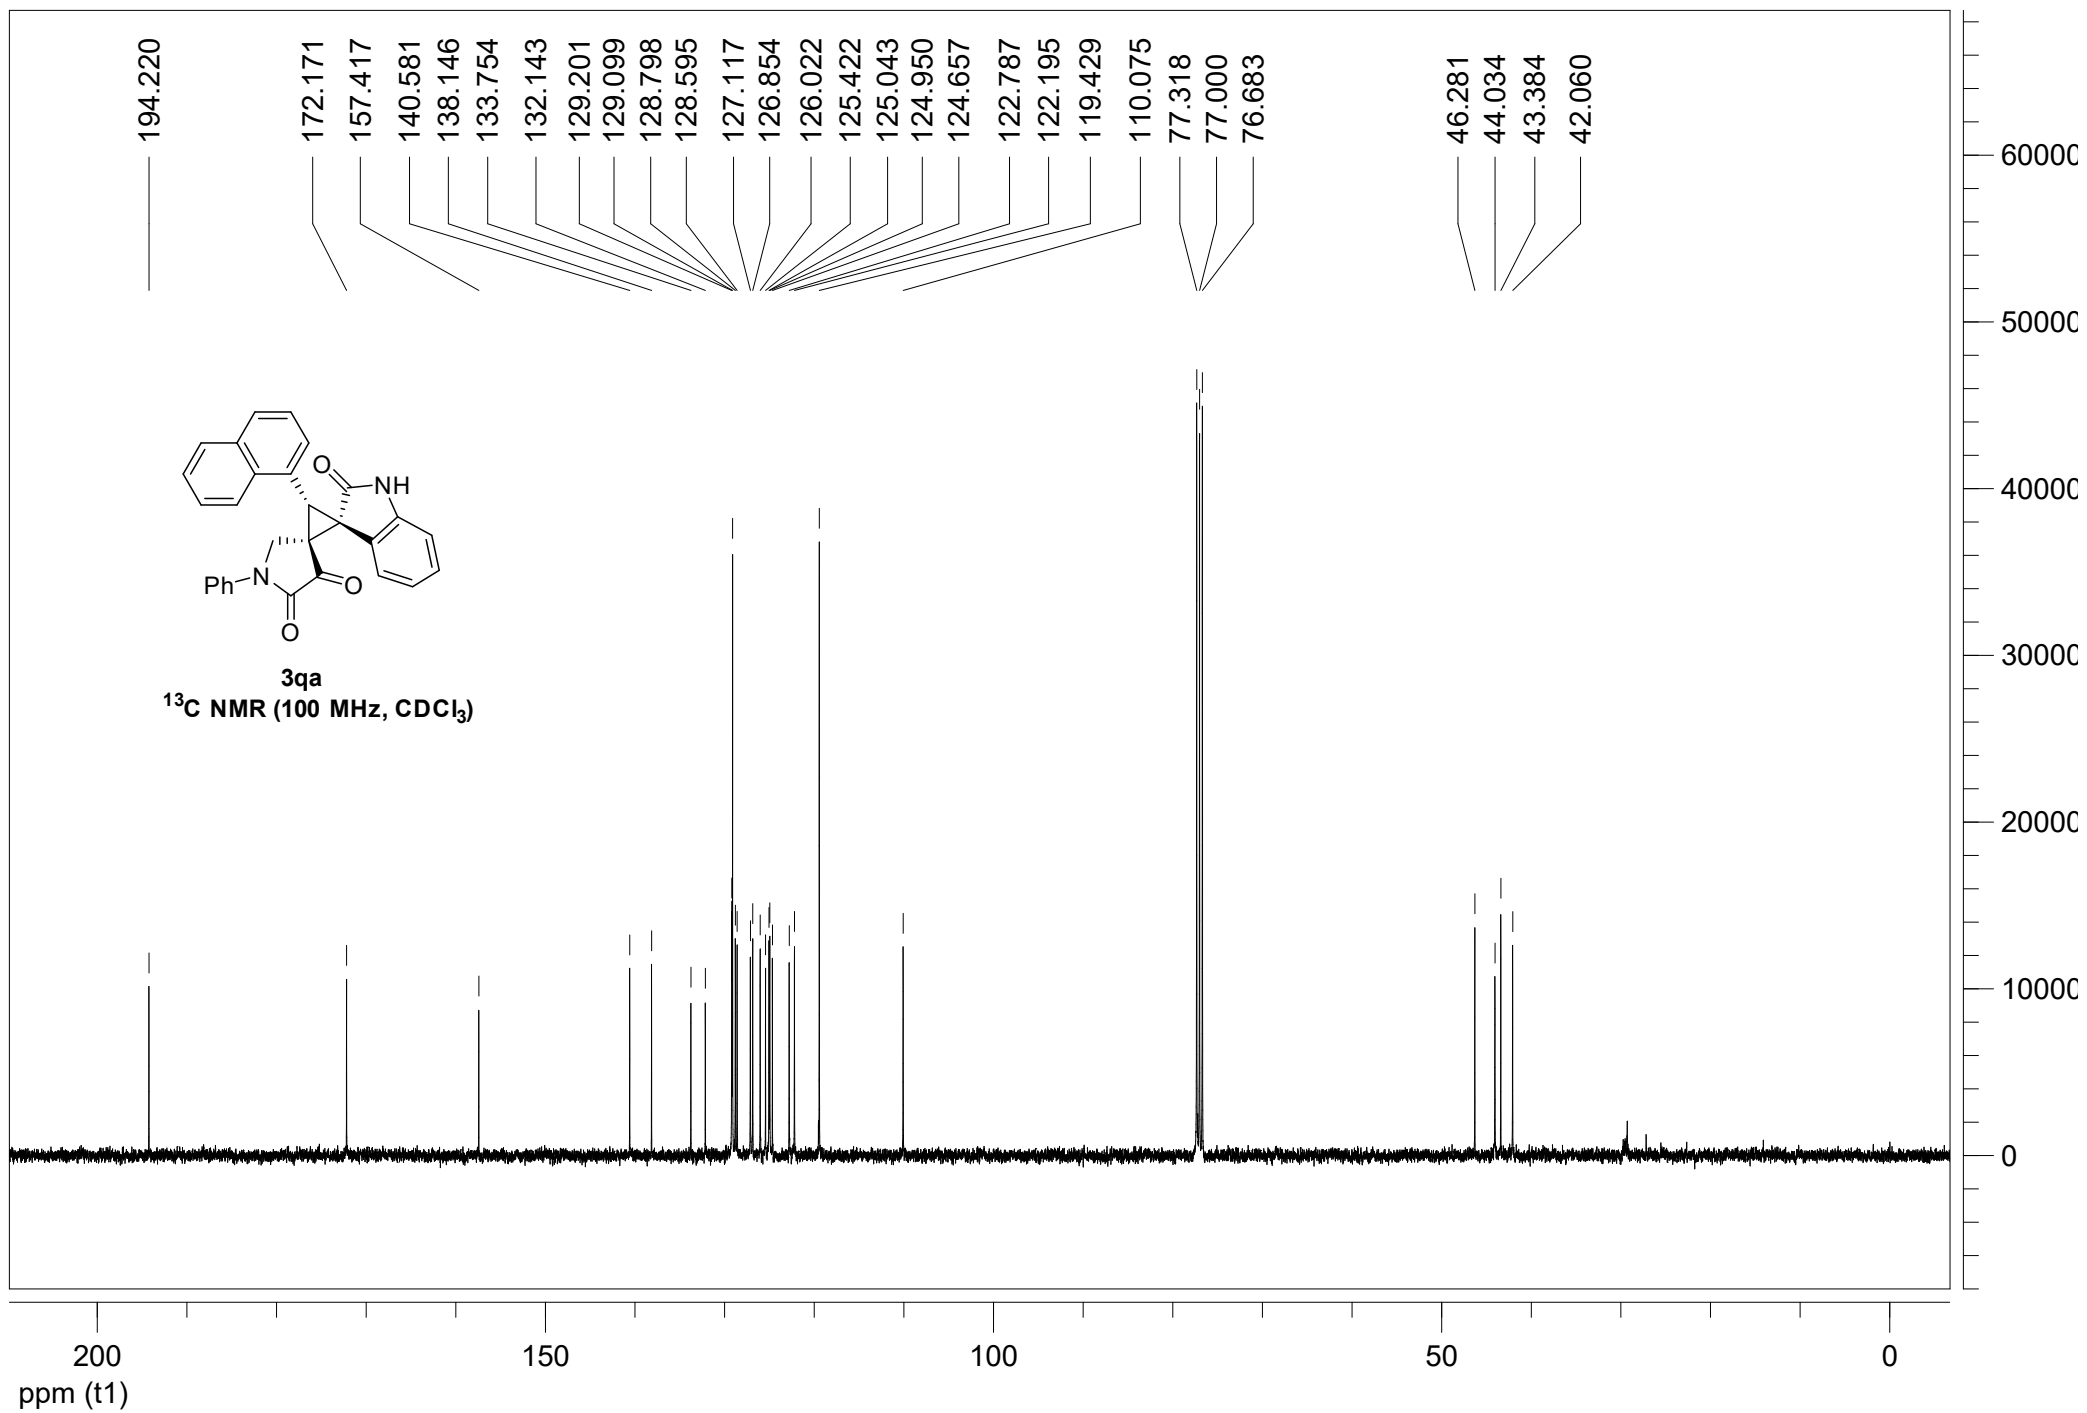



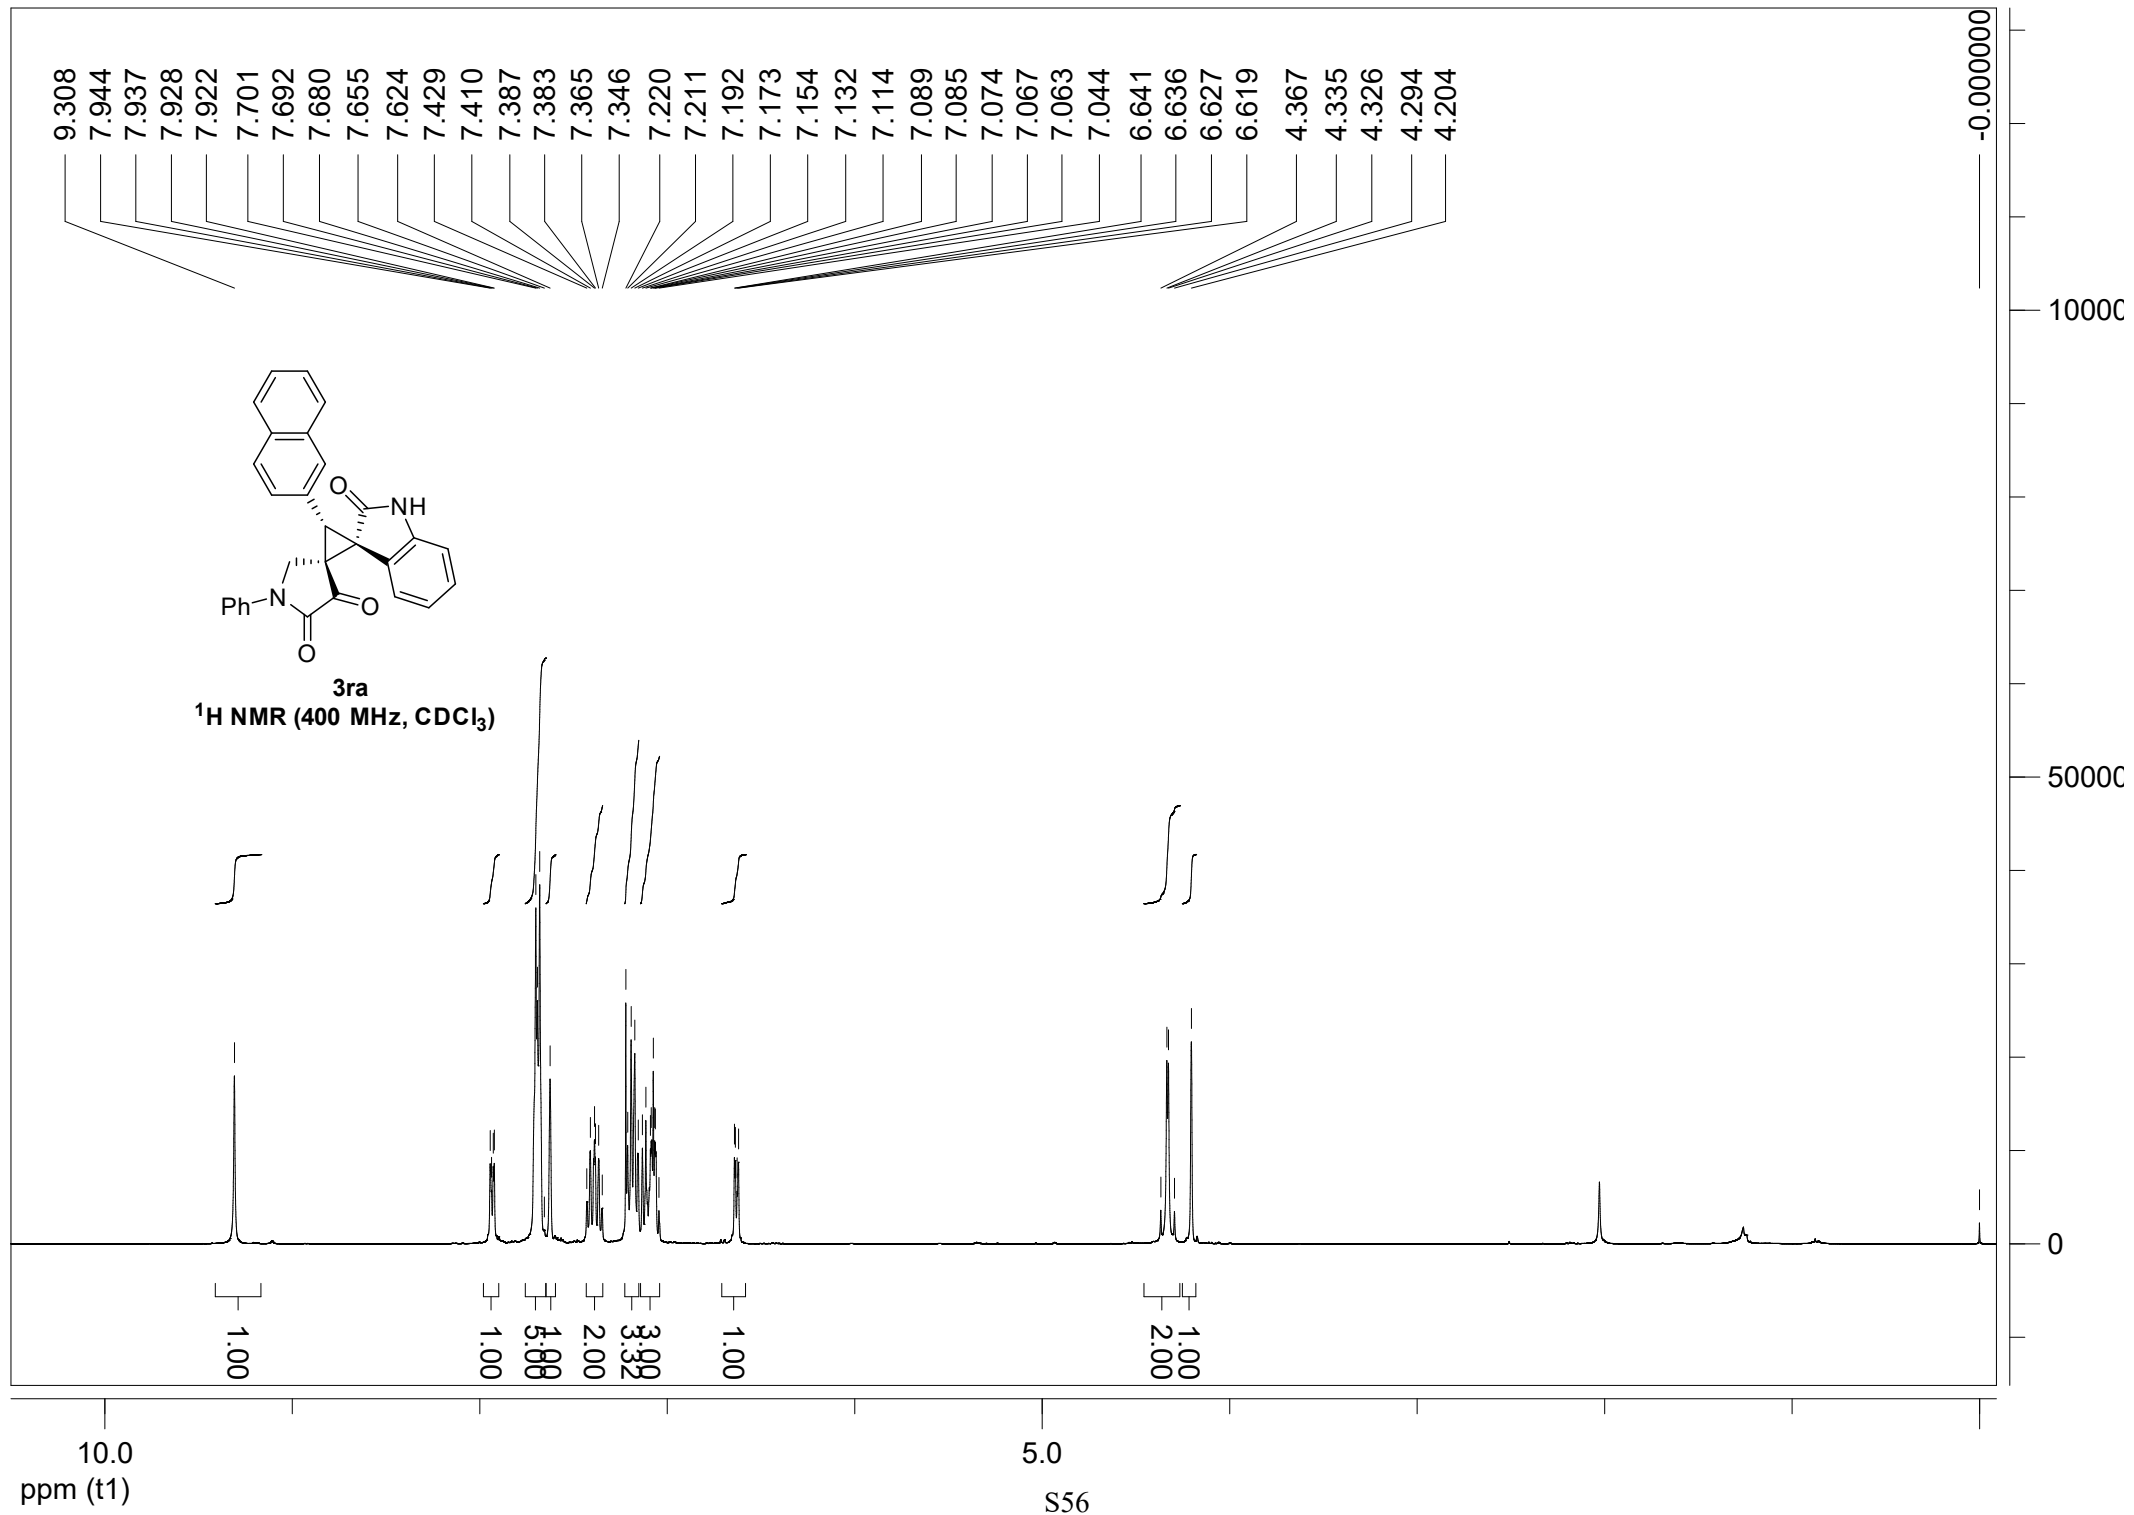

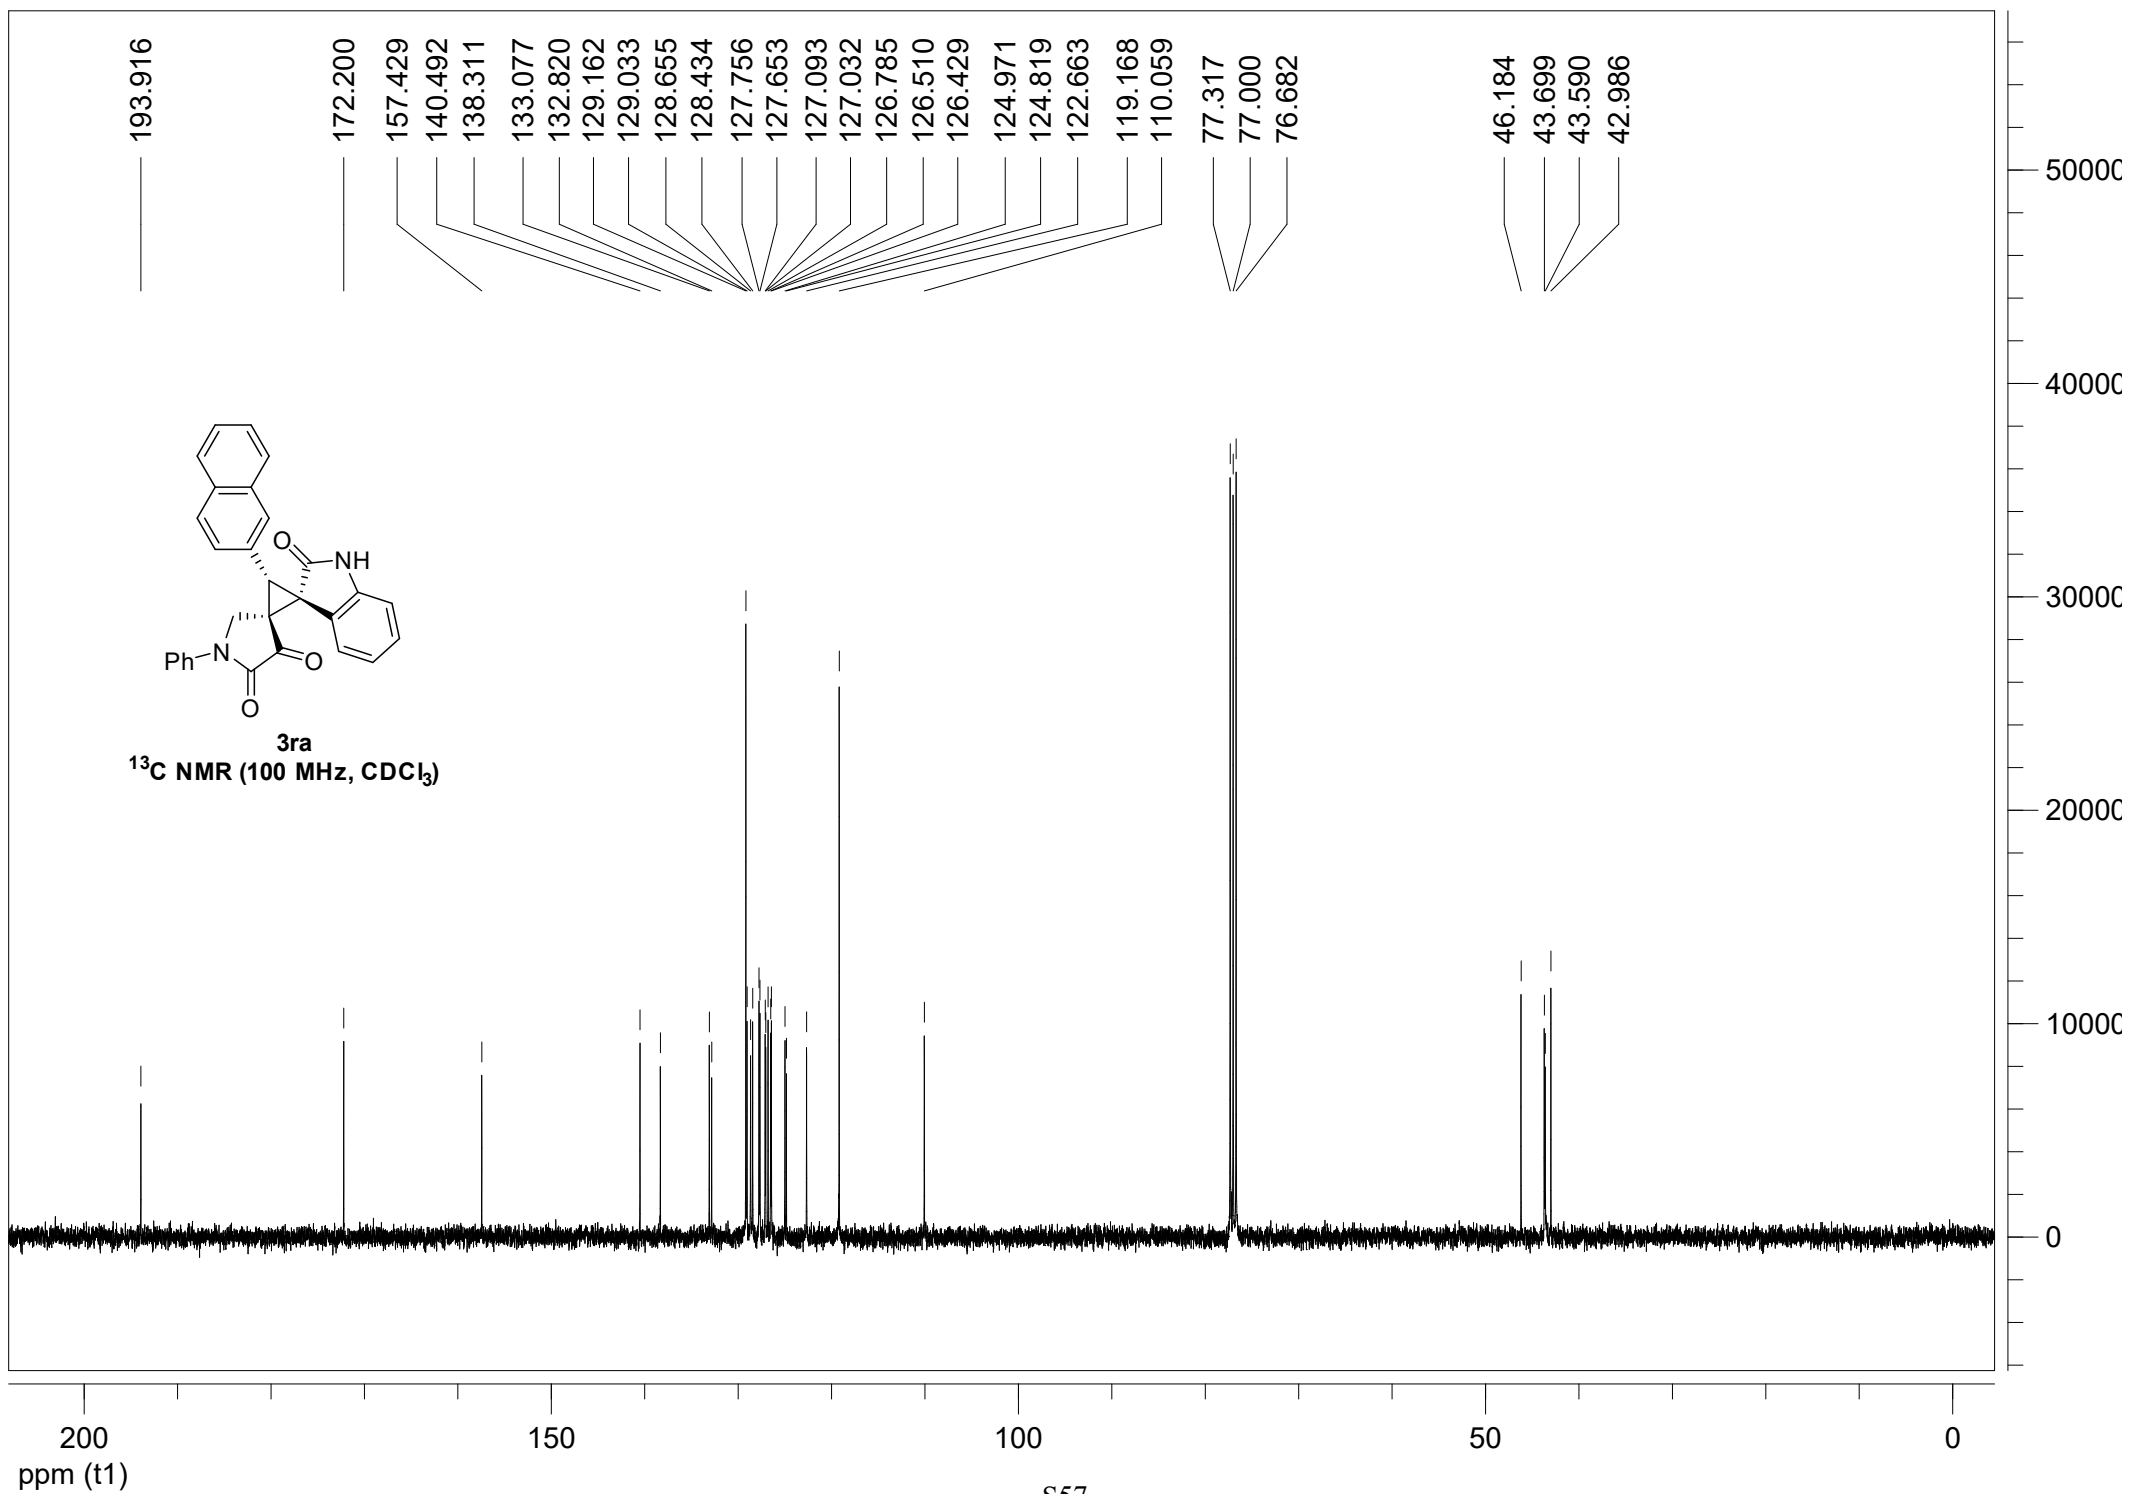

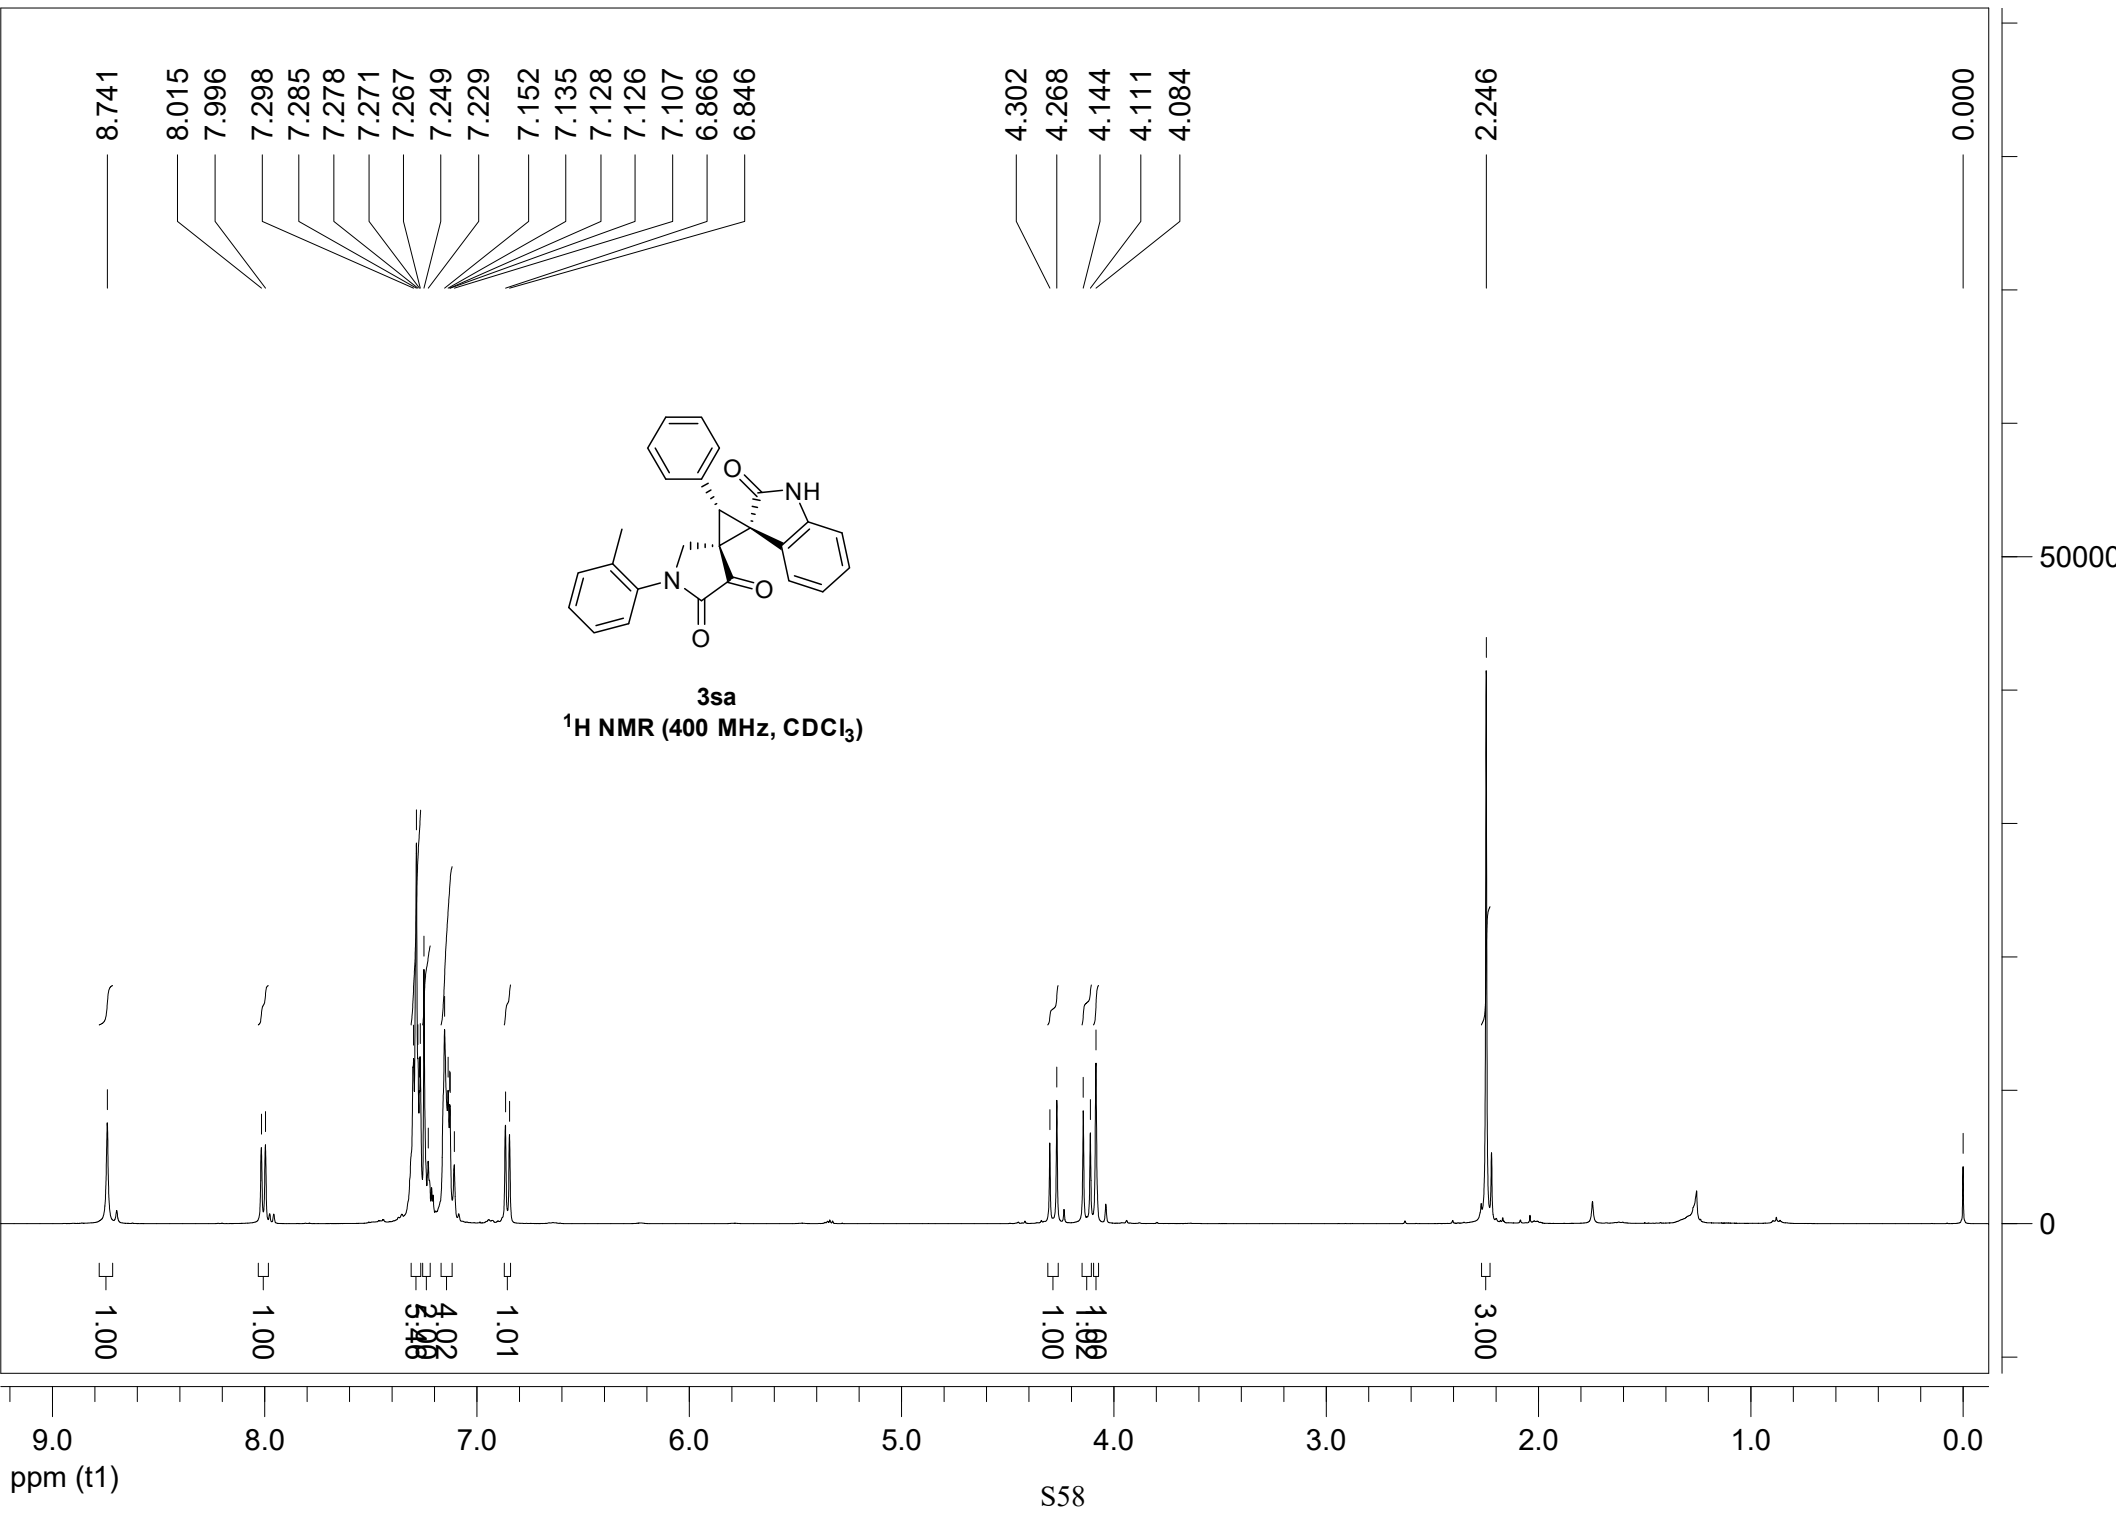

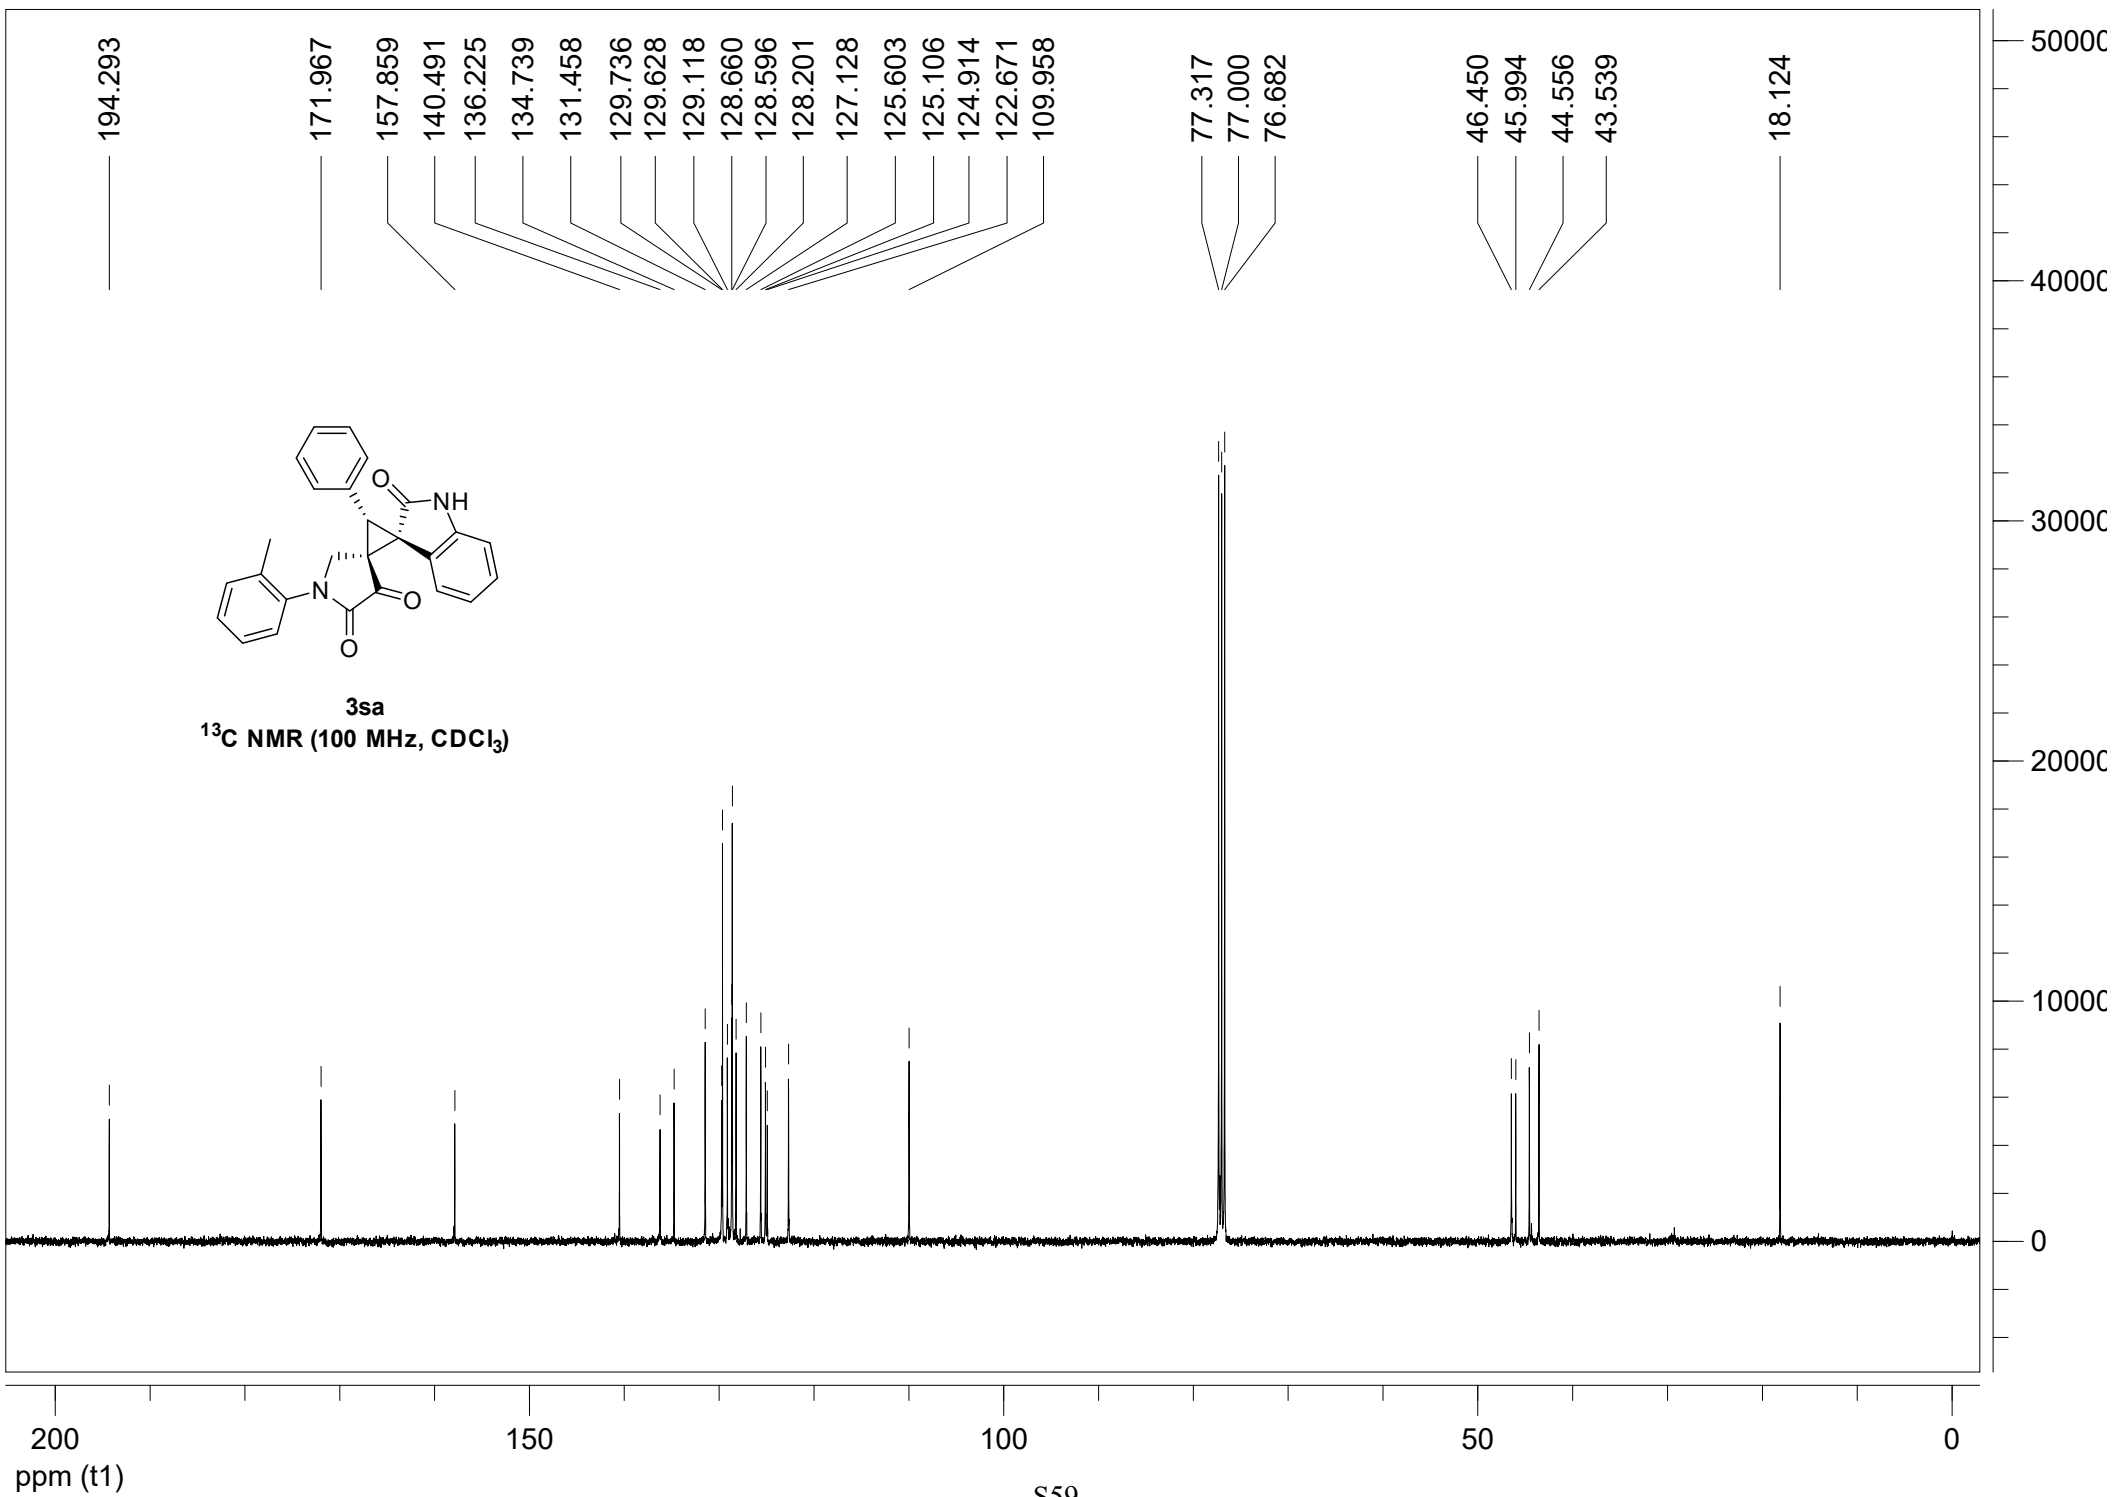

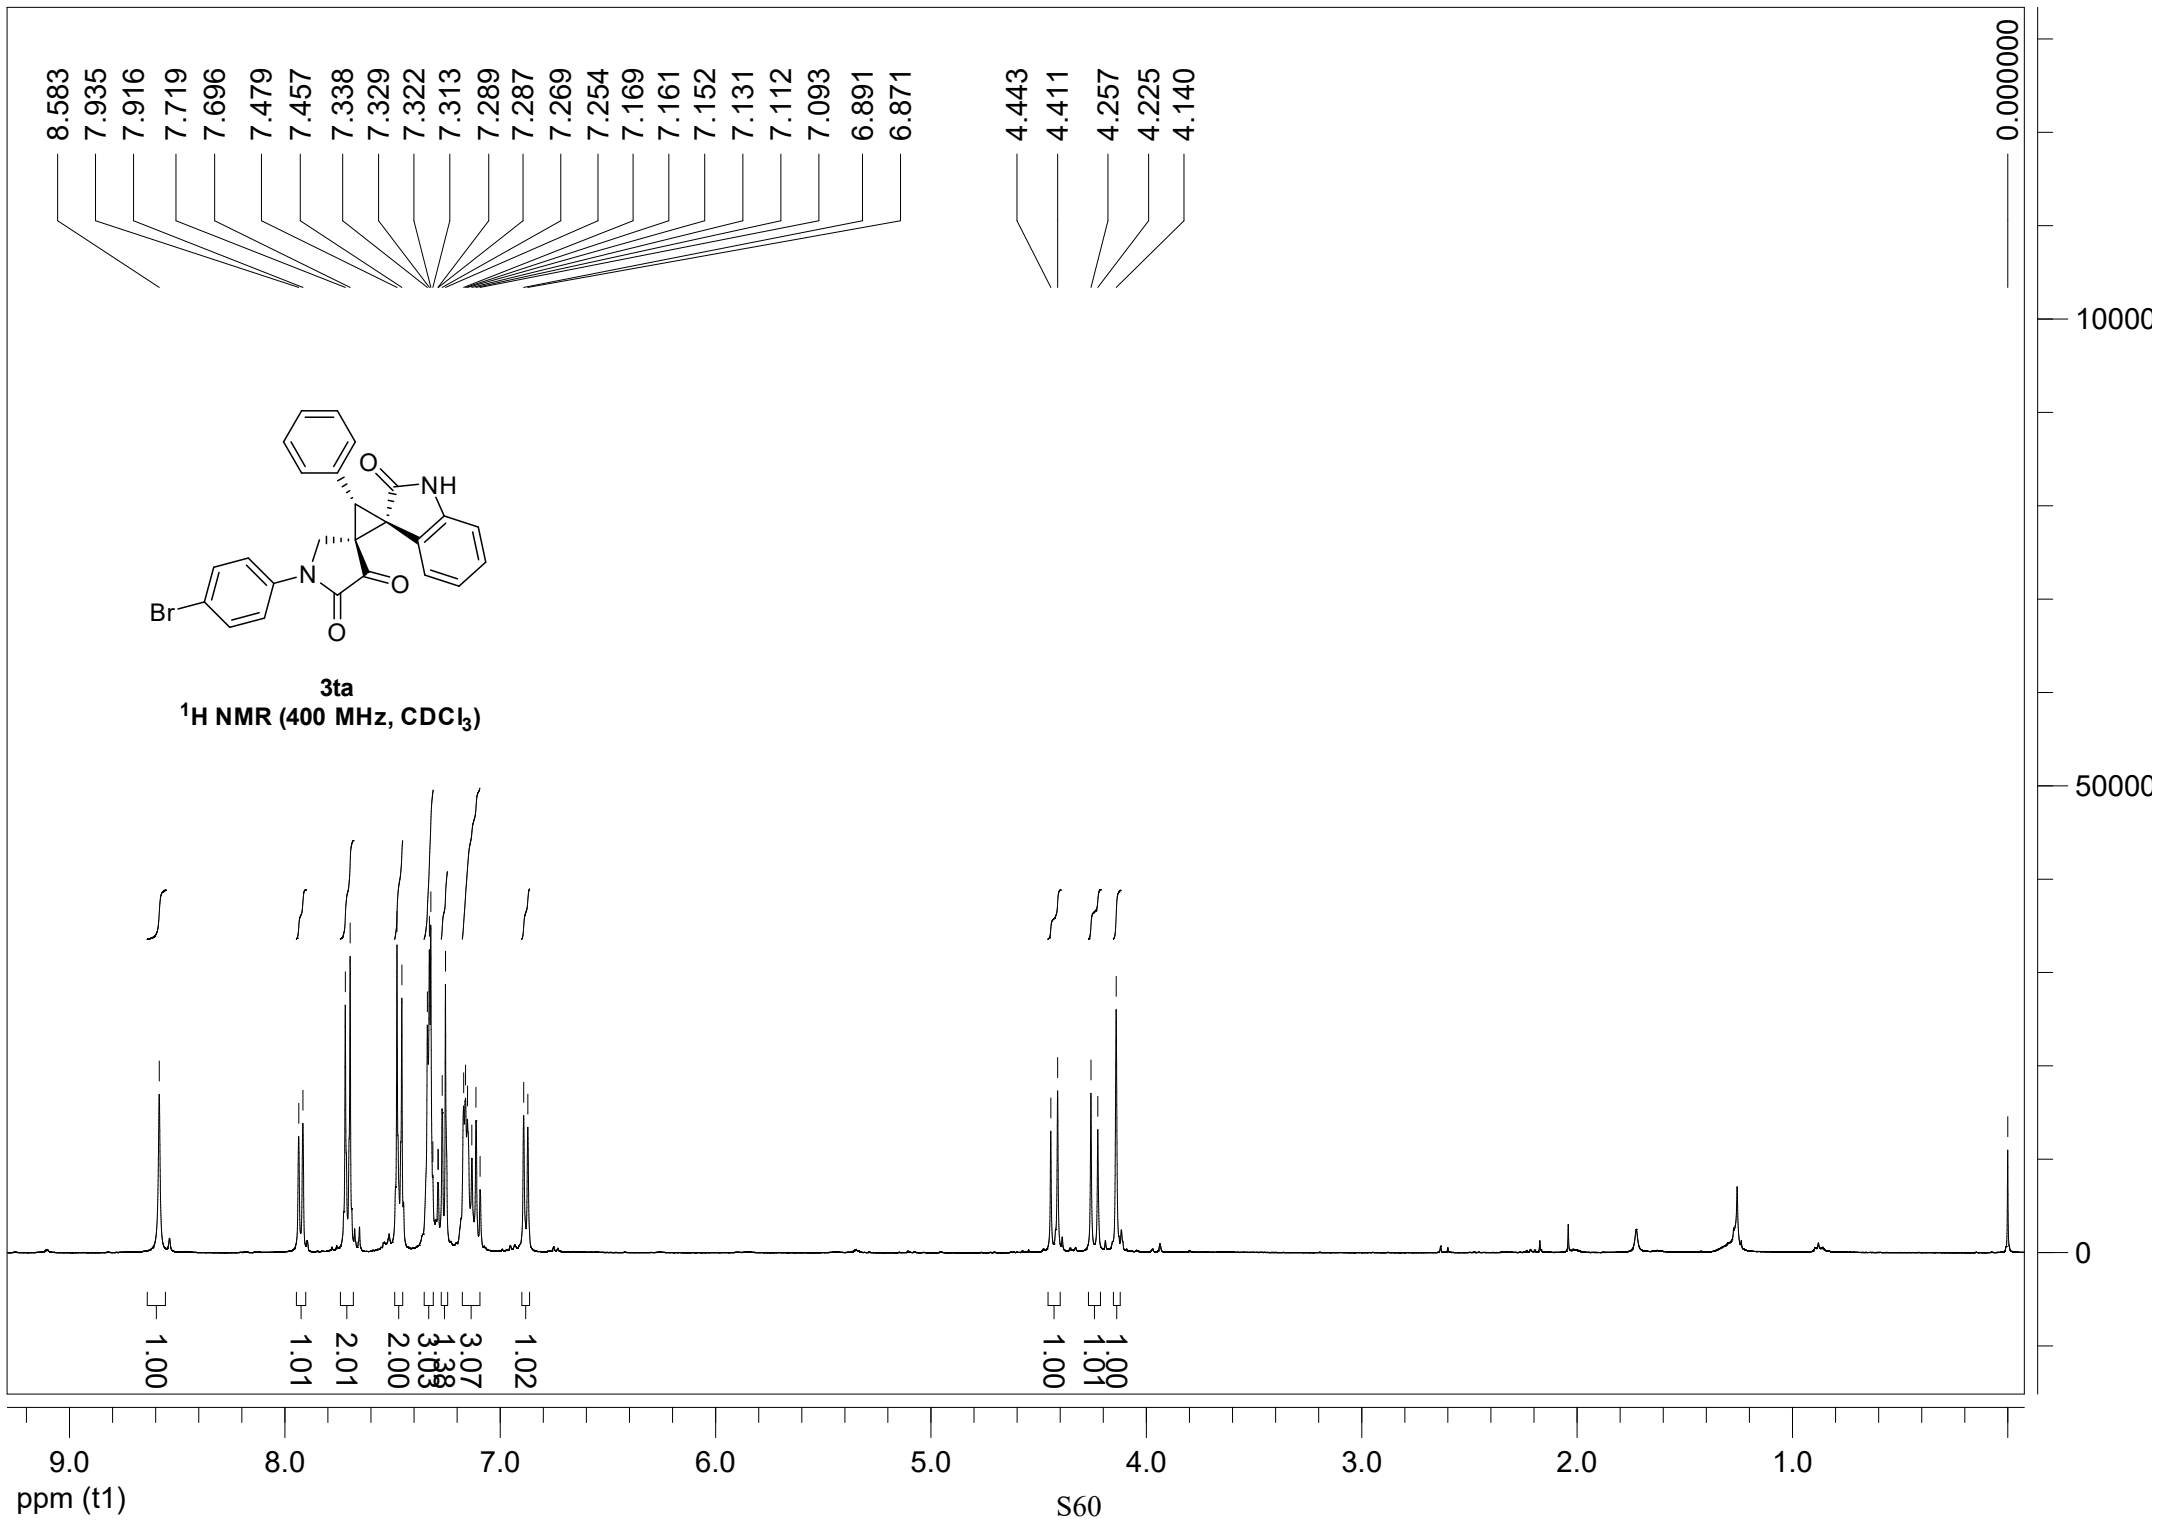

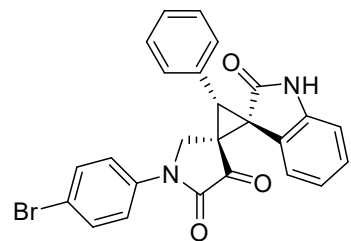

3ta

<sup>13</sup>C NMR (100 MHz, CDCl<sub>3</sub>)

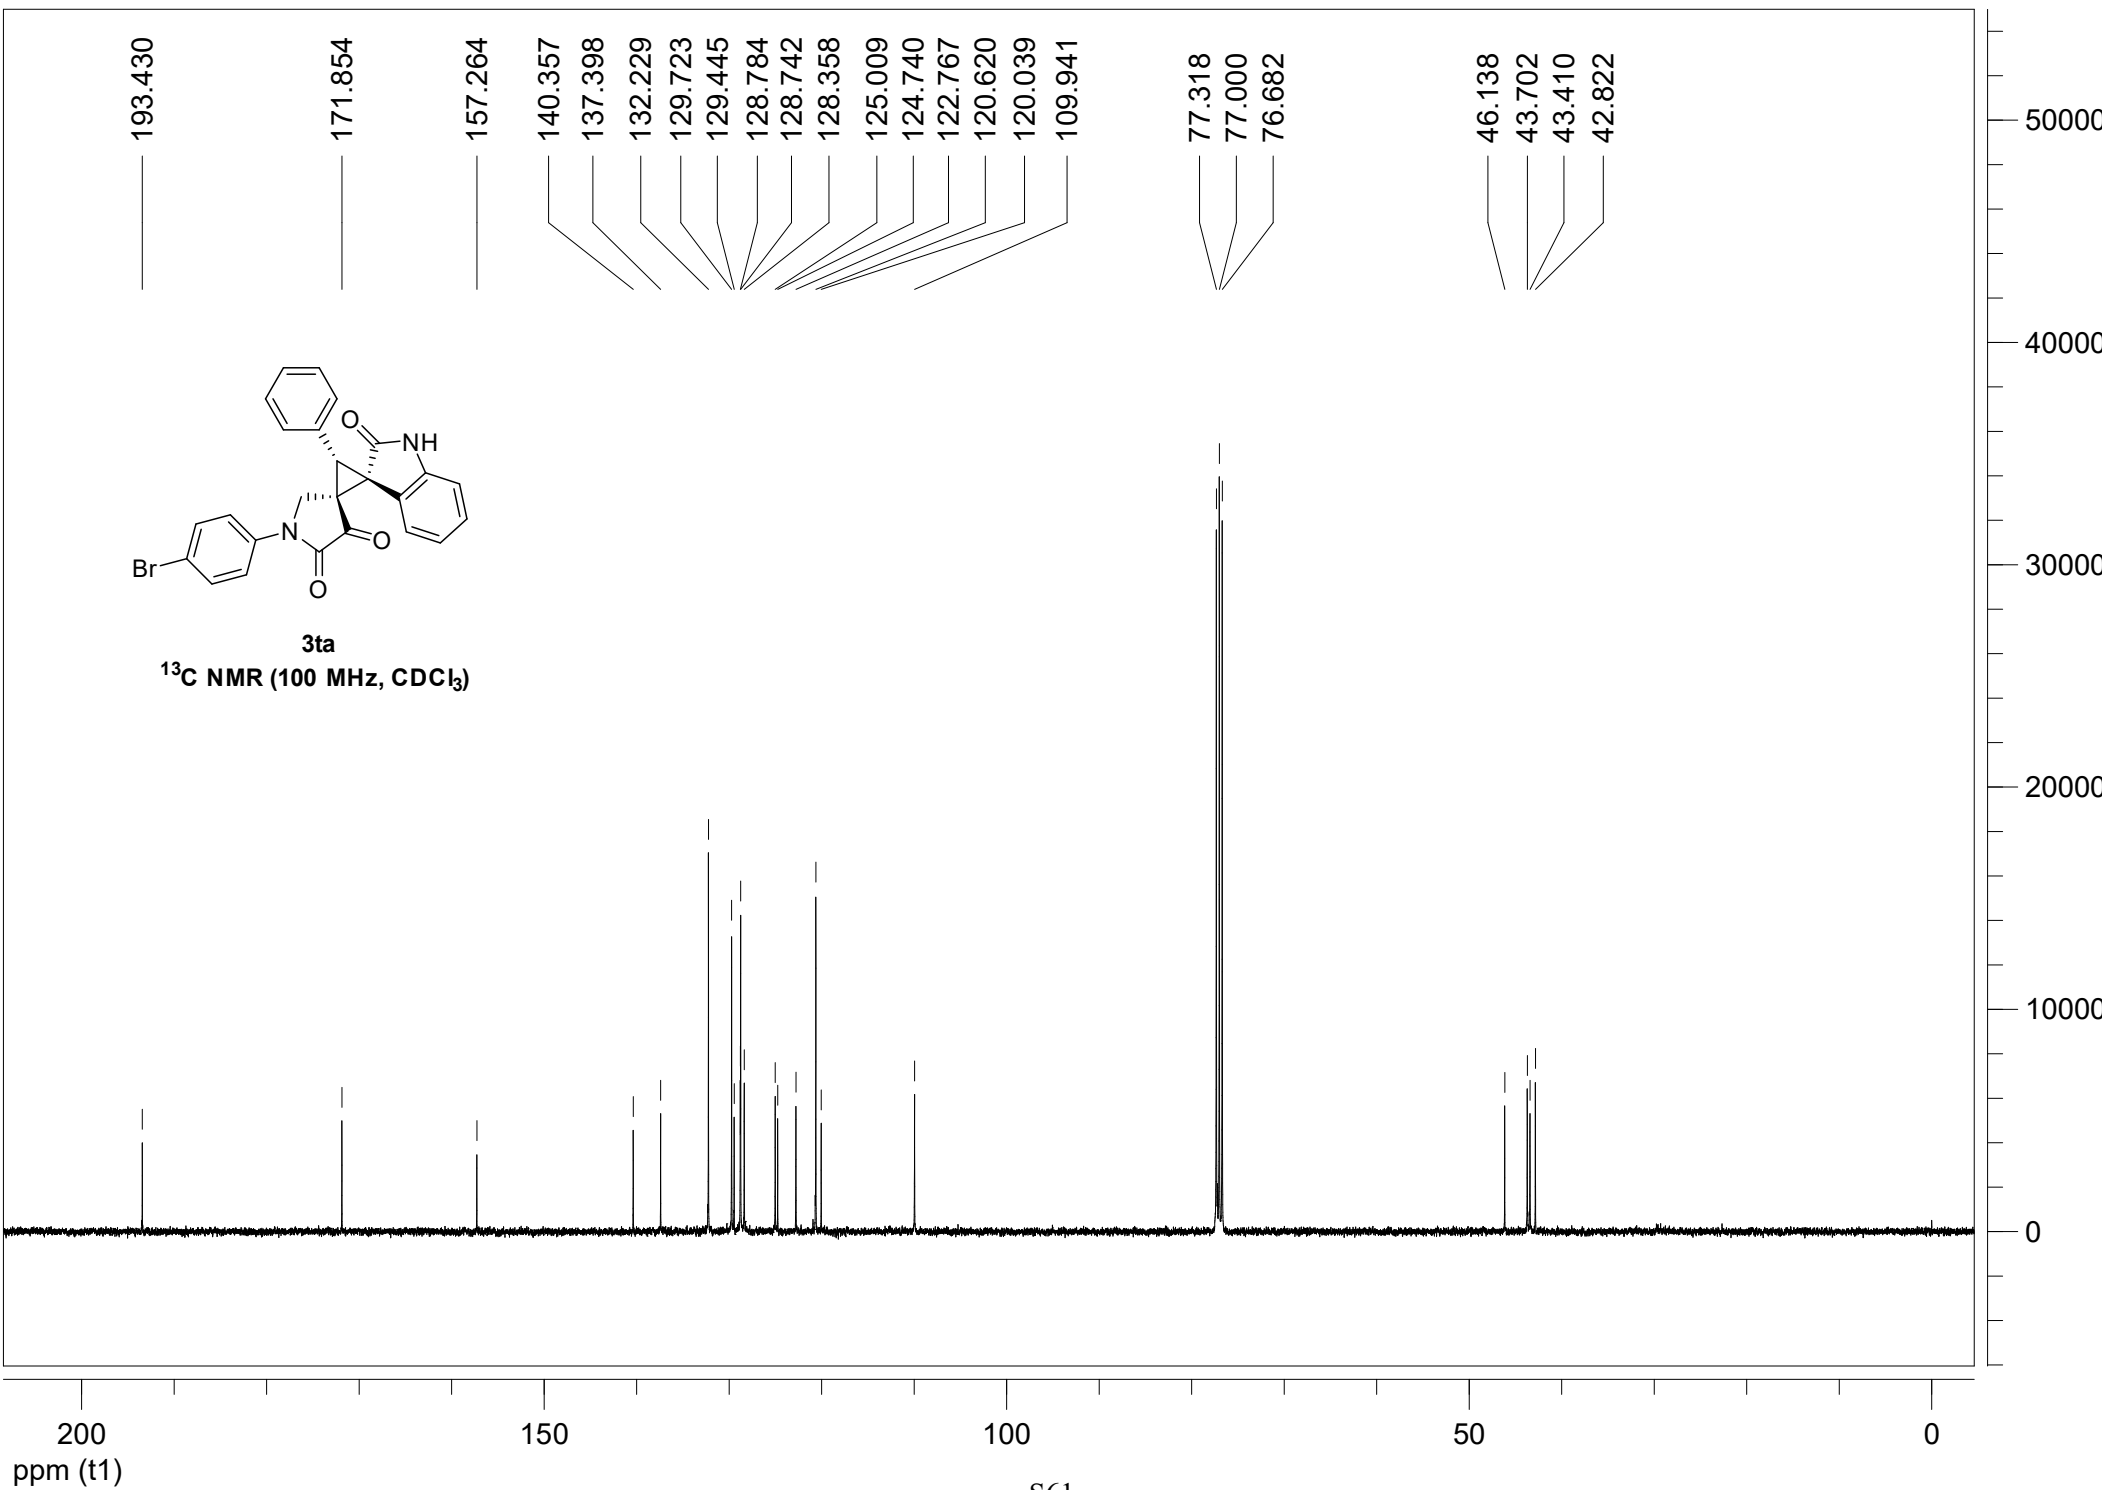

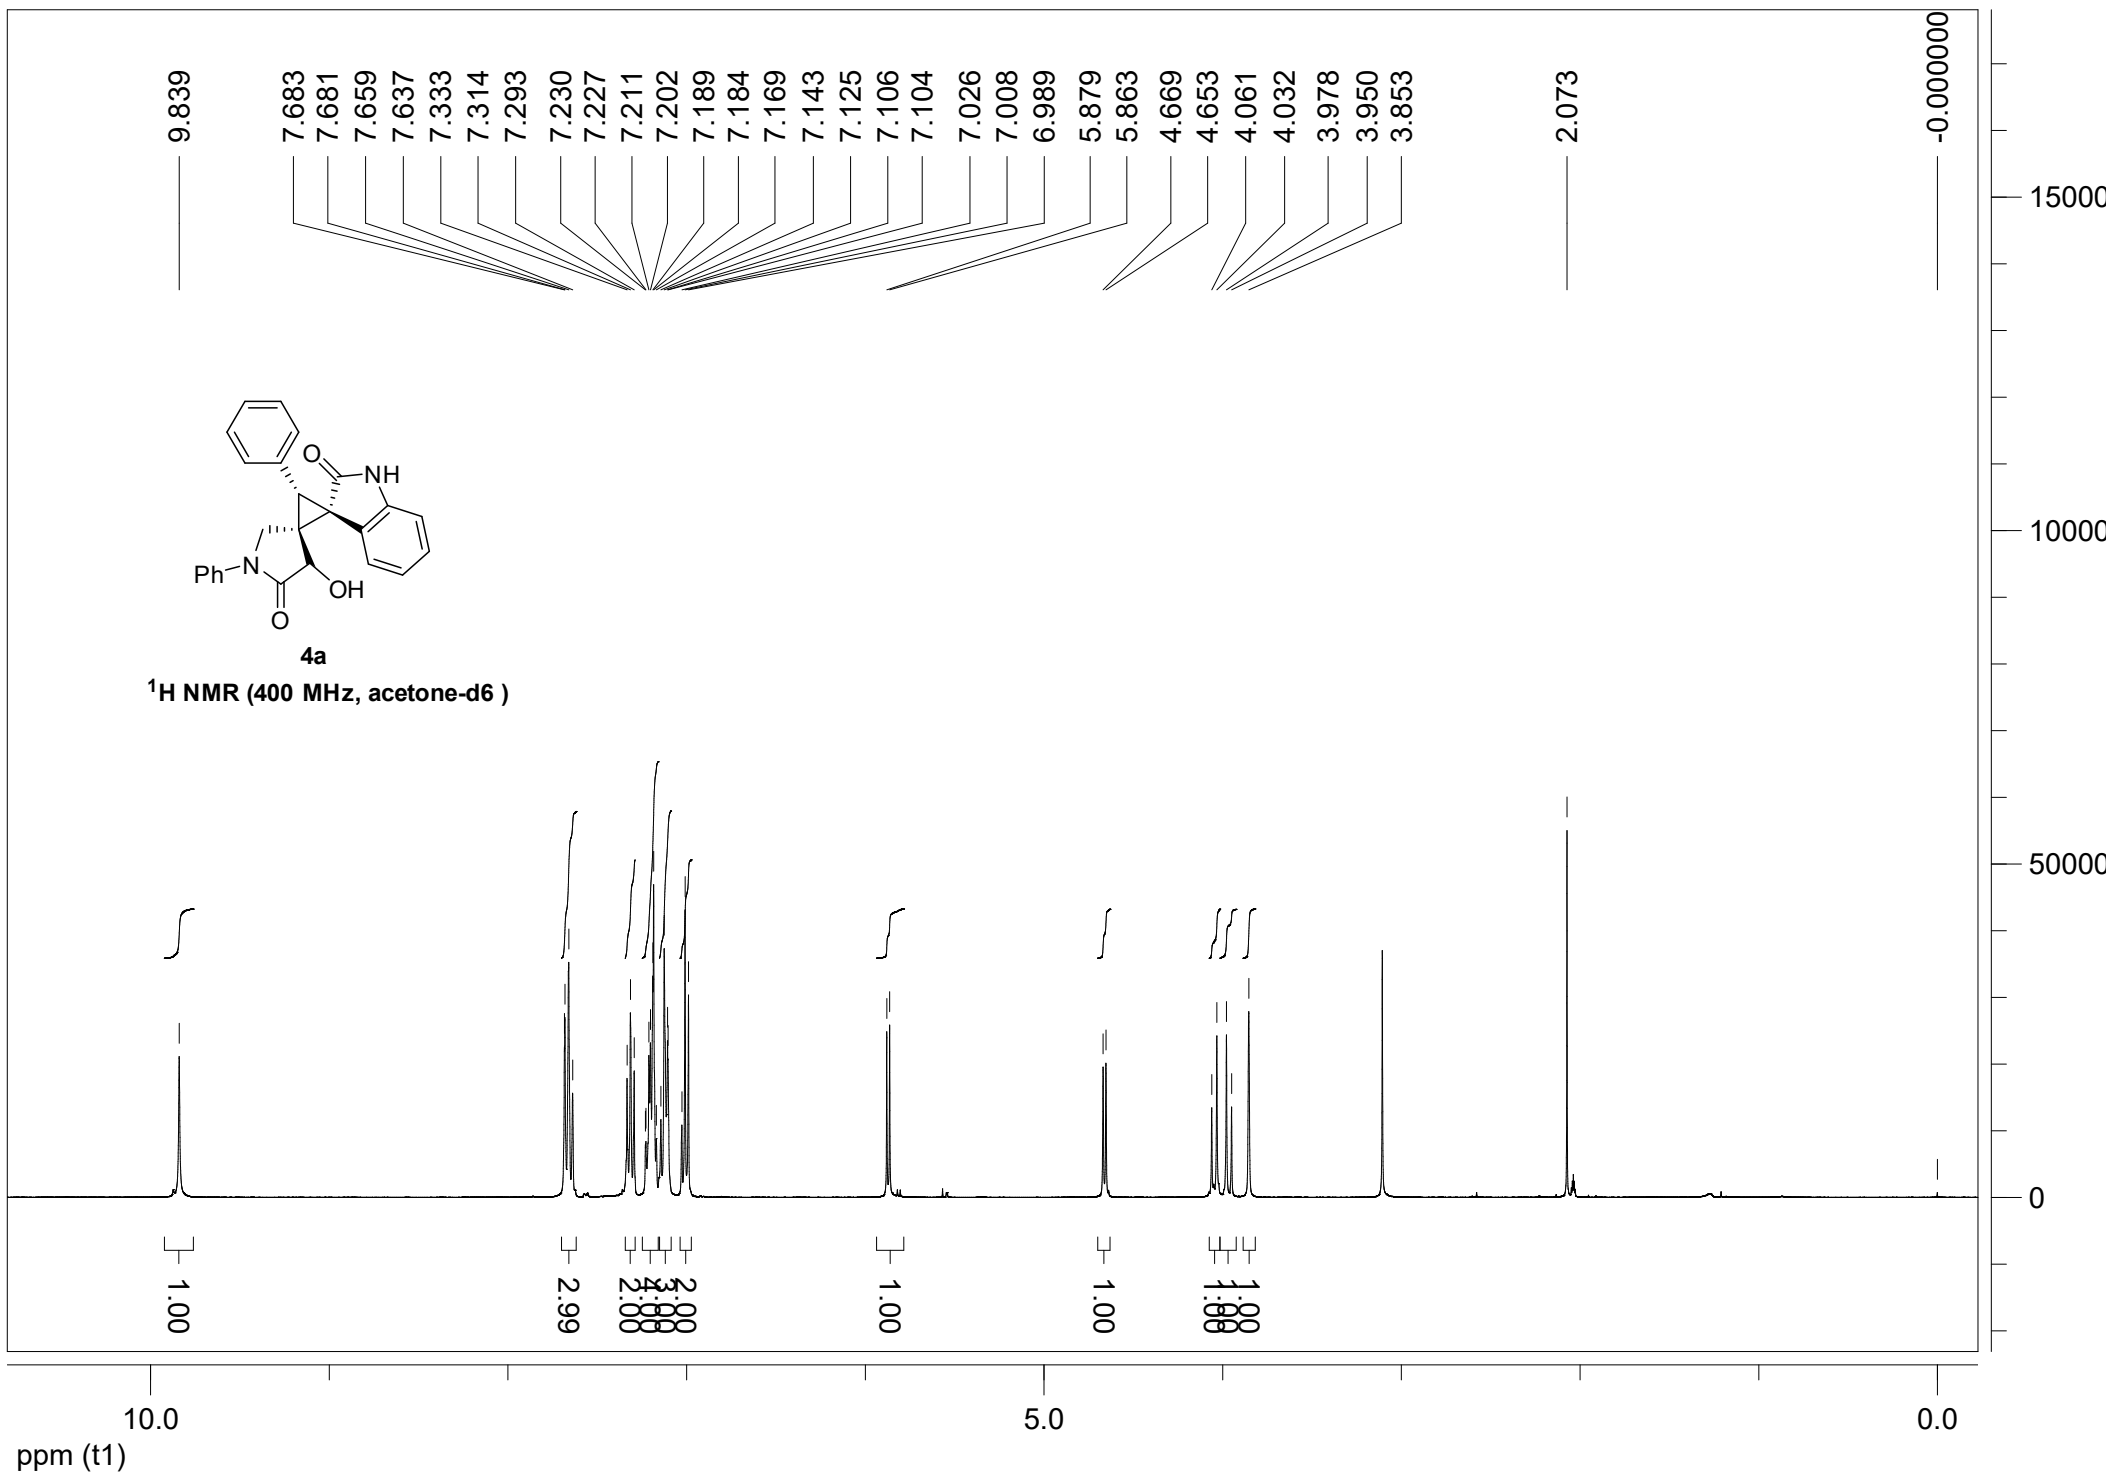

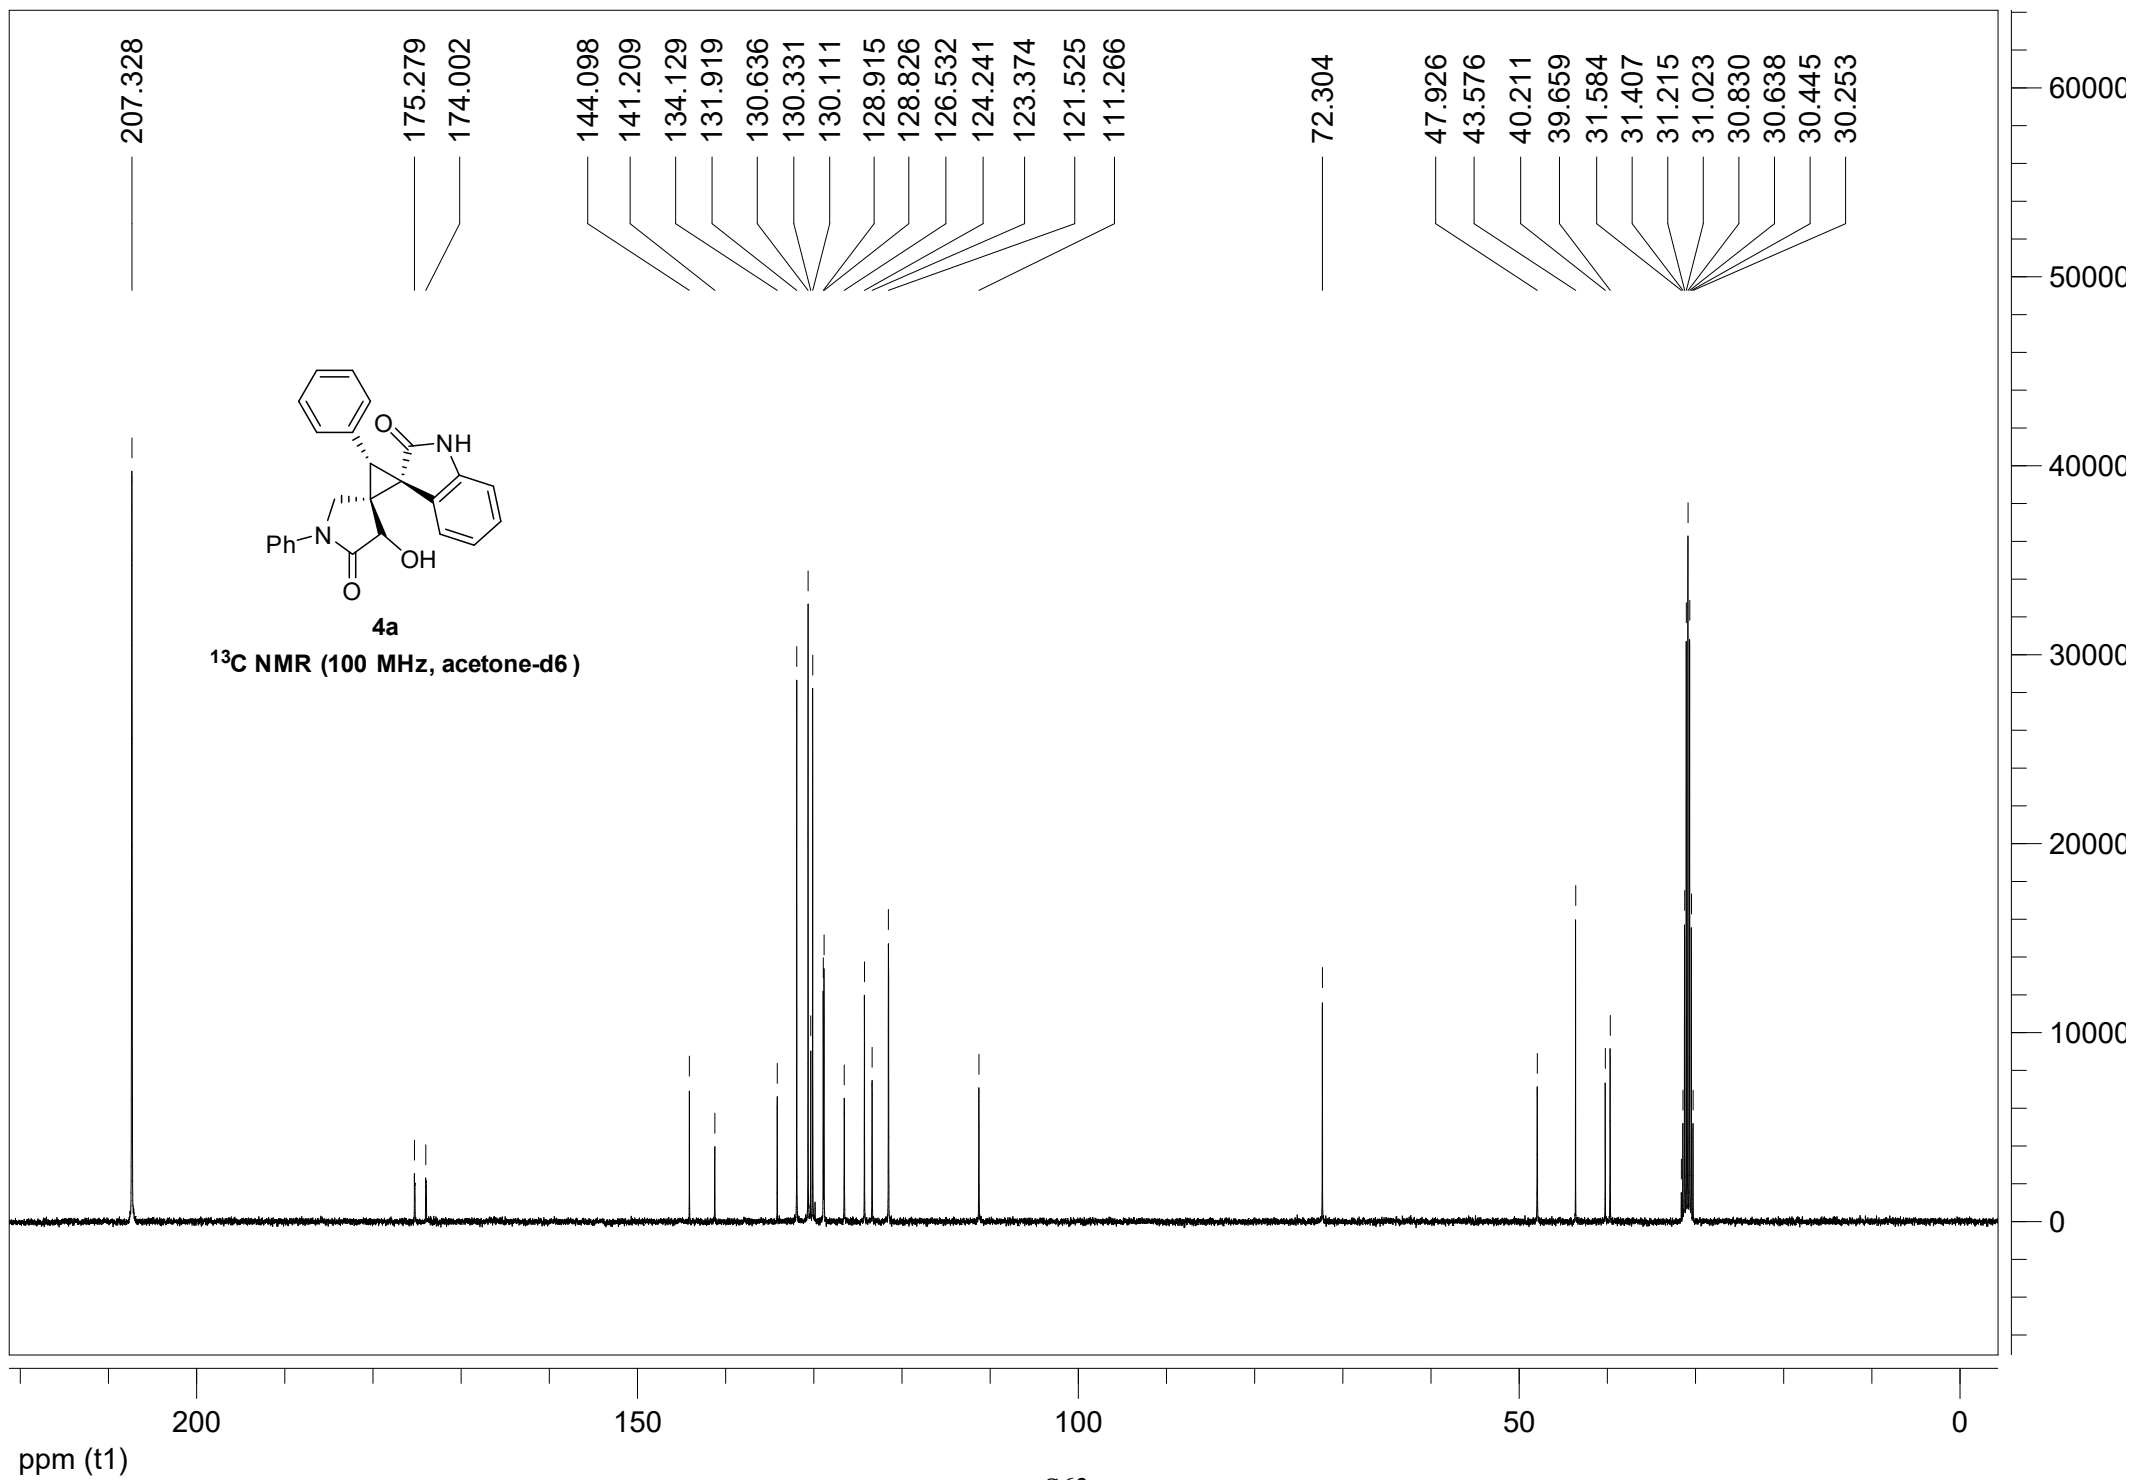



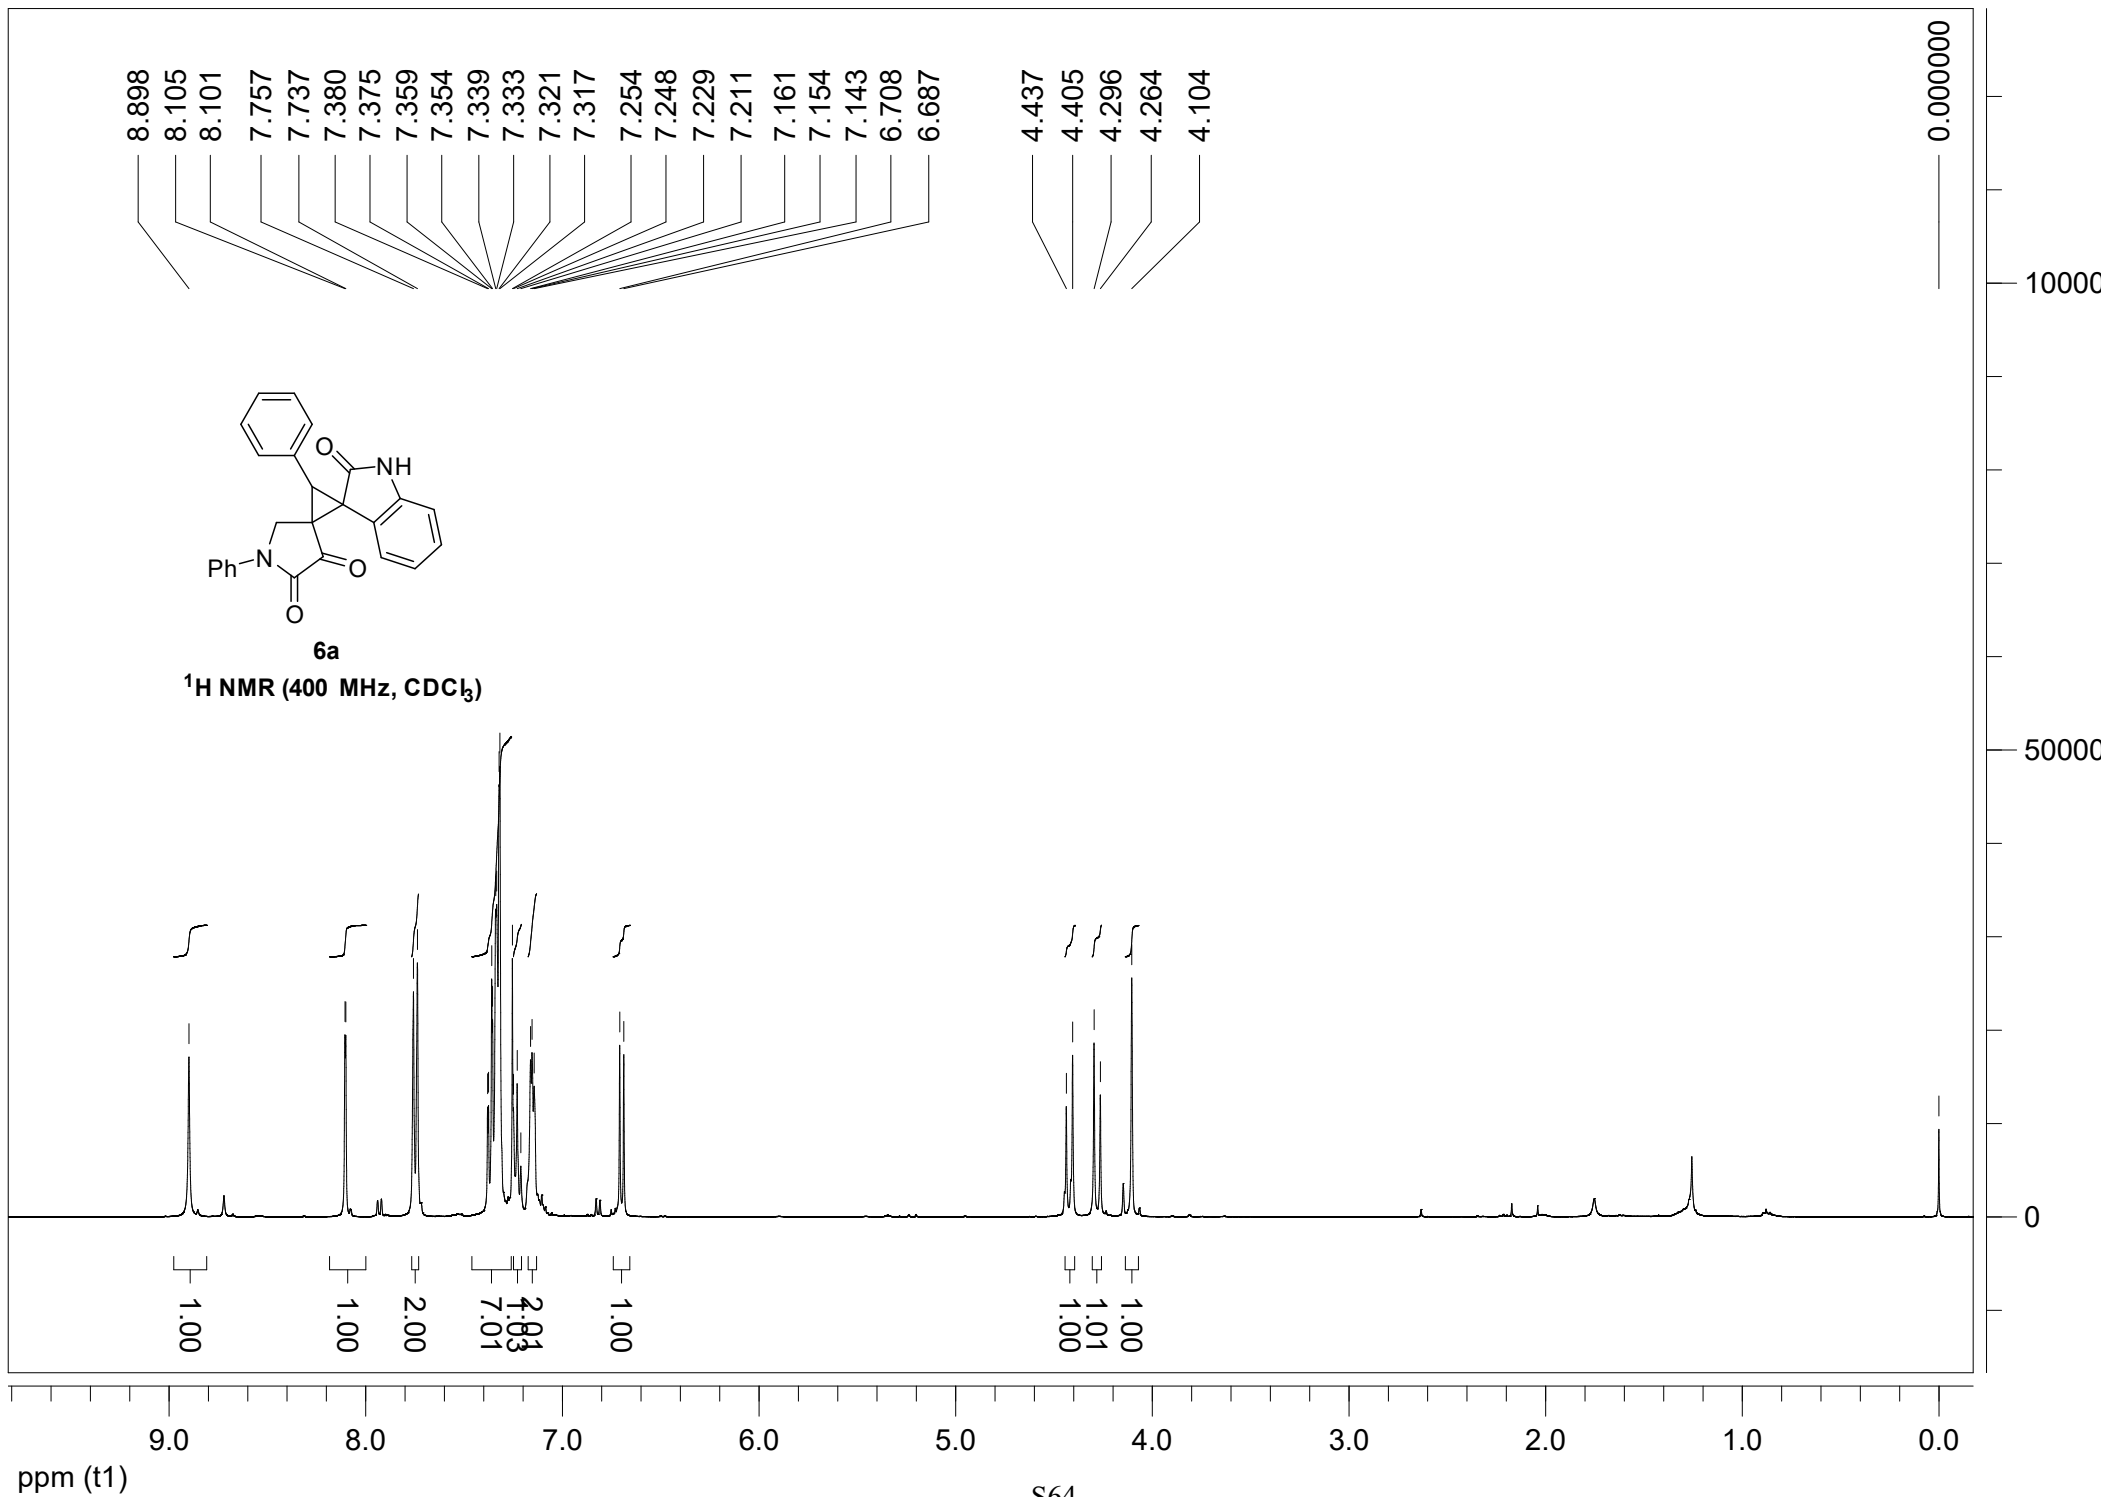

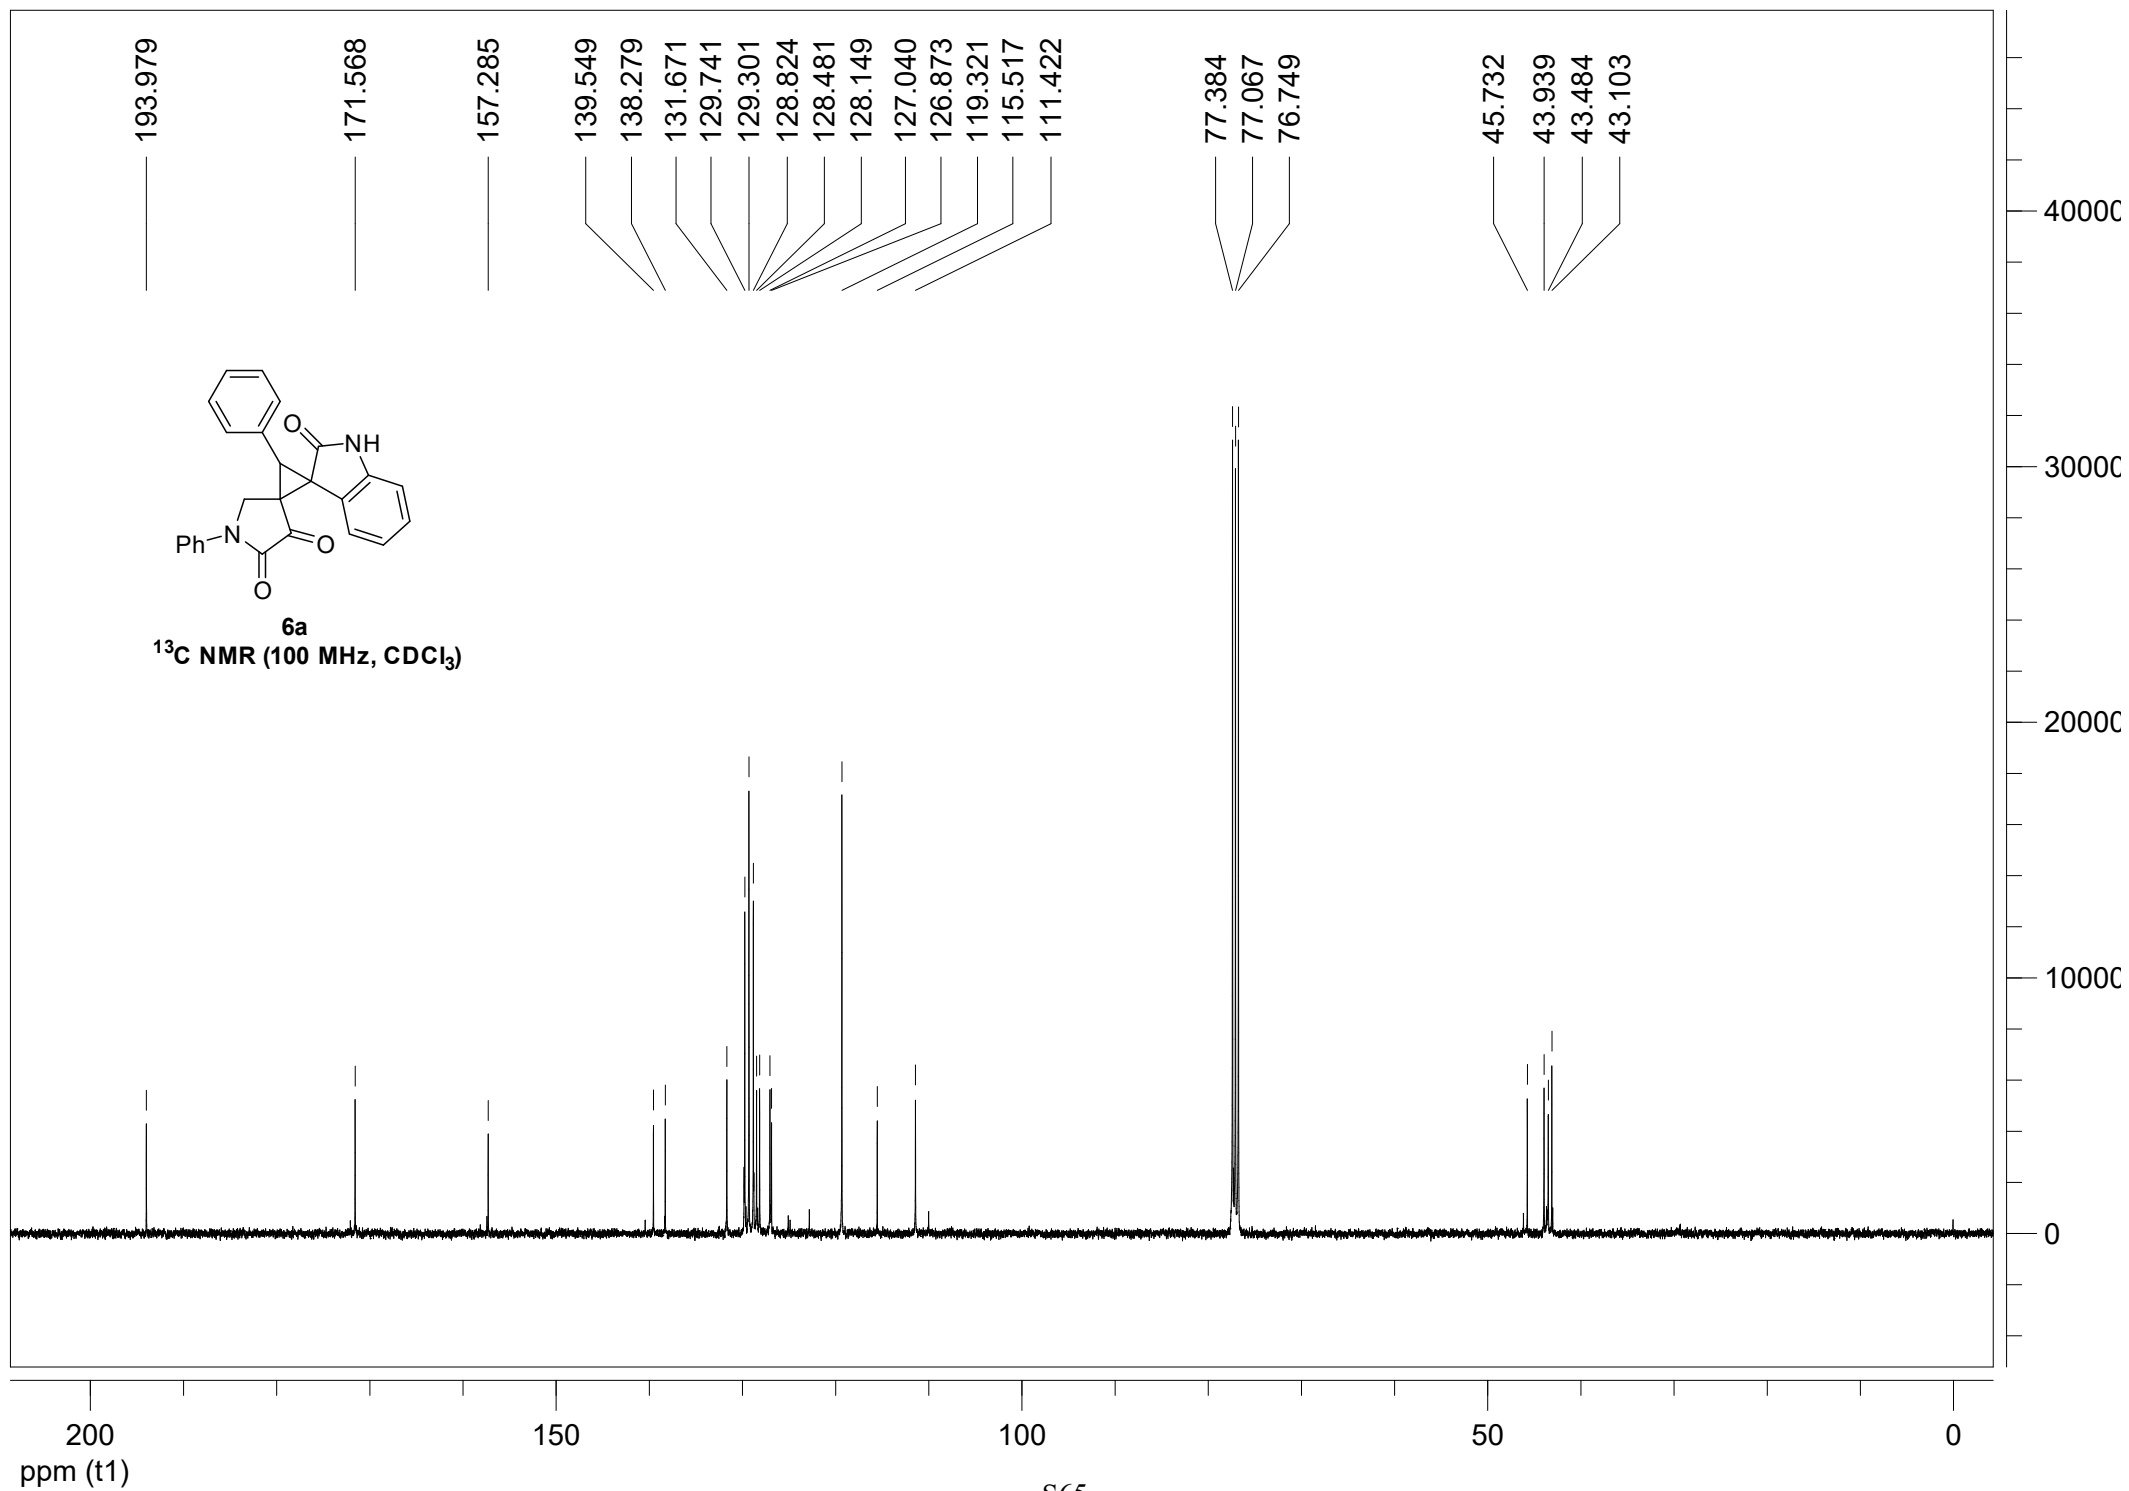

#### 4. Copies of HPLC chromatograms of products

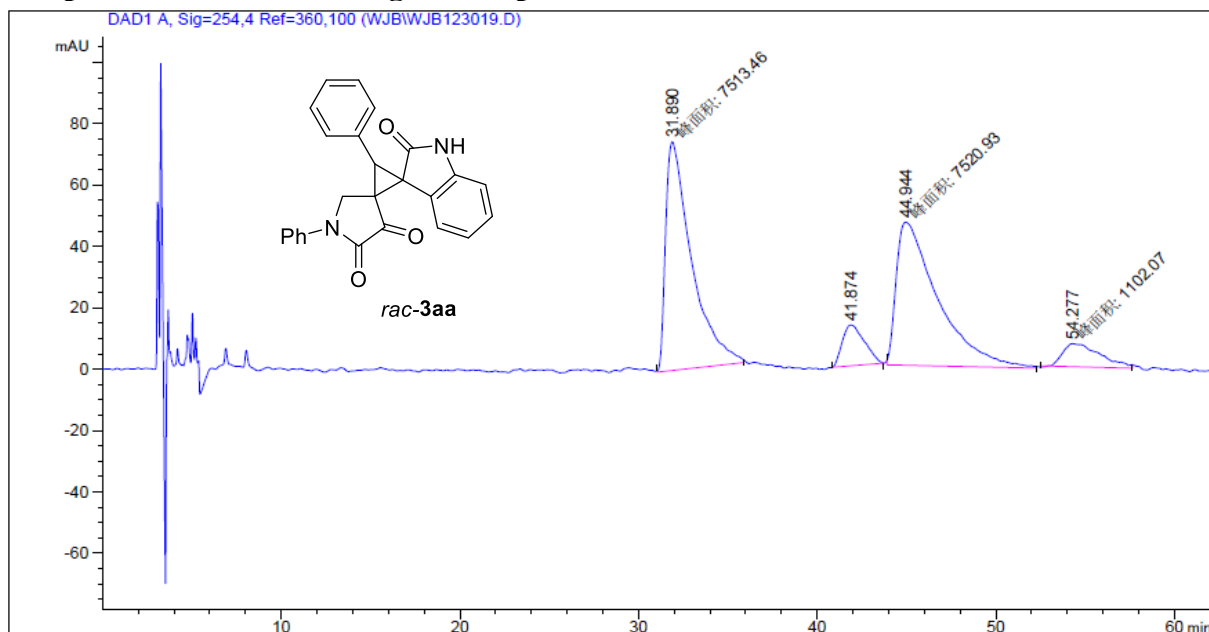

| # | Ret Time(min) | Width(min) | Area(Mau*s) | Height(mAU) | Area(%) |
|---|---------------|------------|-------------|-------------|---------|
| 1 | 31.890        | 1.6797     | 7513.46387  | 74.55093    | 43.4875 |
| 2 | 41.874        | 1.0170     | 1140.81799  | 13.29632    | 6.6030  |
| 3 | 44.944        | 2.6883     | 7520.92822  | 46.62727    | 43.5307 |
| 4 | 54.277        | 2.4545     | 1102.06836  | 7.48327     | 6.3787  |

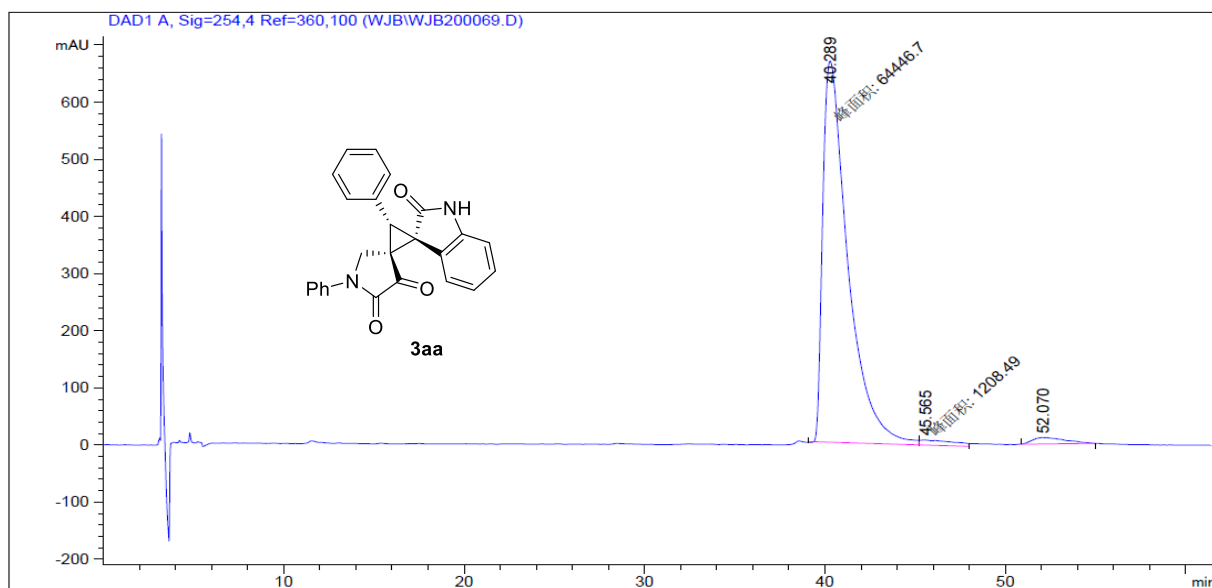

| # | Ret Time(min) | Width(min) | Area(Mau*s) | Height(mAU) | Area(%) |
|---|---------------|------------|-------------|-------------|---------|
| 1 | 40.289        | 1.6104     | 6.44467e4   | 666.99982   | 96.0759 |
| 2 | 45.565        | 2.2833     | 1208.48877  | 8.82124     | 1.8016  |
| 3 | 52.070        | 1.5139     | 1423.78442  | 11.06019    | 2.1225  |

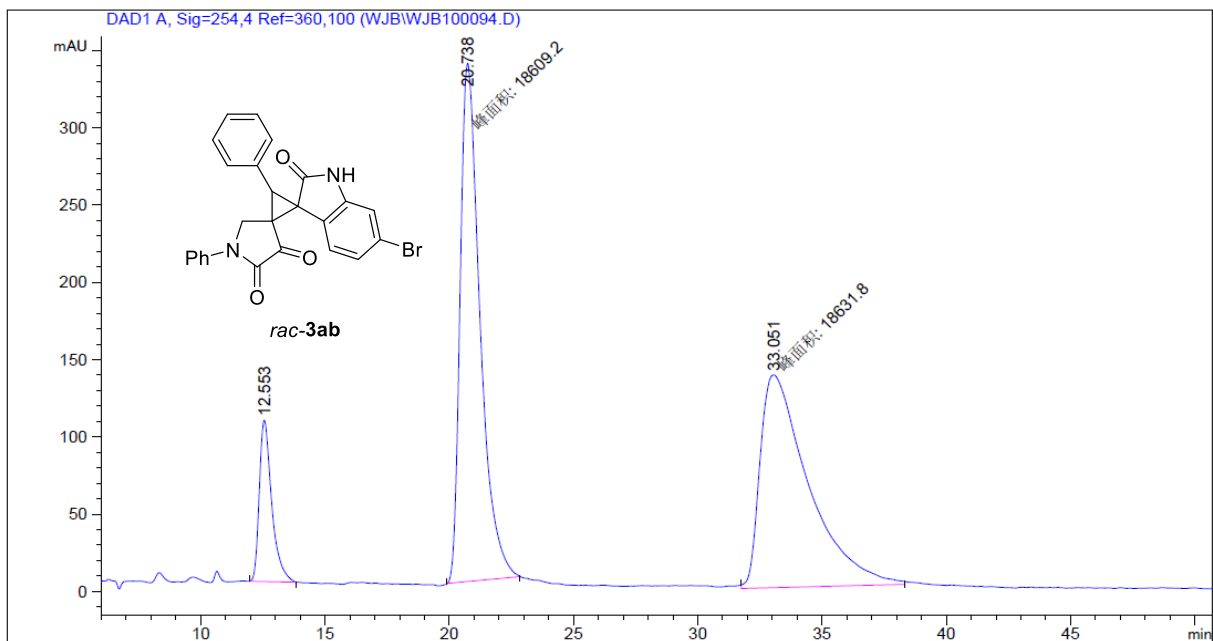

| # | Ret Time(min) | Width(min) | Area(Mau*s) | Height(mAU) | Area(%) |
|---|---------------|------------|-------------|-------------|---------|
| 1 | 12.553        | 0.5201     | 3630.78125  | 104.31587   | 8.8833  |
| 2 | 20.738        | 0.9248     | 1.86092e4   | 335.36548   | 45.5306 |
| 3 | 33.051        | 2.2572     | 1.86318e4   | 137.57329   | 45.5860 |

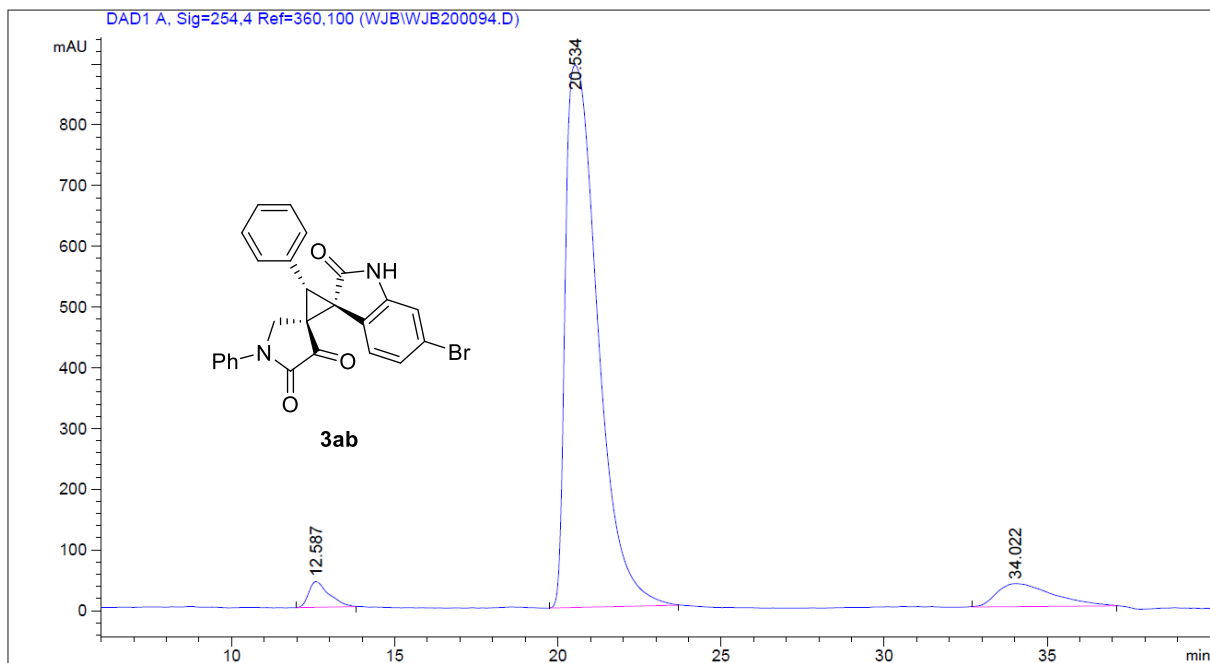

| # | Ret Time(min) | Width(min) | Area(Mau*s) | Height(mAU) | Area(%) |
|---|---------------|------------|-------------|-------------|---------|
| 1 | 12.587        | 0.6254     | 1820.58130  | 42.35913    | 2.6792  |
| 2 | 20.534        | 0.9126     | 6.15782e4   | 892.90381   | 90.6213 |
| 3 | 34.022        | 1.4710     | 4552.39062  | 37.85654    | 6.6995  |

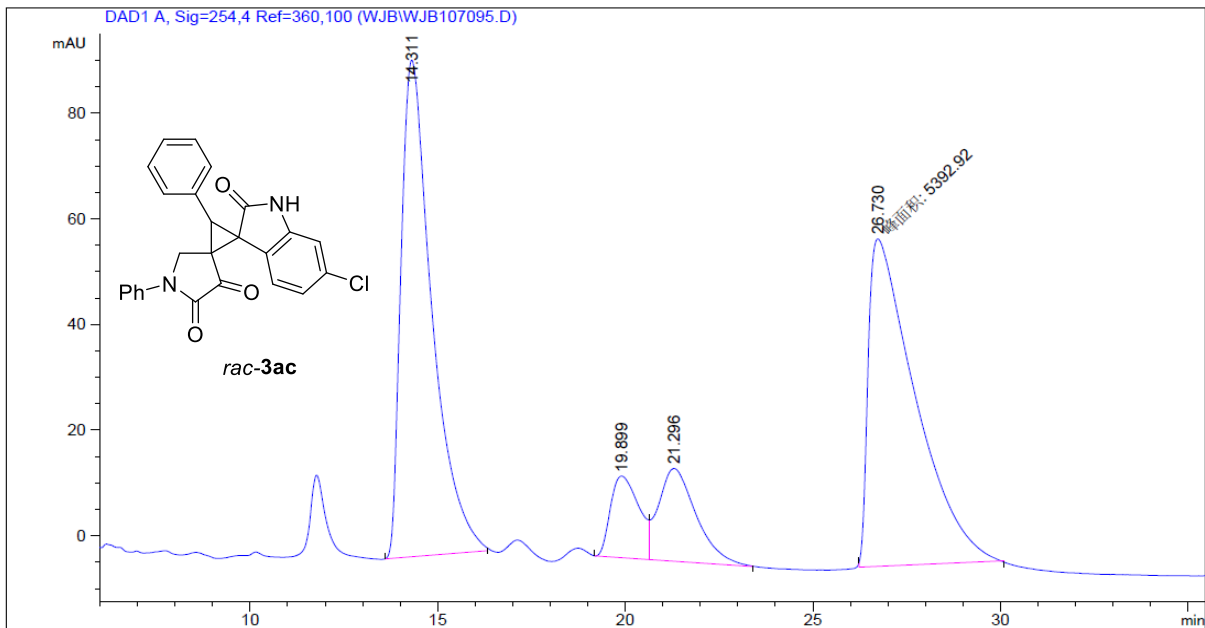

| # | Ret Time(min) | Width(min) | Area(Mau*s) | Height(mAU) | Area(%) |
|---|---------------|------------|-------------|-------------|---------|
| 1 | 14.311        | 0.8521     | 5385.45947  | 94.03922    | 42.0035 |
| 2 | 19.899        | 0.7582     | 819.05292   | 15.45826    | 6.3881  |
| 3 | 21.296        | 0.9309     | 1224.02295  | 17.56669    | 9.5467  |
| 4 | 26.730        | 1.4499     | 5392.91797  | 61.99150    | 42.0617 |

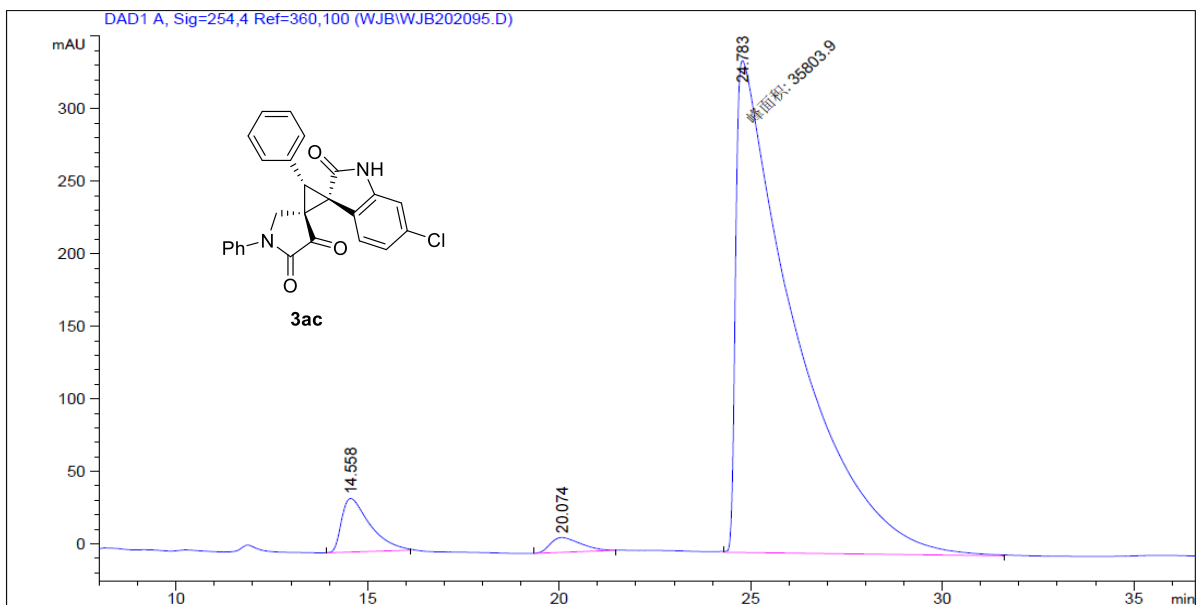

| # | Ret Time(min) | Width(min) | Area(Mau*s) | Height(mAU) | Area(%) |
|---|---------------|------------|-------------|-------------|---------|
| 1 | 14.558        | 0.7415     | 1903.02344  | 36.90892    | 4.9730  |
| 2 | 20.074        | 0.7563     | 559.96442   | 10.20267    | 1.4633  |
| 3 | 24.783        | 1.7602     | 3.58039e4   | 339.00955   | 93.5637 |

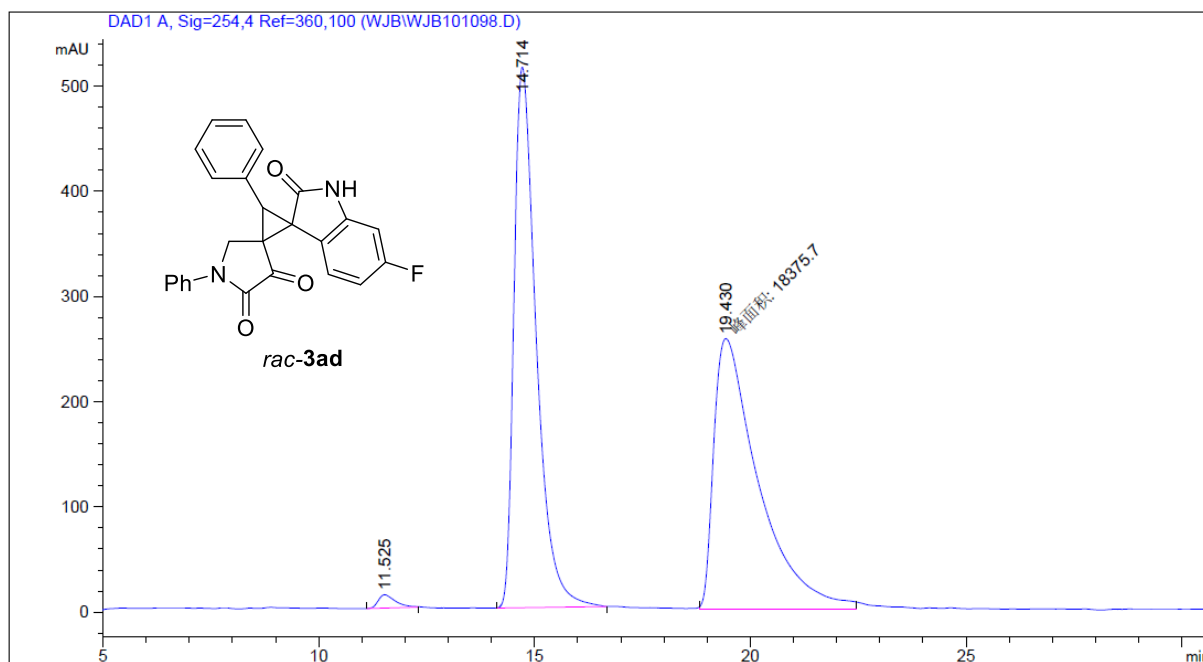

| # | Ret Time(min) | Width(min) | Area(Mau*s) | Height(mAU) | Area(%) |
|---|---------------|------------|-------------|-------------|---------|
| 1 | 11.525        | 0.3996     | 350.15421   | 12.70099    | 0.9429  |
| 2 | 14.714        | 0.5380     | 1.84099e4   | 513.85010   | 49.5746 |
| 3 | 19.430        | 1.1924     | 1.83757e4   | 256.85327   | 49.4825 |

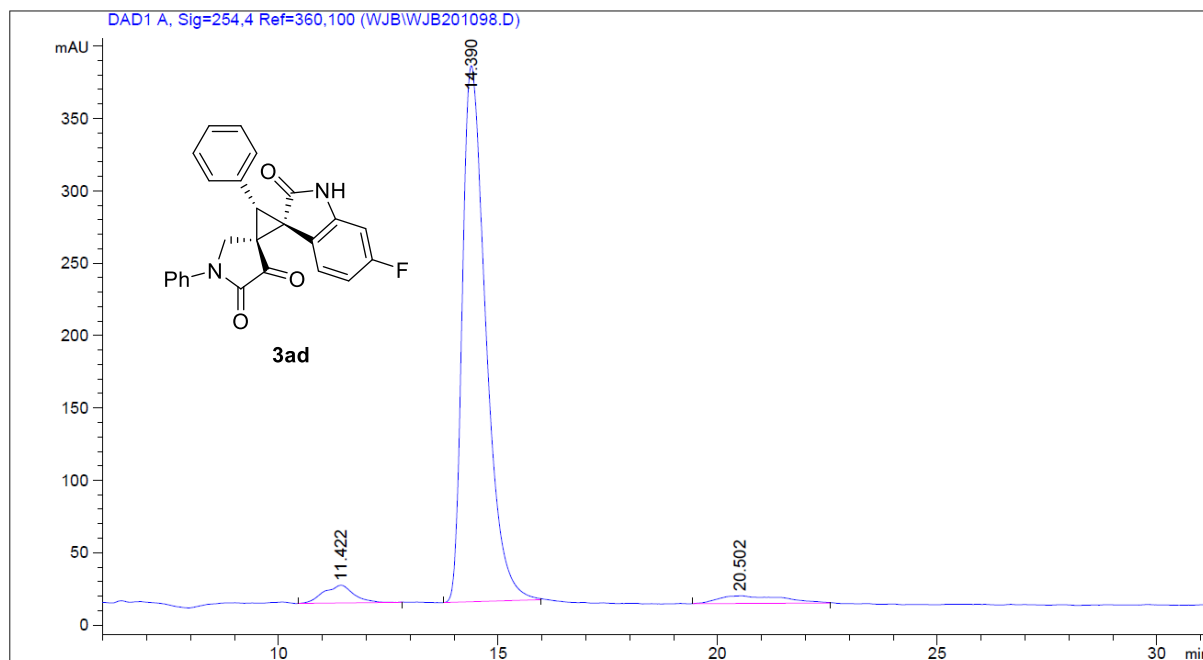

| # | Ret Time(min) | Width(min) | Area(Mau*s) | Height(mAU) | Area(%) |
|---|---------------|------------|-------------|-------------|---------|
| 1 | 11.422        | 0.6220     | 582.56946   | 12.26800    | 3.9209  |
| 2 | 14.390        | 0.5644     | 1.37237e4   | 370.30884   | 92.3651 |
| 3 | 20.502        | 1.2362     | 551.83246   | 5.24205     | 3.7140  |

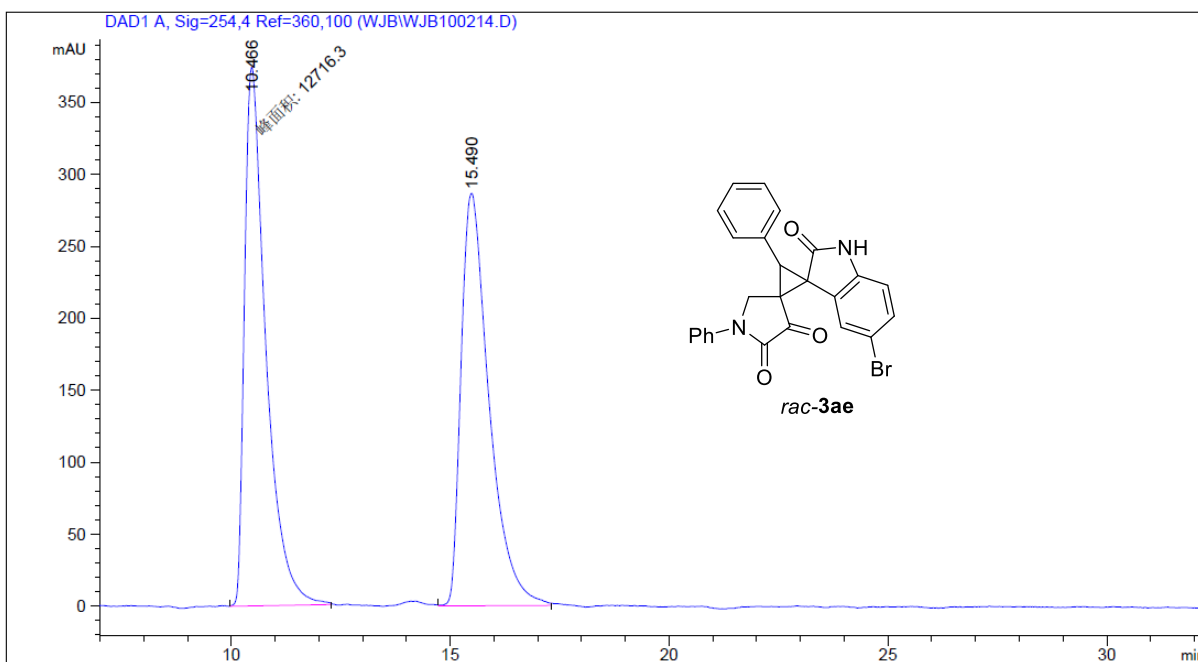

| # | Ret Time(min) | Width(min) | Area(Mau*s) | Height(mAU) | Area(%) |
|---|---------------|------------|-------------|-------------|---------|
| 1 | 10.466        | 0.5663     | 1.27163e4   | 374.26309   | 49.9555 |
| 2 | 15.490        | 0.6567     | 1.27390e4   | 286.50803   | 50.0445 |

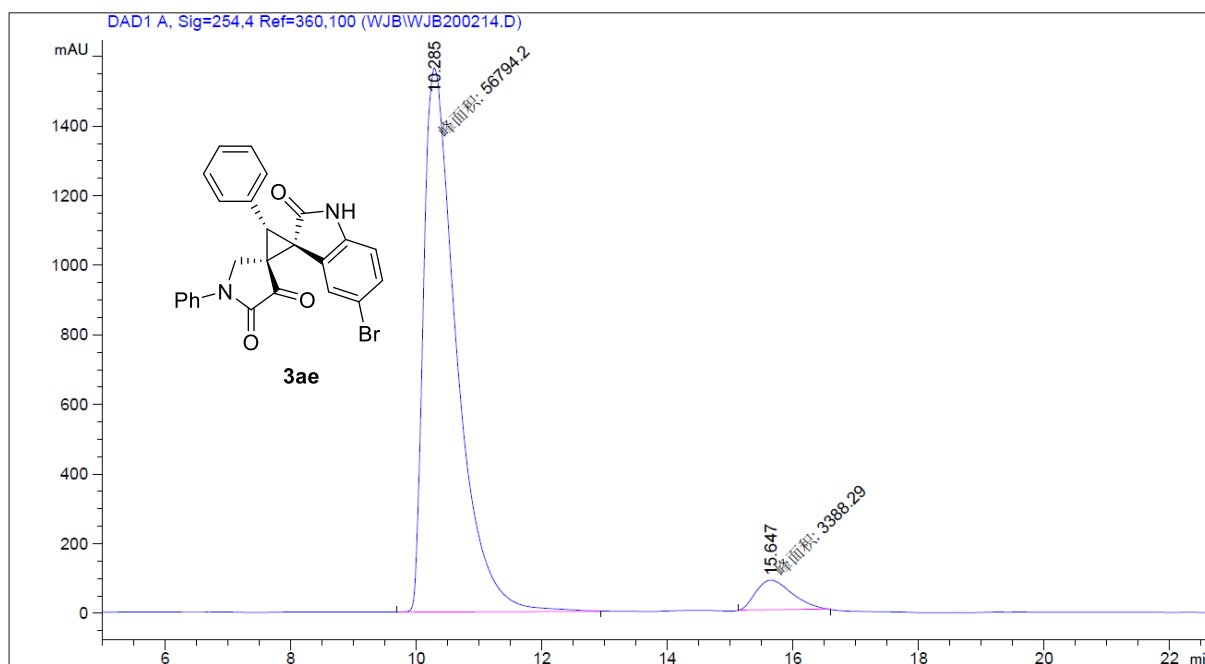

| # | Ret Time(min) | Width(min) | Area(Mau*s) | Height(mAU) | Area(%) |
|---|---------------|------------|-------------|-------------|---------|
| 1 | 10.285        | 0.6053     | 5.67942e4   | 1563.85767  | 94.3700 |
| 2 | 15.647        | 0.6658     | 3388.29102  | 84.81294    | 5.6300  |

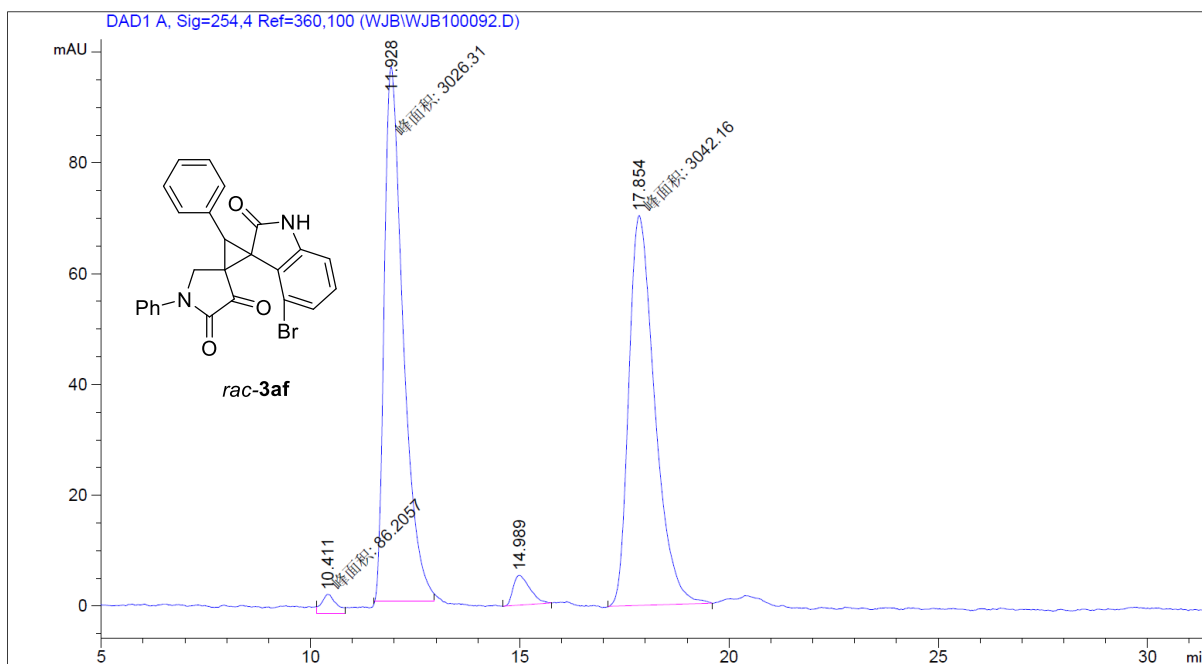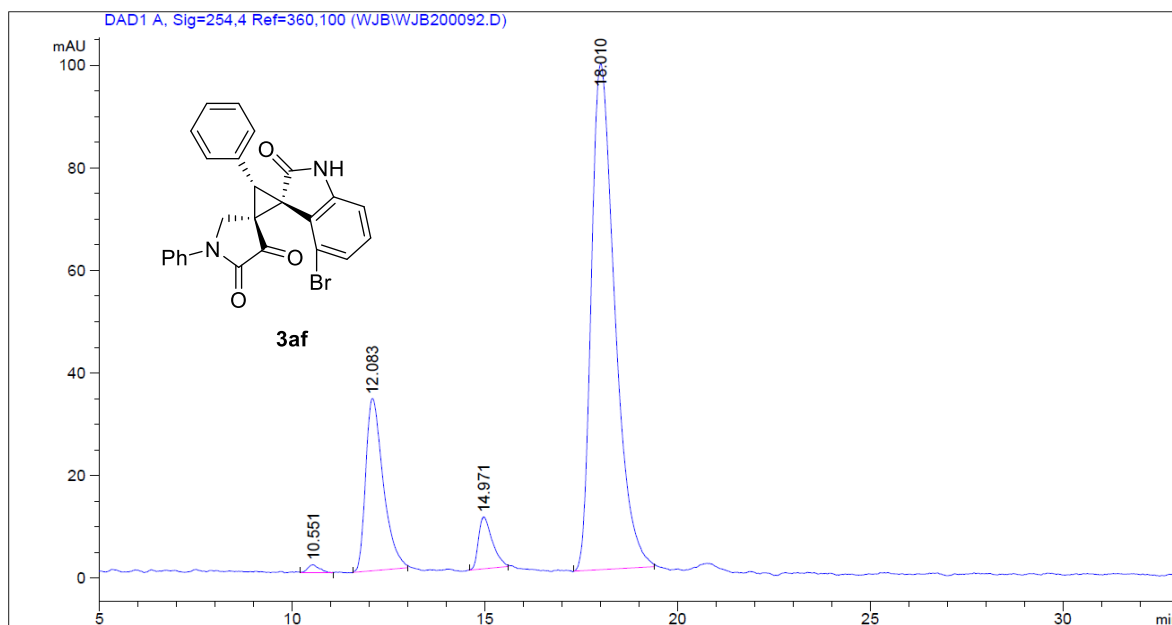



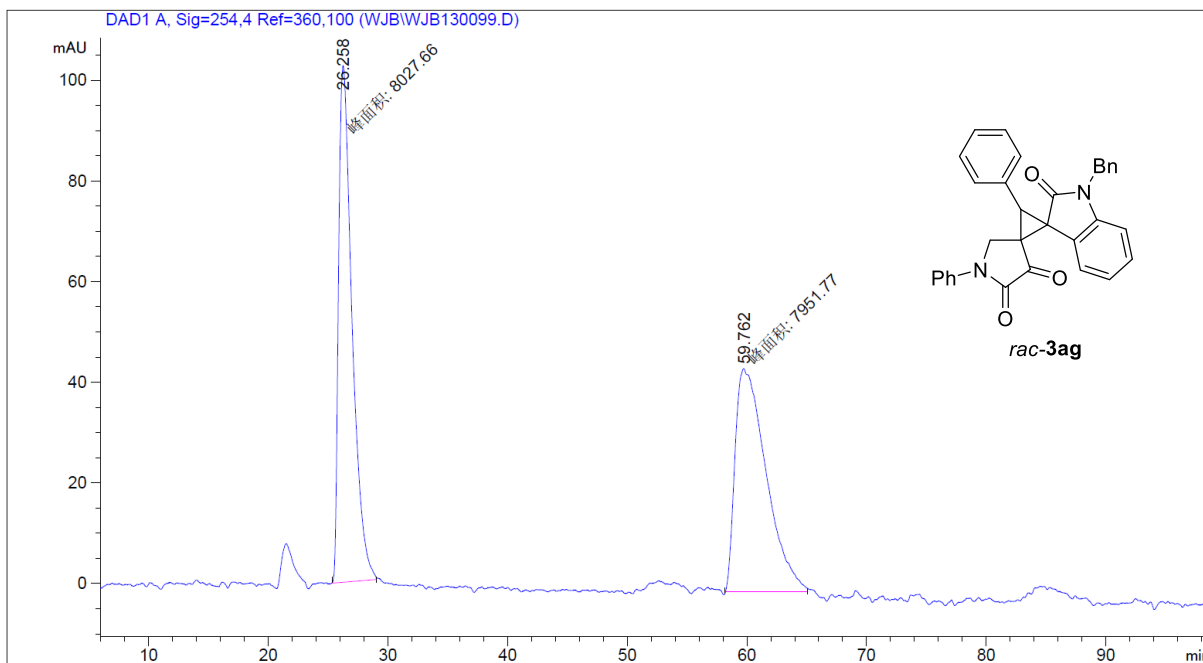

| # | Ret Time(min) | Width(min) | Area(Mau*s) | Height(mAU) | Area(%) |
|---|---------------|------------|-------------|-------------|---------|
| 1 | 26.258        | 1.3028     | 8027.66162  | 102.69595   | 50.2375 |
| 2 | 59.762        | 2.9951     | 7951.76563  | 44.24814    | 49.7625 |

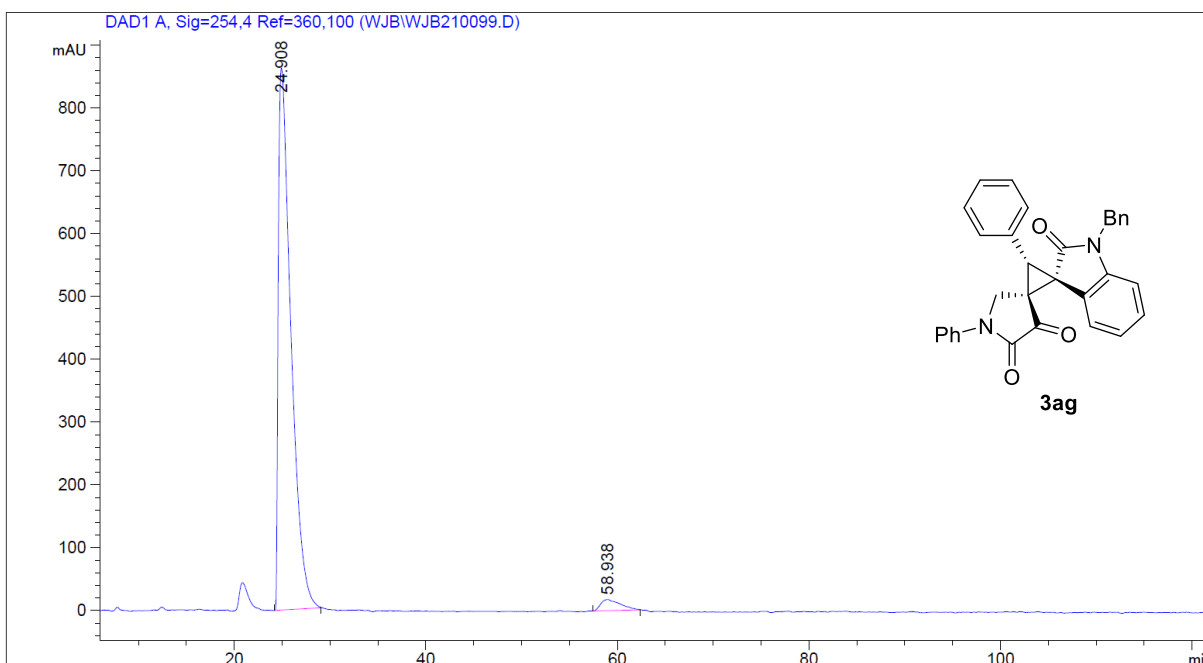

| # | Ret Time(min) | Width(min) | Area(Mau*s) | Height(mAU) | Area(%) |
|---|---------------|------------|-------------|-------------|---------|
| 1 | 24.908        | 1.1926     | 7.90282e4   | 862.83954   | 96.9164 |
| 2 | 58.938        | 1.6617     | 2514.43677  | 17.73924    | 3.0836  |

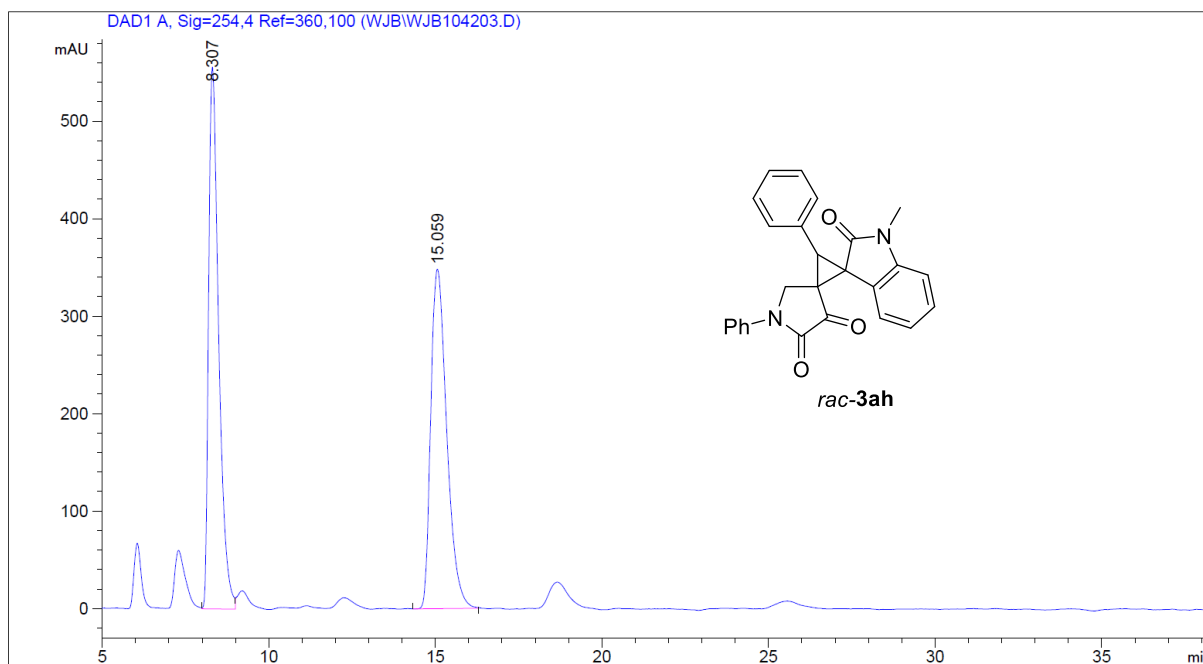

| # | Ret Time(min) | Width(min) | Area(Mau*s) | Height(mAU) | Area(%) |
|---|---------------|------------|-------------|-------------|---------|
| 1 | 8.307         | 0.3212     | 1.16899e4   | 556.13867   | 50.1681 |
| 2 | 15.059        | 0.5188     | 1.16116e4   | 348.41922   | 49.8319 |

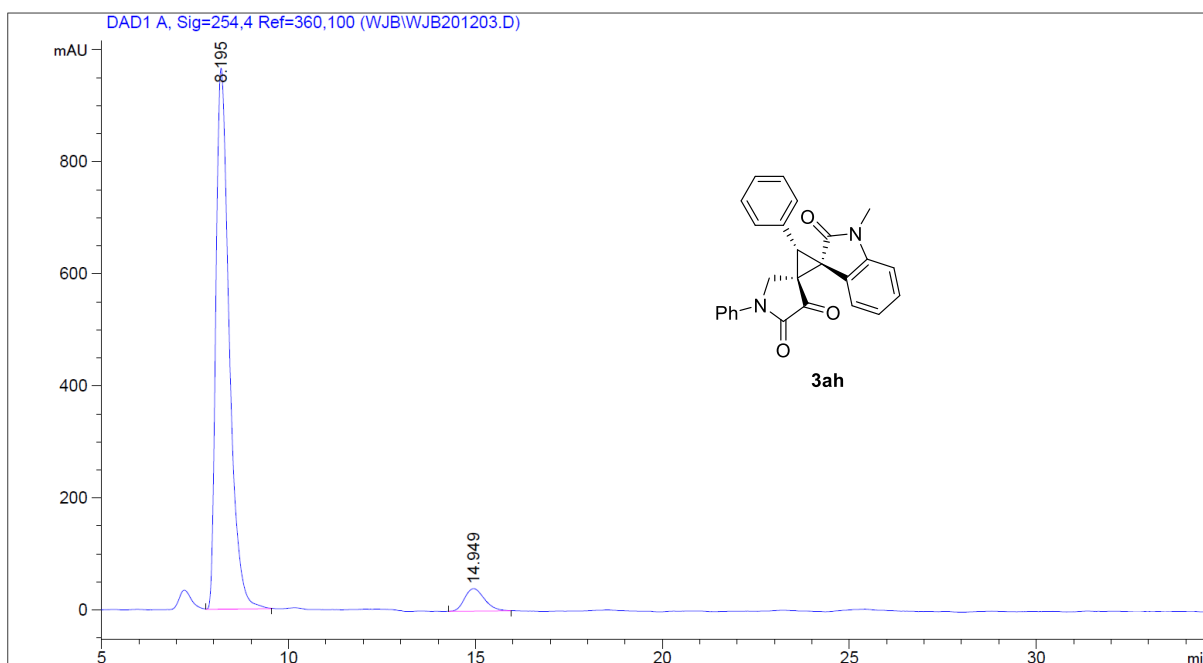

| # | Ret Time(min) | Width(min) | Area(Mau*s) | Height(mAU) | Area(%) |
|---|---------------|------------|-------------|-------------|---------|
| 1 | 8.195         | 0.3773     | 2.39438e4   | 965.73016   | 94.1814 |
| 2 | 14.949        | 0.5146     | 1479.26074  | 40.08051    | 5.8186  |

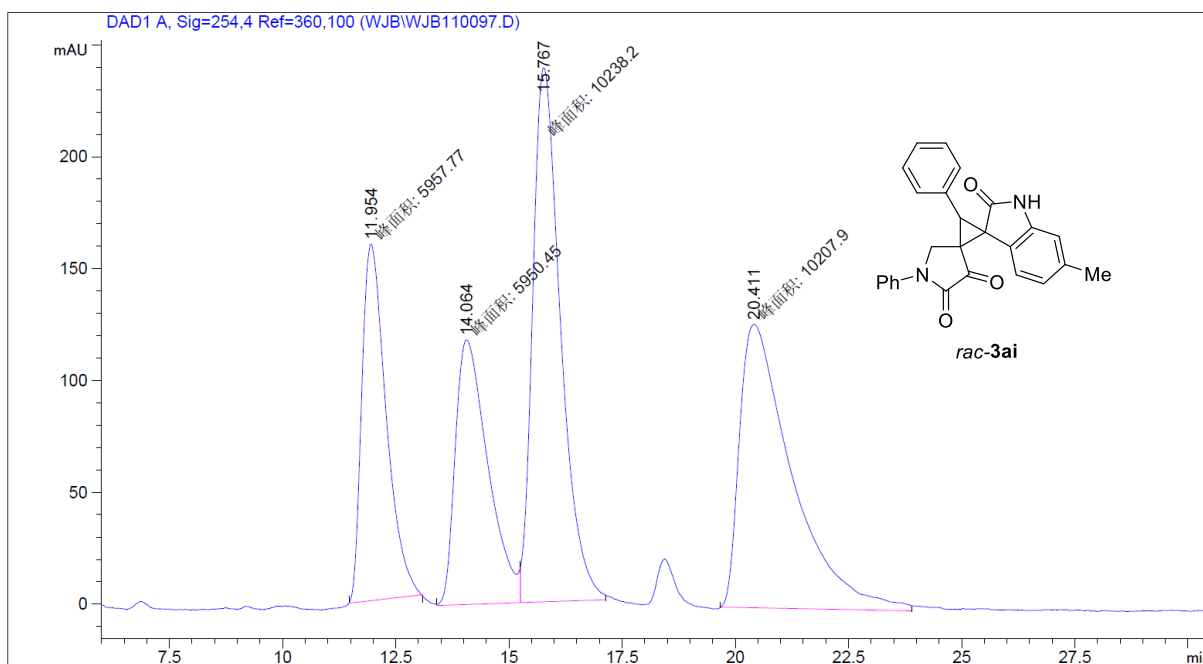

| # | Ret Time(min) | Width(min) | Area(Mau*s) | Height(mAU) | Area(%) |
|---|---------------|------------|-------------|-------------|---------|
| 1 | 11.954        | 0.6226     | 5957.76953  | 159.48012   | 18.4141 |
| 2 | 14.064        | 0.8382     | 5950.44531  | 118.31105   | 18.3915 |
| 3 | 15.767        | 0.7146     | 1.02382e4   | 238.78651   | 31.6441 |
| 4 | 20.411        | 1.3420     | 1.02079e4   | 126.77451   | 31.5503 |

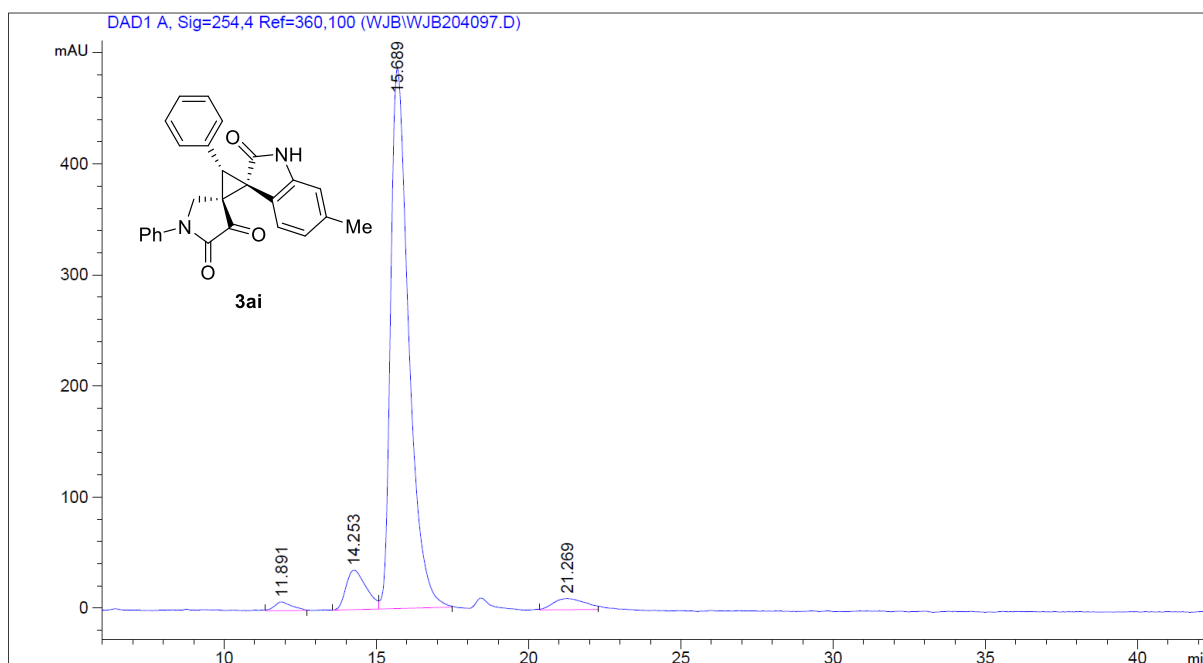

| # | Ret Time(min) | Width(min) | Area(Mau*s) | Height(mAU) | Area(%) |
|---|---------------|------------|-------------|-------------|---------|
| 1 | 11.891        | 0.4779     | 310.71732   | 7.78130     | 1.3603  |
| 2 | 14.253        | 0.5871     | 1641.55920  | 35.52750    | 7.1865  |
| 3 | 15.689        | 0.5856     | 2.01665e4   | 486.46790   | 88.2860 |
| 4 | 21.269        | 0.8431     | 723.47046   | 10.08322    | 3.1673  |

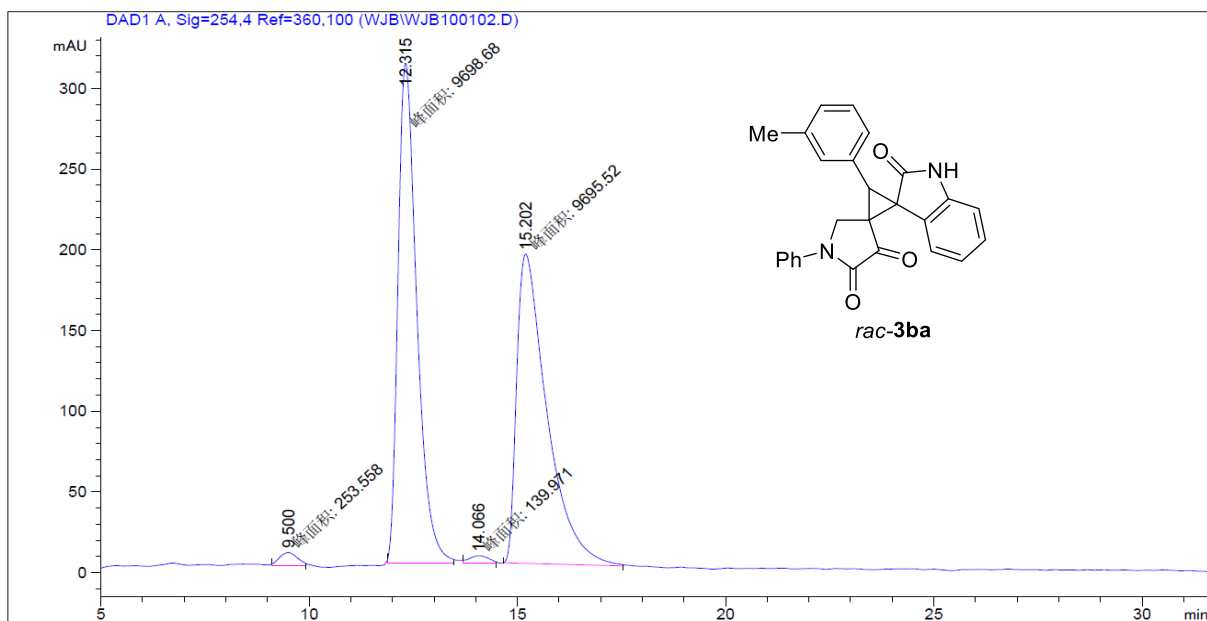

| # | Ret Time(min) | Width(min) | Area(Mau*s) | Height(mAU) | Area(%) |
|---|---------------|------------|-------------|-------------|---------|
| 1 | 9.500         | 0.5111     | 253.55803   | 8.26890     | 1.2814  |
| 2 | 12.315        | 0.5223     | 9698.67578  | 309.50089   | 49.0136 |
| 3 | 14.066        | 0.5268     | 139.97141   | 4.42847     | 0.7074  |
| 4 | 15.202        | 0.8434     | 9695.52051  | 191.59204   | 48.9976 |

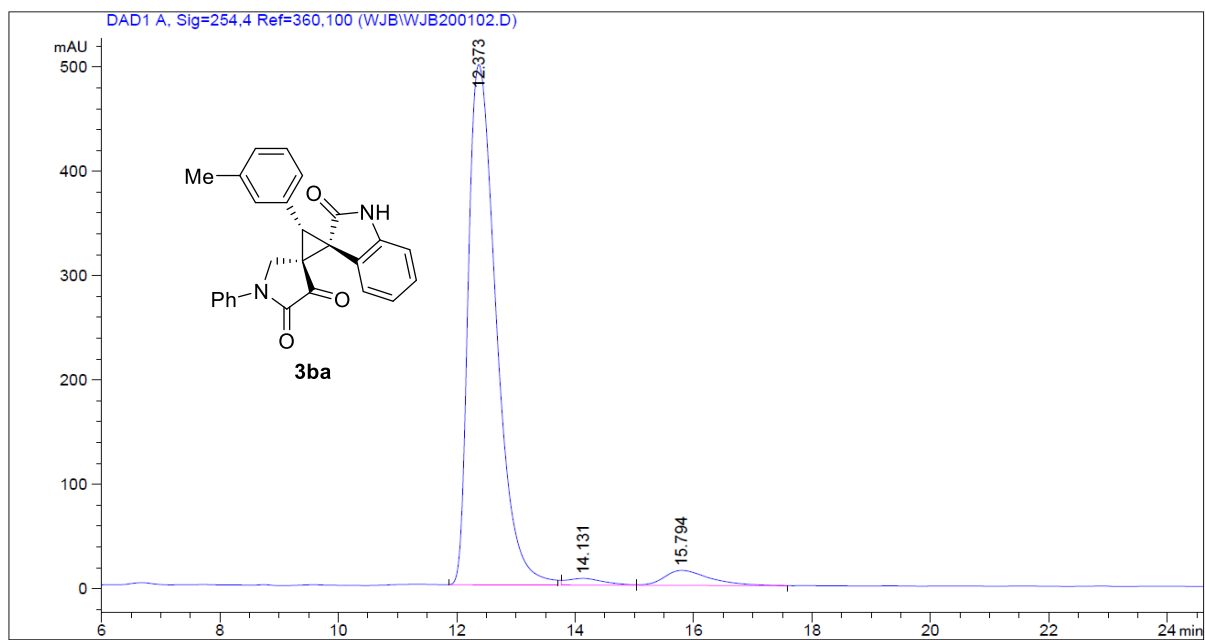

| # | Ret Time(min) | Width(min) | Area(Mau*s) | Height(mAU) | Area(%) |
|---|---------------|------------|-------------|-------------|---------|
| 1 | 12.373        | 0.5067     | 1.62701e4   | 498.53784   | 93.9008 |
| 2 | 14.131        | 0.5168     | 282.63165   | 6.53153     | 1.6312  |
| 3 | 15.794        | 0.6582     | 774.17444   | 14.377723   | 4.4680  |

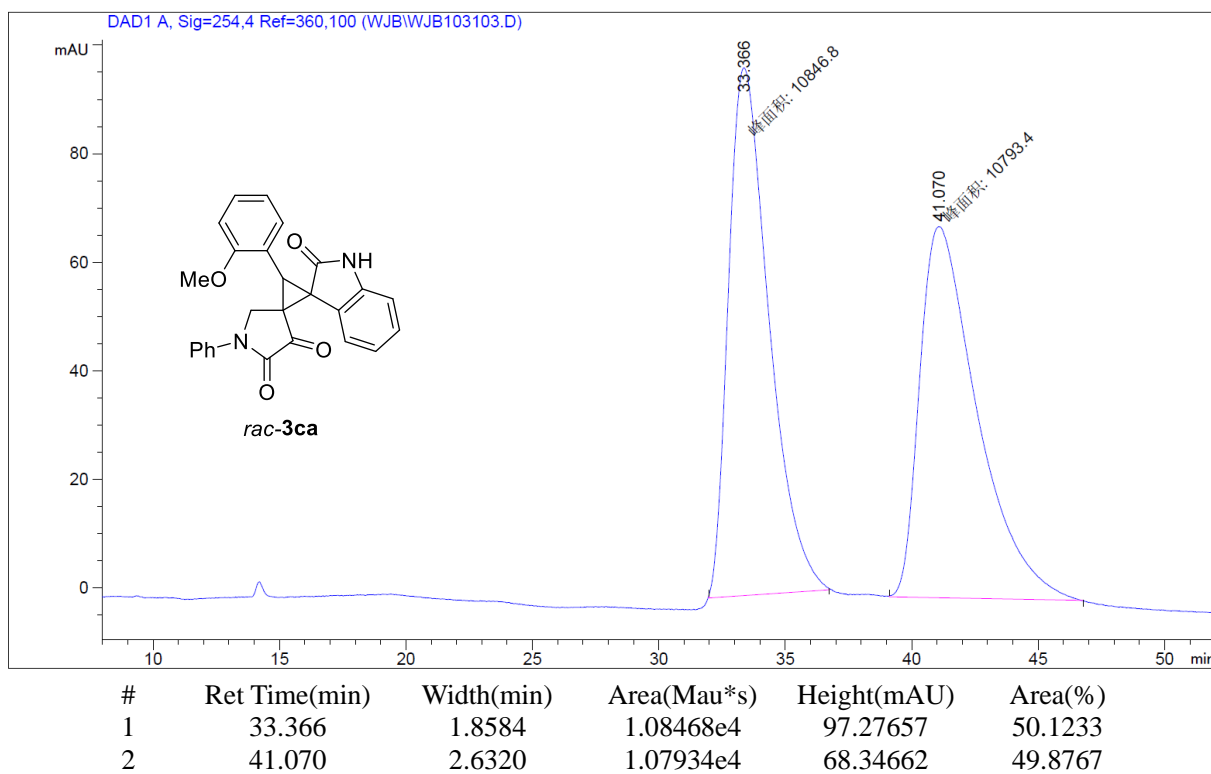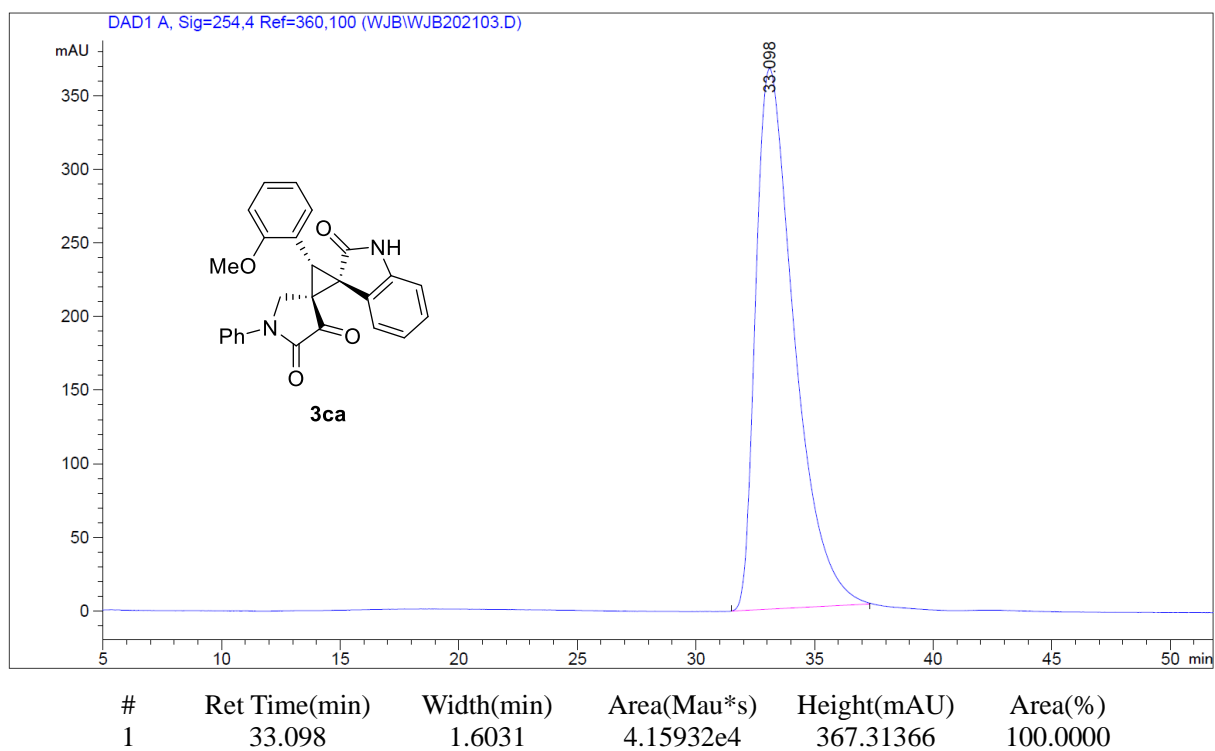

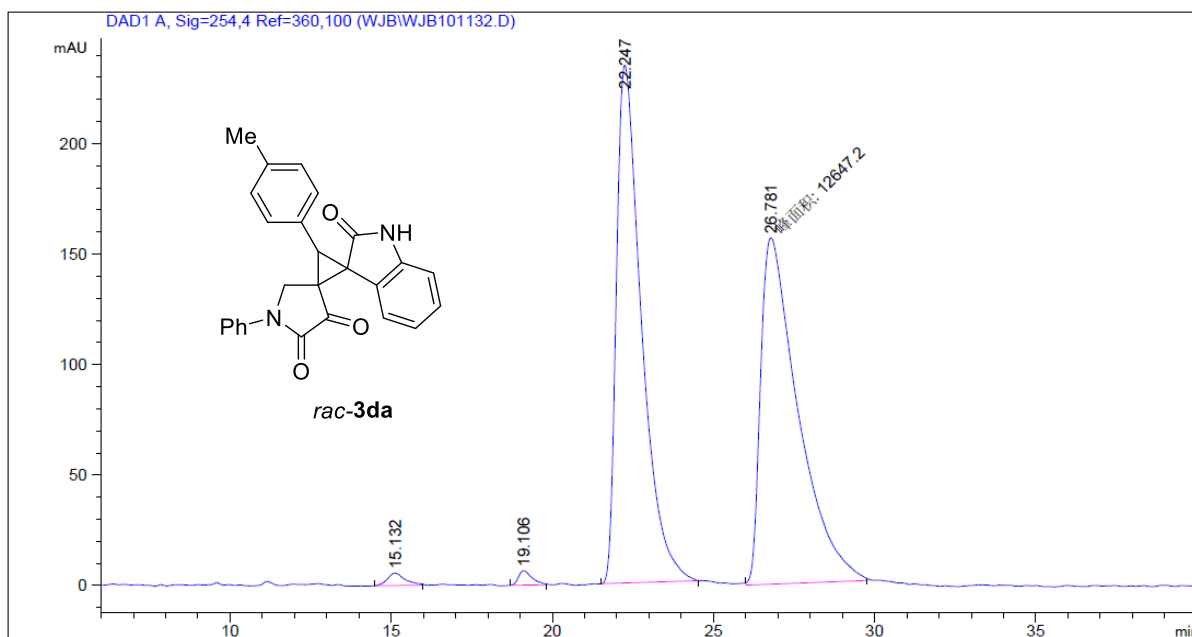

| # | Ret Time(min) | Width(min) | Area(Mau*s) | Height(mAU) | Area(%) |
|---|---------------|------------|-------------|-------------|---------|
| 1 | 15.132        | 0.4623     | 214.45787   | 5.58109     | 0.8340  |
| 2 | 19.106        | 0.4137     | 190.01068   | 6.52613     | 0.7390  |
| 3 | 22.247        | 0.7961     | 1.26617e4   | 234.42819   | 49.2416 |
| 4 | 26.781        | 1.3450     | 1.26472e4   | 156.71603   | 49.1854 |

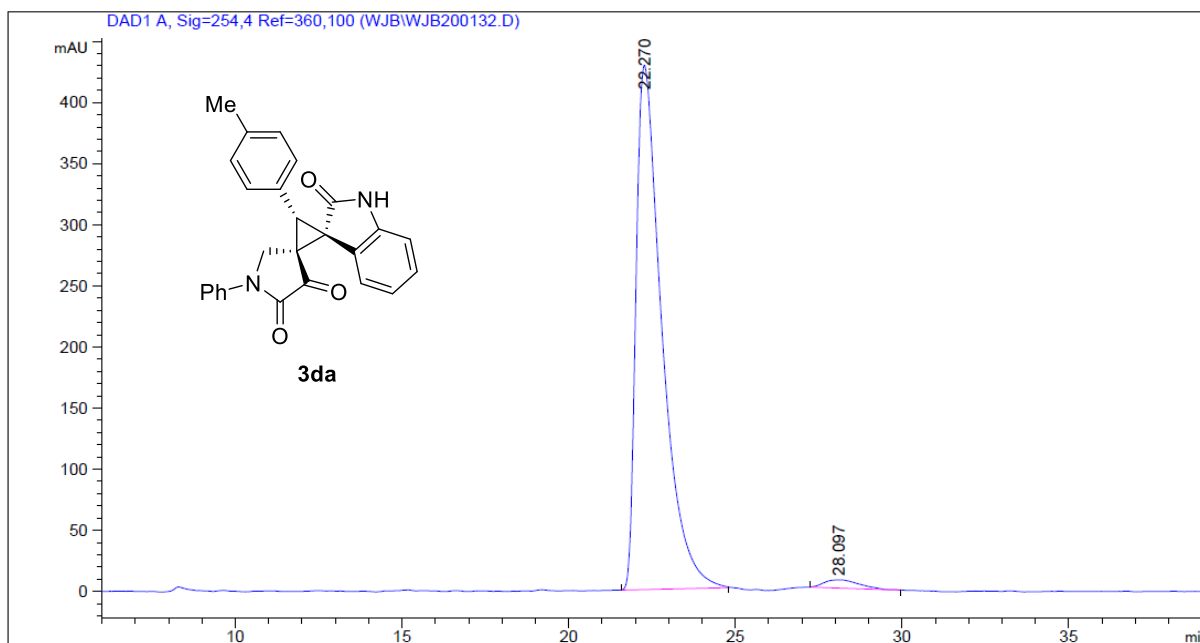

| # | Ret Time(min) | Width(min) | Area(Mau*s) | Height(mAU) | Area(%) |
|---|---------------|------------|-------------|-------------|---------|
| 1 | 22.270        | 0.7969     | 2.31223e4   | 428.95096   | 97.9014 |
| 2 | 28.097        | 0.8698     | 495.65039   | 6.74117     | 2.0986  |

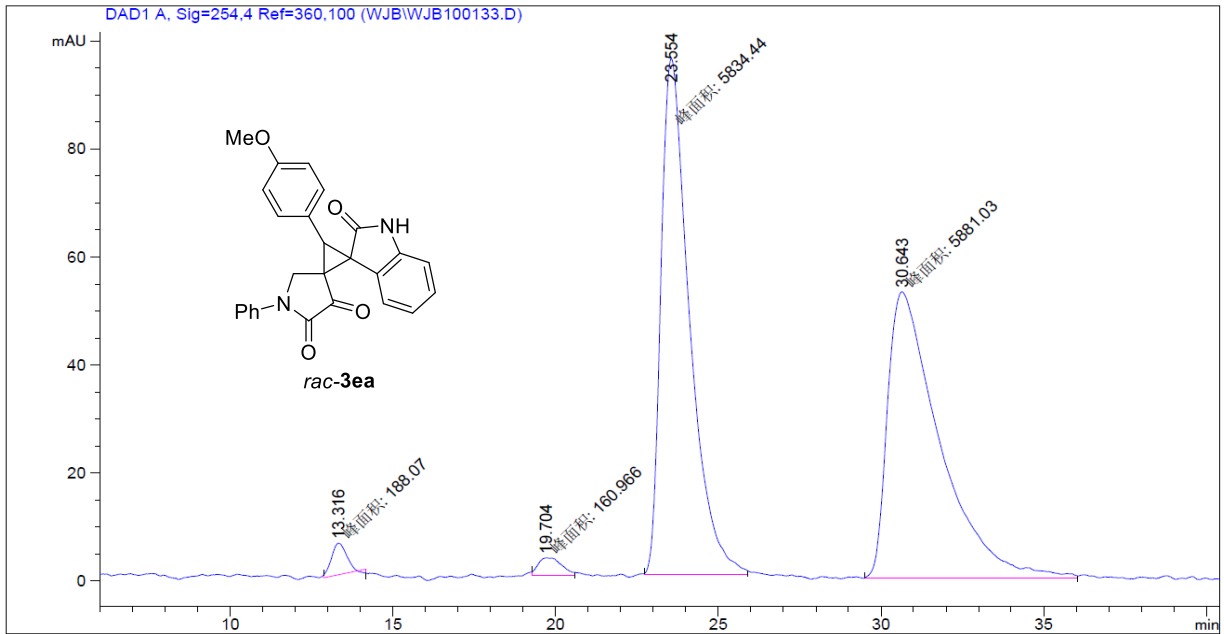

| # | Ret Time(min) | Width(min) | Area(Mau*s) | Height(mAU) | Area(%) |
|---|---------------|------------|-------------|-------------|---------|
| 1 | 13.316        | 0.5345     | 188.06975   | 5.86430     | 1.5589  |
| 2 | 19.704        | 0.8329     | 160.96613   | 3.22095     | 1.3342  |
| 3 | 23.554        | 1.0176     | 5834.44287  | 95.56062    | 48.3604 |
| 4 | 30.643        | 1.8505     | 5881.03320  | 52.96864    | 48.7465 |

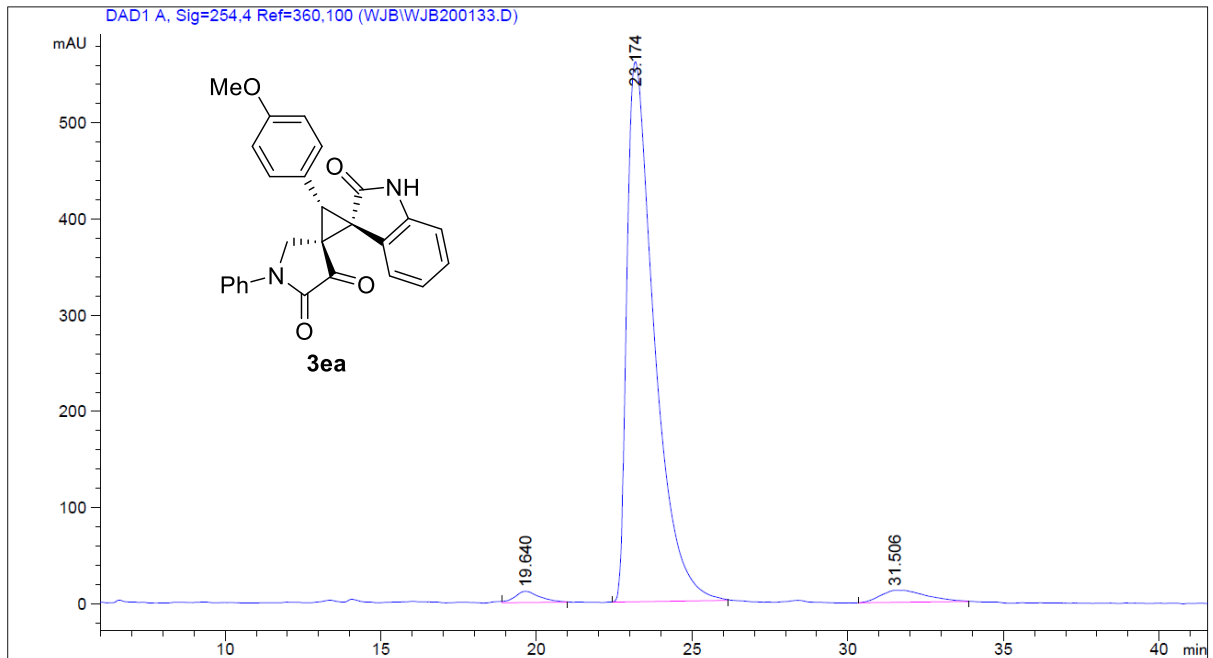

| # | Ret Time(min) | Width(min) | Area(Mau*s) | Height(mAU) | Area(%) |
|---|---------------|------------|-------------|-------------|---------|
| 1 | 19.640        | 0.6703     | 651.05811   | 11.75318    | 1.7965  |
| 2 | 23.174        | 0.8948     | 3.43175e4   | 561.65112   | 94.6931 |
| 3 | 31.506        | 1.2001     | 1272.21533  | 12.51369    | 3.5105  |

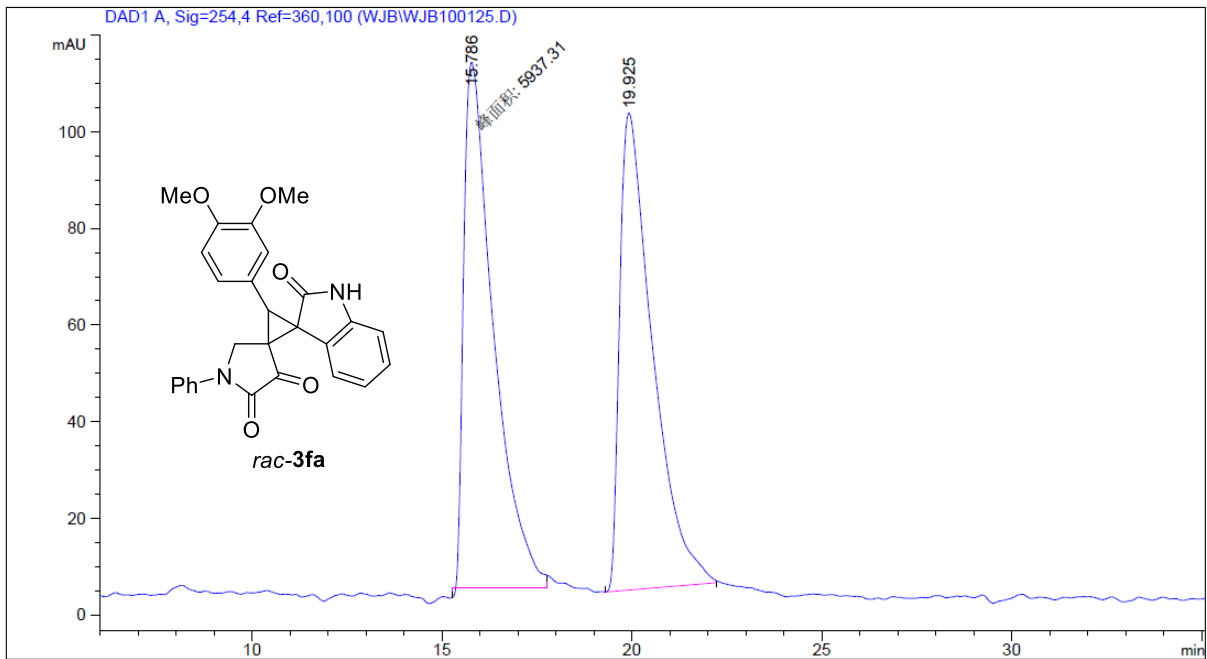

| # | Ret Time(min) | Width(min) | Area(Mau*s) | Height(mAU) | Area(%) |
|---|---------------|------------|-------------|-------------|---------|
| 1 | 15.786        | 0.9084     | 5937.30908  | 108.92759   | 49.9670 |
| 2 | 19.925        | 0.8182     | 5945.16016  | 98.77988    | 50.0330 |

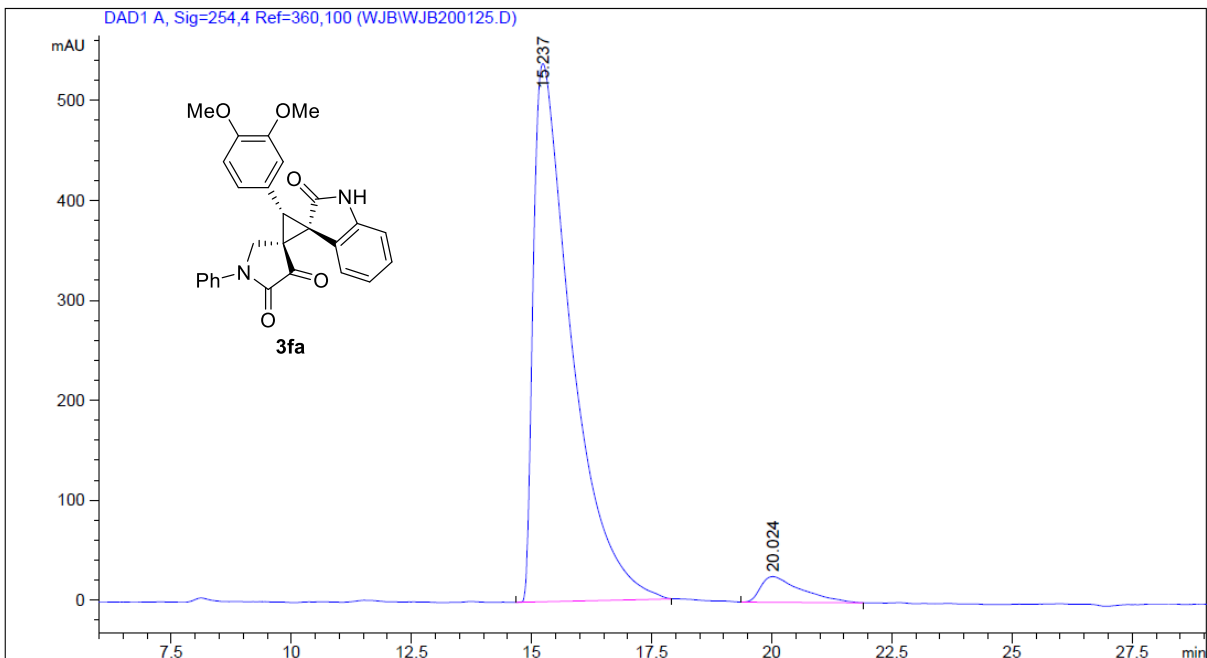

| # | Ret Time(min) | Width(min) | Area(Mau*s) | Height(mAU) | Area(%) |
|---|---------------|------------|-------------|-------------|---------|
| 1 | 15.237        | 0.7710     | 2.97728e4   | 538.52228   | 95.1430 |
| 2 | 20.024        | 0.7750     | 1519.88843  | 25.73763    | 4.8570  |



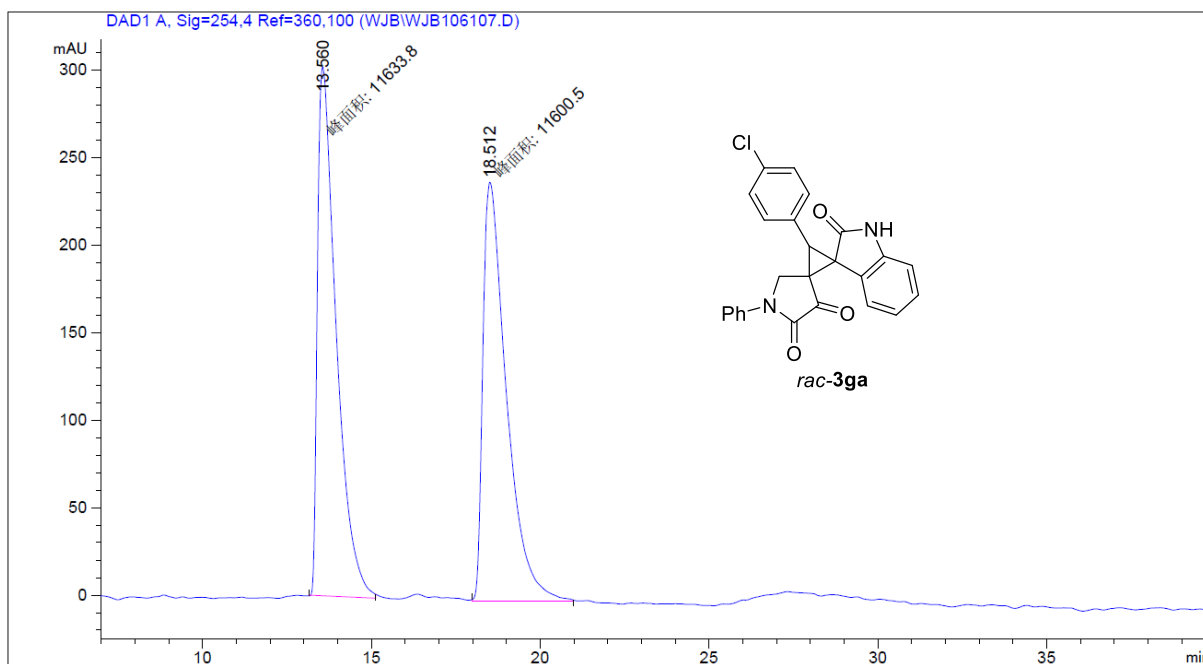

| # | Ret Time(min) | Width(min) | Area(Mau*s) | Height(mAU) | Area(%) |
|---|---------------|------------|-------------|-------------|---------|
| 1 | 13.560        | 0.6422     | 1.16338e4   | 301.93530   | 50.0715 |
| 2 | 18.512        | 0.8083     | 1.16005e4   | 239.20134   | 49.9285 |

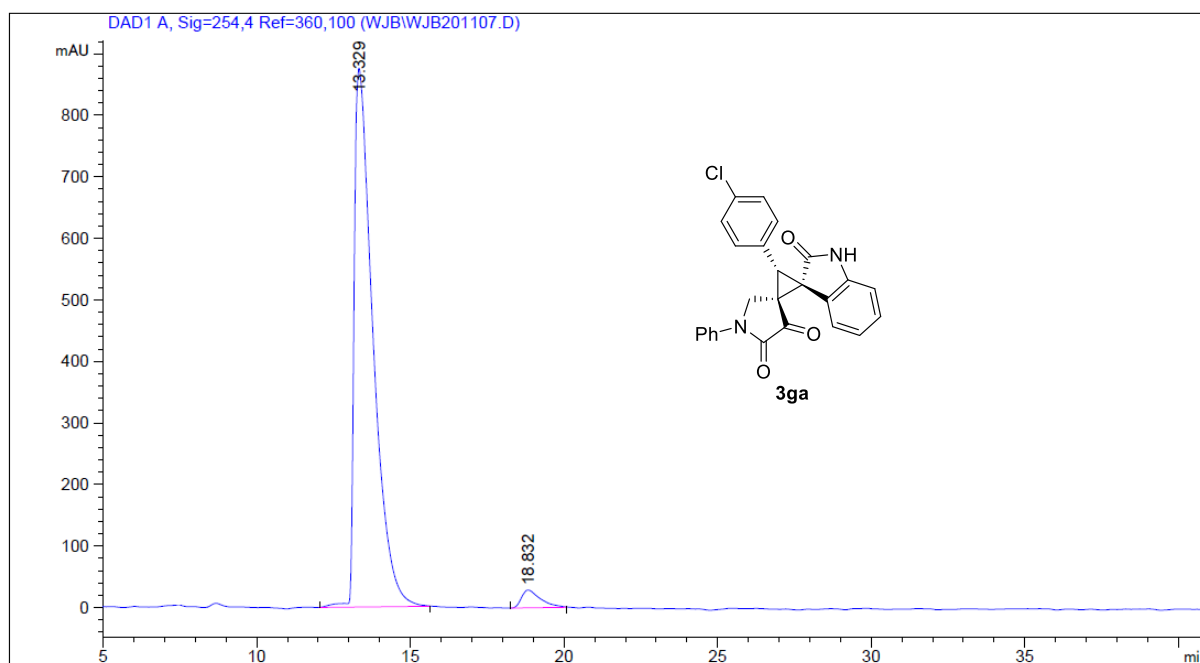

| # | Ret Time(min) | Width(min) | Area(Mau*s) | Height(mAU) | Area(%) |
|---|---------------|------------|-------------|-------------|---------|
| 1 | 13.329        | 0.6247     | 3.71313e4   | 875.75018   | 96.7577 |
| 2 | 18.832        | 0.5983     | 1244.25024  | 28.90086    | 3.2423  |

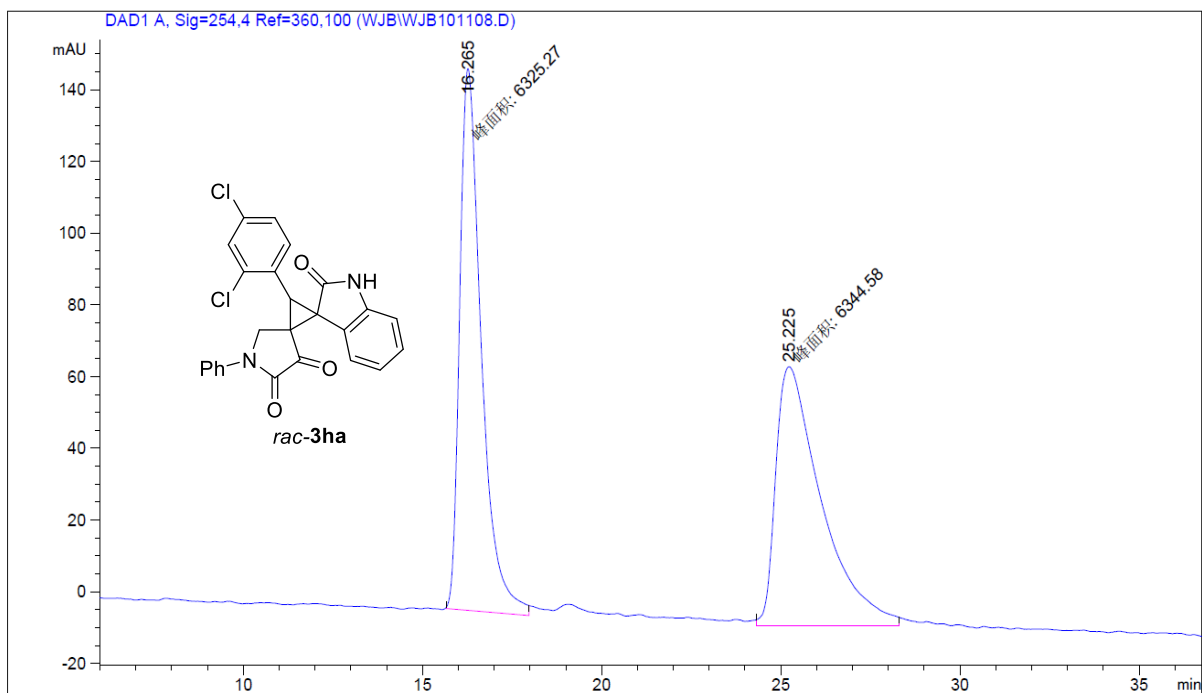

| # | Ret Time(min) | Width(min) | Area(Mau*s) | Height(mAU) | Area(%) |
|---|---------------|------------|-------------|-------------|---------|
| 1 | 16.265        | 0.6978     | 6325.27393  | 151.07901   | 49.9238 |
| 2 | 25.225        | 1.4669     | 6344.57910  | 72.08625    | 50.0762 |

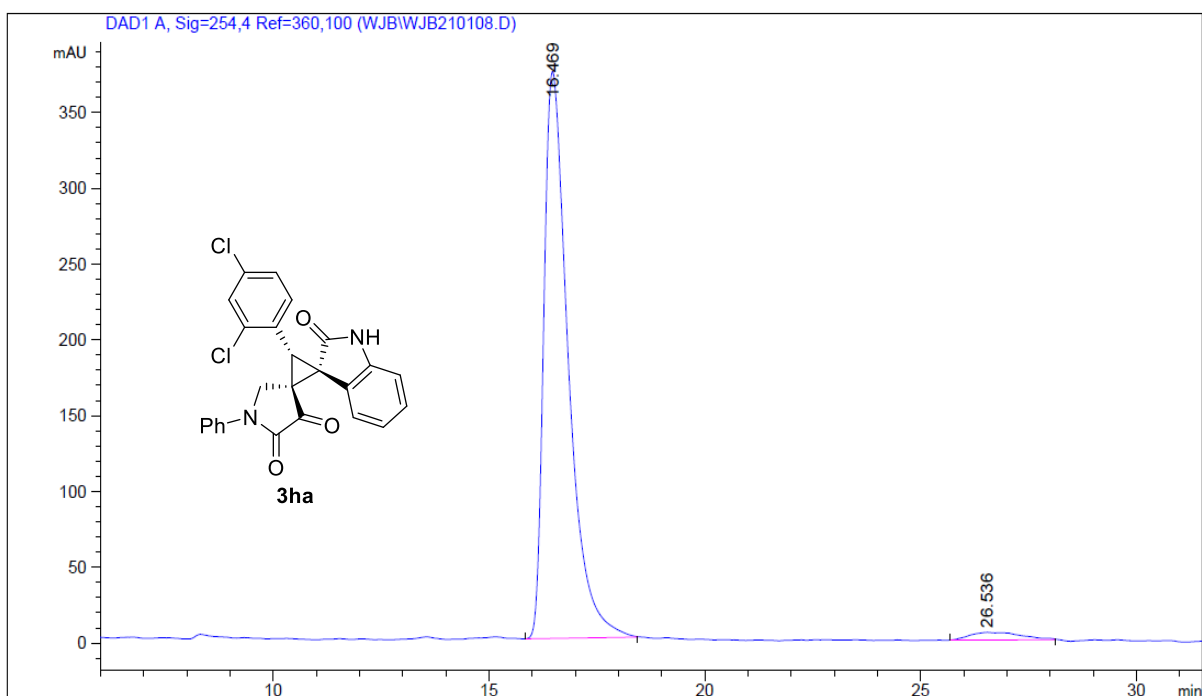

| # | Ret Time(min) | Width(min) | Area(Mau*s) | Height(mAU) | Area(%) |
|---|---------------|------------|-------------|-------------|---------|
| 1 | 16.469        | 0.5907     | 1.47036e4   | 374.01151   | 97.2248 |
| 2 | 26.536        | 0.9699     | 419.69995   | 5.10112     | 2.7752  |

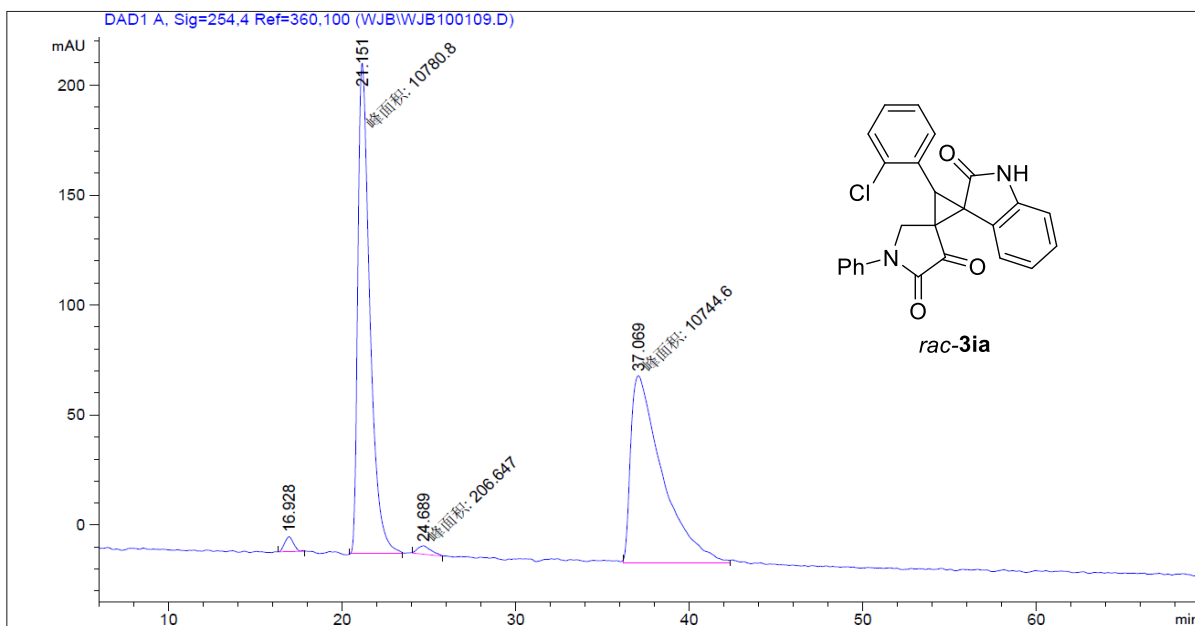

| # | Ret Time(min) | Width(min) | Area(Mau*s) | Height(mAU) | Area(%) |
|---|---------------|------------|-------------|-------------|---------|
| 1 | 16.928        | 0.4534     | 240.29655   | 6.71694     | 1.0936  |
| 2 | 21.151        | 0.8060     | 1.107808e4  | 222.92033   | 49.0654 |
| 3 | 24.689        | 0.8976     | 206.64734   | 3.83692     | 0.9405  |
| 4 | 37.069        | 2.1034     | 1.07446e4   | 85.13586    | 48.9004 |

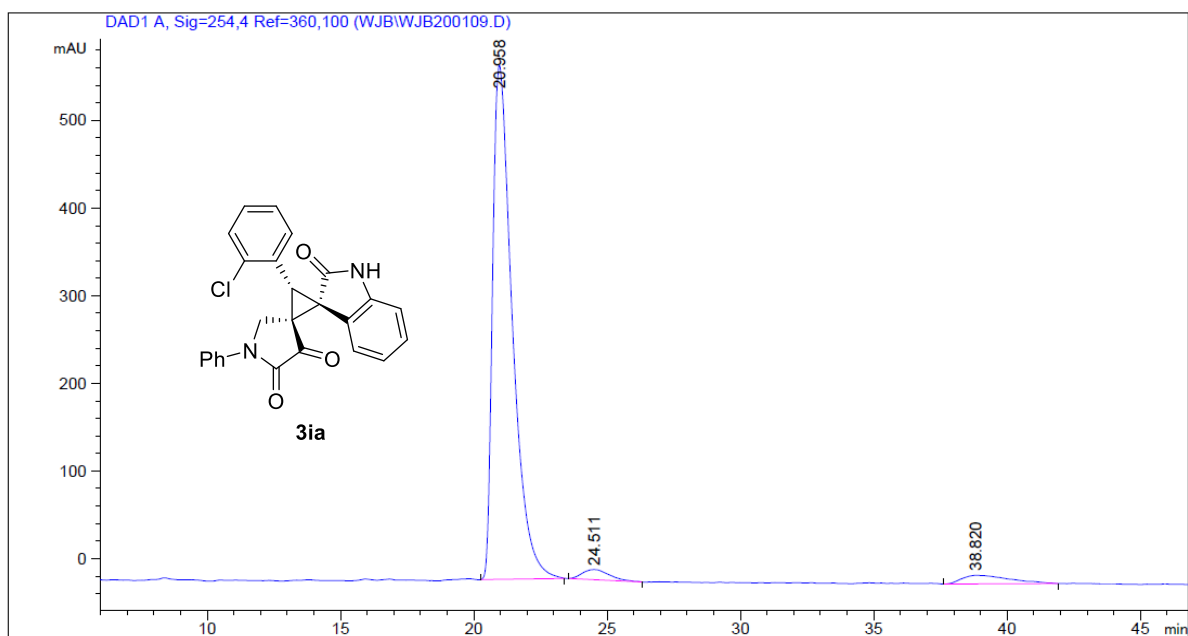

| # | Ret Time(min) | Width(min) | Area(Mau*s) | Height(mAU) | Area(%) |
|---|---------------|------------|-------------|-------------|---------|
| 1 | 20.958        | 0.7740     | 3.00591e4   | 586.47632   | 93.6700 |
| 2 | 24.511        | 0.8239     | 810.36383   | 11.64394    | 2.5252  |
| 3 | 38.820        | 1.4477     | 1220.95837  | 9.96314     | 3.8047  |

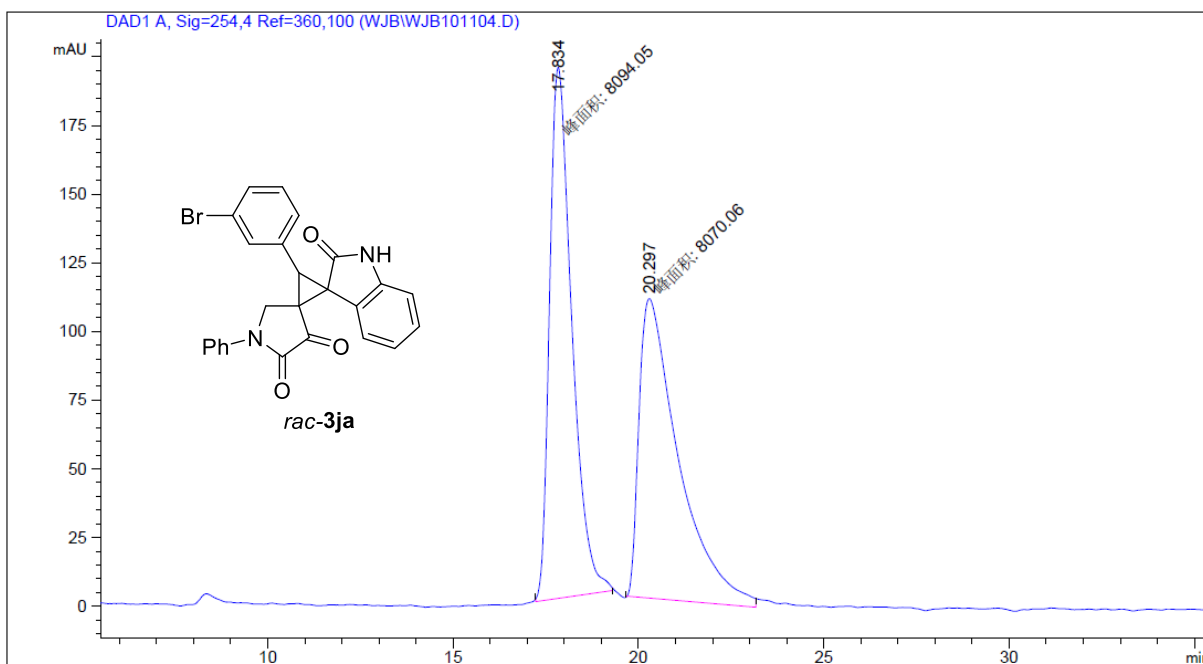

| # | Ret Time(min) | Width(min) | Area(Mau*s) | Height(mAU) | Area(%) |
|---|---------------|------------|-------------|-------------|---------|
| 1 | 17.834        | 0.6977     | 8094.05078  | 193.36087   | 50.0742 |
| 2 | 20.297        | 1.2337     | 8070.05615  | 109.02421   | 49.9258 |

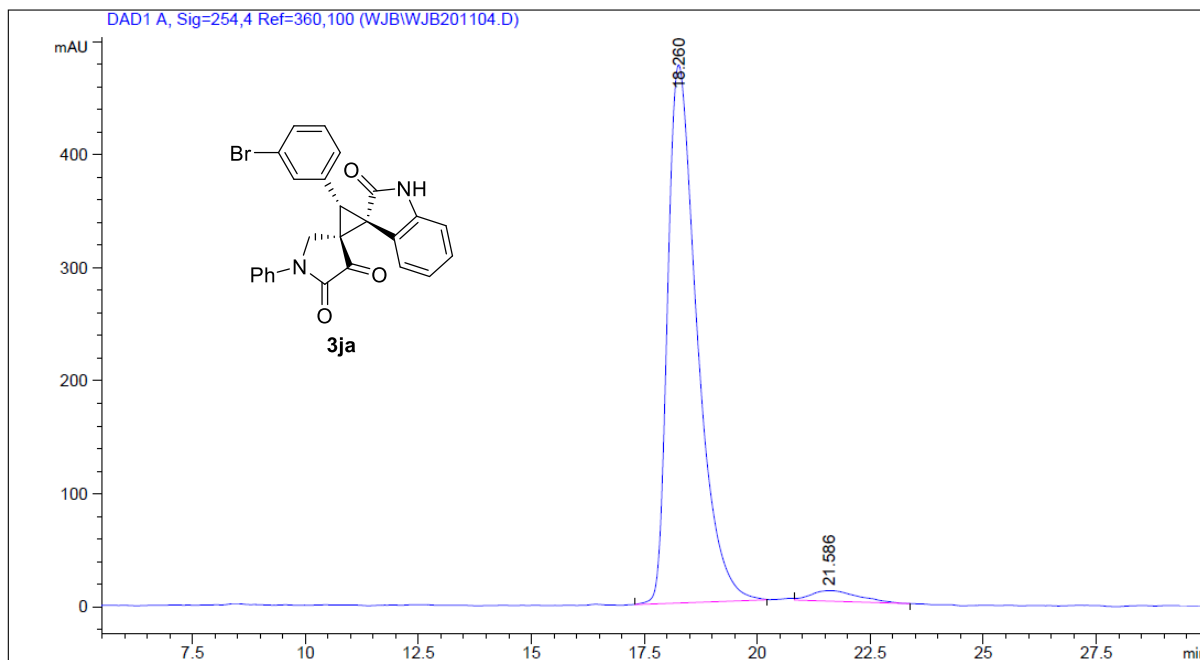

| # | Ret Time(min) | Width(min) | Area(Mau*s) | Height(mAU) | Area(%) |
|---|---------------|------------|-------------|-------------|---------|
| 1 | 18.260        | 0.6816     | 2.15397e4   | 476.33276   | 96.9515 |
| 2 | 21.586        | 0.8566     | 677.27881   | 9.33306     | 3.0485  |

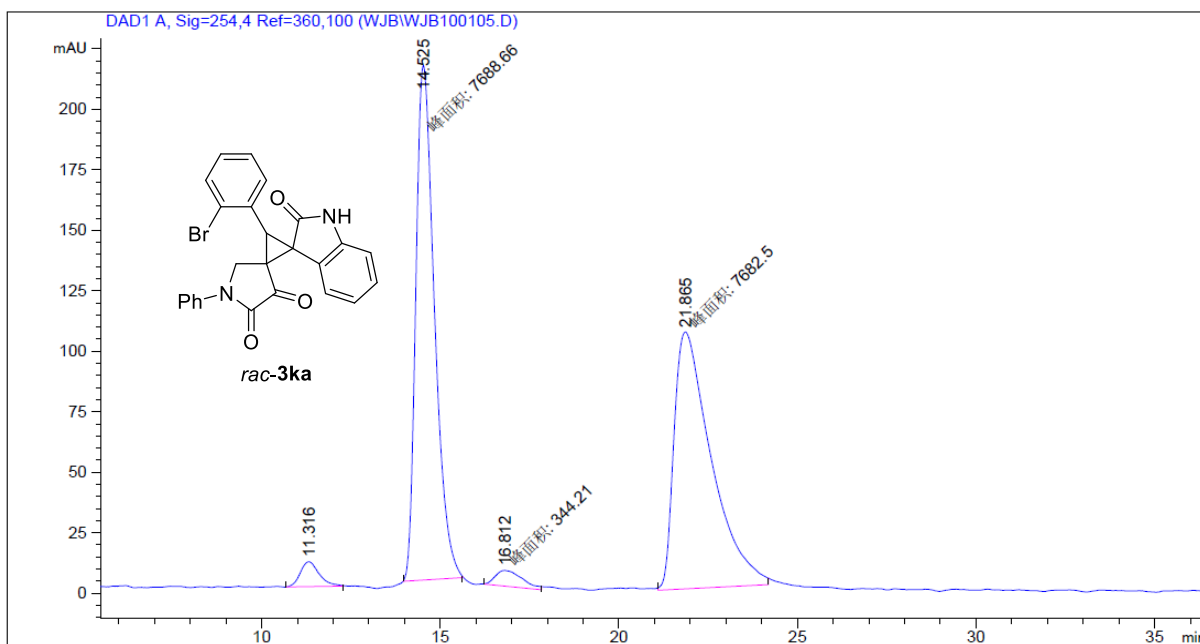

| # | Ret Time(min) | Width(min) | Area(Mau*s) | Height(mAU) | Area(%) |
|---|---------------|------------|-------------|-------------|---------|
| 1 | 11.316        | 0.4469     | 378.20505   | 10.28721    | 2.3500  |
| 2 | 14.525        | 0.6026     | 7688.66357  | 212.66362   | 47.7747 |
| 3 | 16.812        | 0.8756     | 344.20959   | 6.55153     | 2.1388  |
| 4 | 21.865        | 1.2061     | 7682.50195  | 106.16322   | 47.7364 |

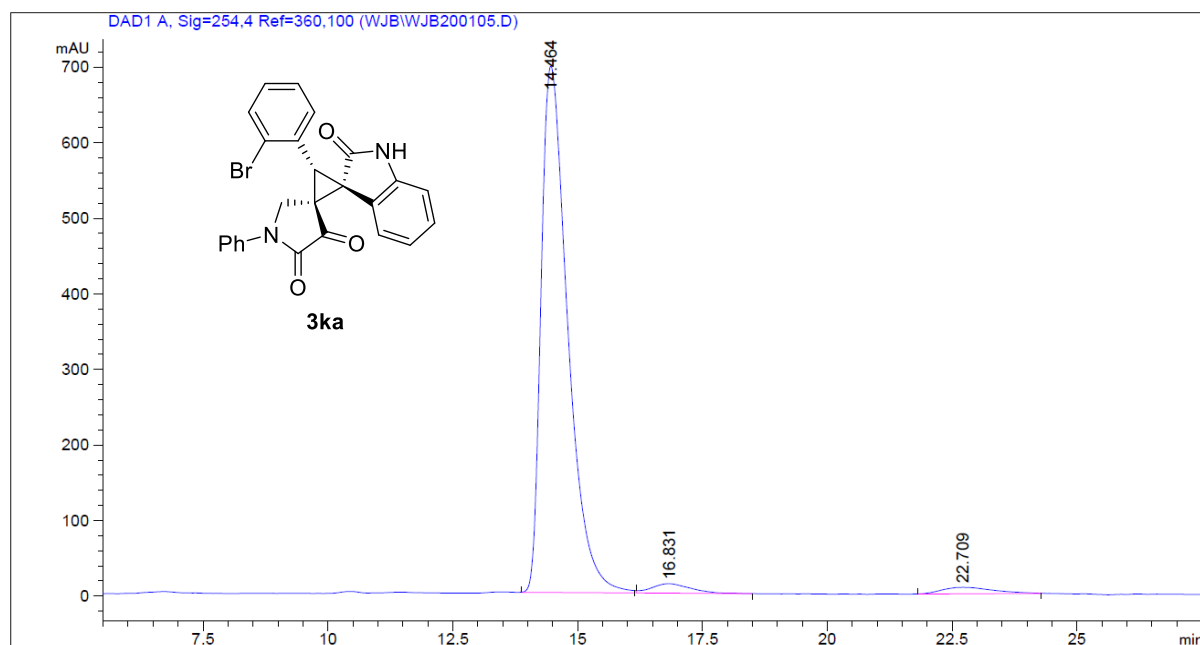

| # | Ret Time(min) | Width(min) | Area(Mau*s) | Height(mAU) | Area(%) |
|---|---------------|------------|-------------|-------------|---------|
| 1 | 14.464        | 0.5616     | 2.57650e4   | 696.50659   | 95.1855 |
| 2 | 16.831        | 0.6734     | 688.44202   | 12.64106    | 2.5434  |
| 3 | 22.709        | 0.8509     | 614.74603   | 8.52860     | 2.2711  |

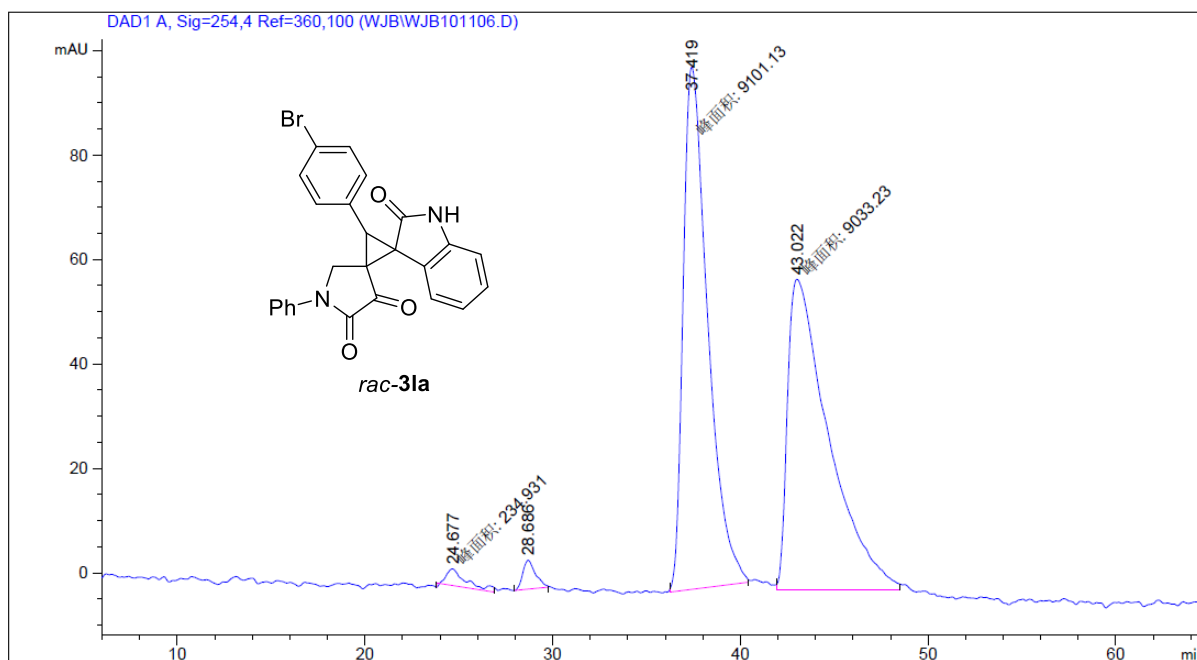

| # | Ret Time(min) | Width(min) | Area(Mau*s) | Height(mAU) | Area(%) |
|---|---------------|------------|-------------|-------------|---------|
| 1 | 24.677        | 1.2245     | 234.93140   | 3.19771     | 1.2611  |
| 2 | 28.686        | 0.5568     | 259.44336   | 5.57646     | 1.3927  |
| 3 | 37.419        | 1.5157     | 9101.13086  | 100.07813   | 48.8553 |
| 4 | 43.022        | 2.5326     | 9033.22852  | 59.44736    | 48.4908 |

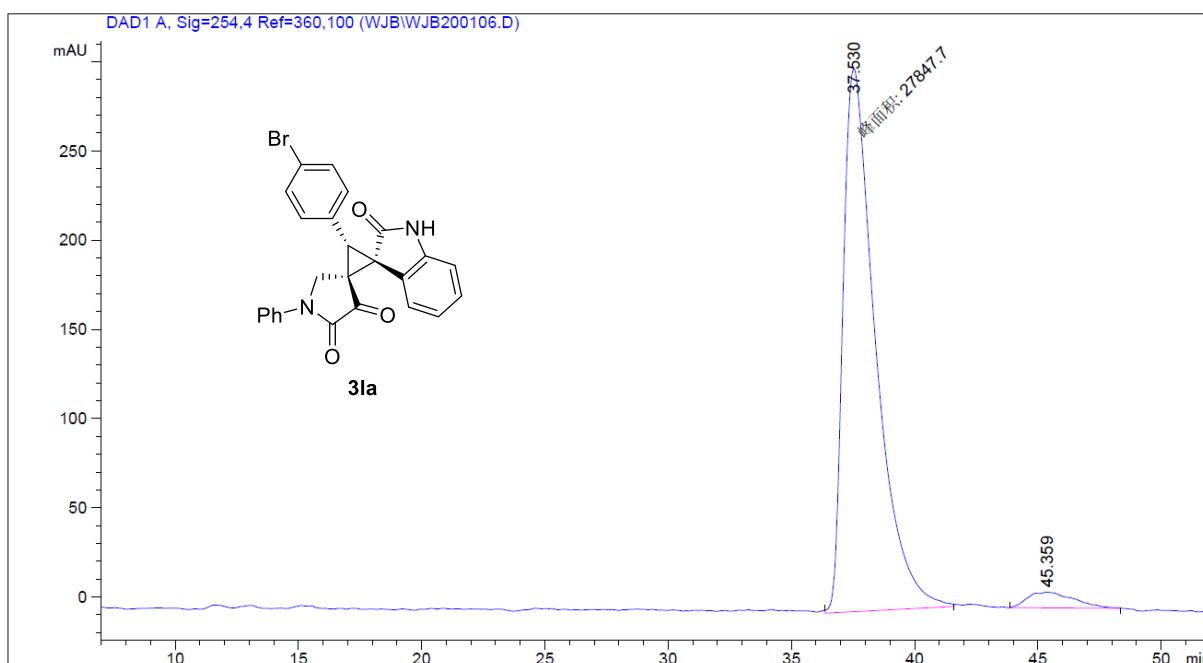

| # | Ret Time(min) | Width(min) | Area(Mau*s) | Height(mAU) | Area(%) |
|---|---------------|------------|-------------|-------------|---------|
| 1 | 37.530        | 1.5257     | 2.78477e4   | 304.20969   | 96.0642 |
| 2 | 45.359        | 1.5299     | 1140.92664  | 8.78059     | 3.9358  |

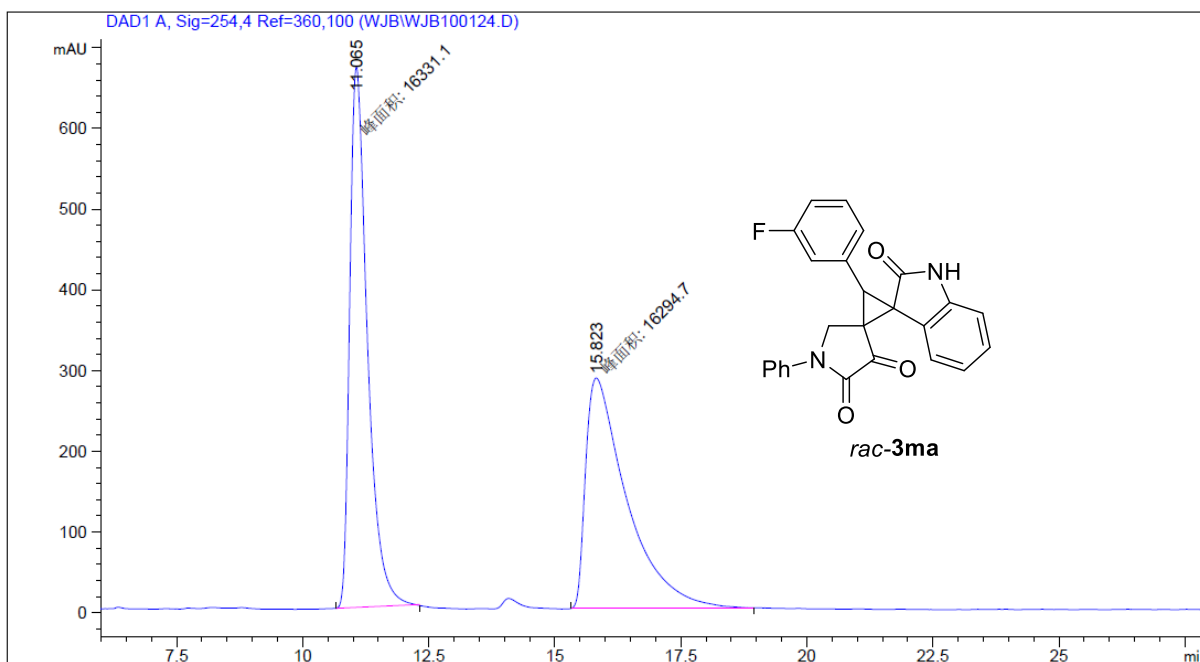

| # | Ret Time(min) | Width(min) | Area(Mau*s) | Height(mAU) | Area(%) |
|---|---------------|------------|-------------|-------------|---------|
| 1 | 11.065        | 0.4064     | 1.63311e4   | 669.75769   | 50.0558 |
| 2 | 15.823        | 0.9505     | 1.62947e4   | 285.70963   | 49.9442 |

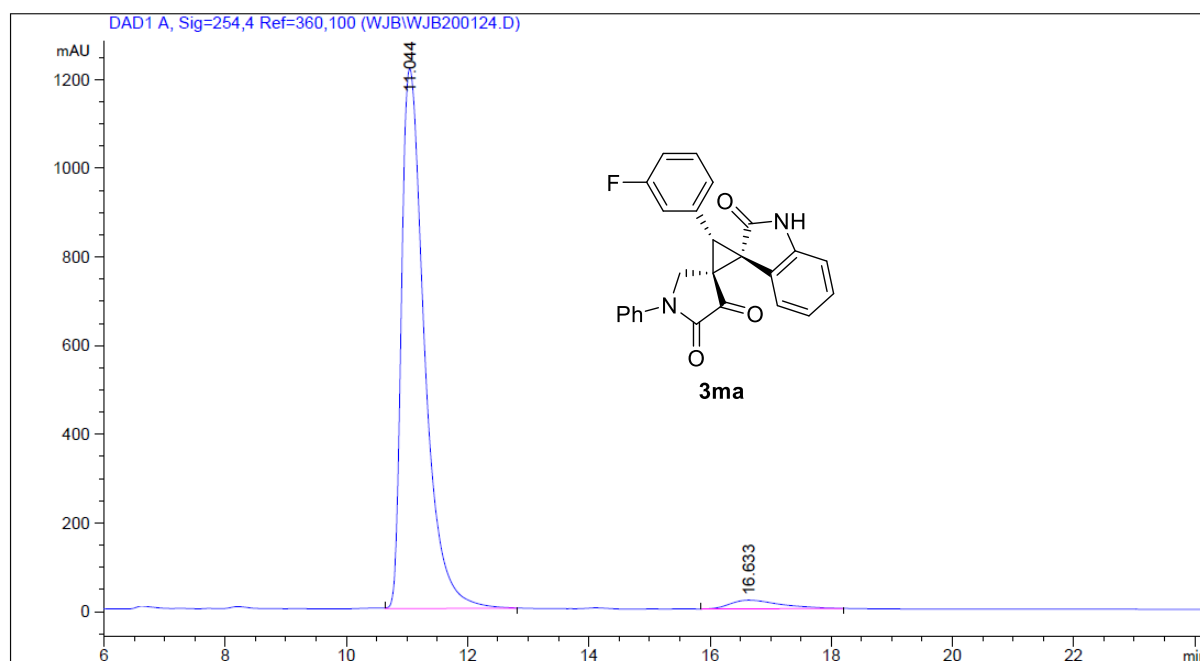

| # | Ret Time(min) | Width(min) | Area(Mau*s) | Height(mAU) | Area(%) |
|---|---------------|------------|-------------|-------------|---------|
| 1 | 11.044        | 0.3993     | 3.20773e4   | 1217.95740  | 96.6204 |
| 2 | 16.633        | 0.7453     | 1121.99243  | 19.44107    | 3.3796  |

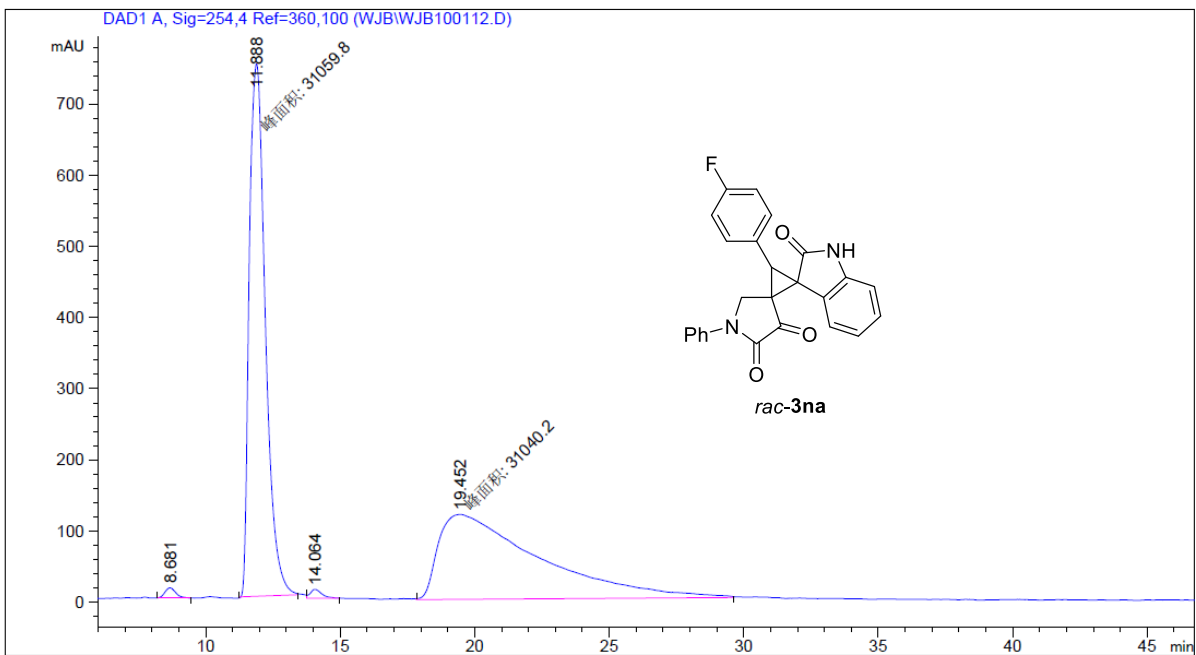

| # | Ret Time(min) | Width(min) | Area(Mau*s) | Height(mAU) | Area(%) |
|---|---------------|------------|-------------|-------------|---------|
| 1 | 8.681         | 0.4055     | 405.31360   | 14.52948    | 0.6446  |
| 2 | 11.888        | 0.6916     | 3.10598e4   | 748.53577   | 49.3979 |
| 3 | 14.064        | 0.4053     | 371.46979   | 12.47728    | 0.5908  |
| 4 | 19.452        | 4.3283     | 3.10402e4   | 119.52375   | 49.3667 |

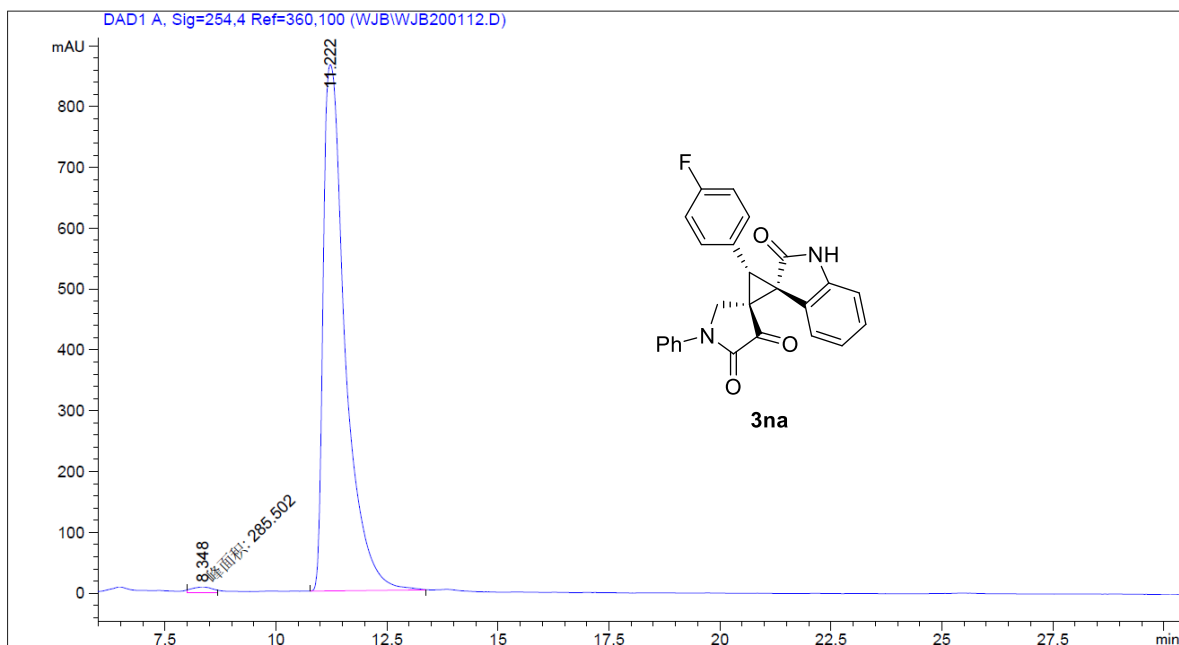

| # | Ret Time(min) | Width(min) | Area(Mau*s) | Height(mAU) | Area(%) |
|---|---------------|------------|-------------|-------------|---------|
| 1 | 8.348         | 0.5298     | 285.50159   | 8.98092     | 0.9487  |
| 2 | 11.222        | 0.5181     | 2.98097e4   | 864.88324   | 99.0513 |



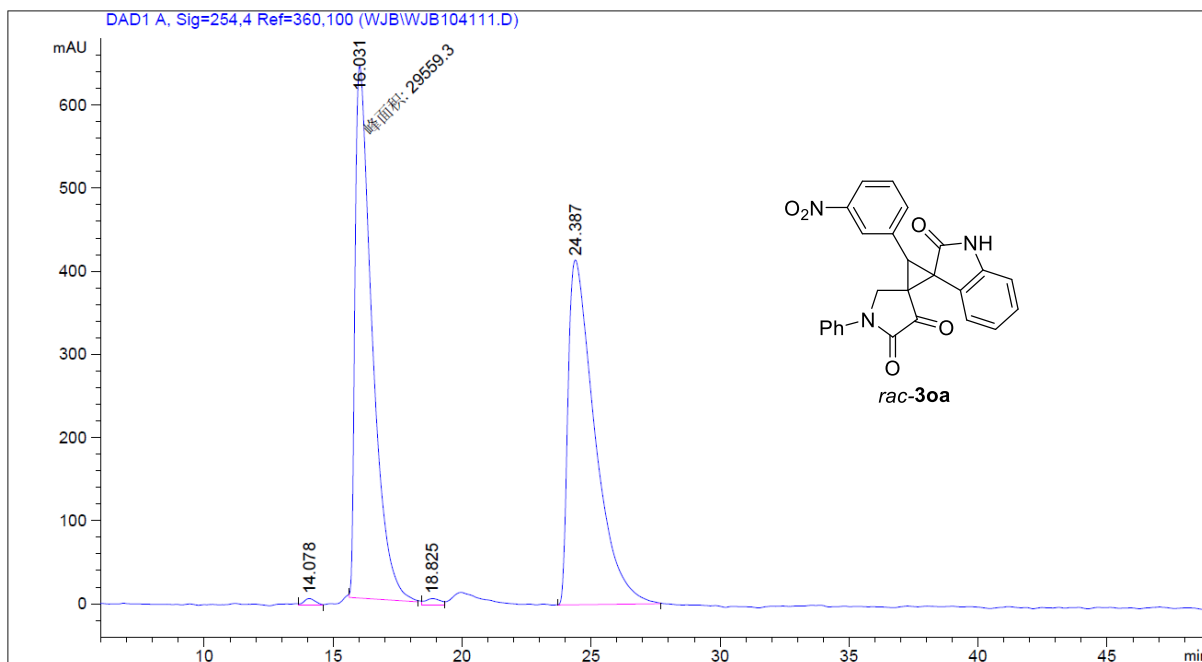

| # | Ret Time(min) | Width(min) | Area(Mau*s) | Height(mAU) | Area(%) |
|---|---------------|------------|-------------|-------------|---------|
| 1 | 14.078        | 0.4271     | 261.86365   | 8.27660     | 0.4364  |
| 2 | 16.031        | 0.7695     | 2.95593e4   | 640.23151   | 49.2573 |
| 3 | 18.825        | 0.4999     | 326.87766   | 7.78484     | 0.5447  |
| 4 | 24.387        | 0.9980     | 2.98619e4   | 414.72940   | 49.7616 |

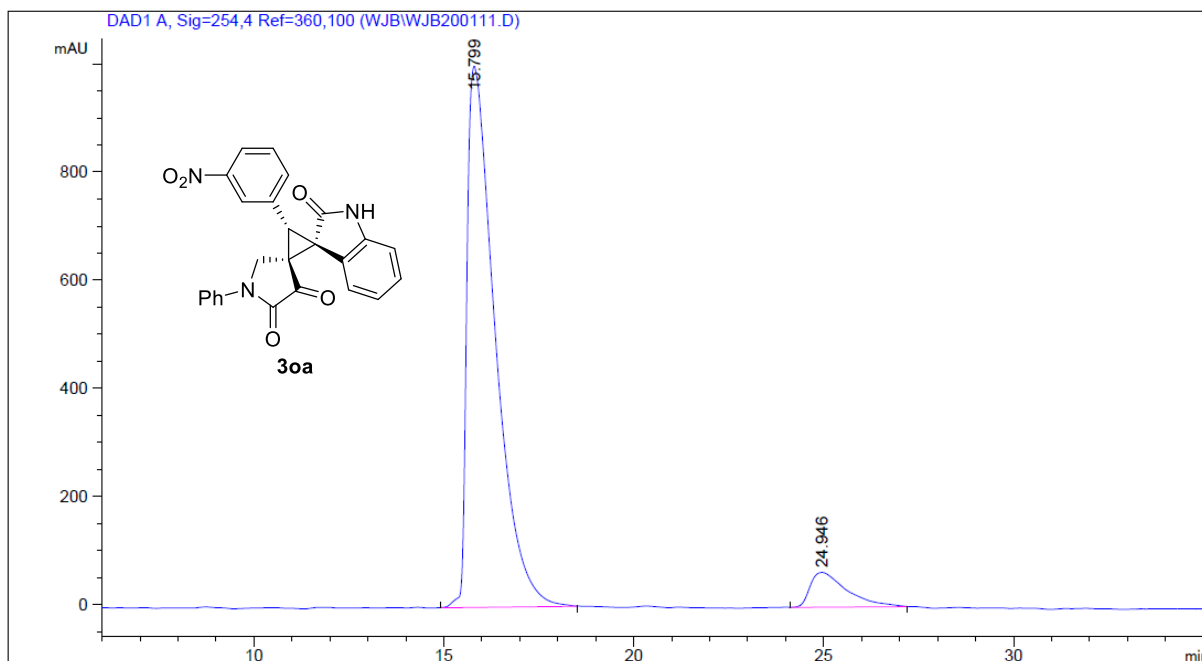

| # | Ret Time(min) | Width(min) | Area(Mau*s) | Height(mAU) | Area(%) |
|---|---------------|------------|-------------|-------------|---------|
| 1 | 15.799        | 0.7501     | 5.16541e4   | 1000.81061  | 92.2739 |
| 2 | 24.946        | 0.9359     | 4325.02783  | 64.36931    | 7.7261  |

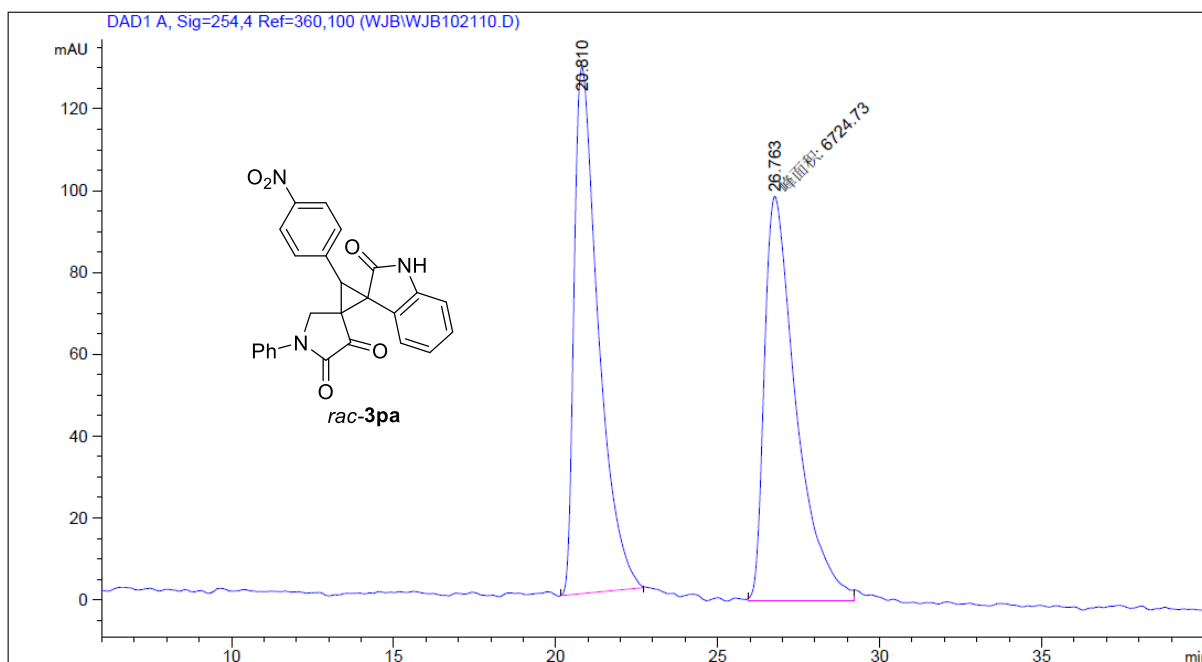

| # | Ret Time(min) | Width(min) | Area(Mau*s) | Height(mAU) | Area(%) |
|---|---------------|------------|-------------|-------------|---------|
| 1 | 20.810        | 0.7465     | 6713.29492  | 128.72269   | 49.9575 |
| 2 | 26.763        | 1.1345     | 6724.72607  | 98.78780    | 50.0425 |

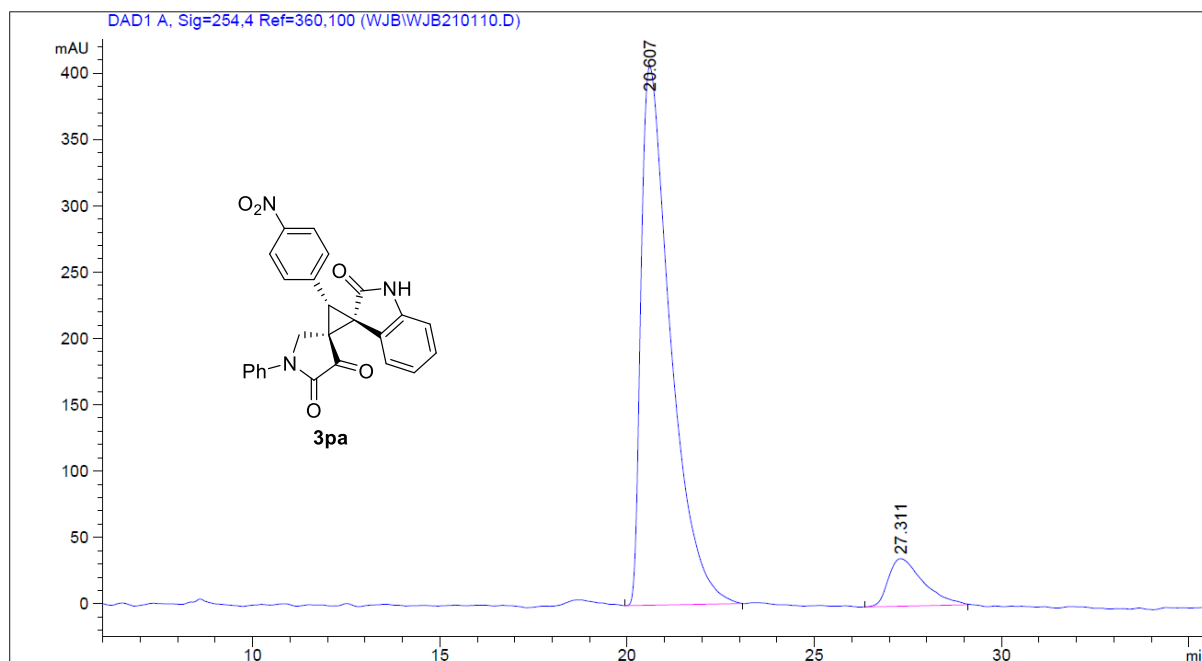

| # | Ret Time(min) | Width(min) | Area(Mau*s) | Height(mAU) | Area(%) |
|---|---------------|------------|-------------|-------------|---------|
| 1 | 20.607        | 0.7973     | 2.22445e4   | 405.97086   | 90.5807 |
| 2 | 27.311        | 0.8911     | 2313.14893  | 35.83347    | 9.4193  |

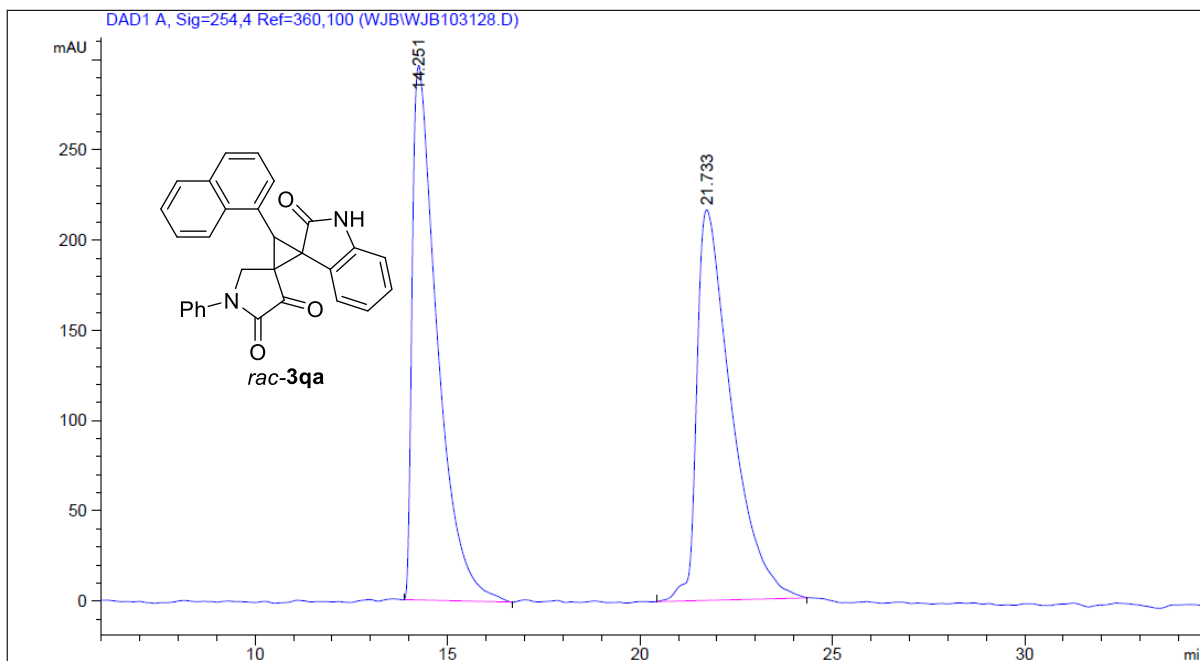

| # | Ret Time(min) | Width(min) | Area(Mau*s) | Height(mAU) | Area(%) |
|---|---------------|------------|-------------|-------------|---------|
| 1 | 14.251        | 0.6567     | 1.34216e4   | 296.19766   | 49.7656 |
| 2 | 21.733        | 0.8865     | 1.35481e4   | 216.38805   | 50.2344 |

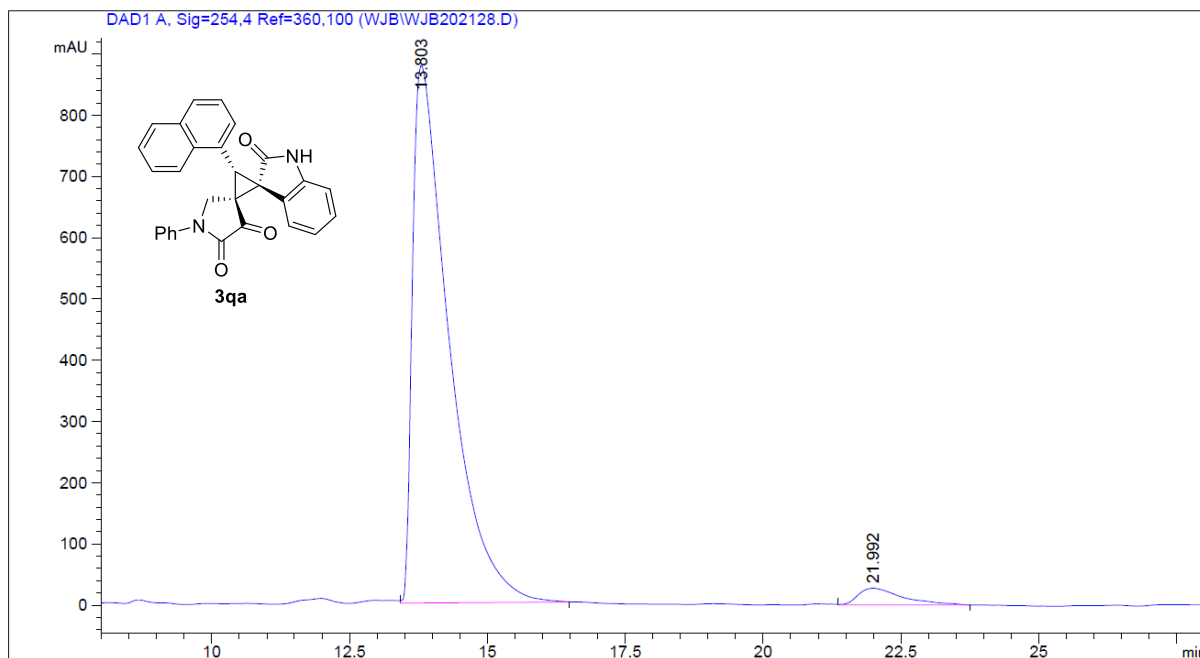

| # | Ret Time(min) | Width(min) | Area(Mau*s) | Height(mAU) | Area(%) |
|---|---------------|------------|-------------|-------------|---------|
| 1 | 13.803        | 0.6595     | 4.05892e4   | 877.67865   | 96.3428 |
| 2 | 21.992        | 0.7535     | 1540.76660  | 27.33979    | 3.6572  |

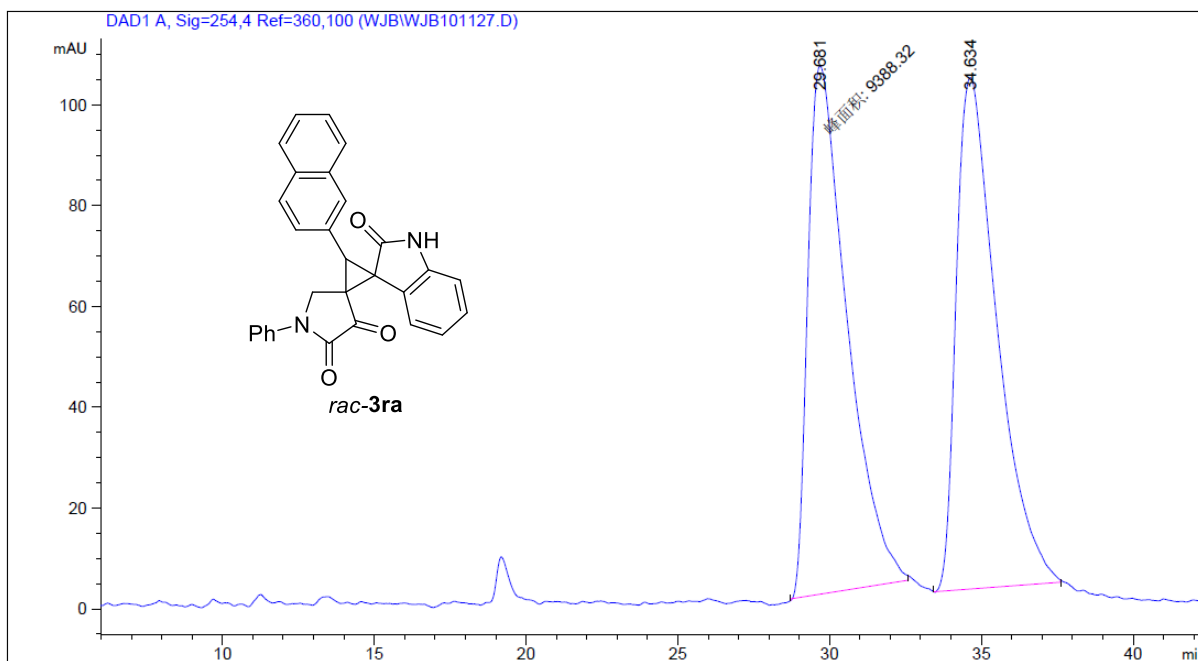

| # | Ret Time(min) | Width(min) | Area(Mau*s) | Height(mAU) | Area(%) |
|---|---------------|------------|-------------|-------------|---------|
| 1 | 29.681        | 1.4931     | 9388.31934  | 104.79726   | 49.7929 |
| 2 | 34.634        | 1.2460     | 9466.41211  | 101.51268   | 50.2071 |

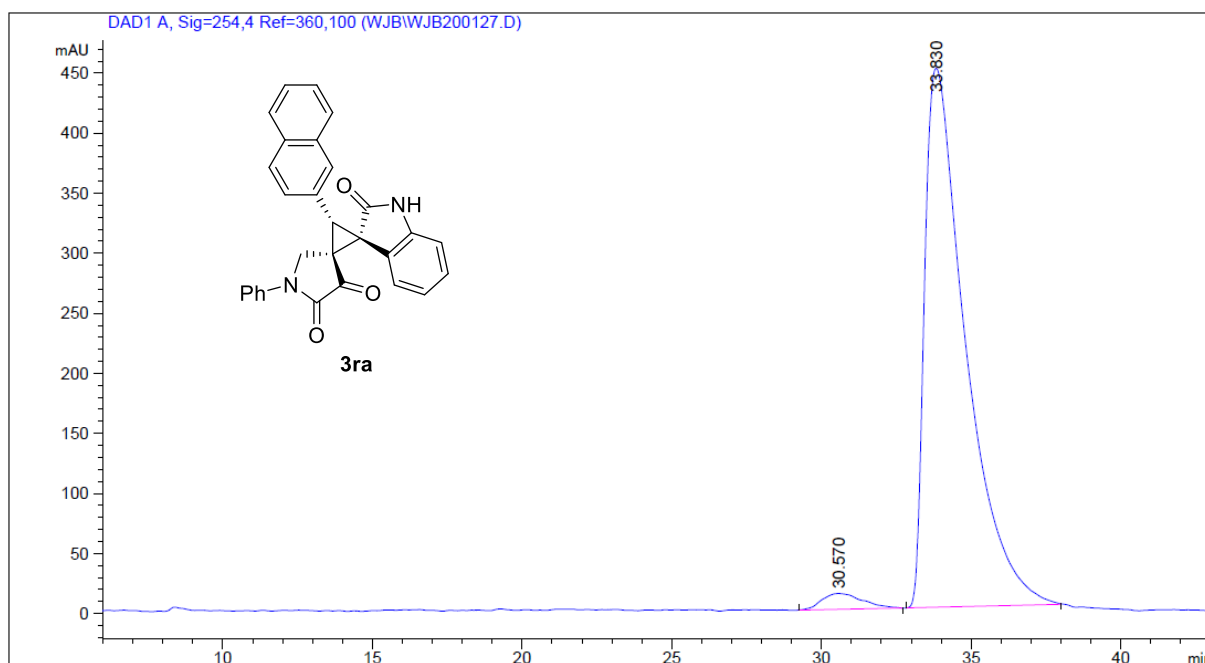

| # | Ret Time(min) | Width(min) | Area(Mau*s) | Height(mAU) | Area(%) |
|---|---------------|------------|-------------|-------------|---------|
| 1 | 30.570        | 1.1135     | 1245.01160  | 13.18698    | 2.8418  |
| 2 | 33.830        | 1.3358     | 4.25657e4   | 449.08600   | 97.1582 |

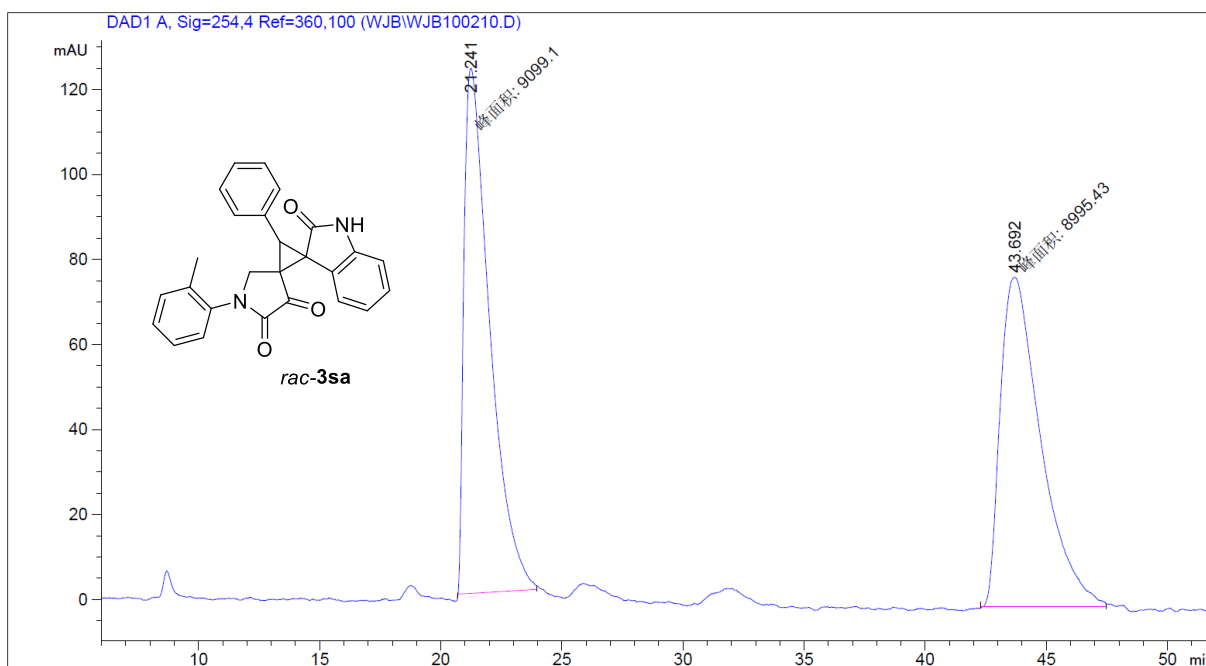

| # | Ret Time(min) | Width(min) | Area(Mau*s) | Height(mAU) | Area(%) |
|---|---------------|------------|-------------|-------------|---------|
| 1 | 21.241        | 1.2271     | 9099.09766  | 123.58936   | 50.2865 |
| 2 | 43.692        | 1.9358     | 8995.42969  | 77.44735    | 49.7135 |

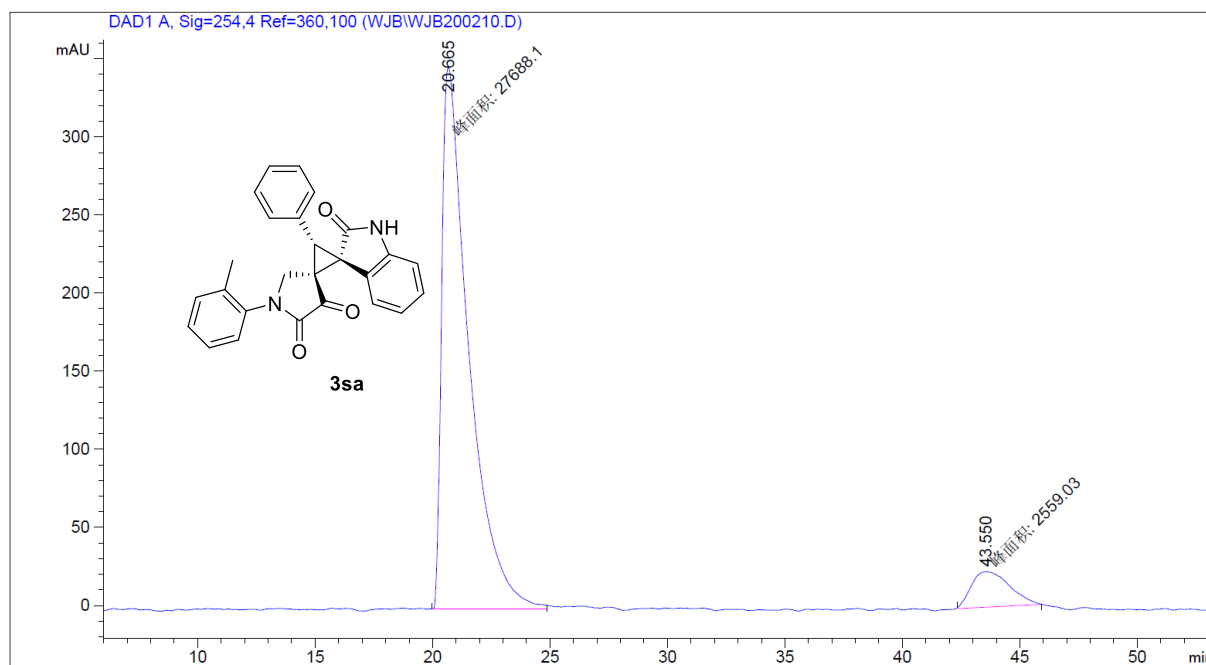

| # | Ret Time(min) | Width(min) | Area(Mau*s) | Height(mAU) | Area(%) |
|---|---------------|------------|-------------|-------------|---------|
| 1 | 20.665        | 1.3309     | 2.76881e4   | 346.72131   | 91.5396 |
| 2 | 43.550        | 1.8733     | 2559.03125  | 22.76762    | 8.4604  |

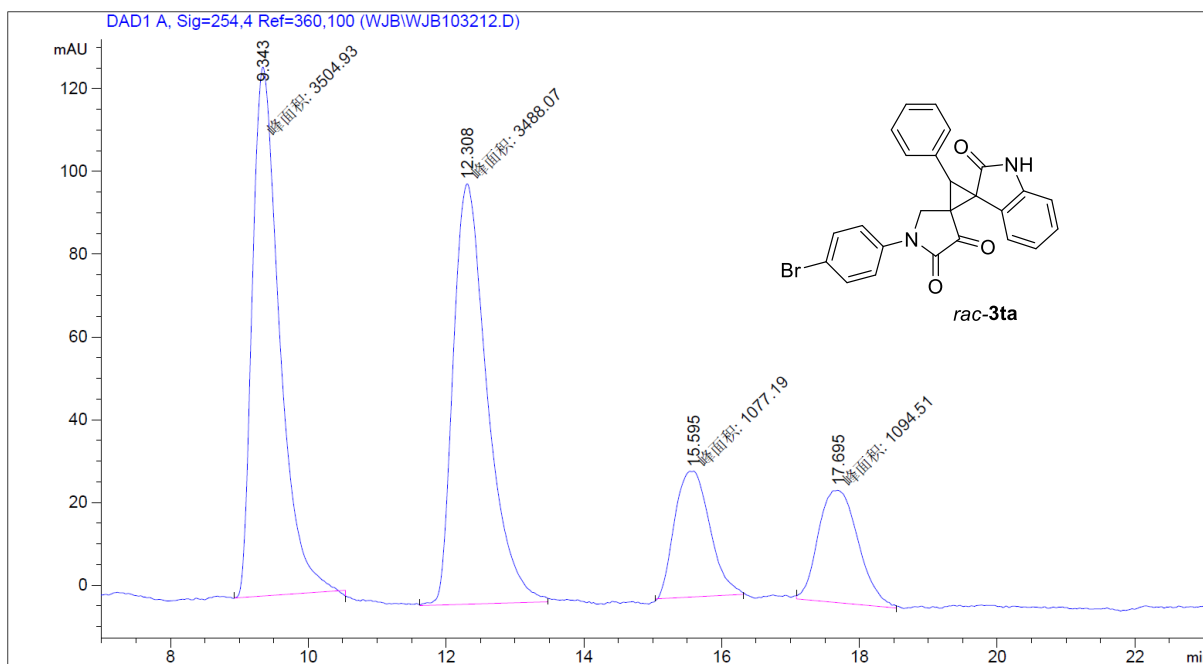

| # | Ret Time(min) | Width(min) | Area(Mau*s) | Height(mAU) | Area(%) |
|---|---------------|------------|-------------|-------------|---------|
| 1 | 9.343         | 0.4568     | 3504.93188  | 127.87173   | 38.2438 |
| 2 | 12.308        | 0.5720     | 3488.07300  | 101.63976   | 38.0598 |
| 3 | 15.595        | 0.5905     | 1077.19214  | 30.40416    | 11.7537 |
| 4 | 17.695        | 0.6714     | 1094.50964  | 27.17075    | 11.9427 |

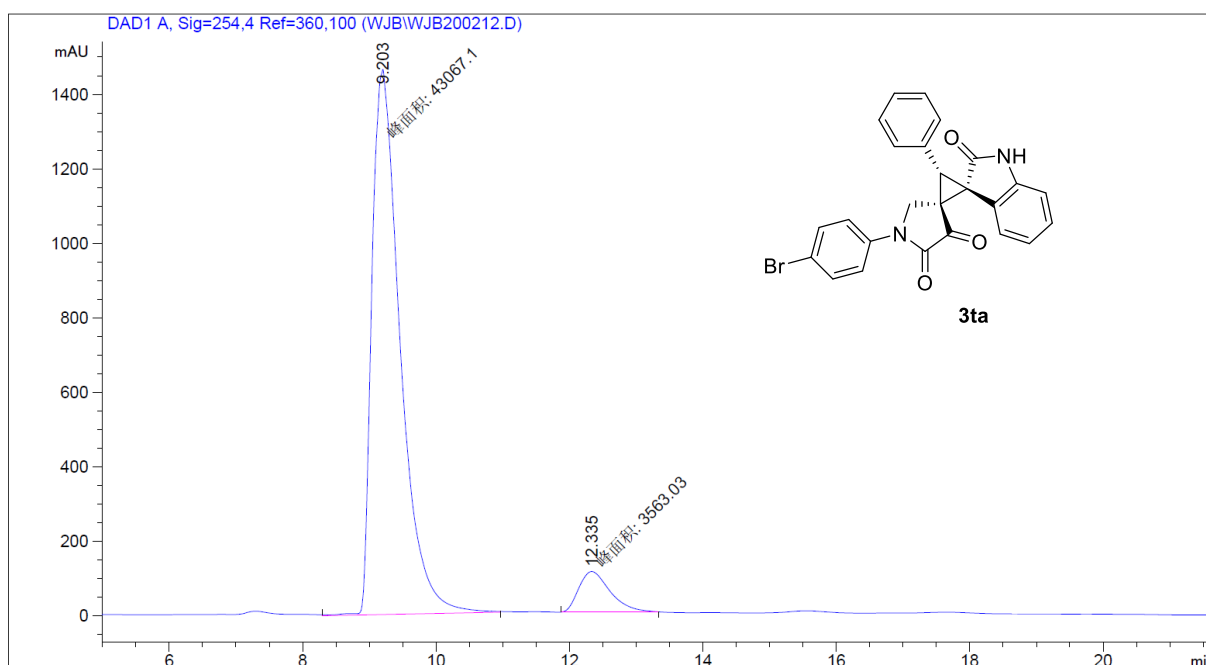

| # | Ret Time(min) | Width(min) | Area(Mau*s) | Height(mAU) | Area(%) |
|---|---------------|------------|-------------|-------------|---------|
| 1 | 9.203         | 0.4902     | 4.30671e4   | 1464.29041  | 92.3590 |
| 2 | 12.335        | 0.5452     | 3563.02954  | 108.92046   | 7.6410  |

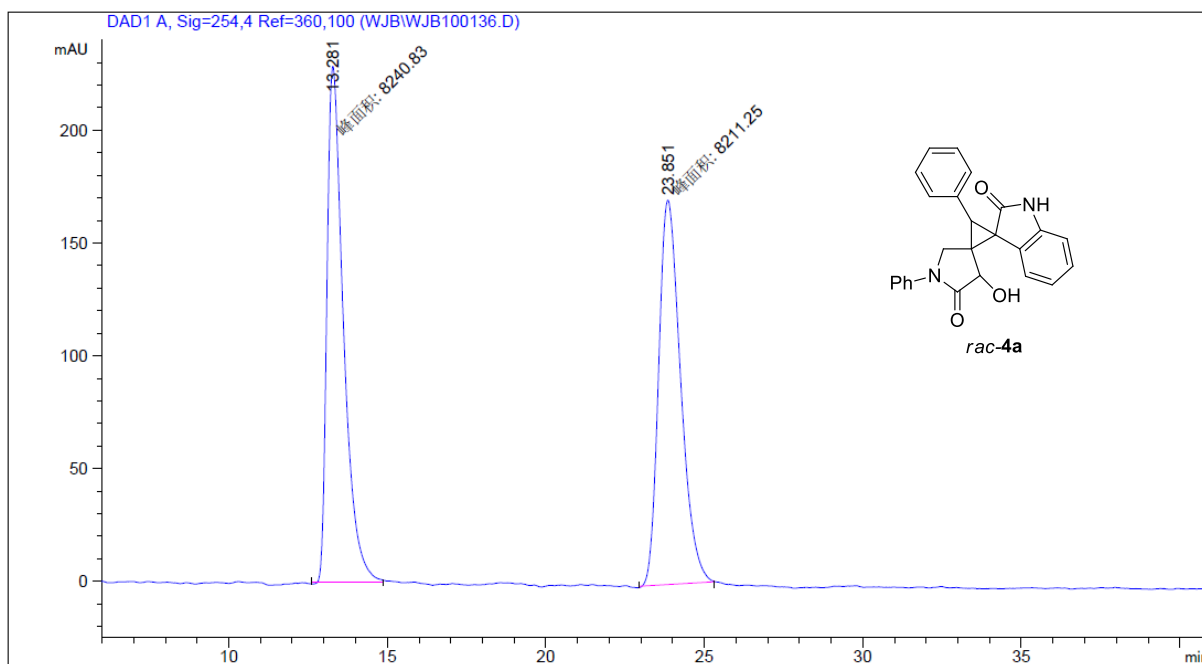

| # | Ret Time(min) | Width(min) | Area(Mau*s) | Height(mAU) | Area(%) |
|---|---------------|------------|-------------|-------------|---------|
| 1 | 13.281        | 0.6010     | 8240.82813  | 228.54436   | 50.0899 |
| 2 | 23.851        | 0.8031     | 8211.25195  | 170.39844   | 49.9101 |

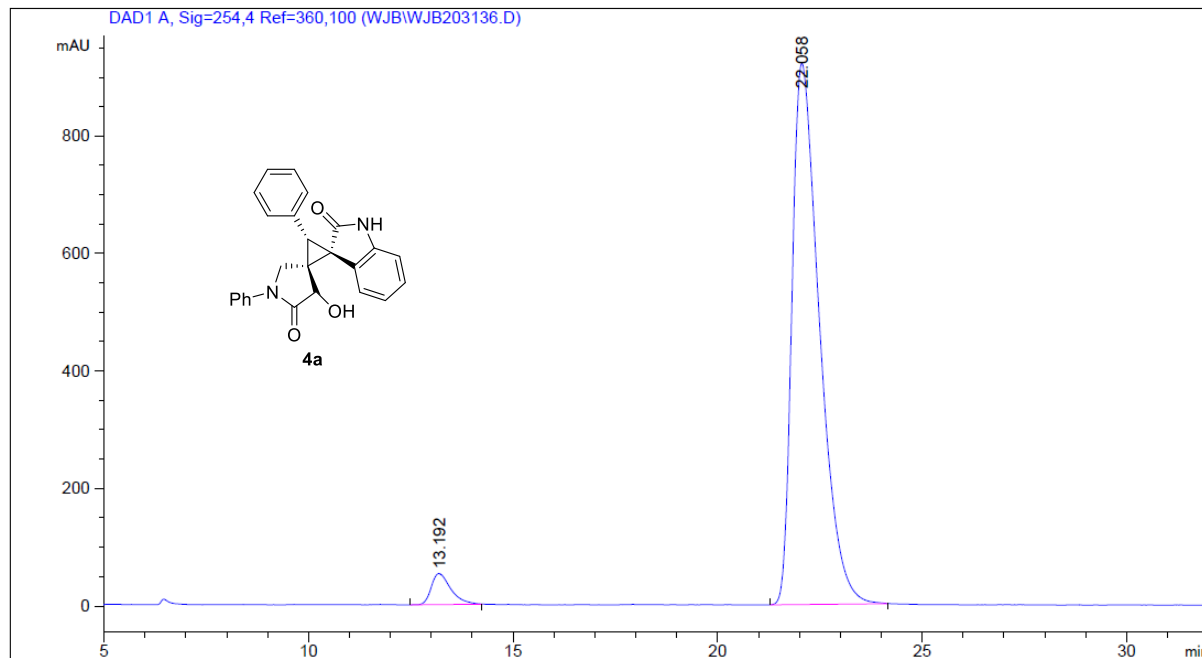

| # | Ret Time(min) | Width(min) | Area(Mau*s) | Height(mAU) | Area(%) |
|---|---------------|------------|-------------|-------------|---------|
| 1 | 13.192        | 0.4852     | 1766.45776  | 52.95348    | 3.9628  |
| 2 | 22.058        | 0.7022     | 4.28100e4   | 921.09808   | 96.0372 |

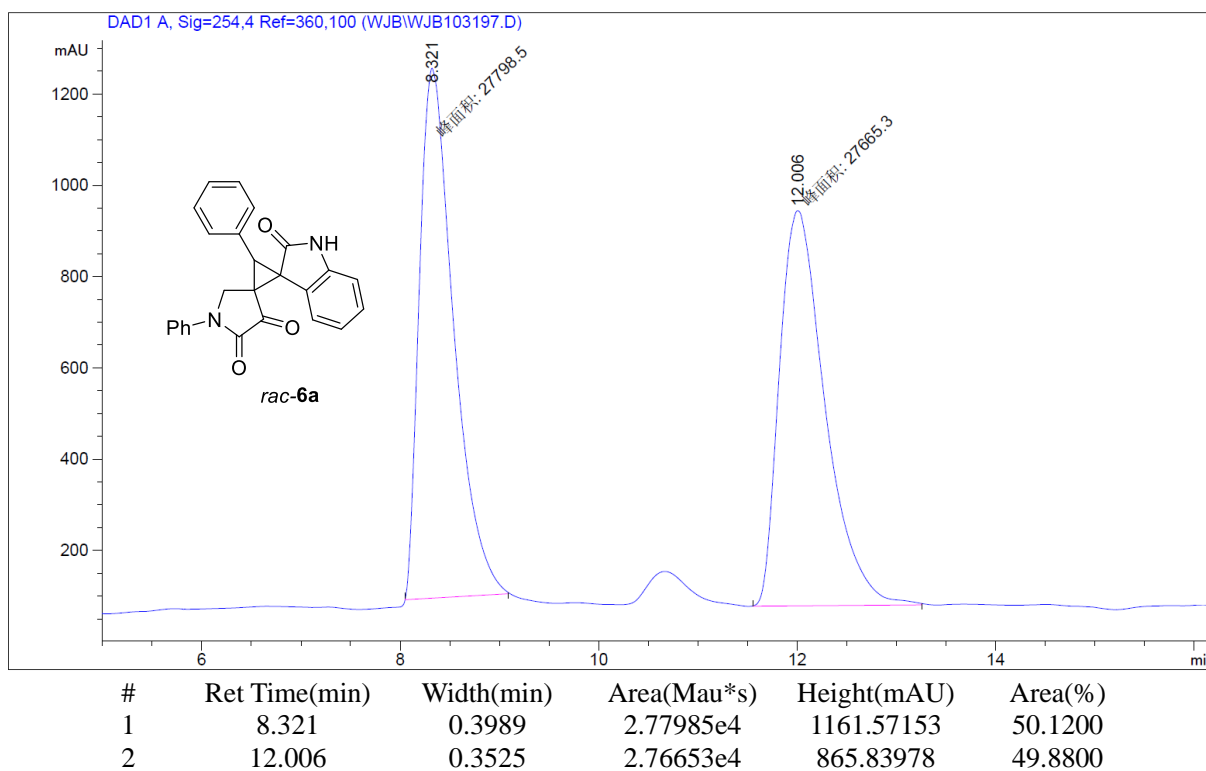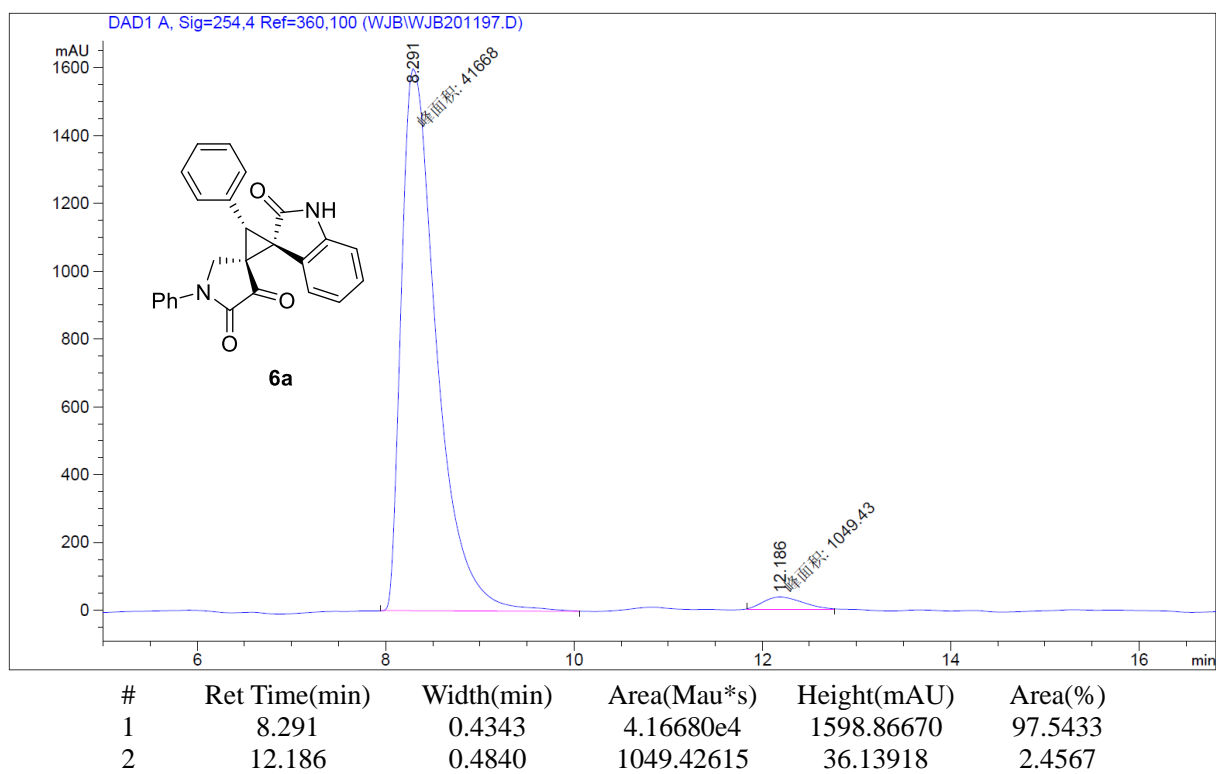

Supplement: c9ob02663k1.pdf [file c9ob02663k1.pdf]
